# Supplementary material
Source: publisher figshare collection journal article supplement (https://acs.figshare.com/ndownloader/files/14327117)

SUPPORTING INFORMATION

PROTON NMR AND SELECTED CARBON NMR SPECTRA

for the  
communication  
entitled

**Synthesis of Amino-Substituted  $\alpha$ - and  $\delta$ -Carbolines via Metal-Free [2 + 2 + 2]  
Cycloaddition of Functionalized Alkyne-Nitriles with Ynamides**

authored by

Jingyi Zhang,<sup>†</sup> Meichao Guo,<sup>†</sup> Yajuan Chen, Shuangshuang Zhang, Xiao-Na Wang,\* and Junbiao Chang\*

*Collaborative Innovation Center of New Drug Research and Safety Evaluation, Henan Province, Key Laboratory of Advanced Drug Preparation Technologies, Ministry of Education, School of Pharmaceutical Sciences, and College of Chemistry and Molecular Engineering, Zhengzhou University, Zhengzhou, Henan 450001, P. R. China.*

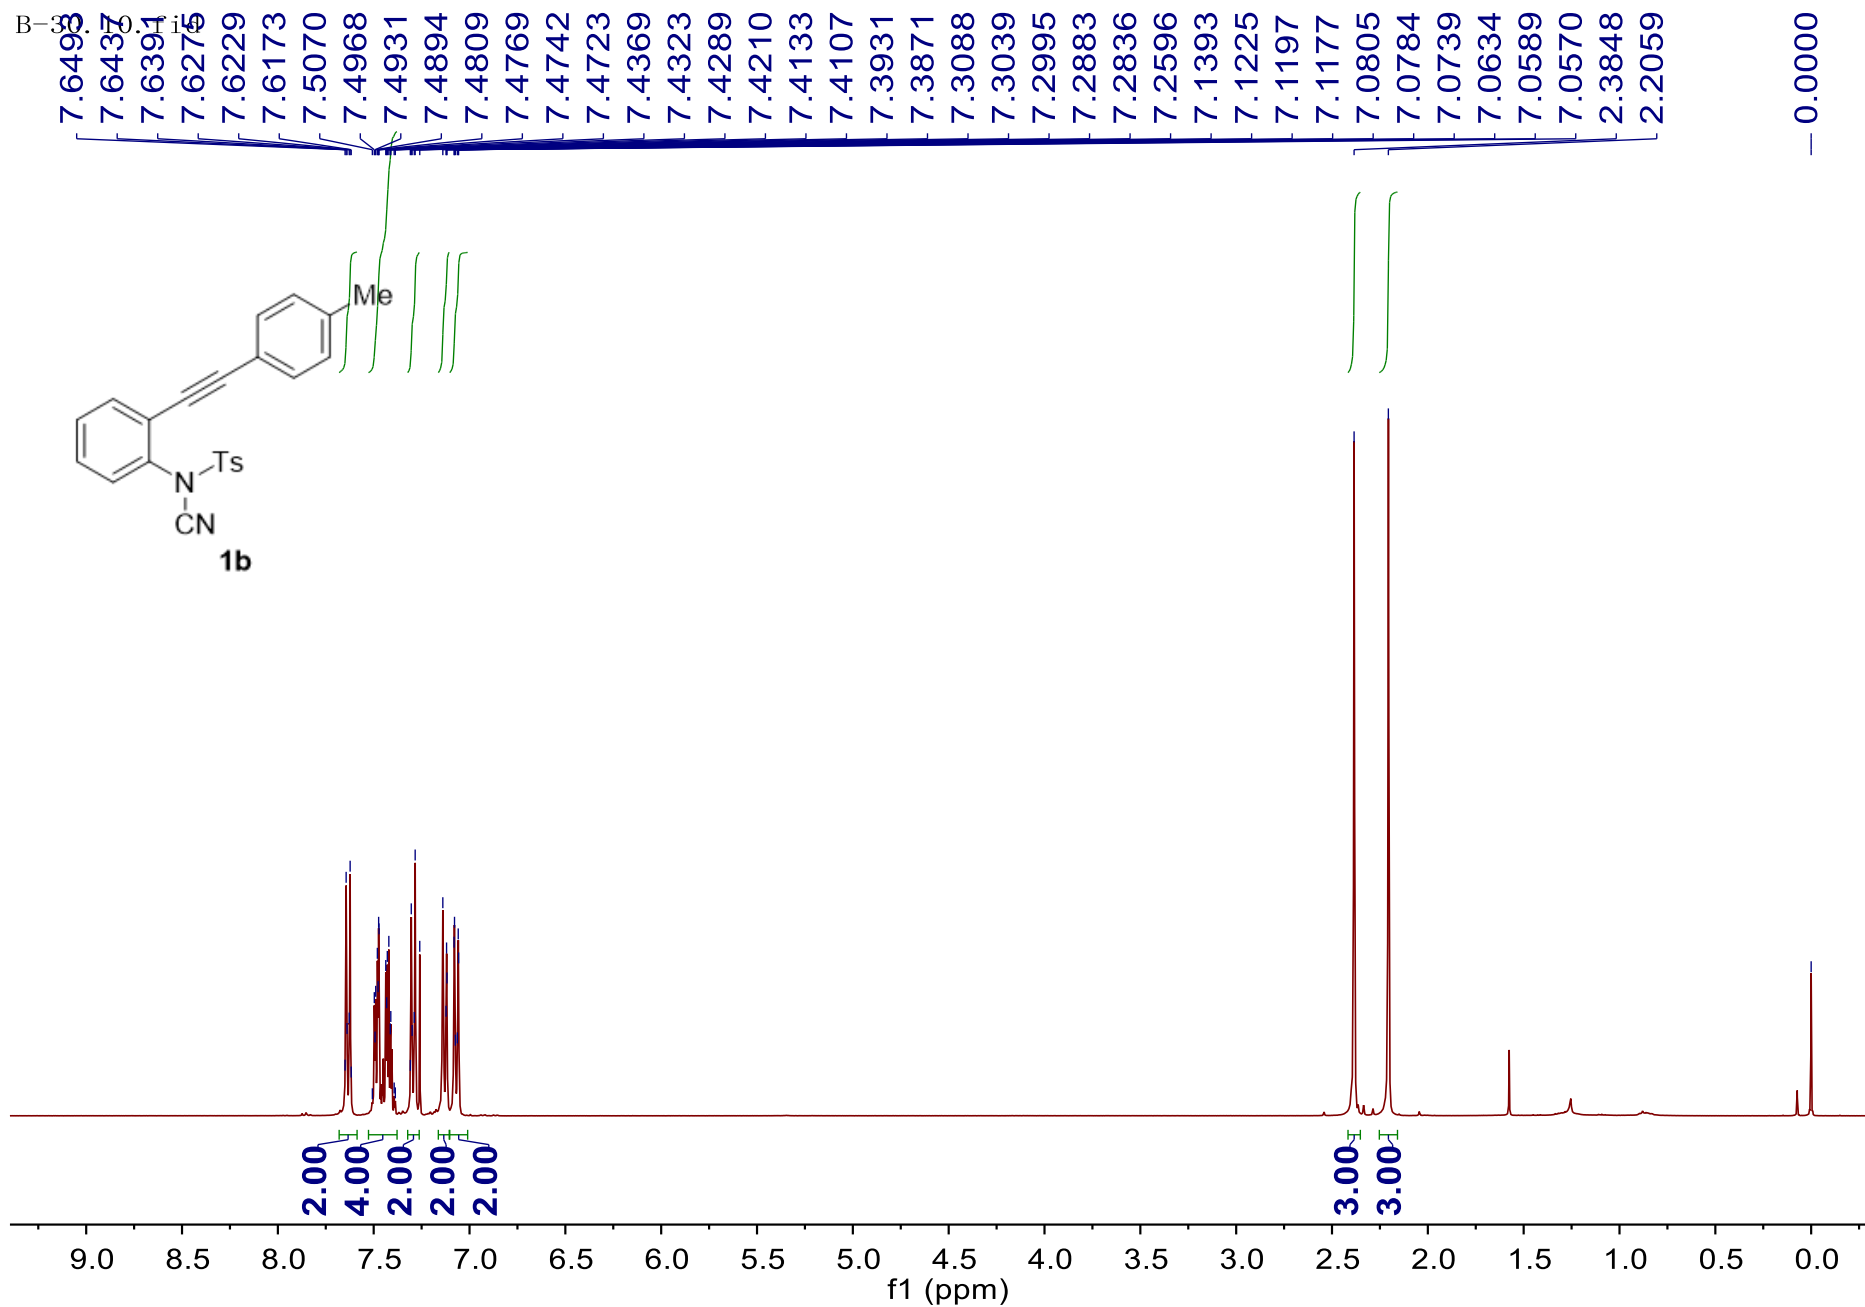

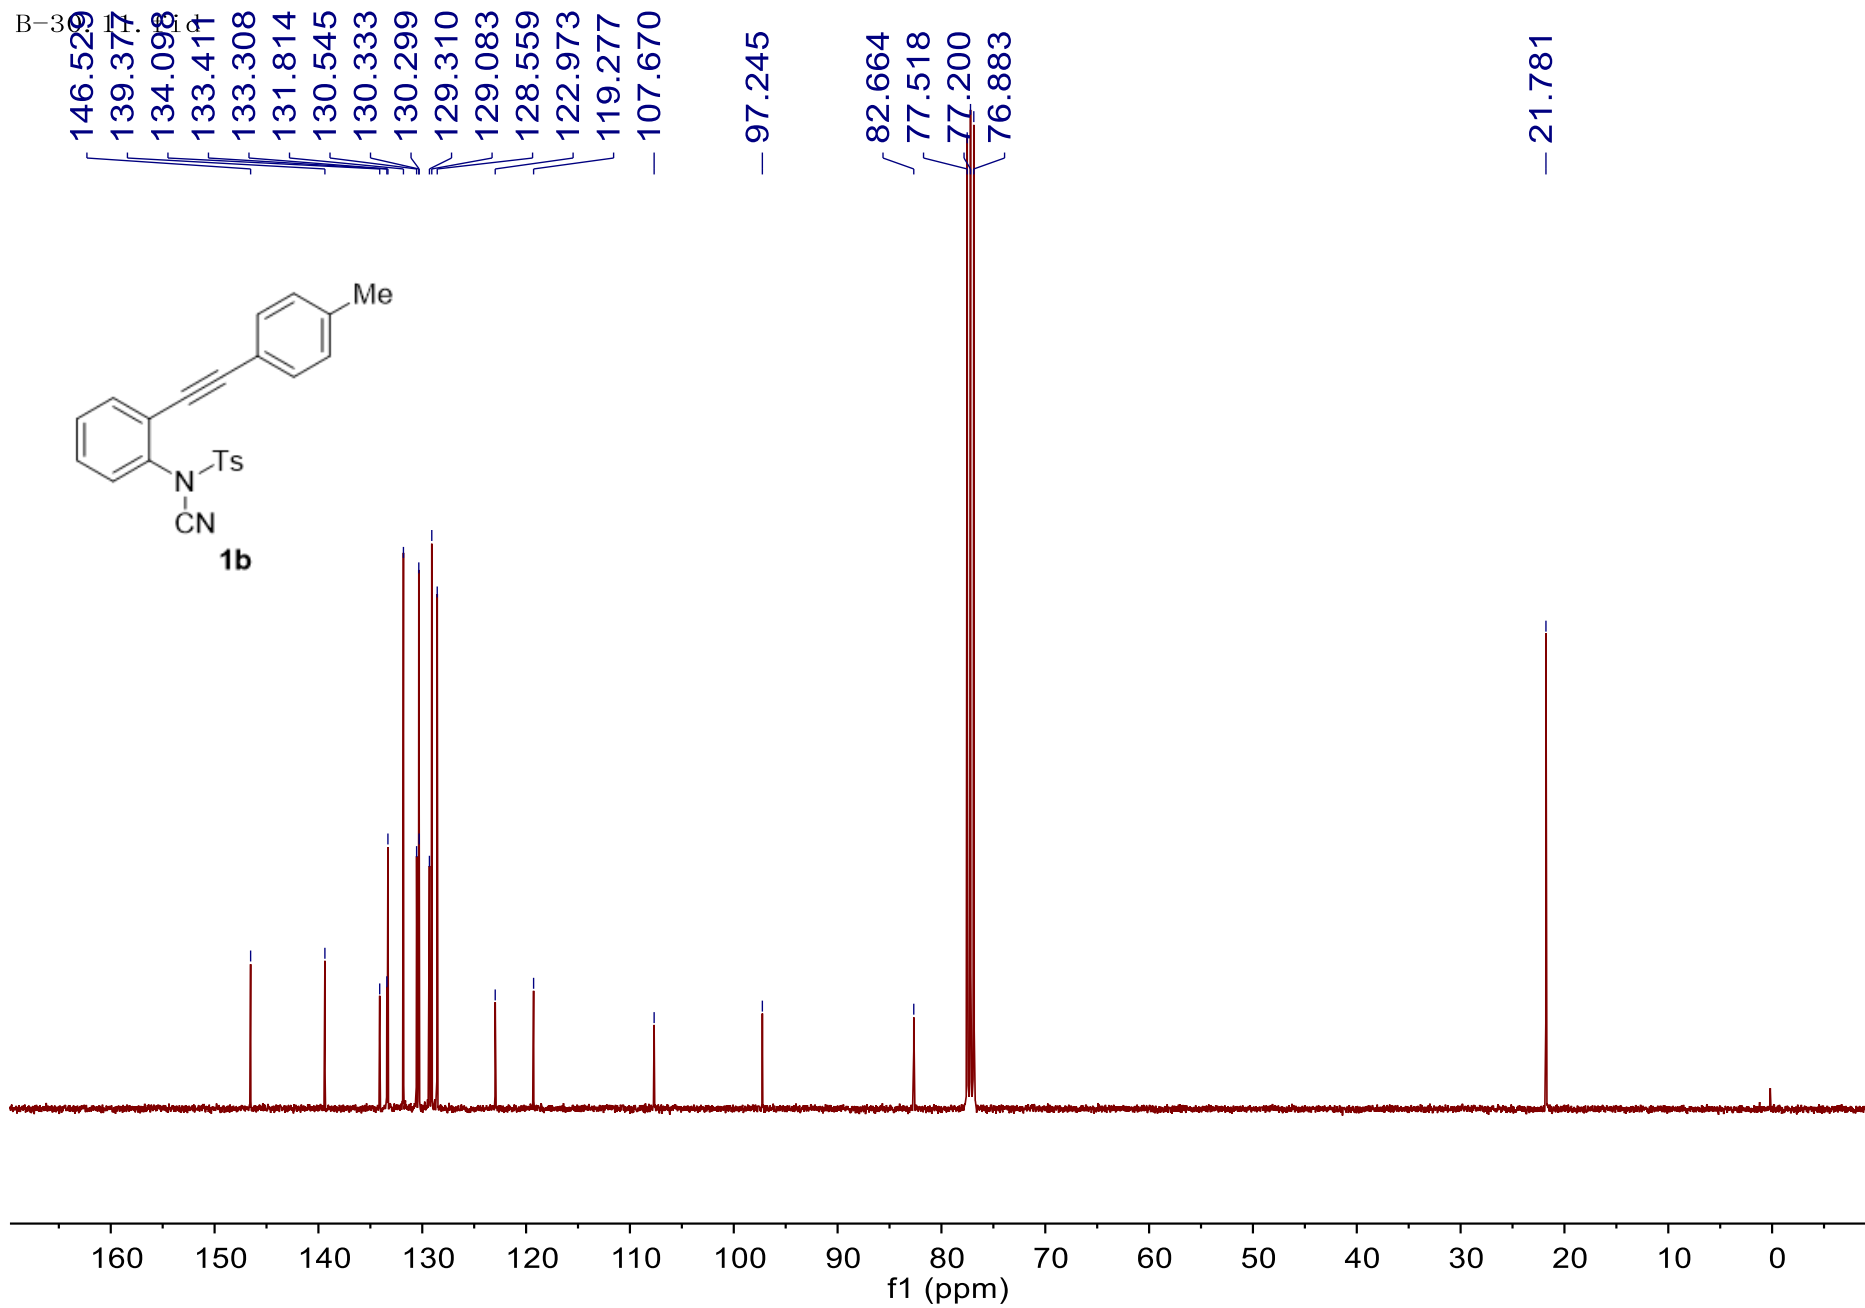

ZJY-B-18811-12d

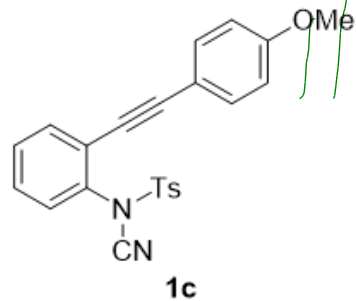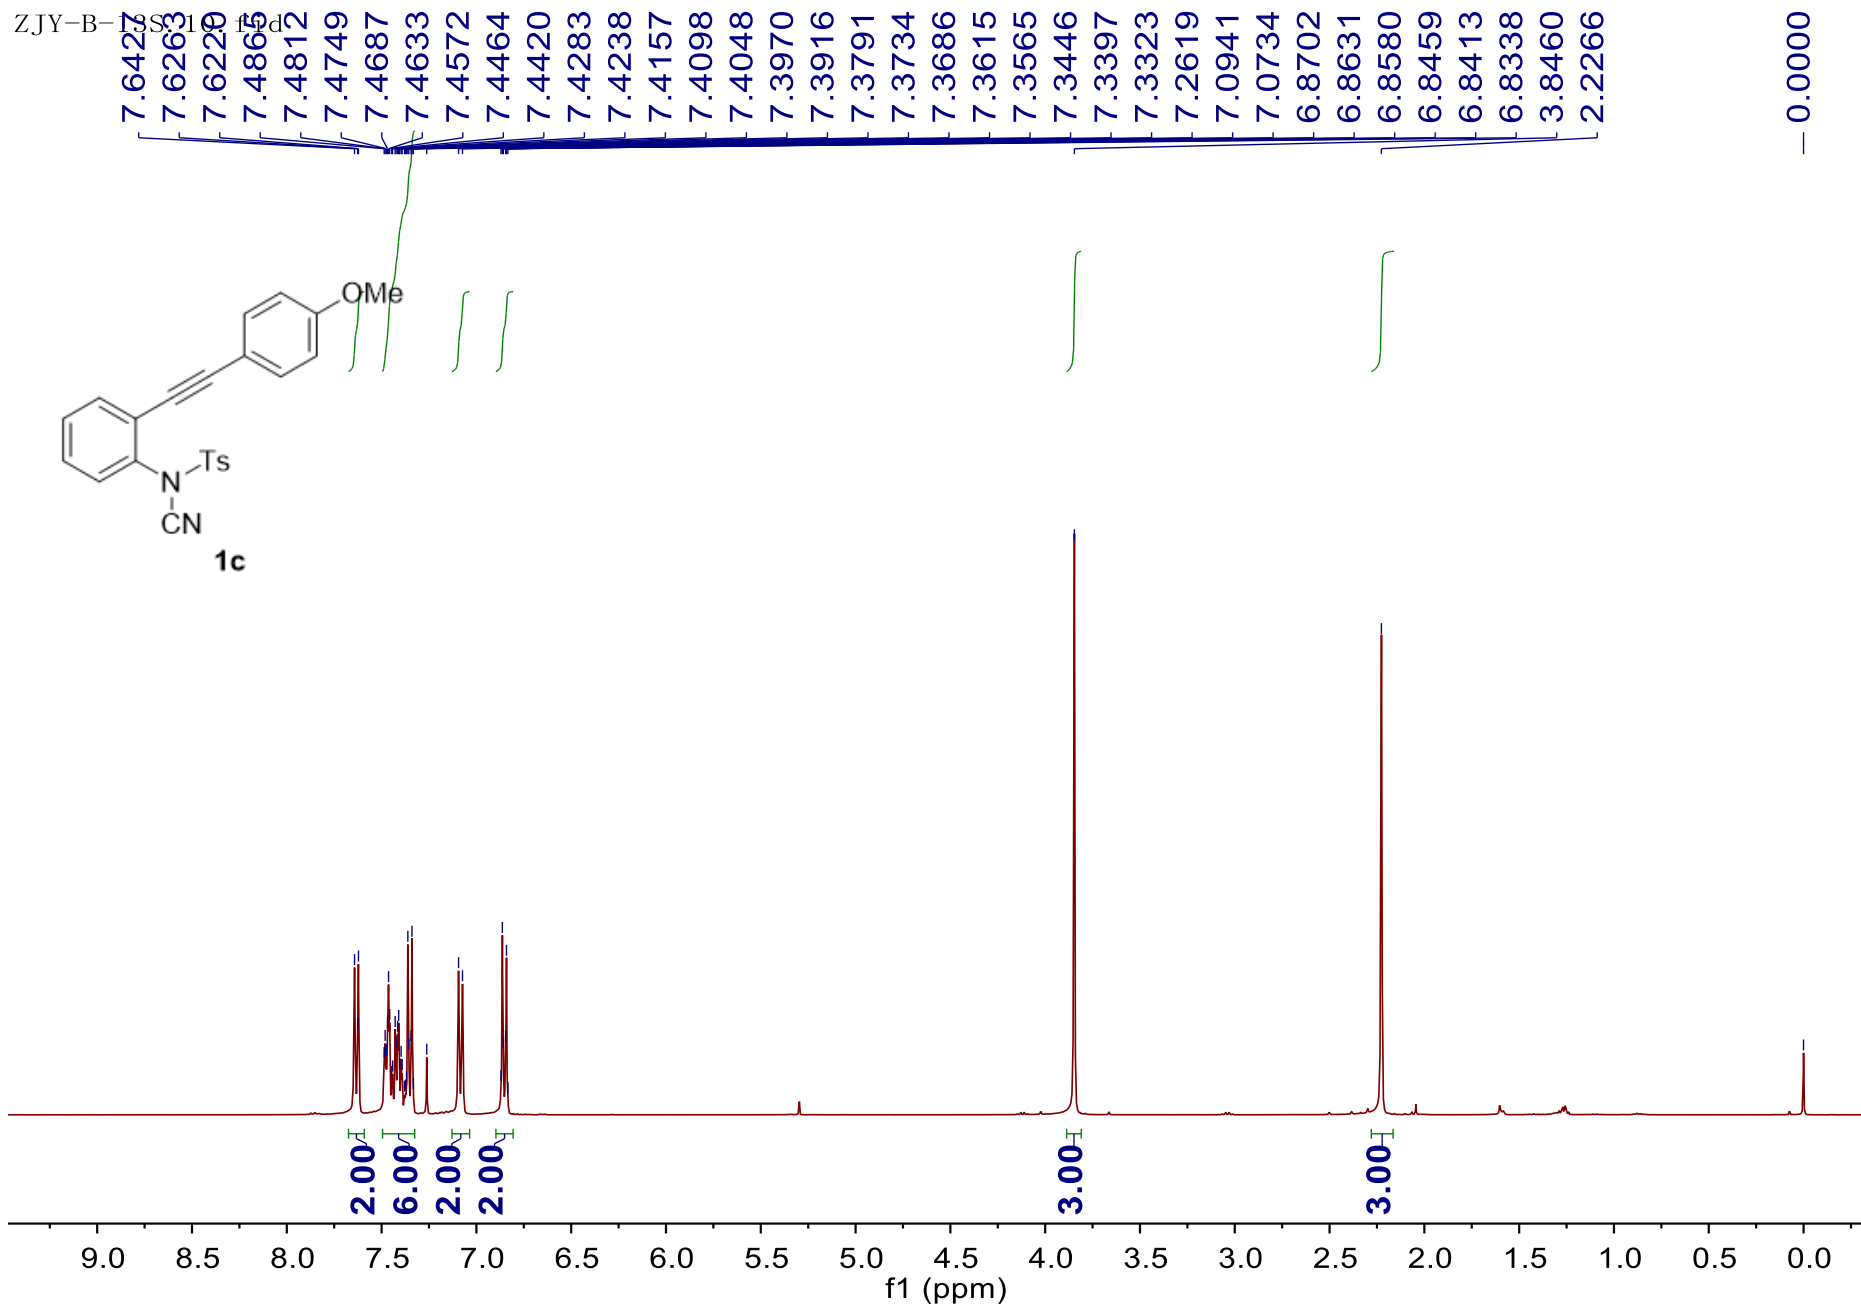



ZJY-B

160.298

146.525

133.952

133.440

133.123

130.532

130.295

130.235

129.107

128.540

123.099

114.470

113.970

107.709

97.199

82.171

77.518

77.200

76.883

55.526

21.820

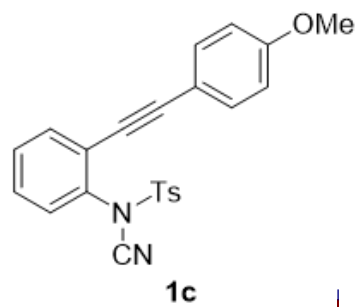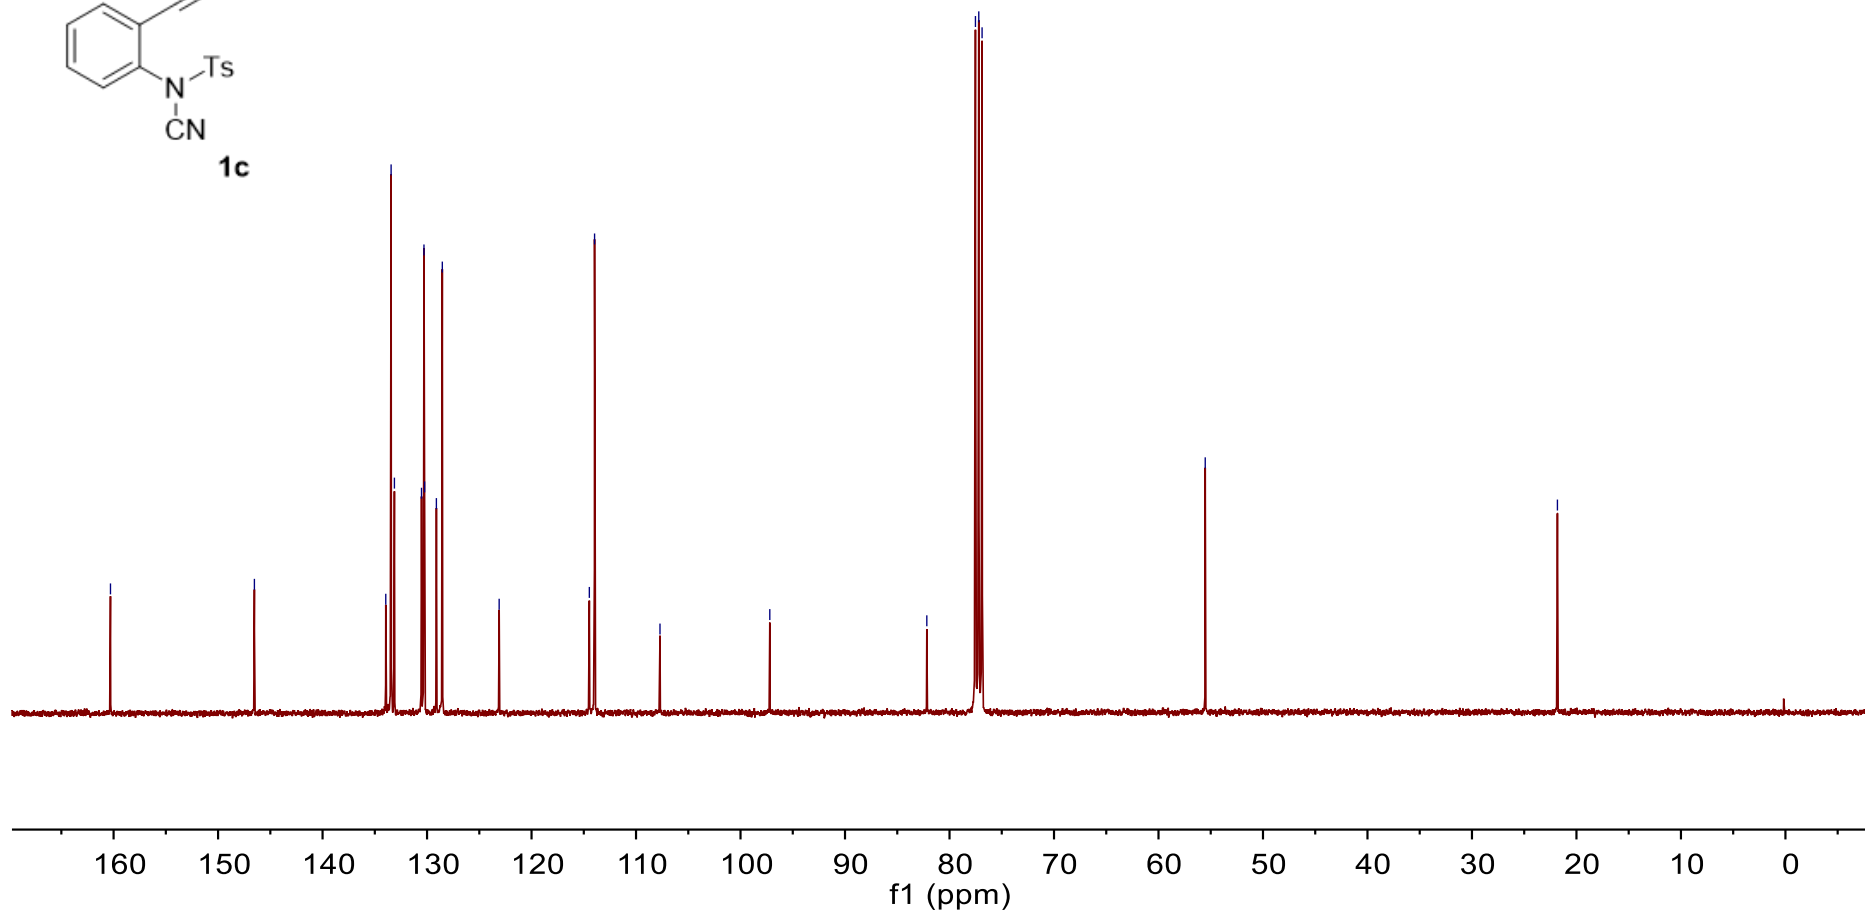

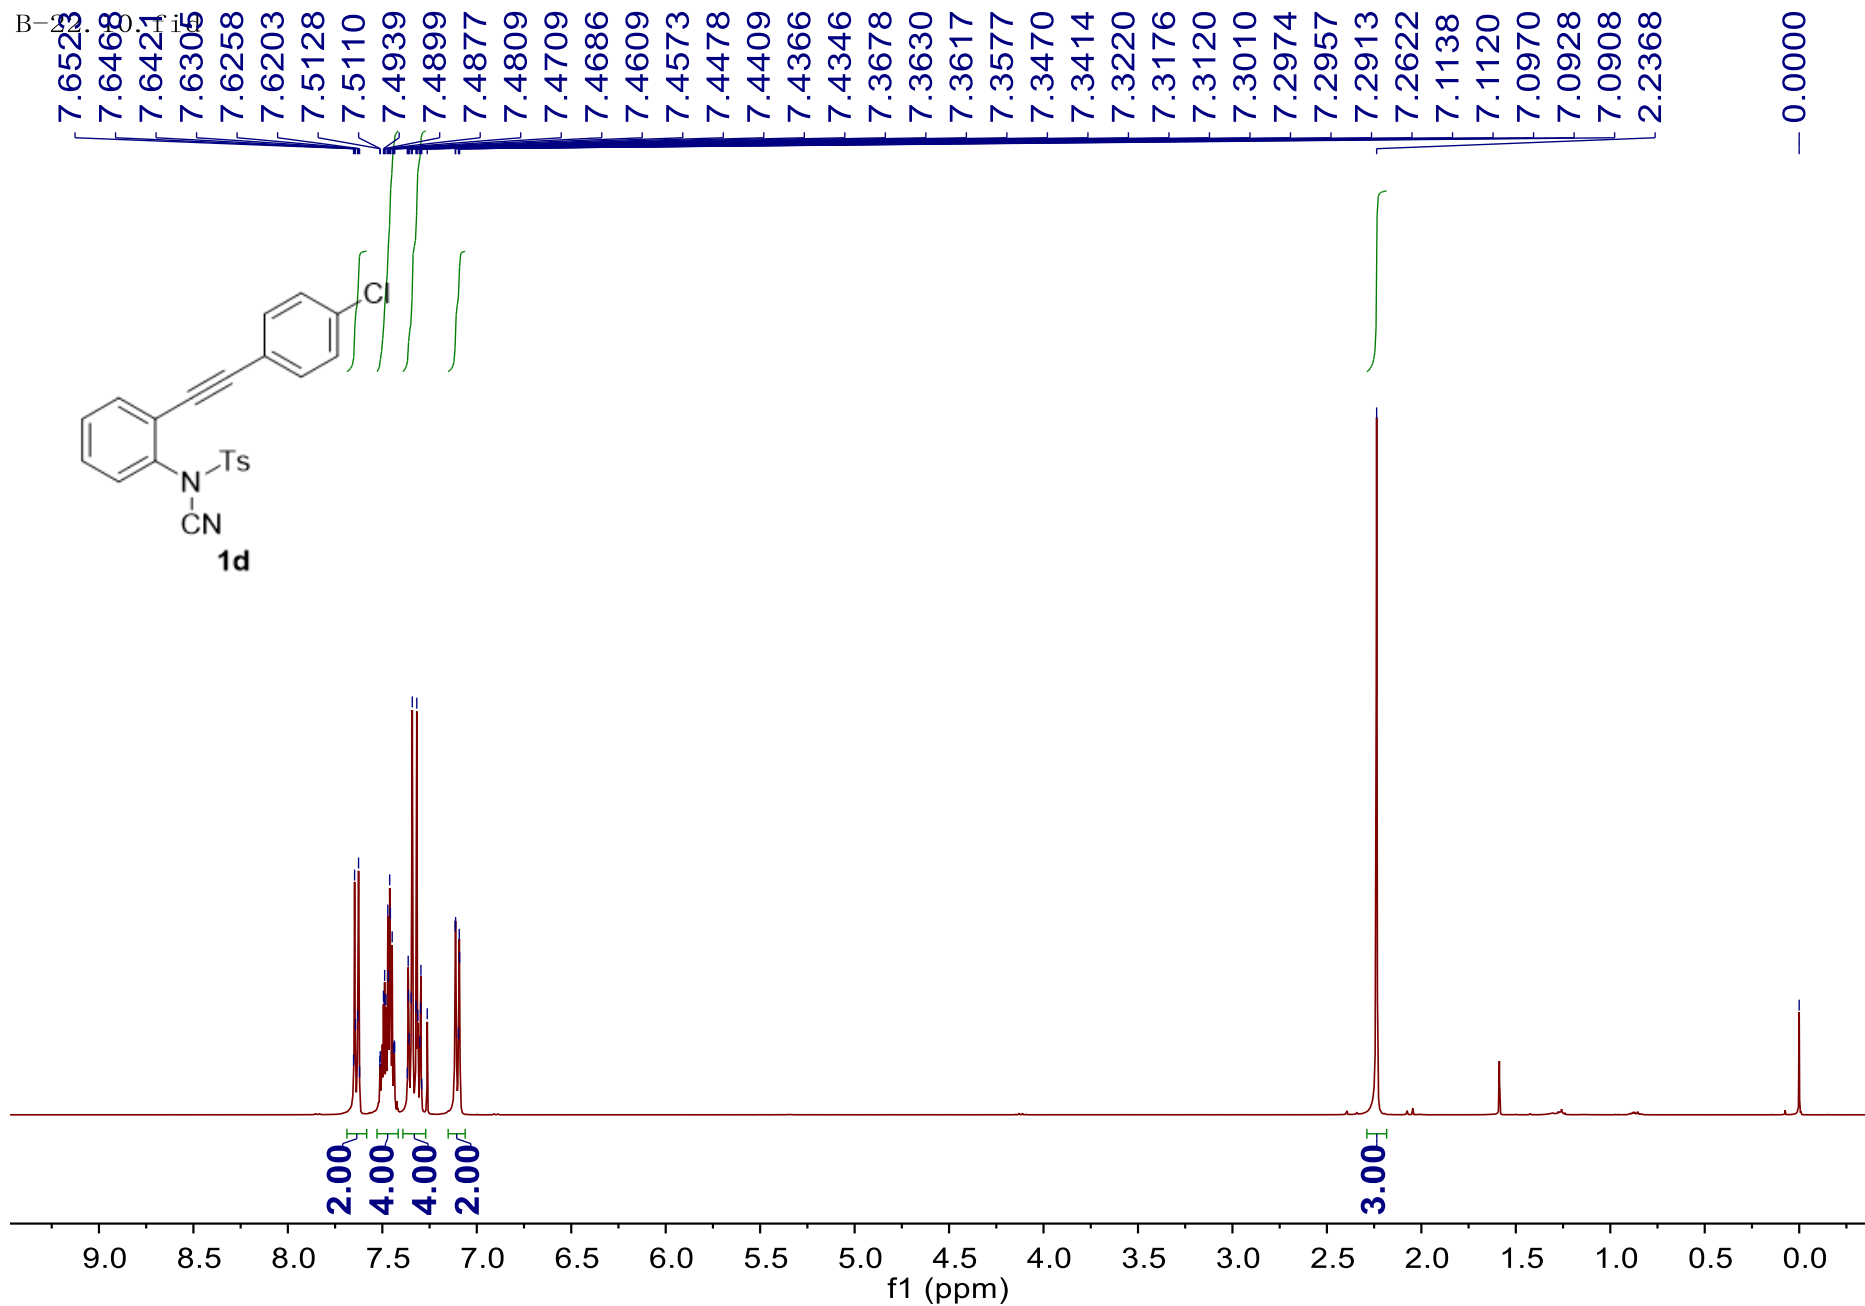

B-2

146.619  
135.260  
134.294  
133.418  
133.332  
133.065  
130.634  
130.354  
130.292  
129.797  
128.720  
128.567  
122.401  
120.799  
107.694

— 95.646

84.197

77.519

77.200

76.883

— 21.801

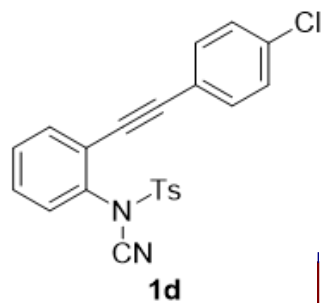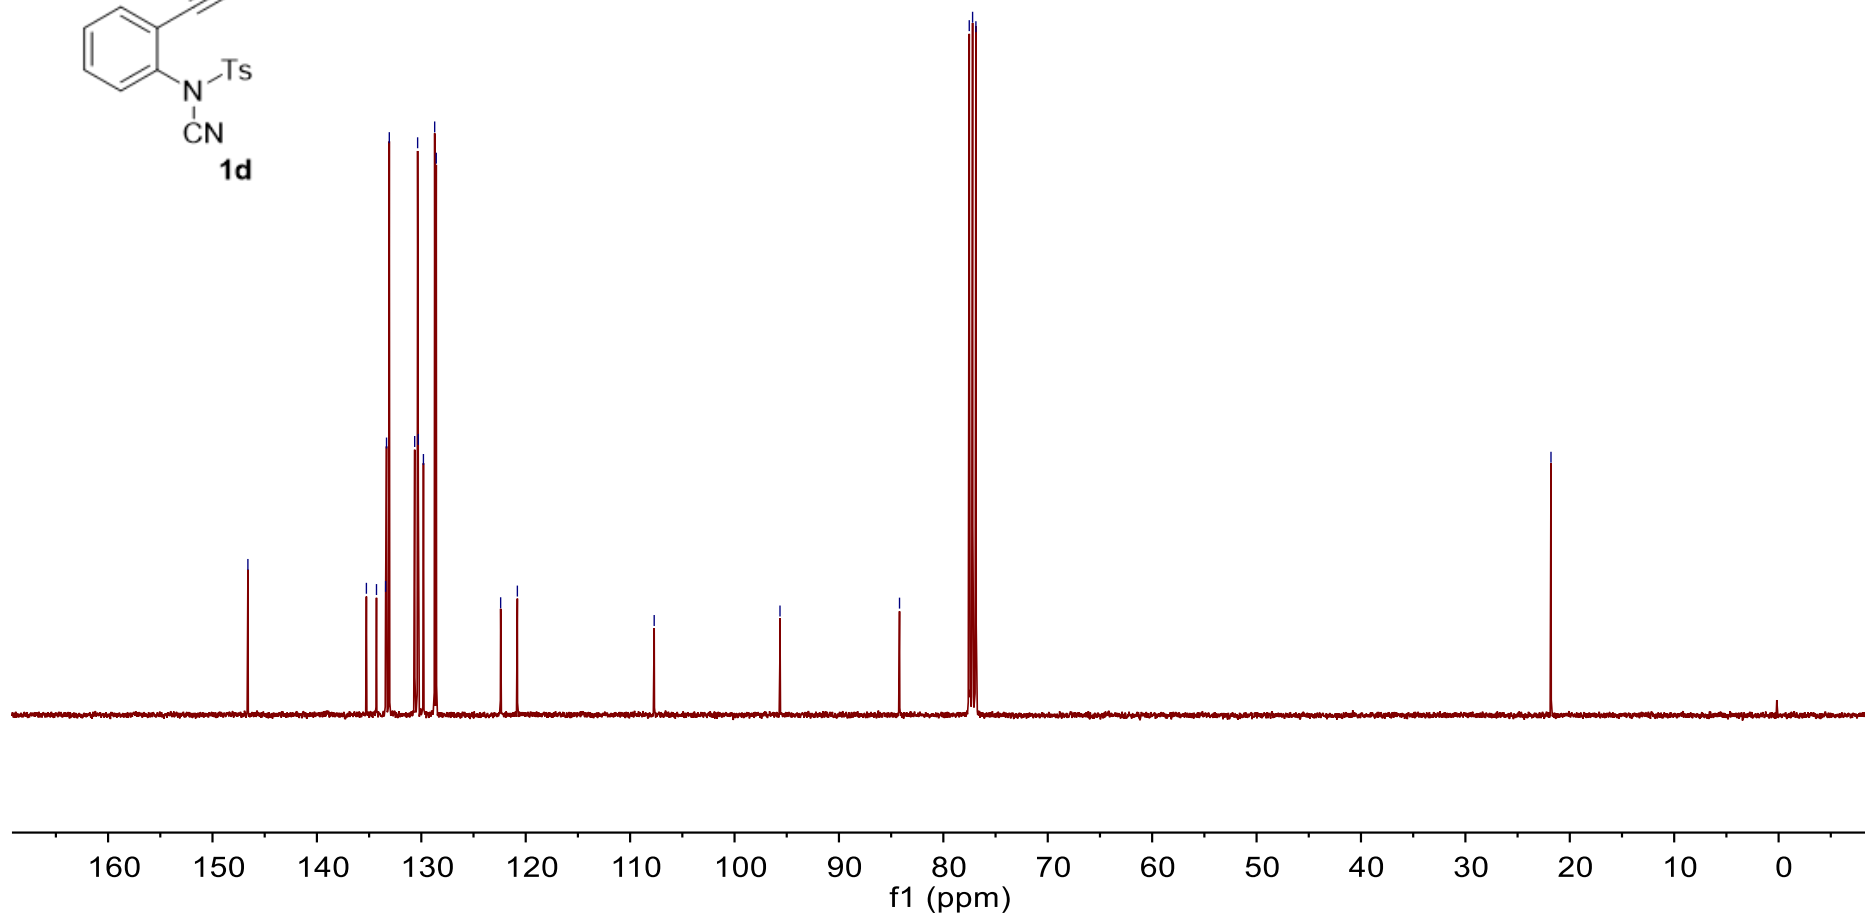

S46

ZJY-B-14S-10.fid

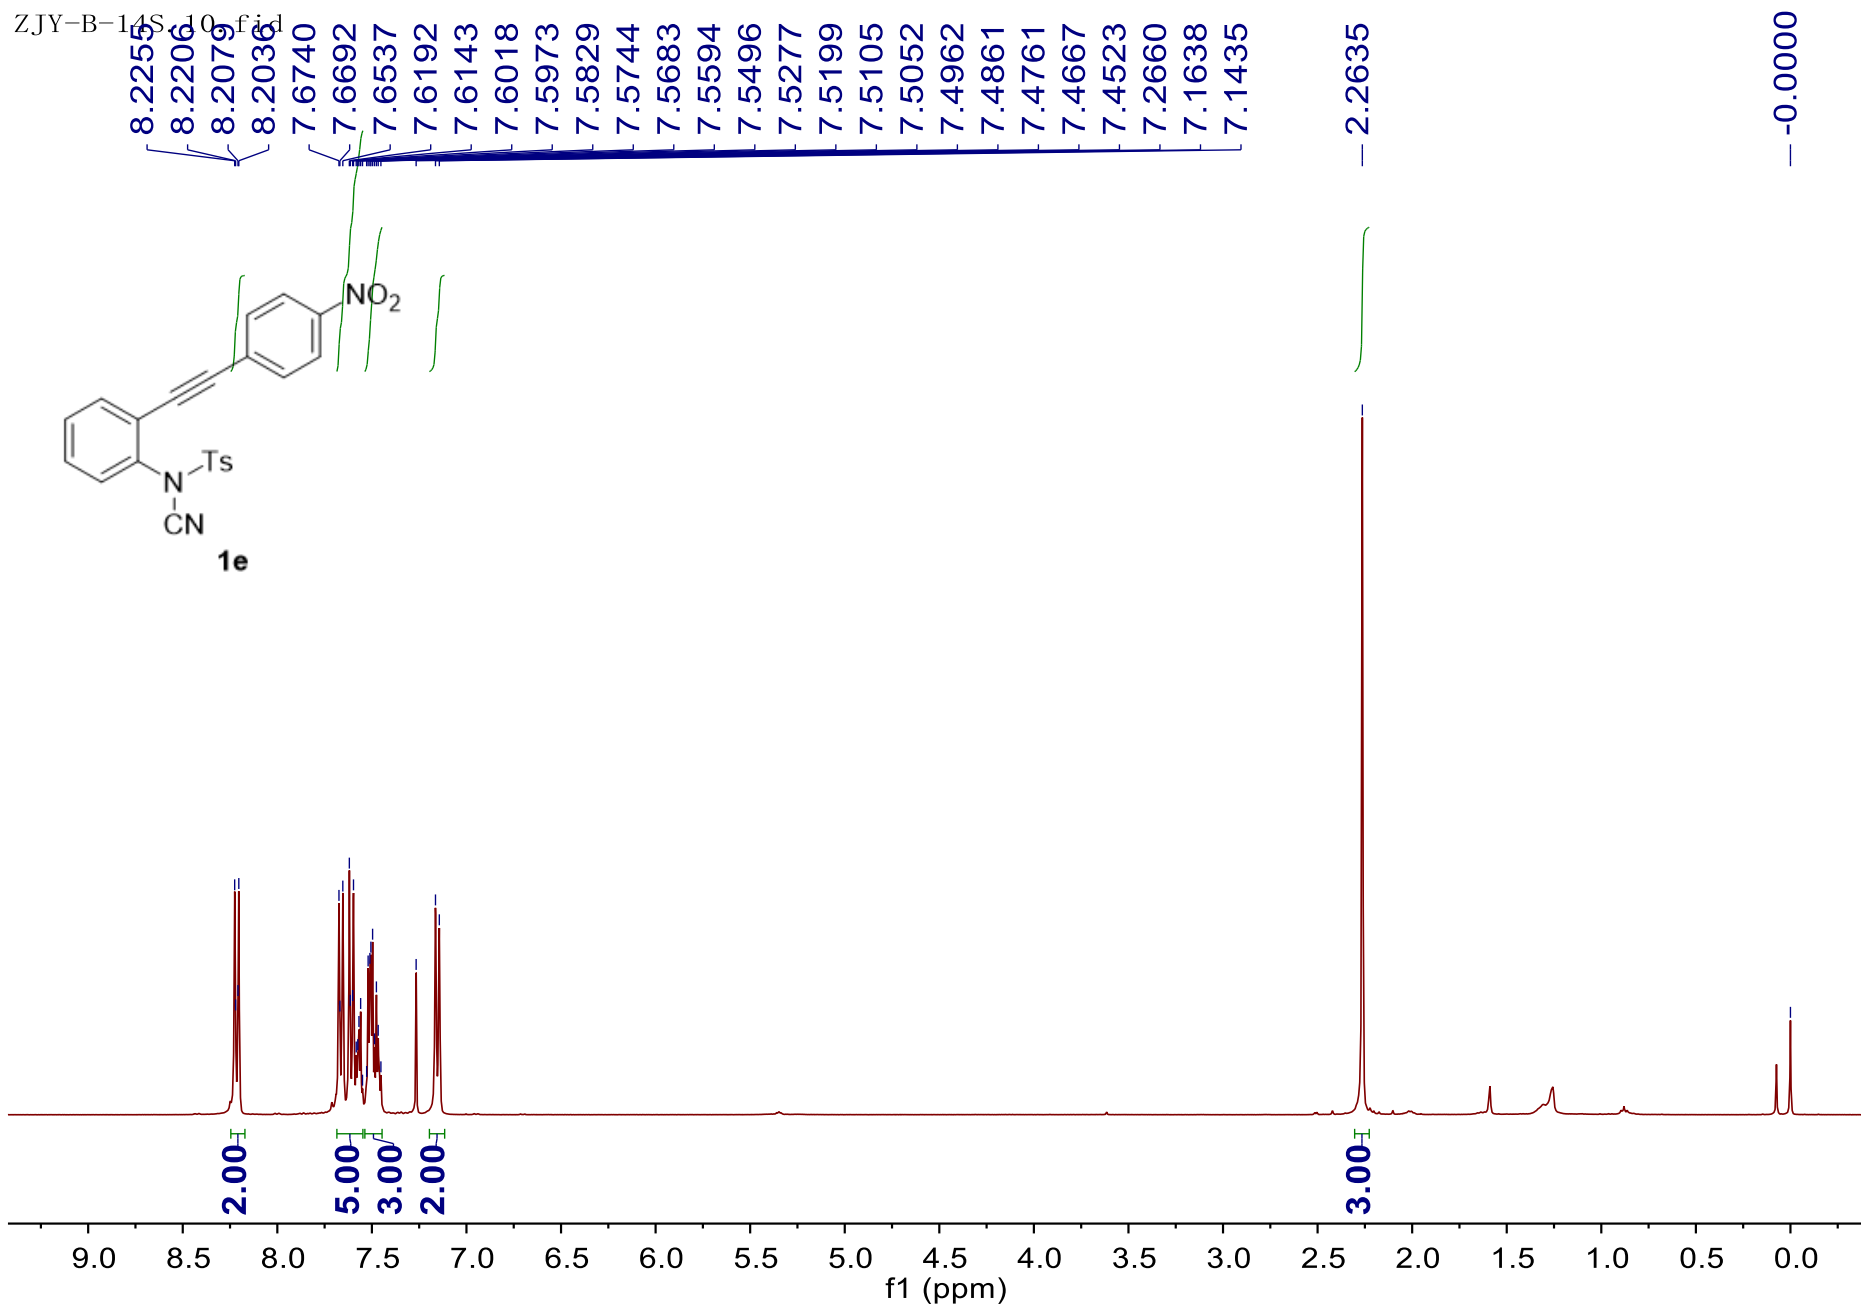

ZJY-3419

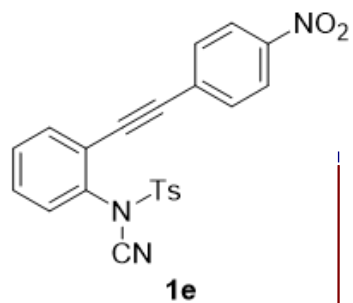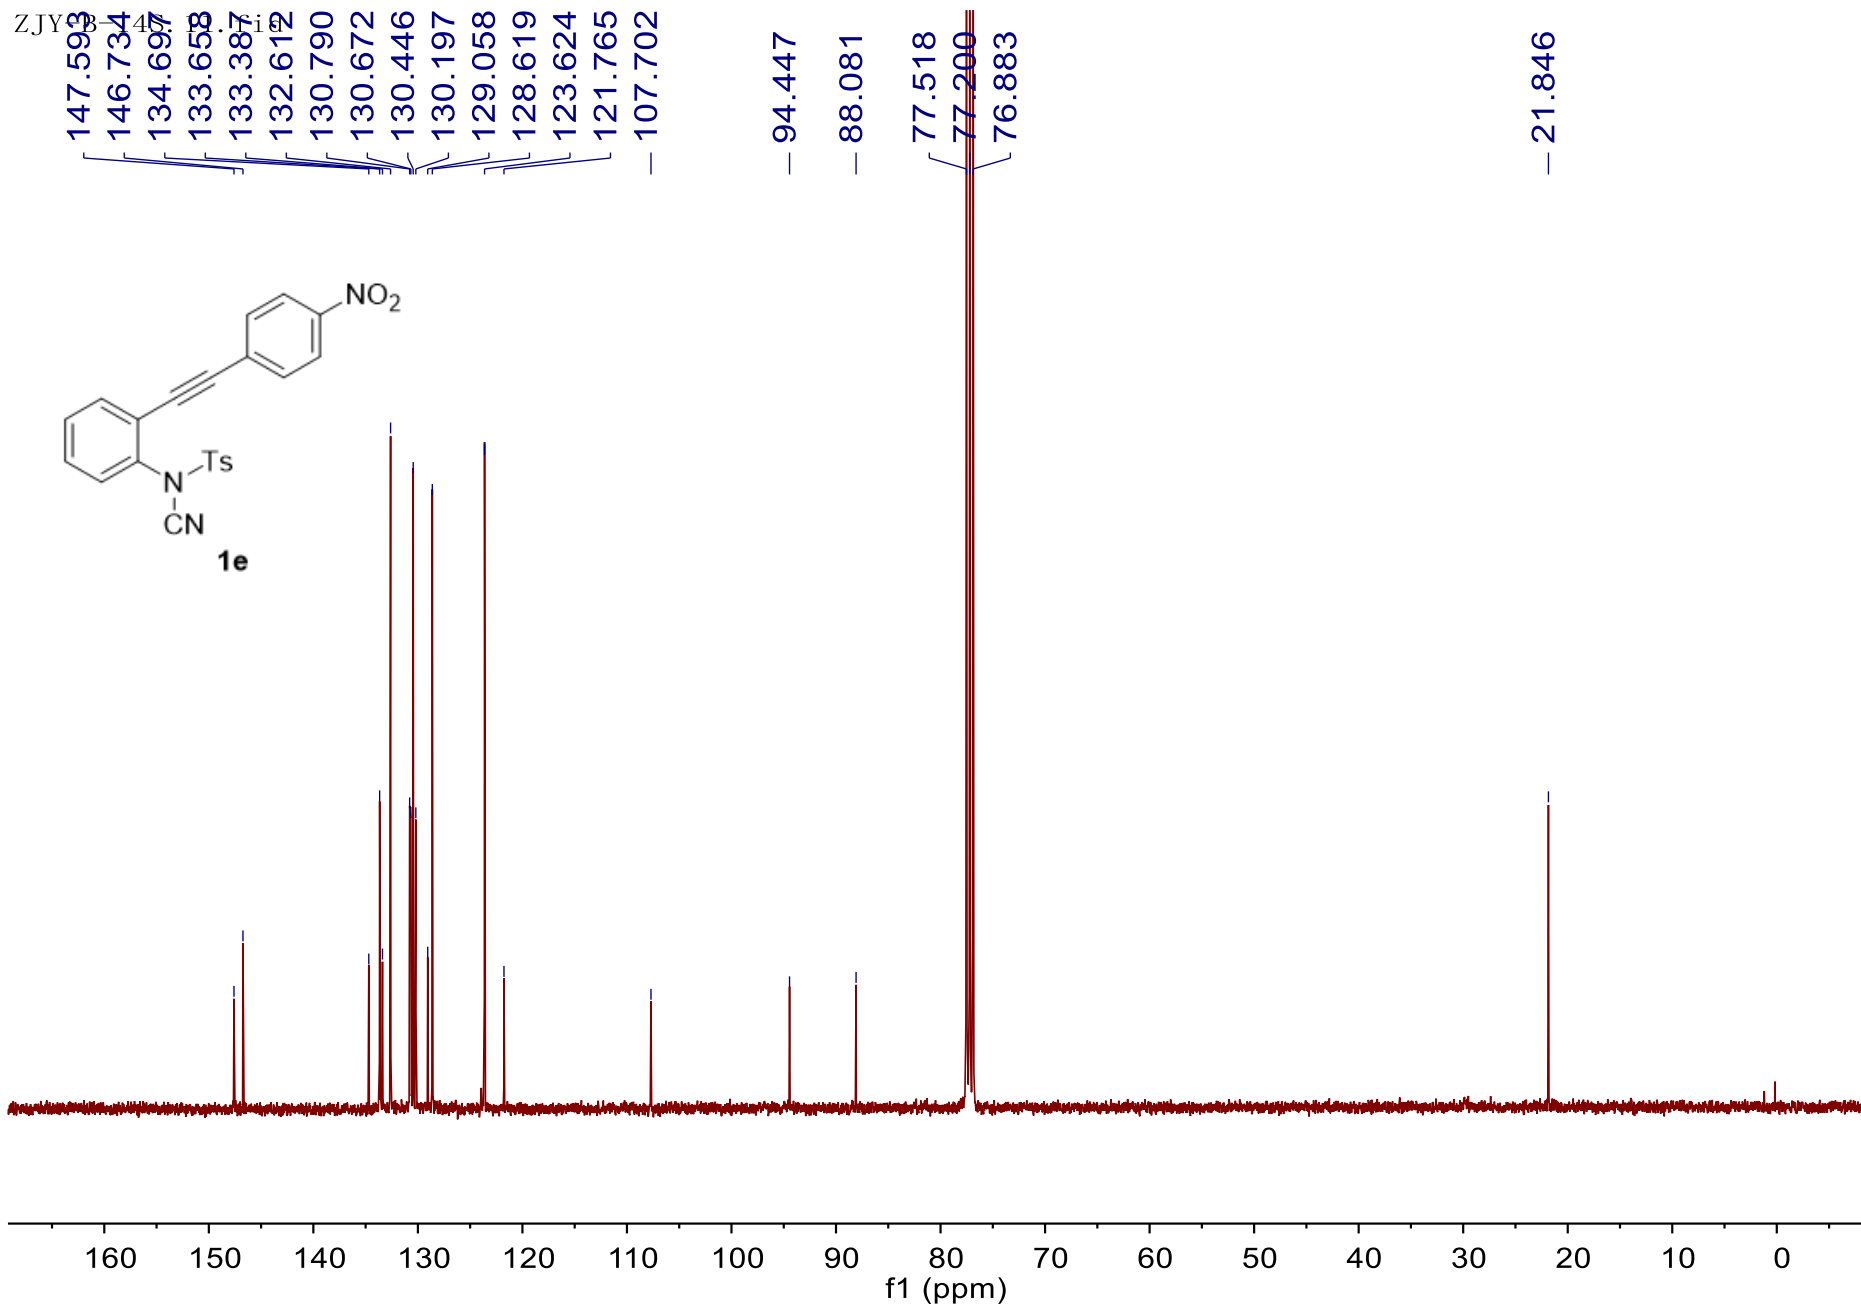

7.6461  
7.6289  
7.6254  
7.5098  
7.5035  
7.5001  
7.4971  
7.4941  
7.4876  
7.4858  
7.4808  
7.4784  
7.4725  
7.4692  
7.4654  
7.4626  
7.4567  
7.4501  
7.4457  
7.4432  
7.4390  
7.4324  
7.4271  
7.4209  
7.3400  
7.3369  
7.3272  
7.3242  
7.2620  
7.2464  
7.2433  
7.2373  
7.2343  
7.1463  
7.1261  
7.0195  
7.0167  
7.0103  
7.0074  
7.0039  
6.9976  
6.9949  
2.2881  
0.0000

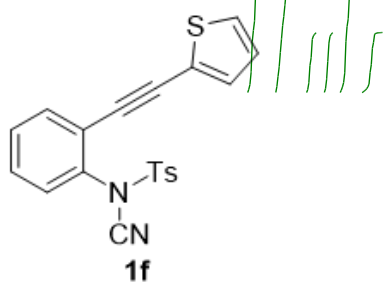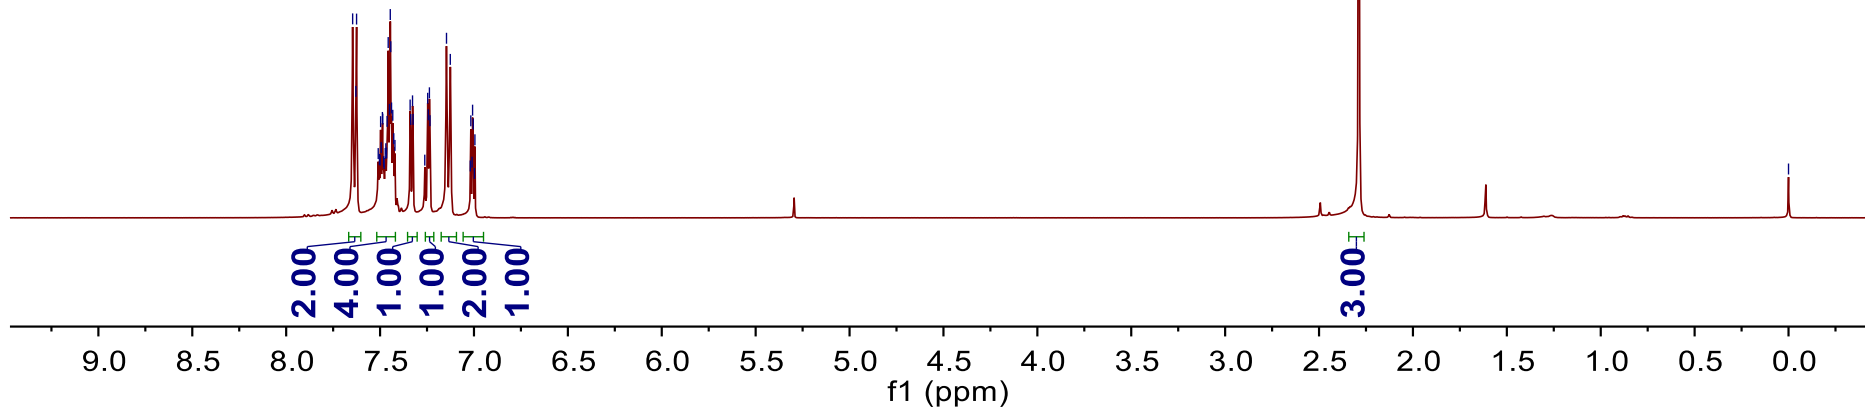

B-23. 1f

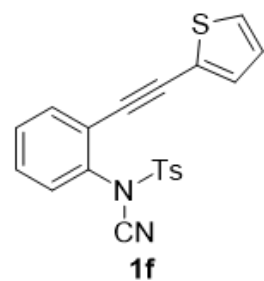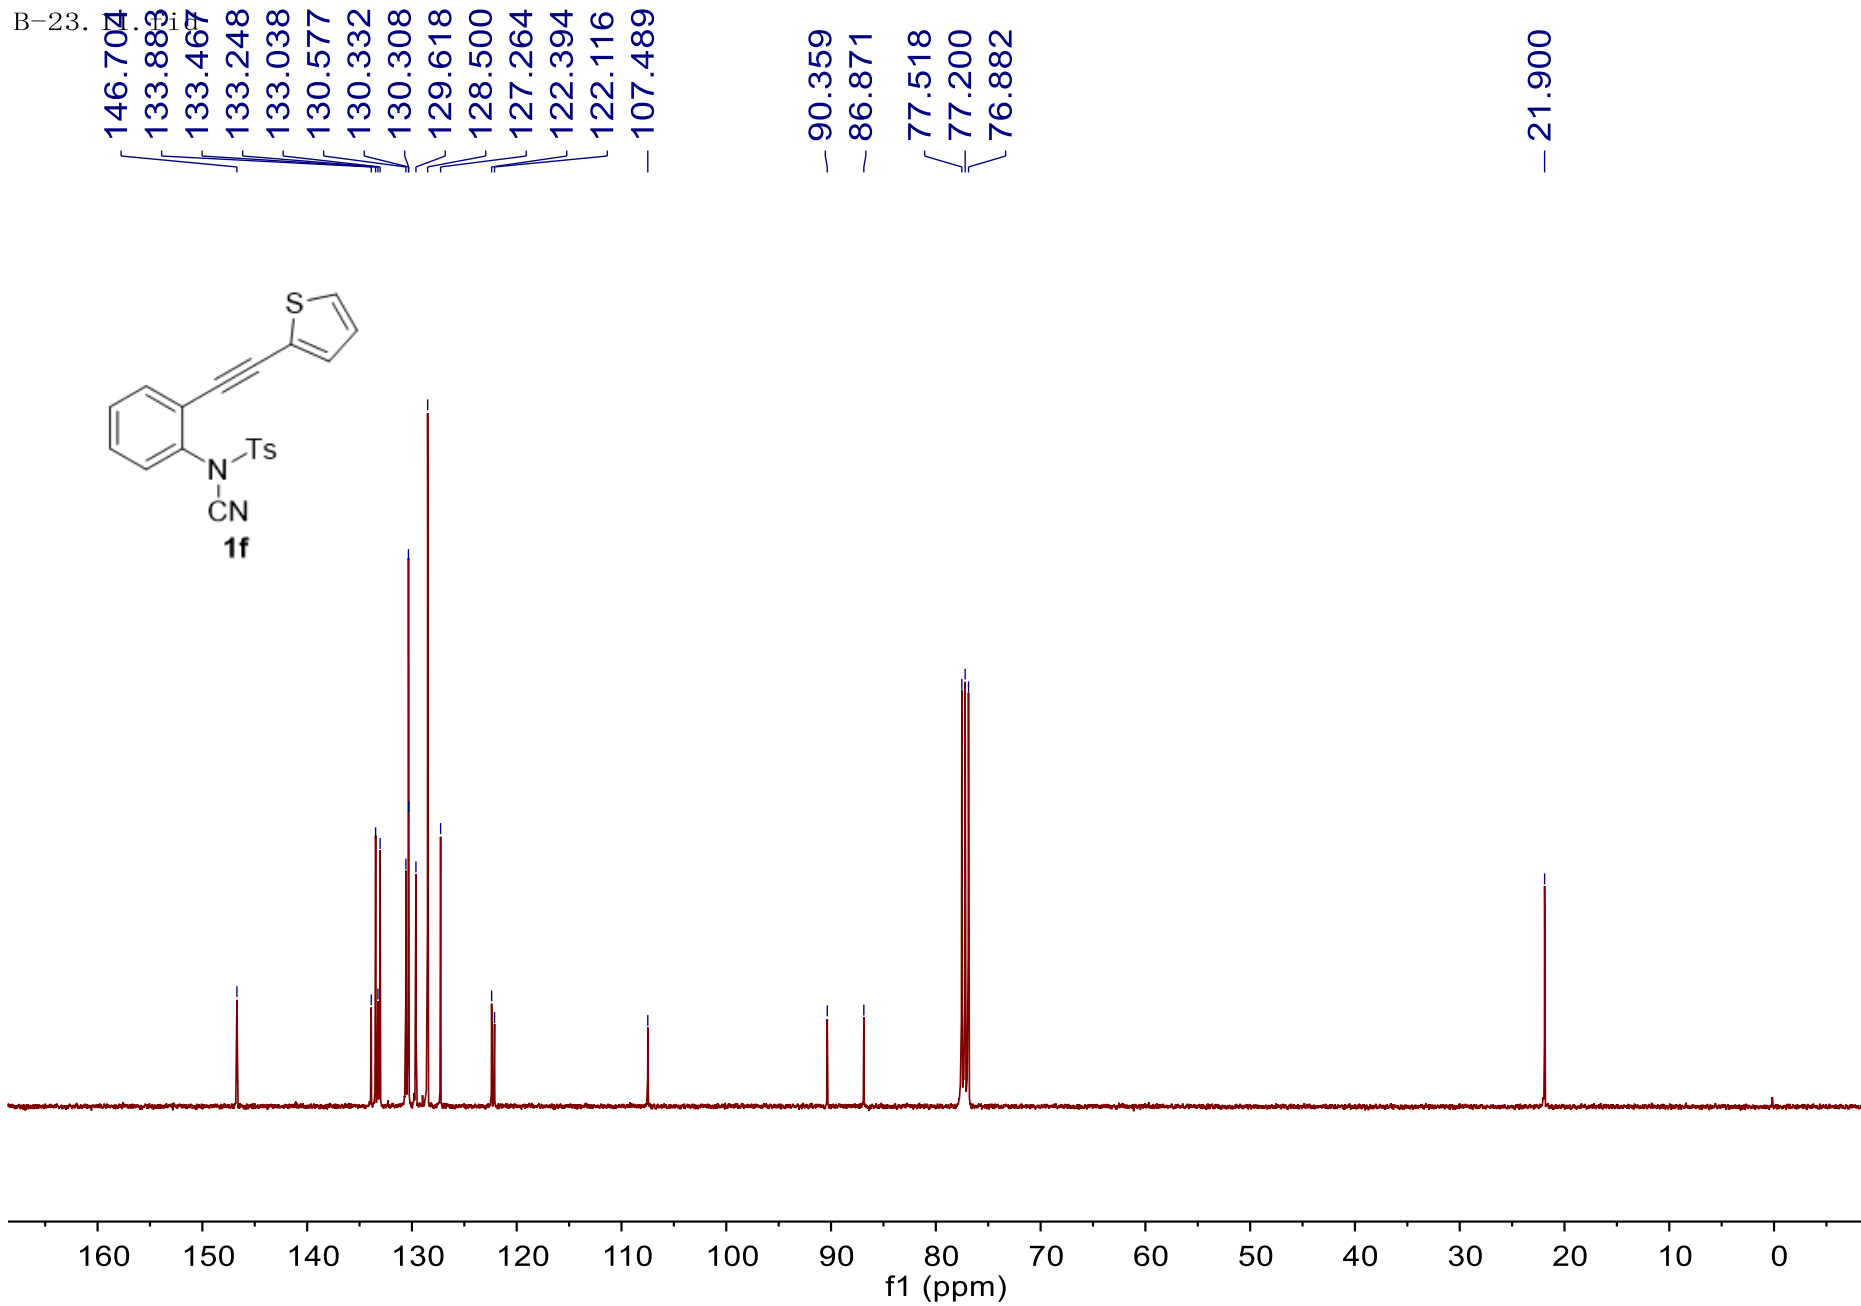

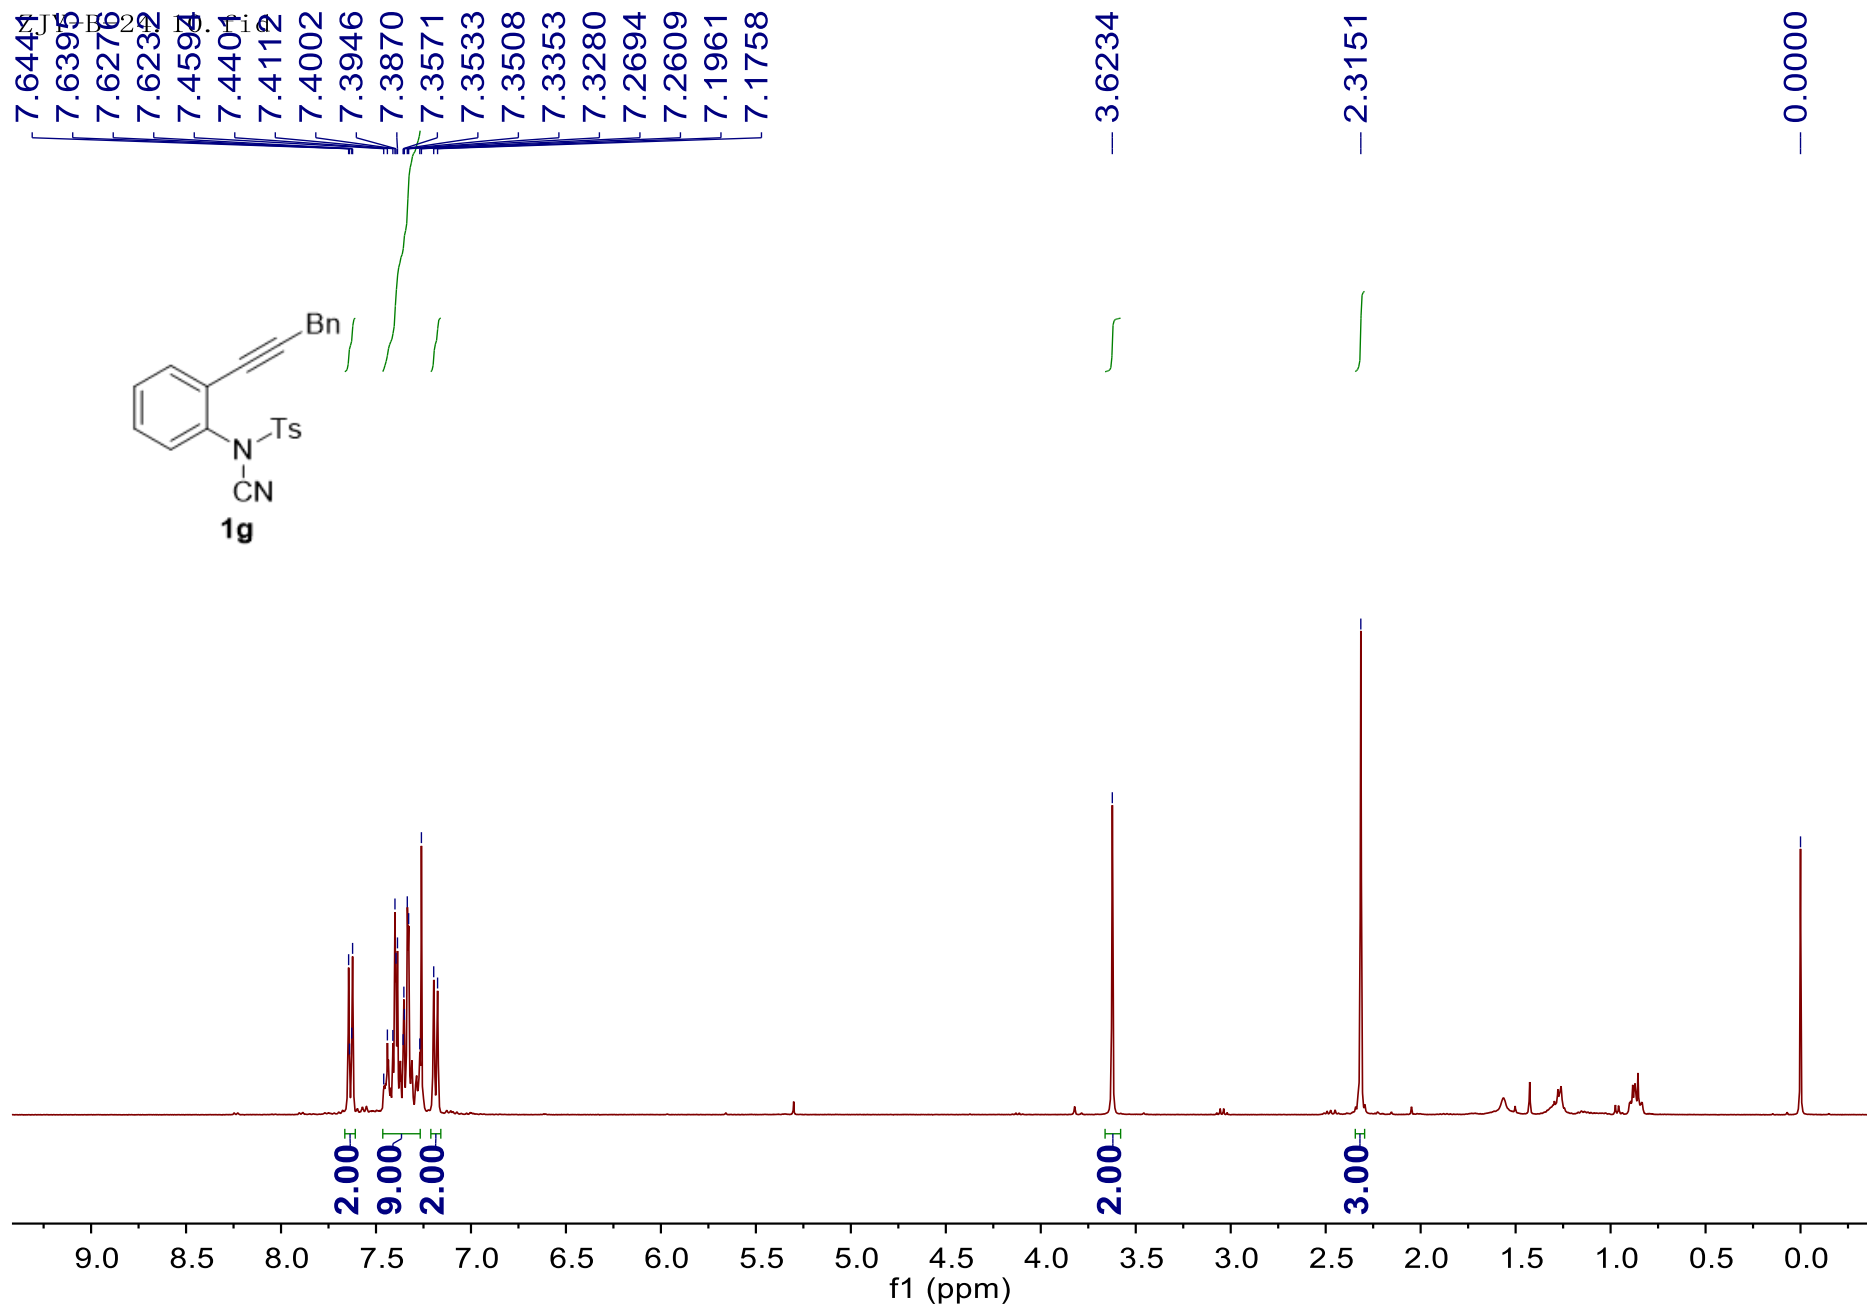



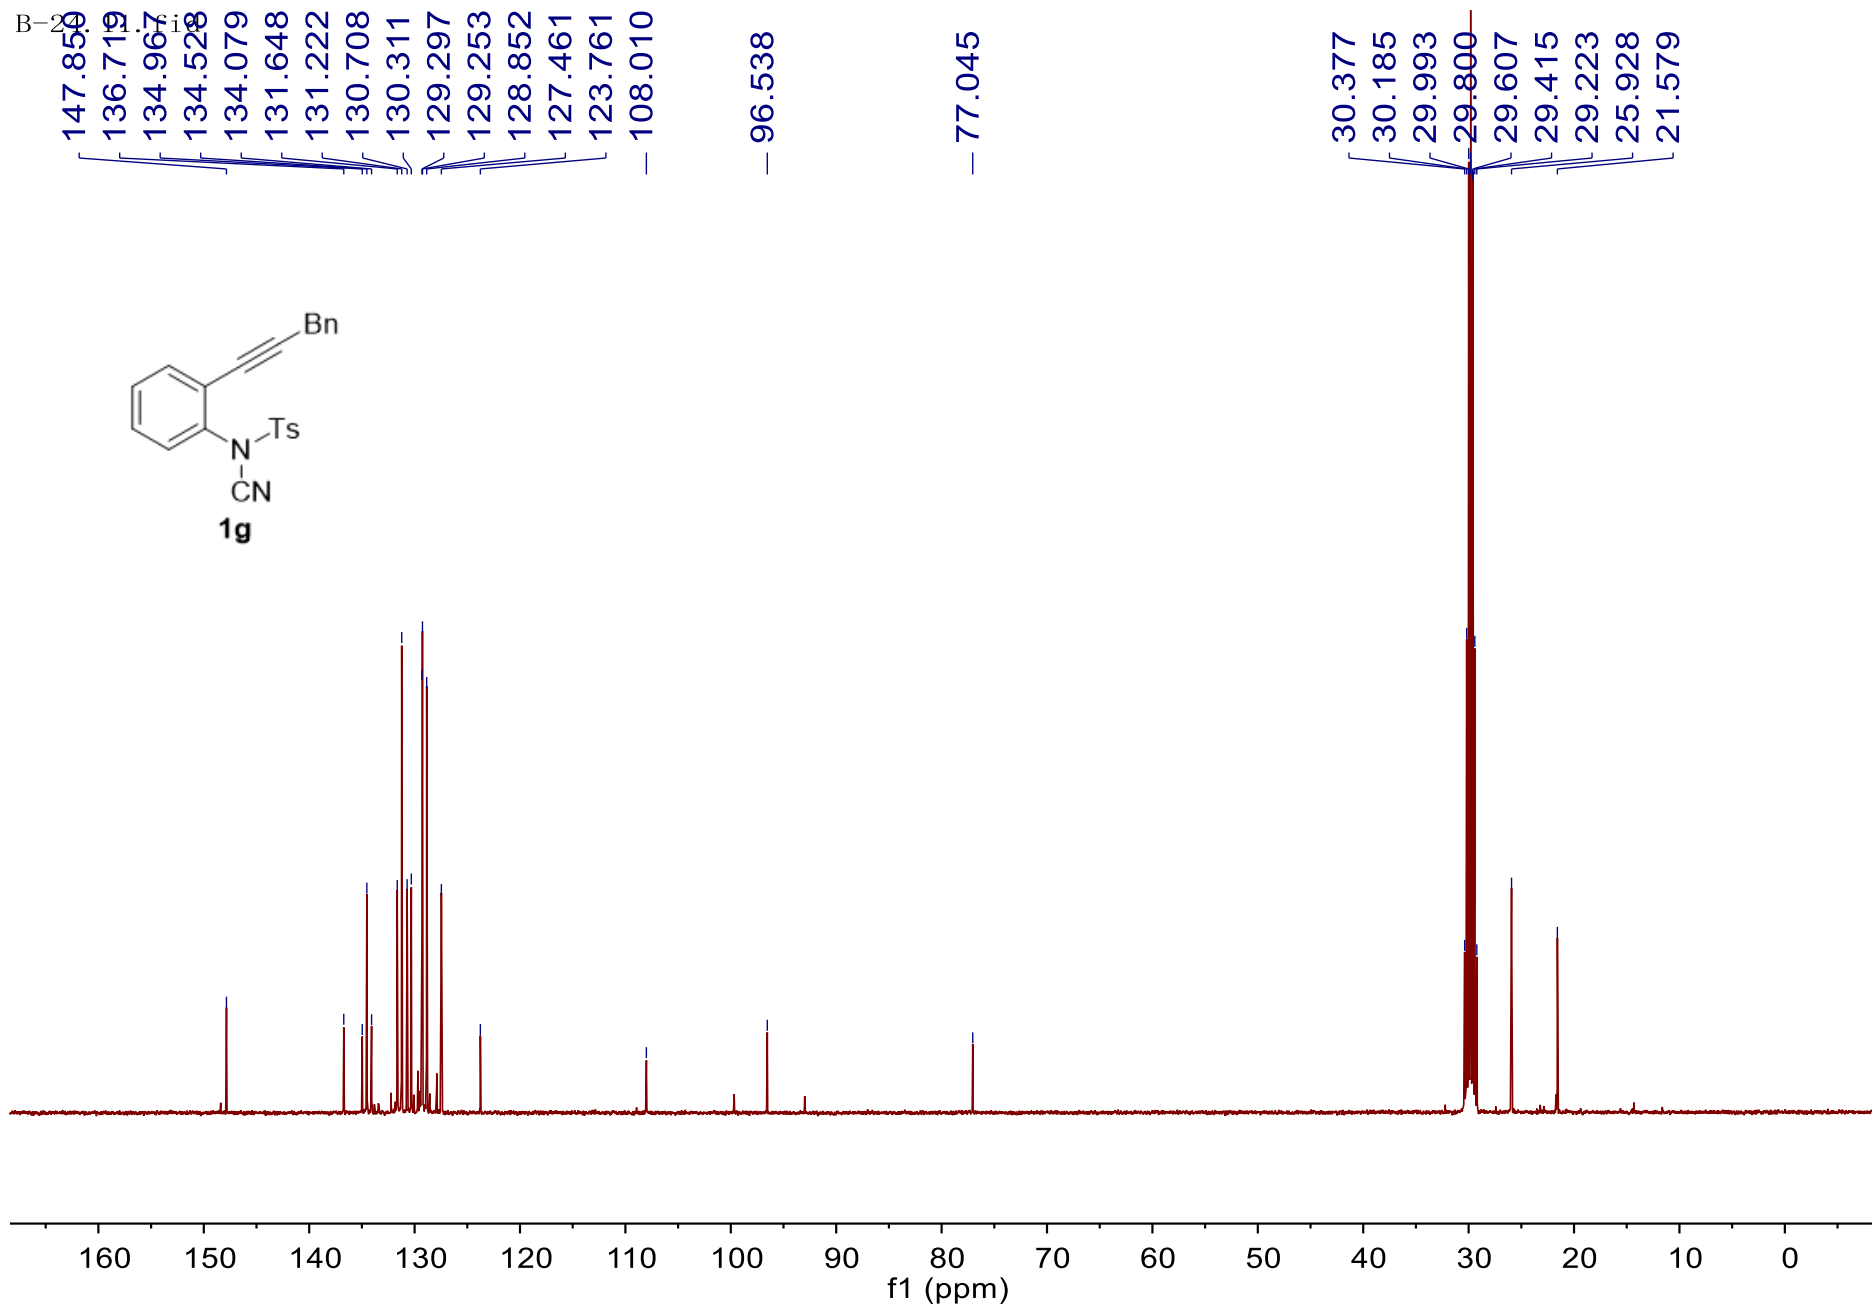

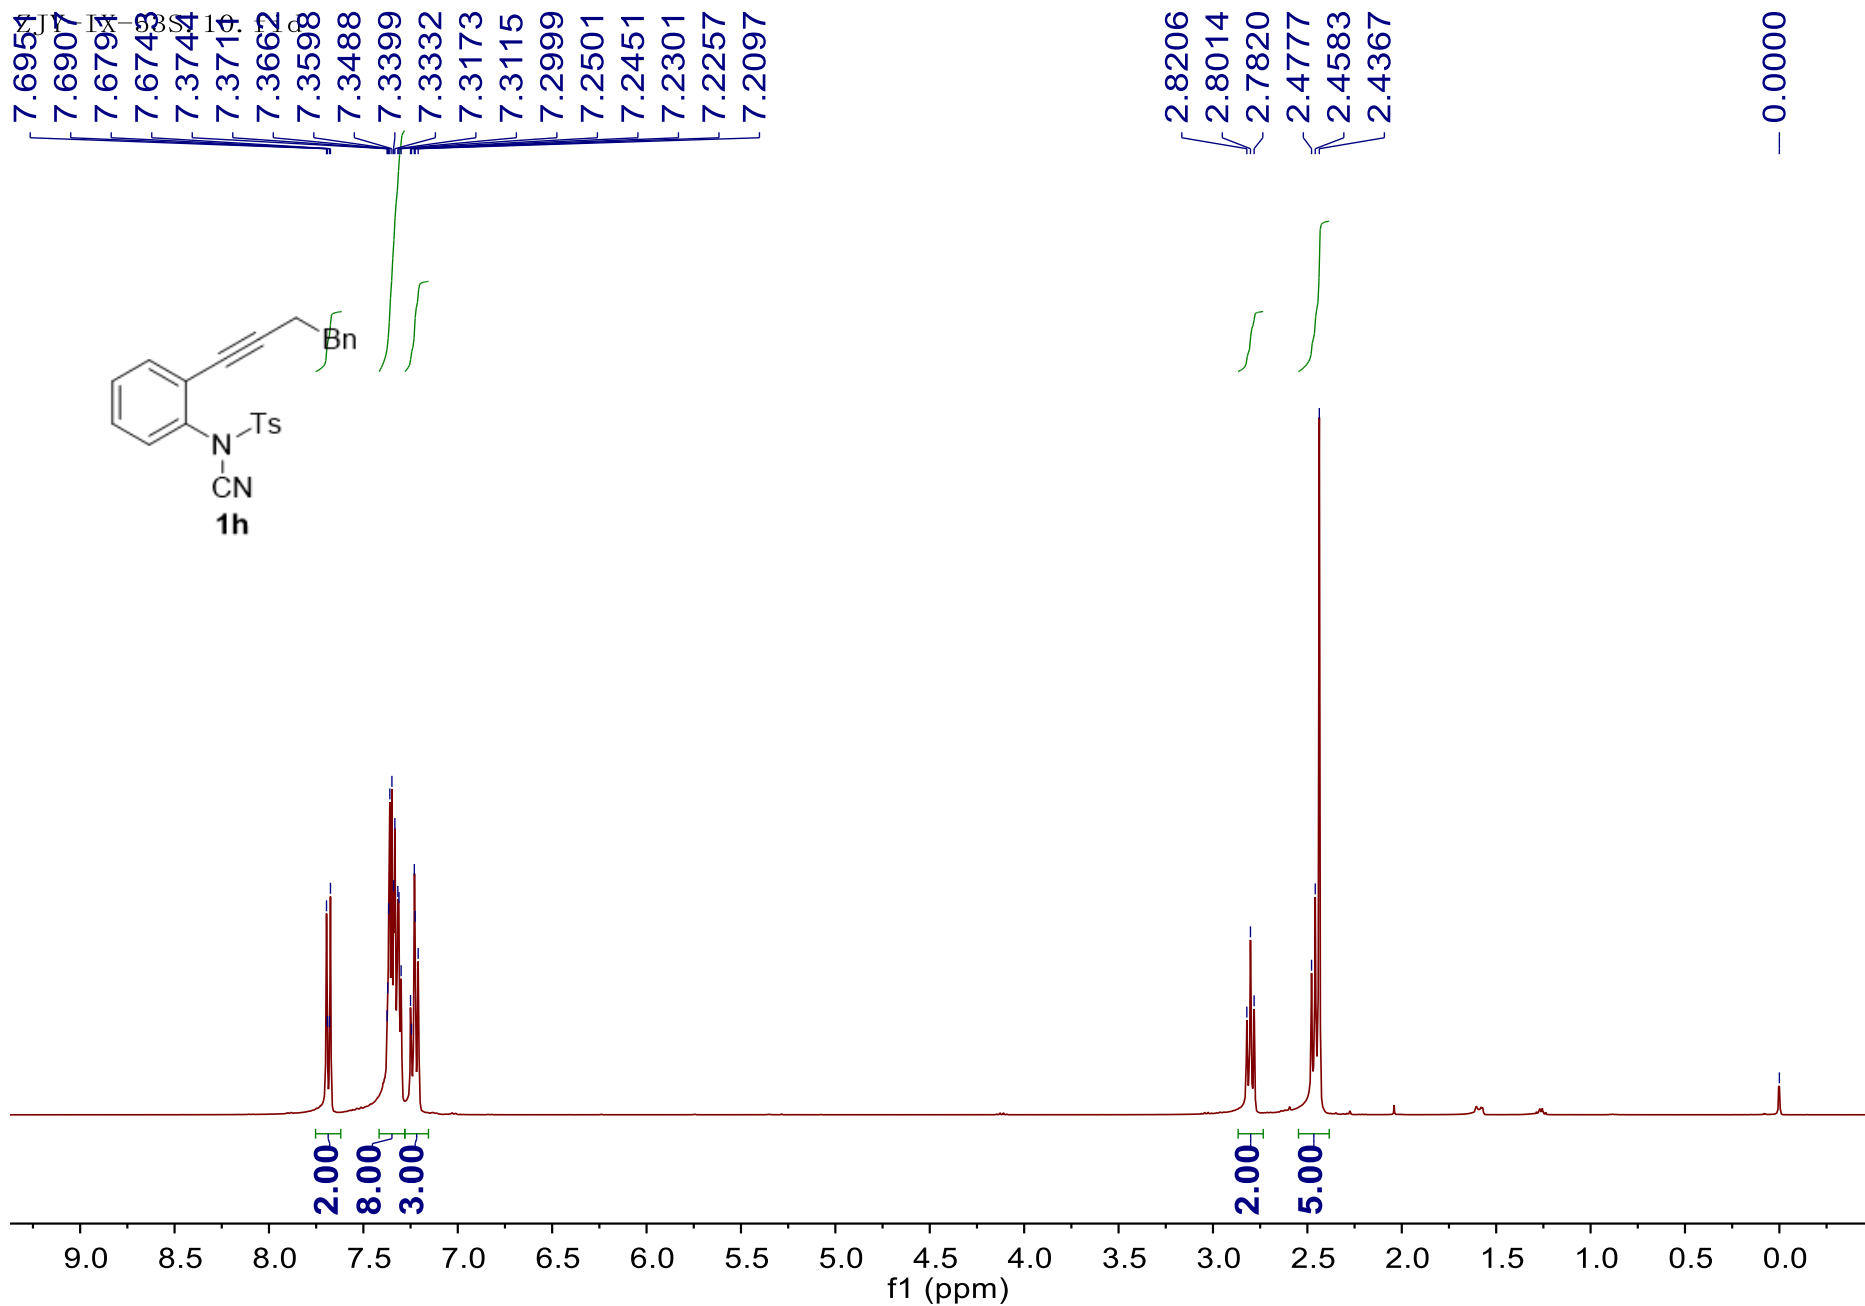

ZJYLX-56S-1.f3d

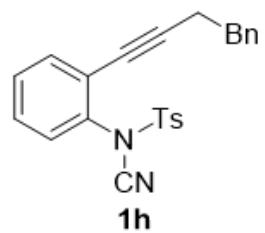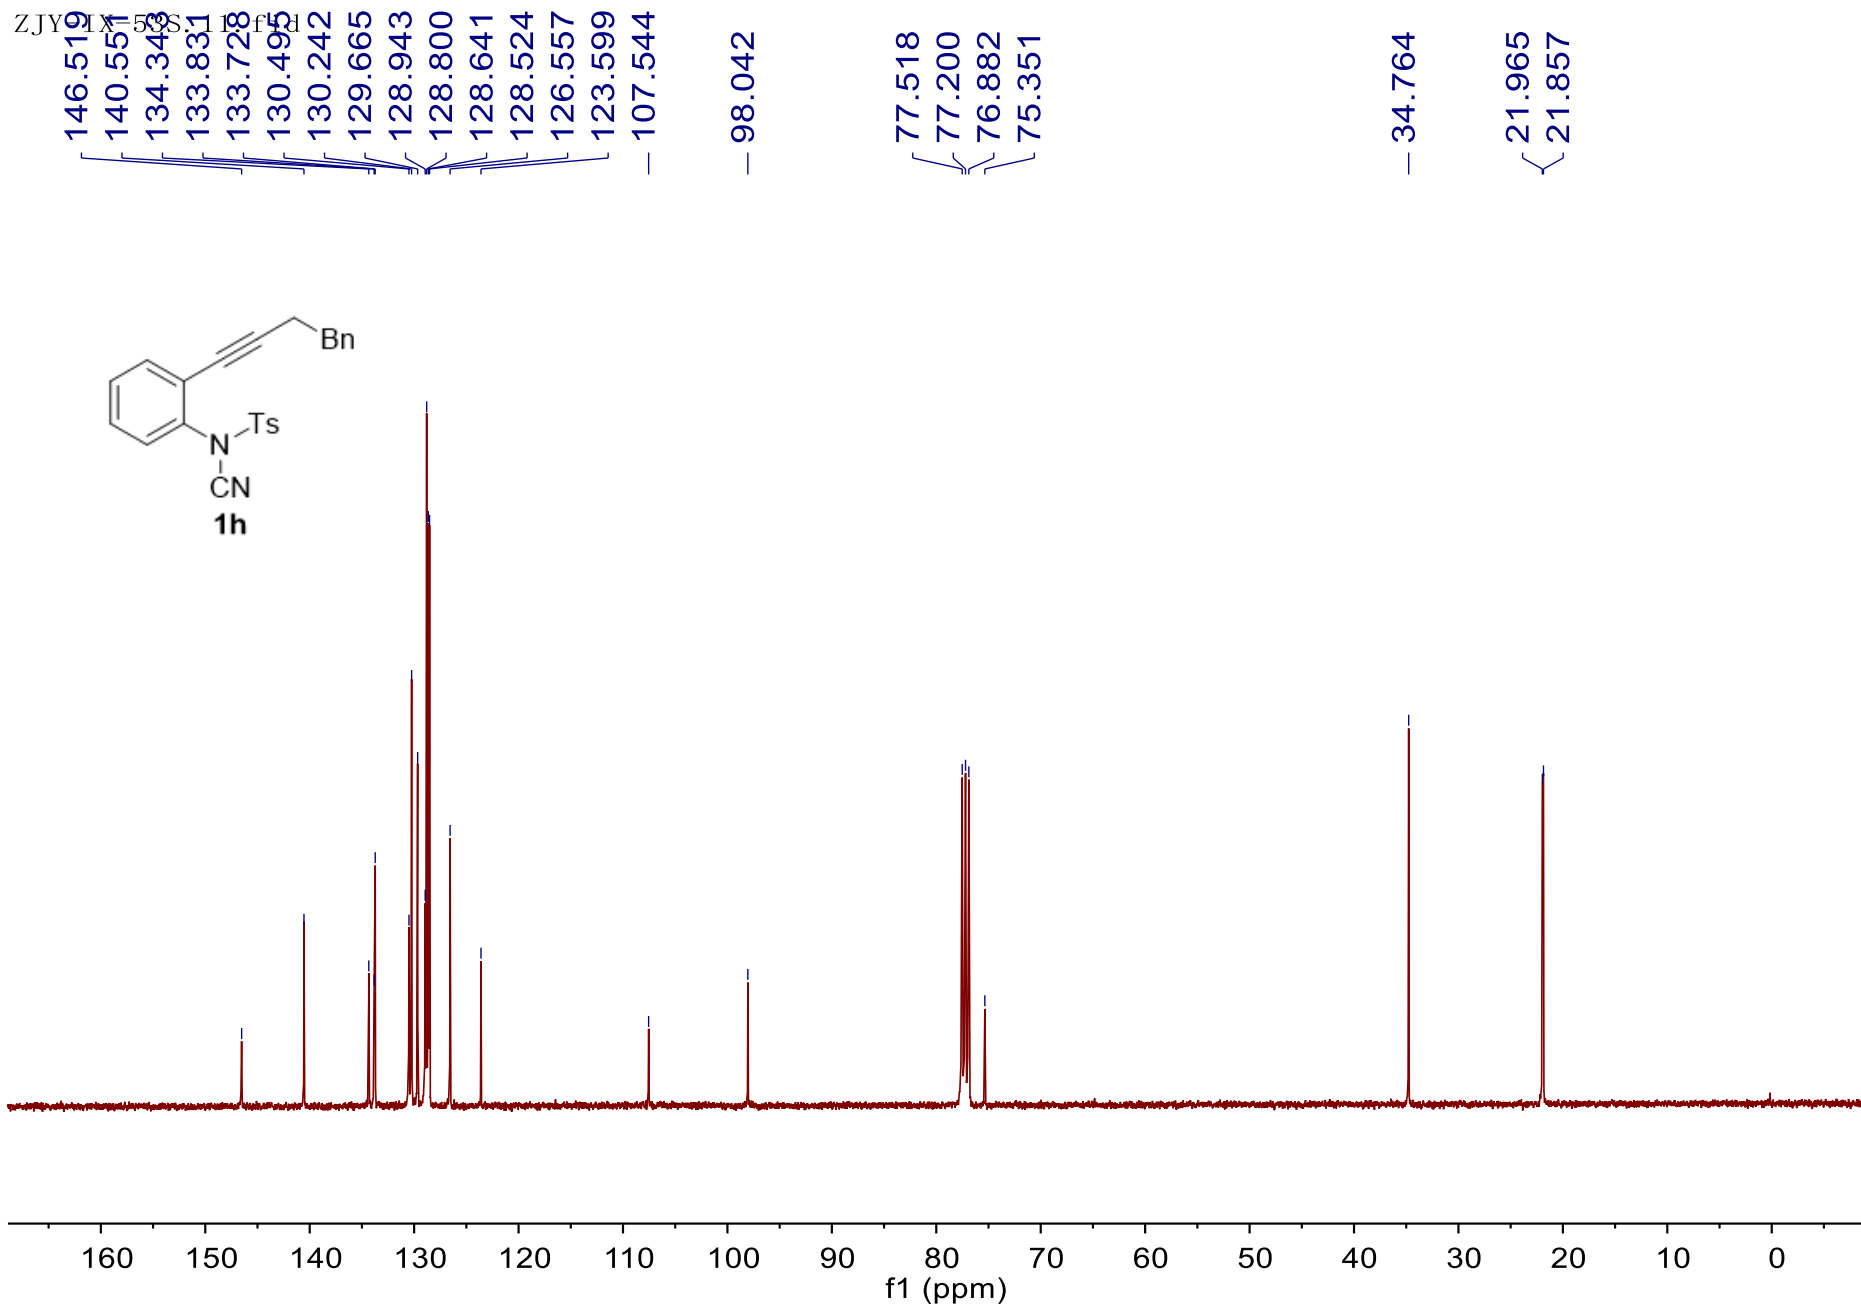

ZJY-IX-50S-10.fid

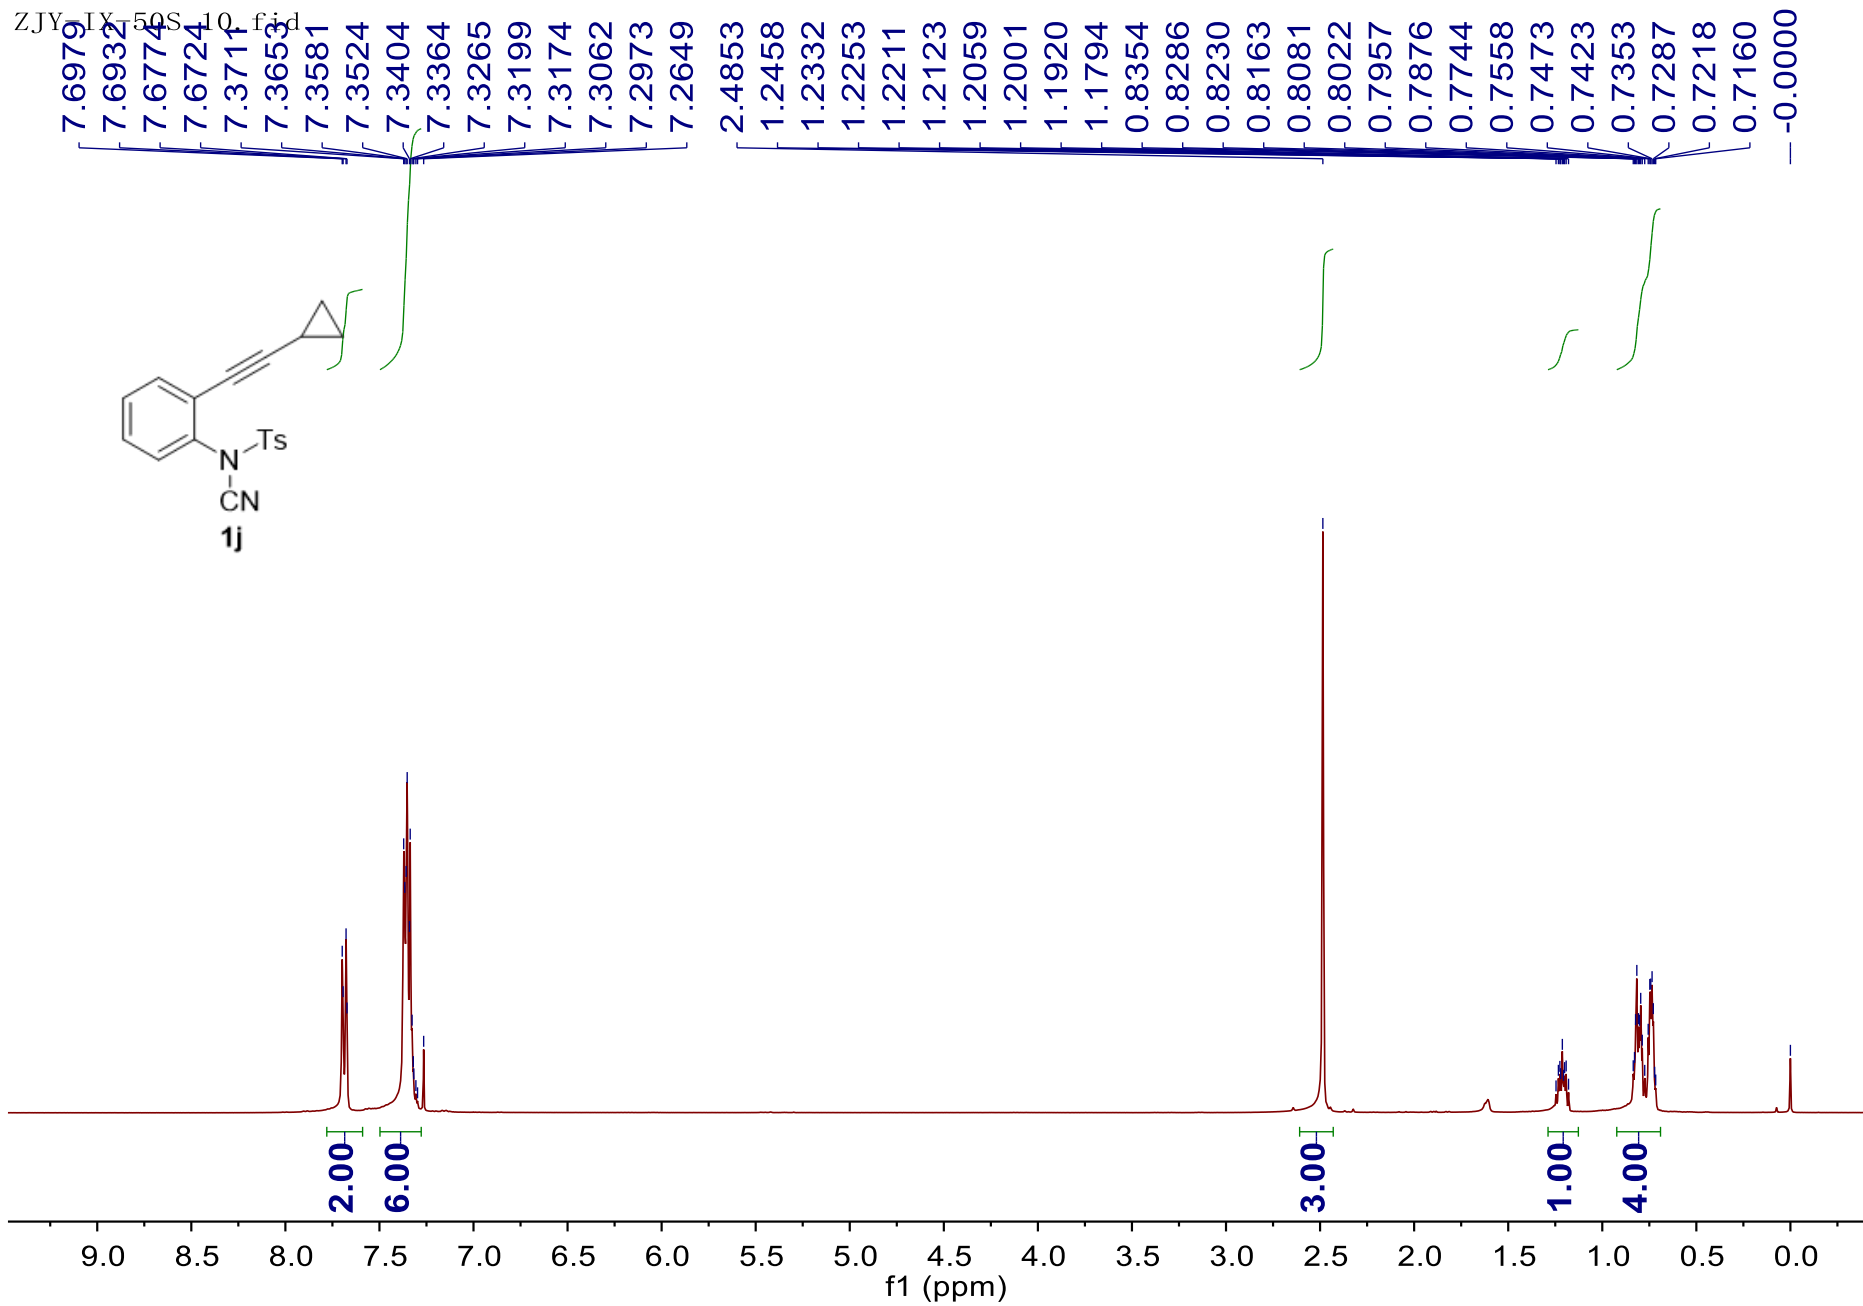

ZJY-IX-50S. 111f1

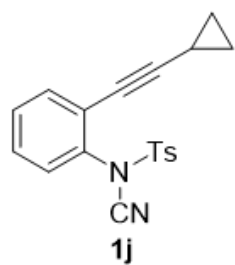

— 146.500  
— 134.280  
— 133.738  
— 133.529  
— 130.392  
— 130.301  
— 129.637  
— 128.710  
— 128.583  
— 123.676  
— 107.391  
— 102.159

77.519  
77.200  
76.884  
69.854

— 21.996

— 8.980

— 0.437

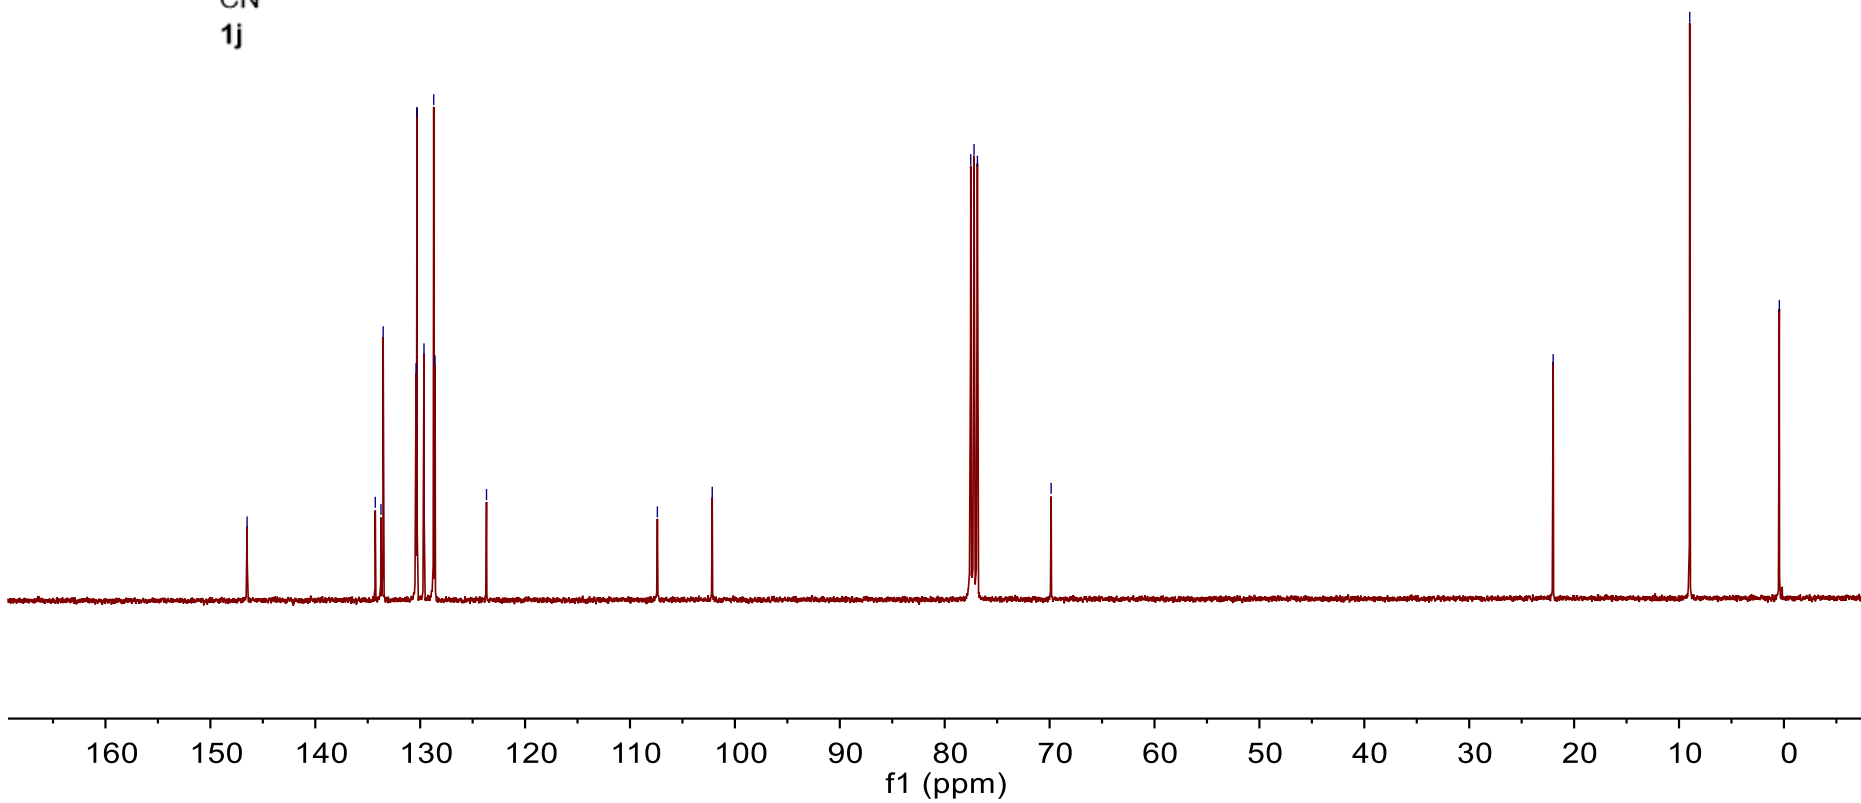

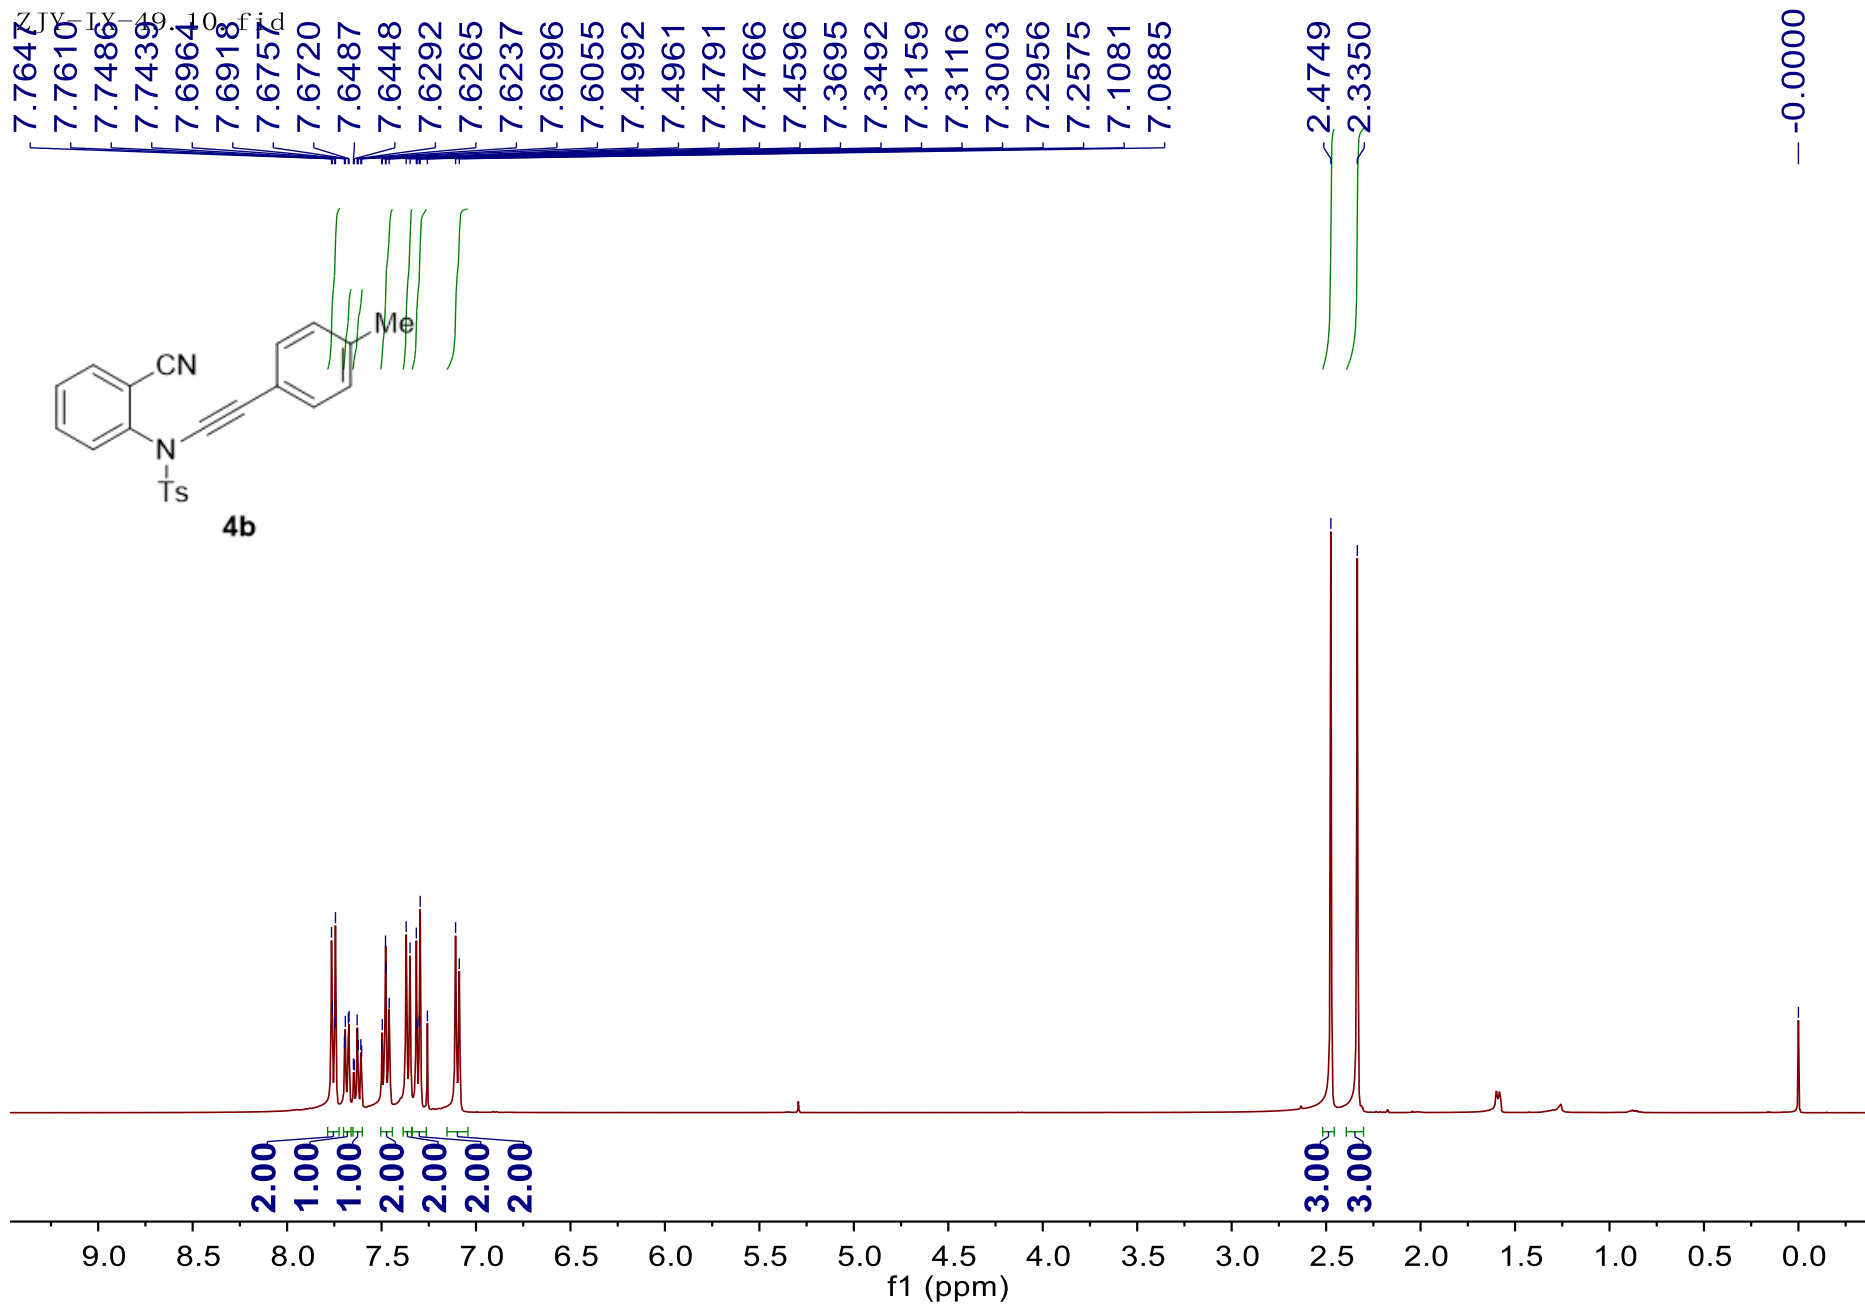

145.939  
140.827  
138.913  
134.343  
133.710  
132.865  
132.248  
130.041  
129.780  
129.434  
129.226  
128.860  
~ 119.011  
~ 115.409  
~ 112.936

81.033  
77.518  
77.200  
76.883  
71.519

21.984  
21.670

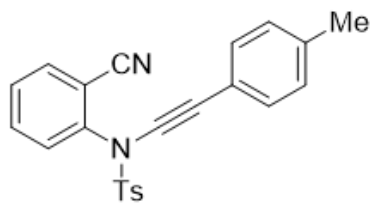

**4b**

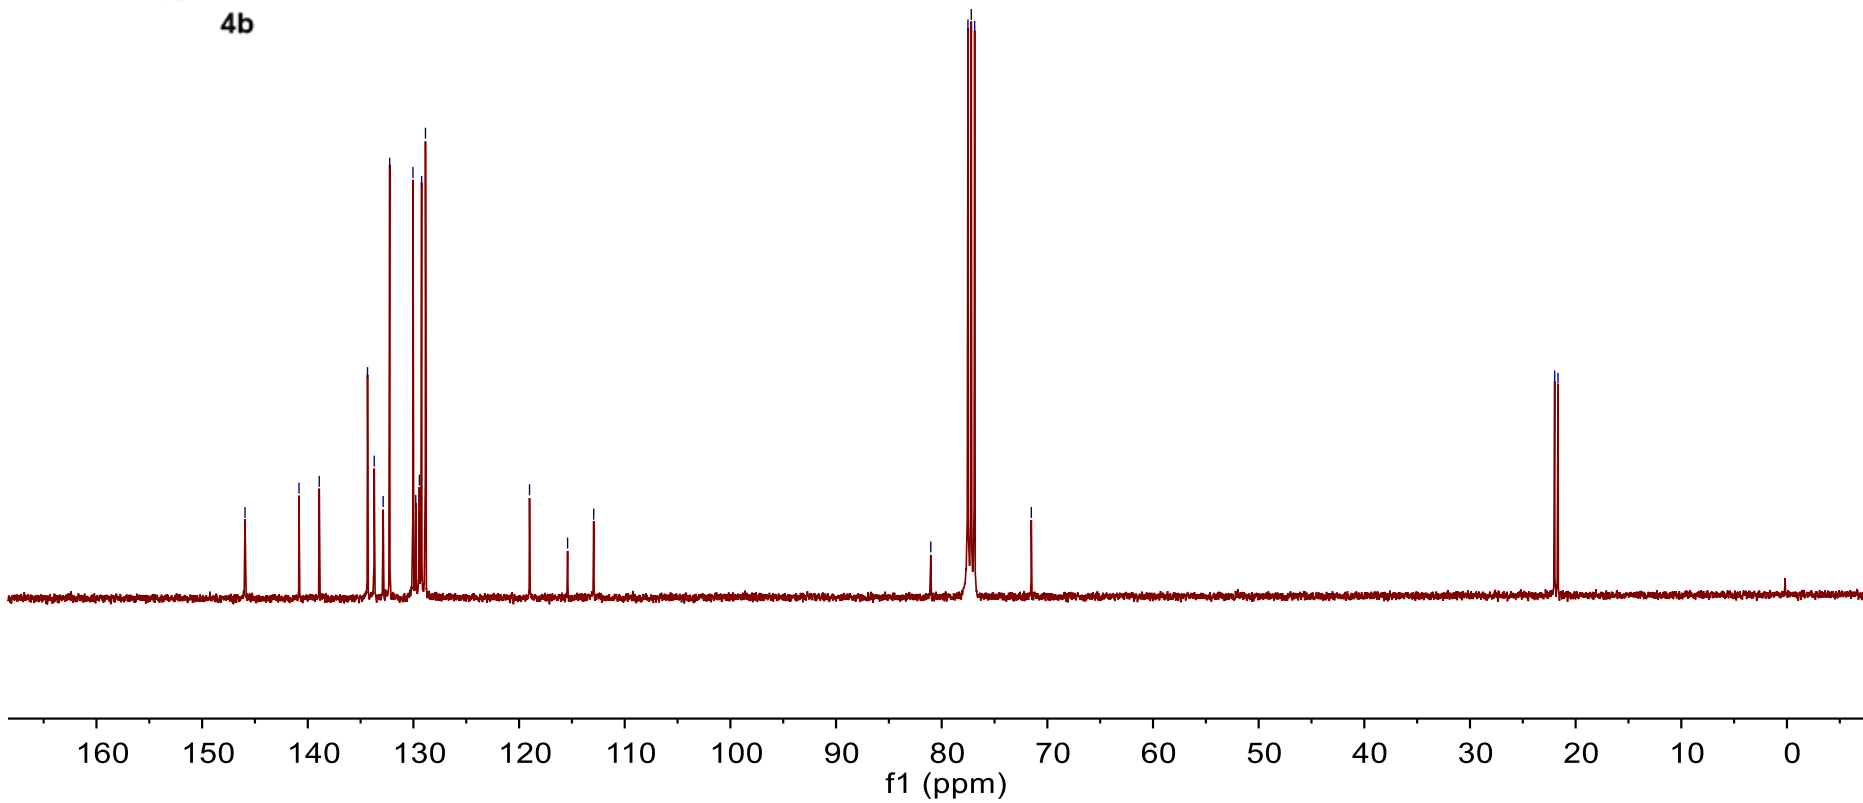

ZJY-F-10.fid

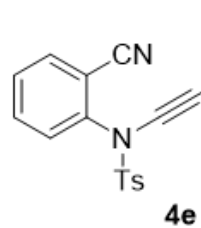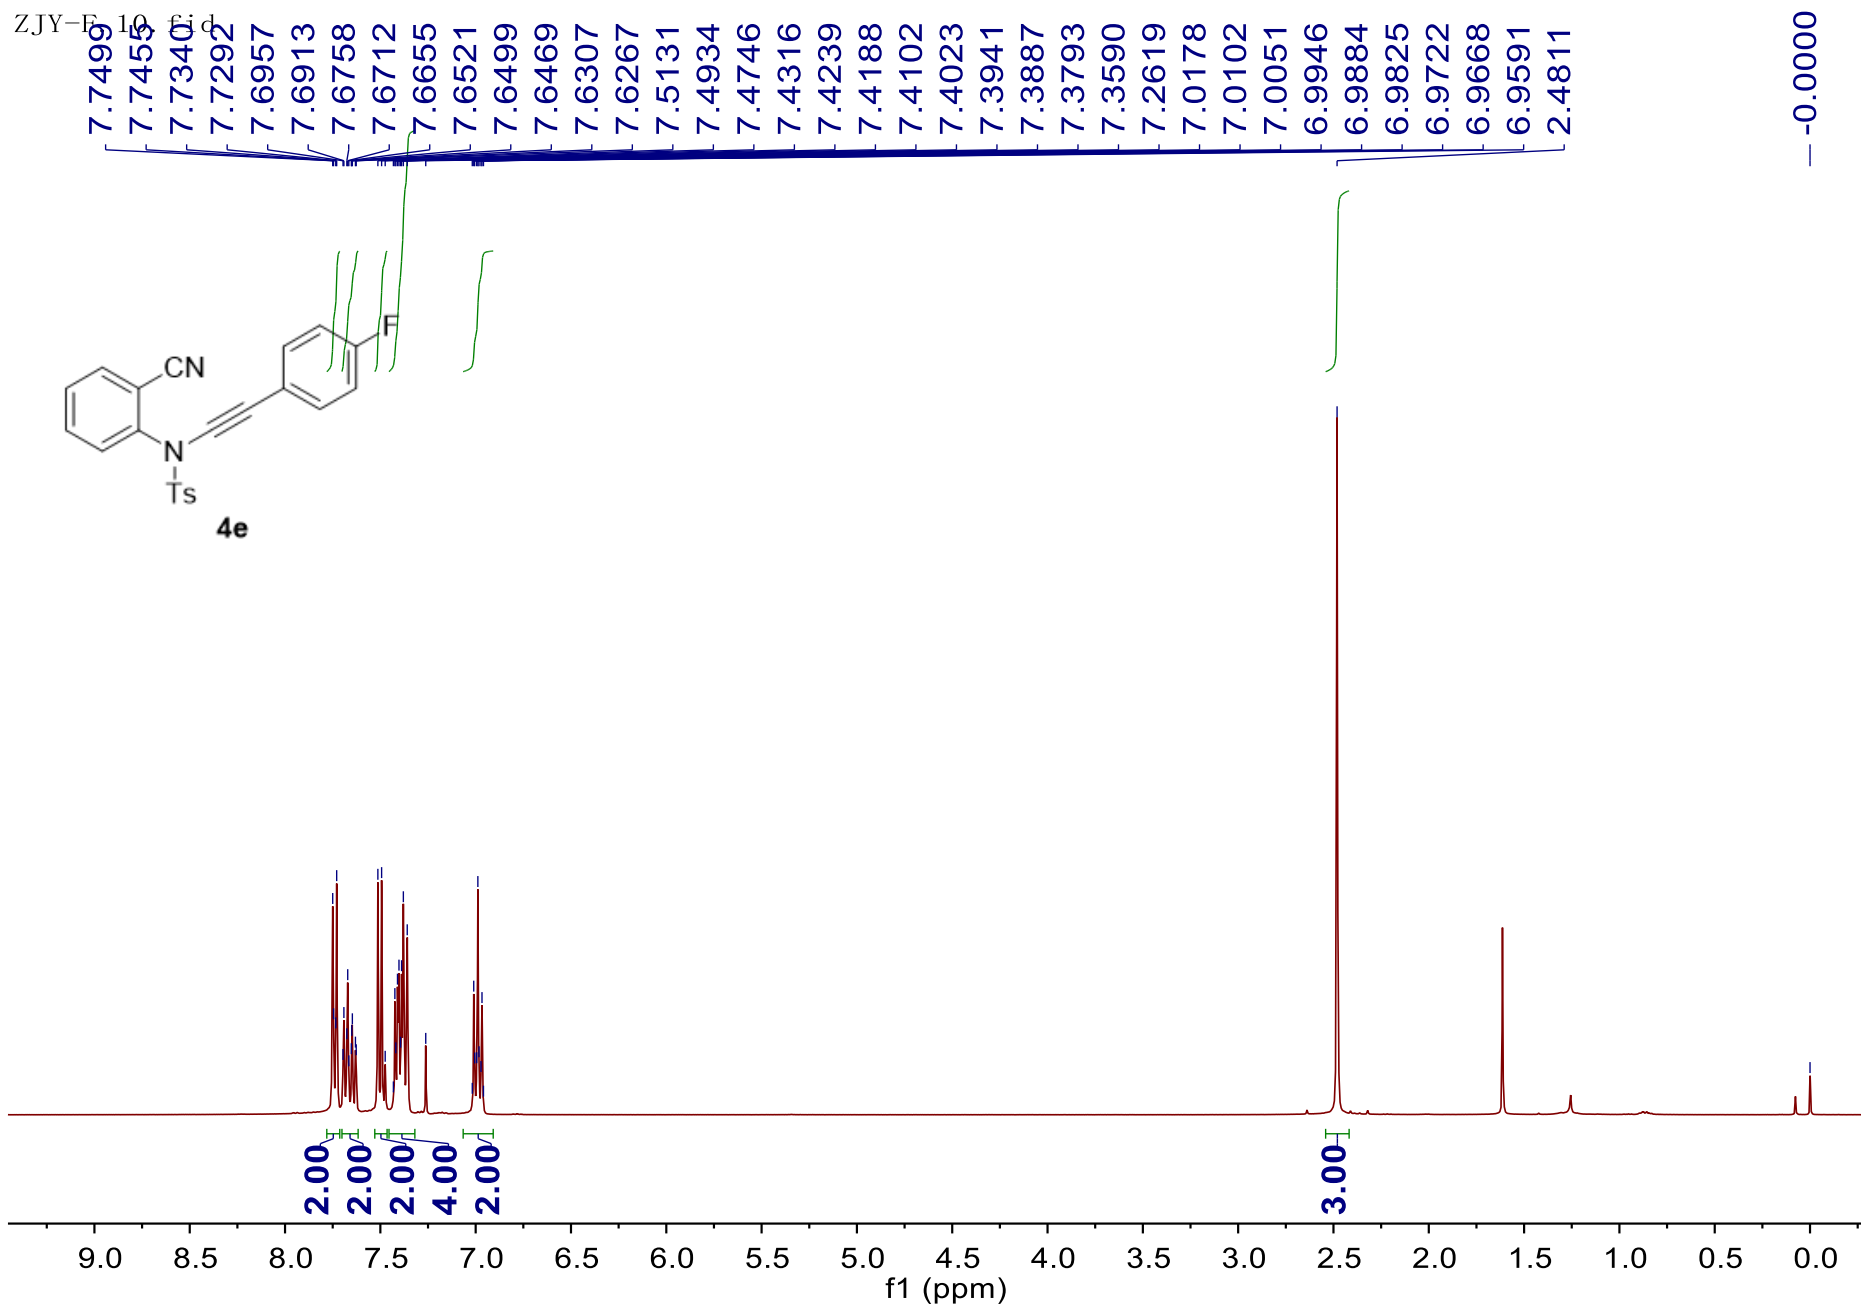



164.090  
161.606  
146.087  
140.562  
134.392  
134.313  
133.783  
132.853  
130.112  
129.921  
129.541  
128.752  
118.202  
115.873  
115.654  
115.286  
112.709

81.256  
77.518  
77.200  
76.883  
70.450

21.978

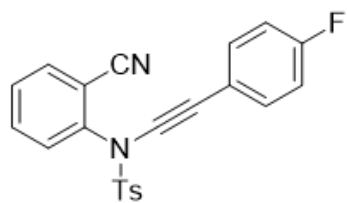

**4e**

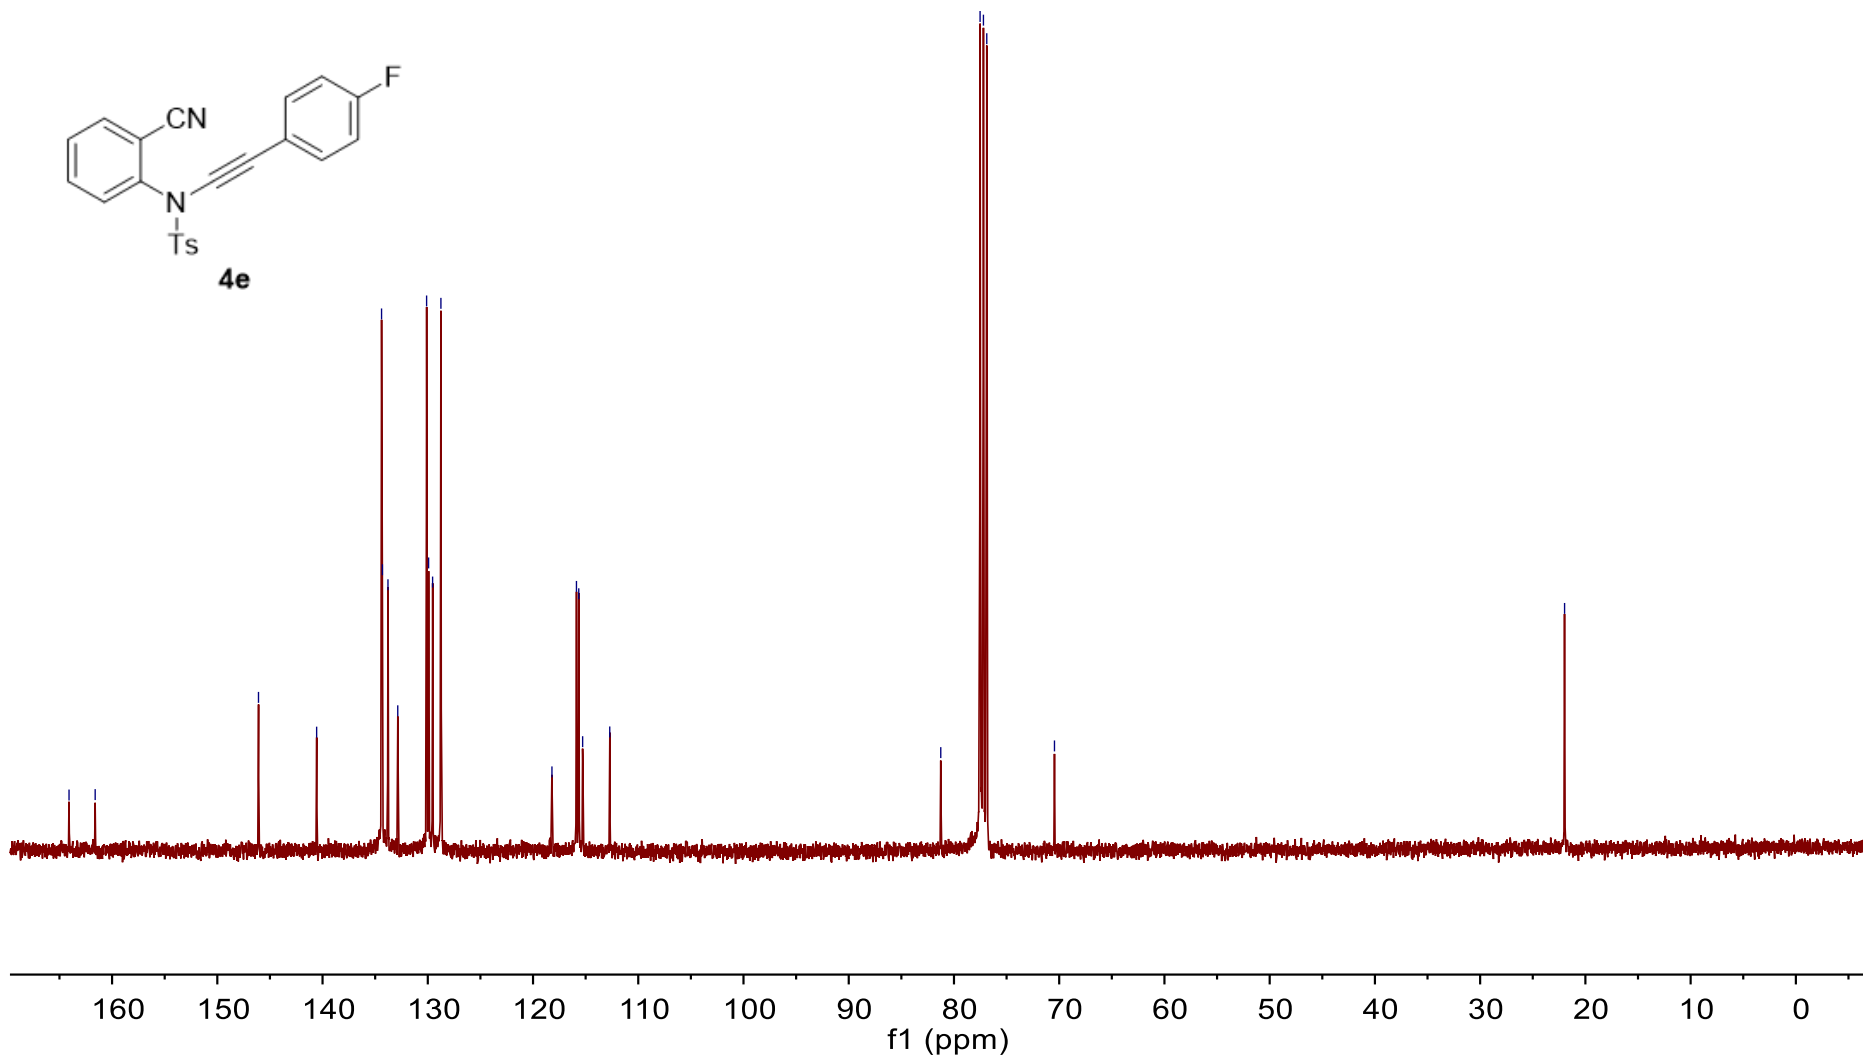

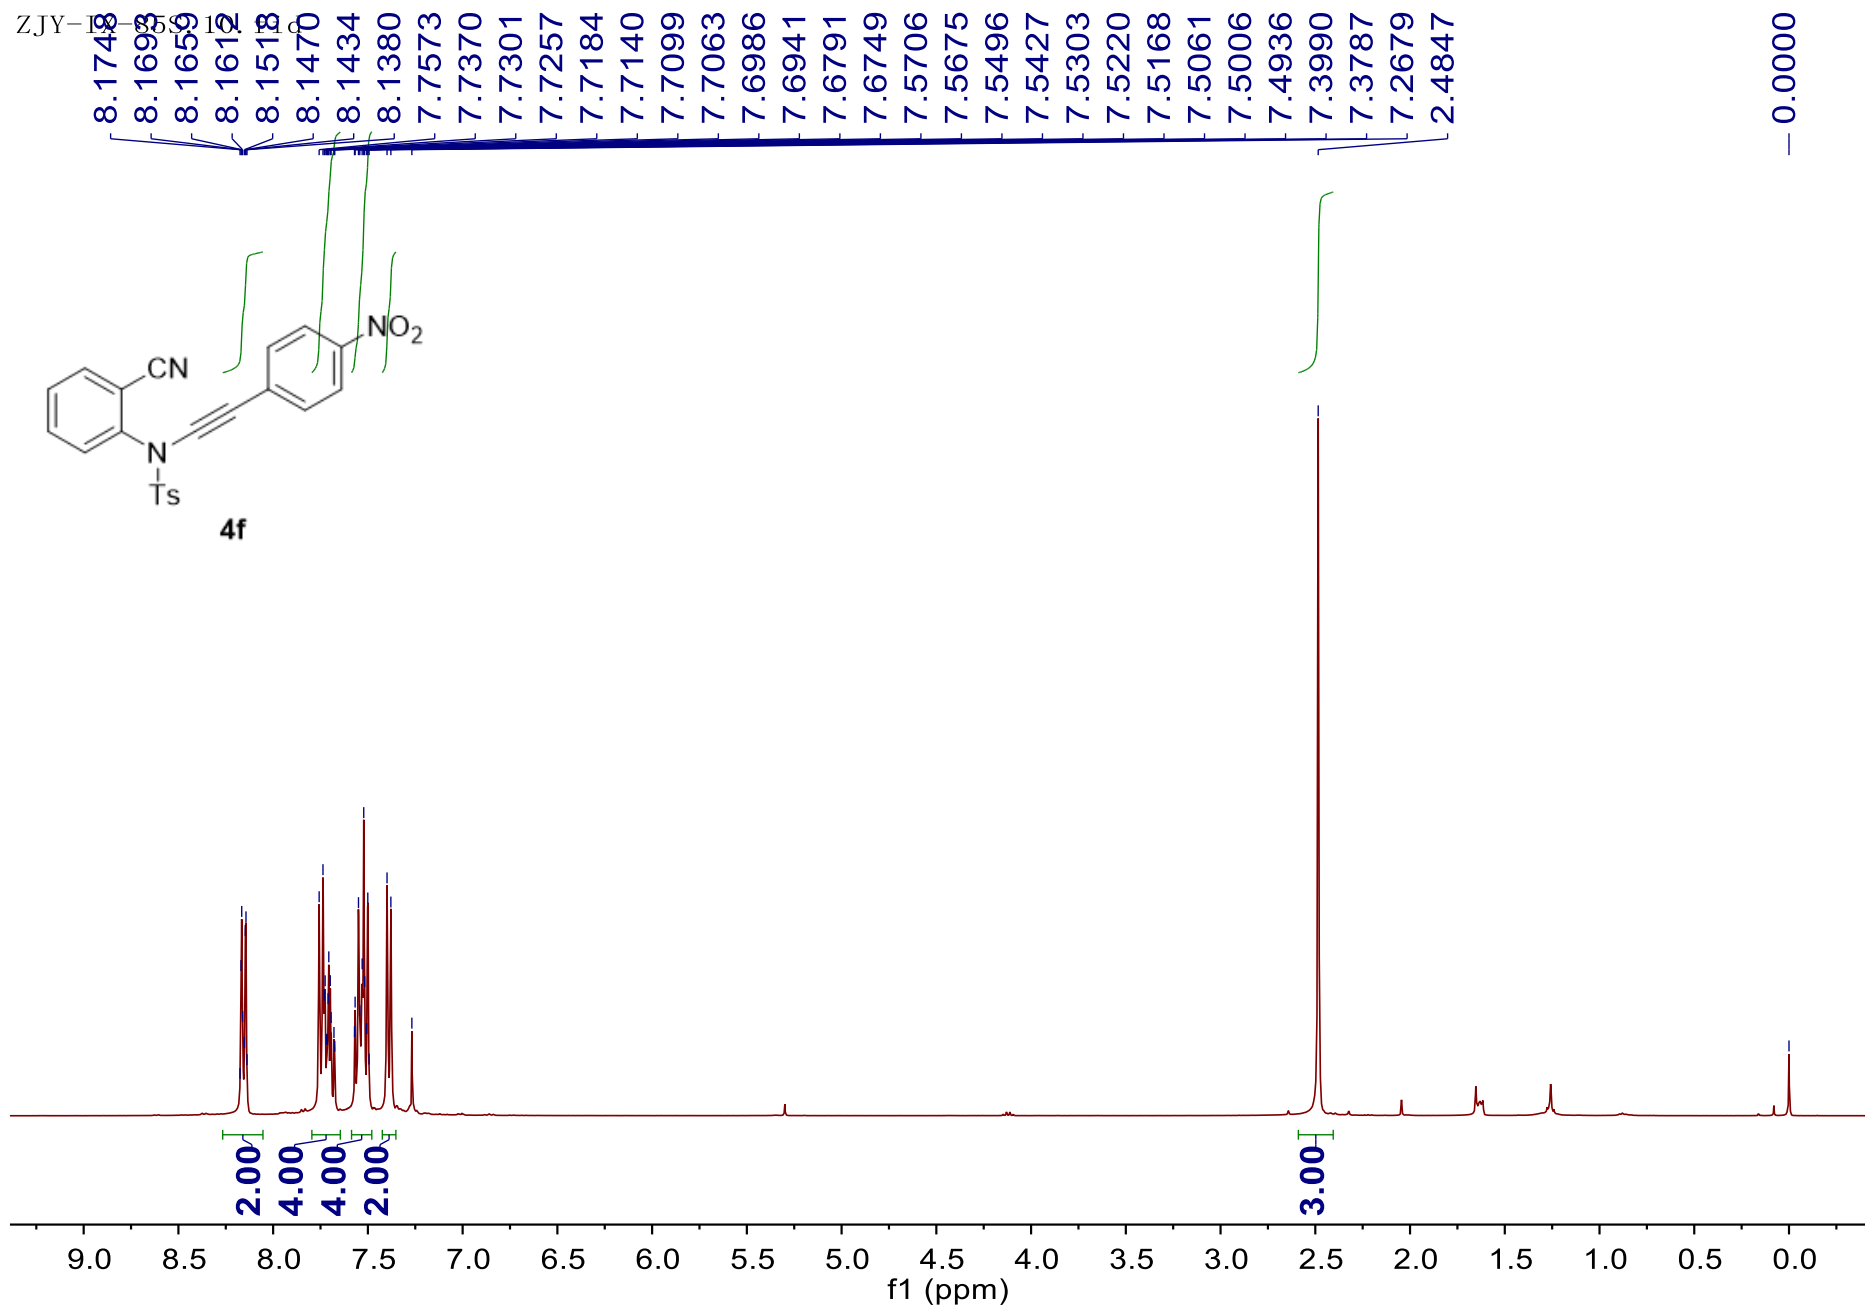

146.924  
146.530  
139.814  
134.486  
133.993  
132.719  
131.853  
130.304  
130.041  
129.952  
129.550  
128.711  
123.750  
115.038  
112.627

86.805

77.518

77.200

76.883

70.737

21.996

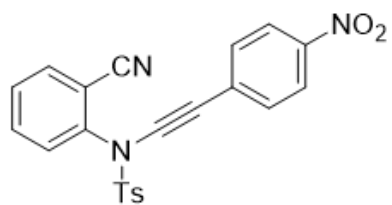

4f

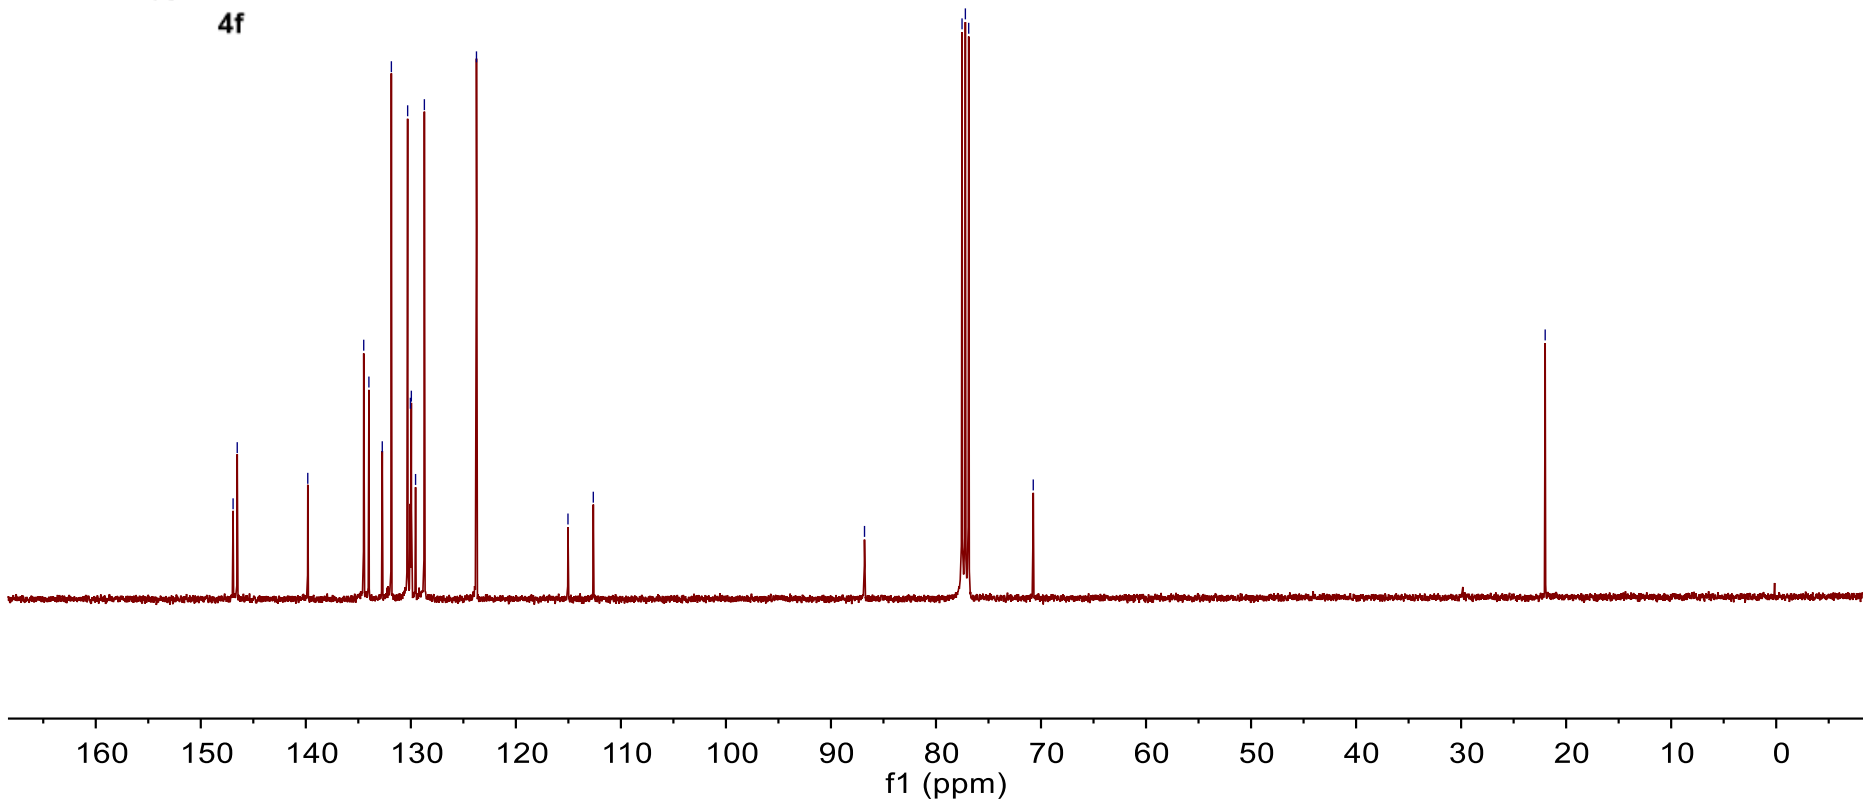

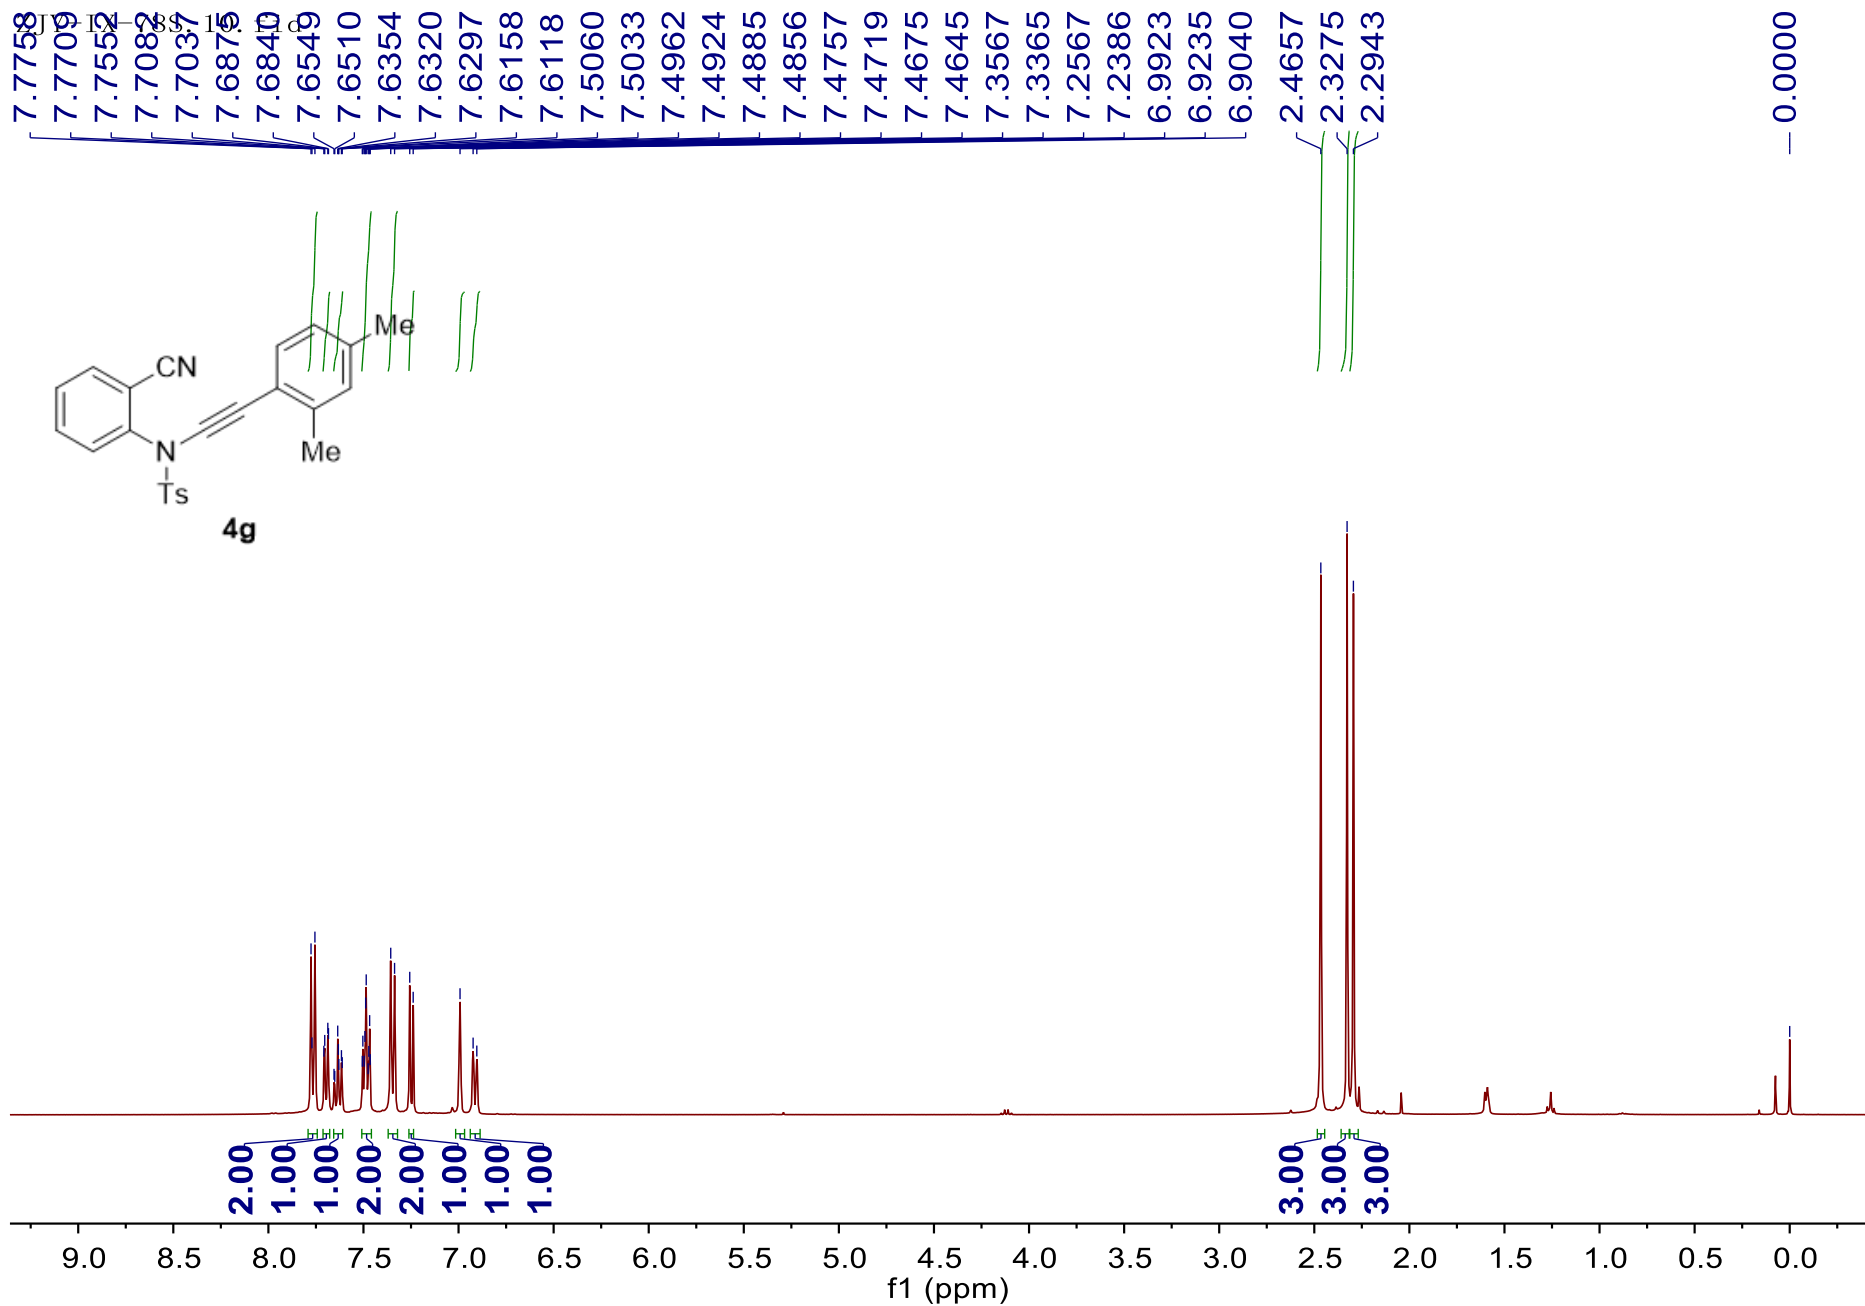

ZJY-K-286-11

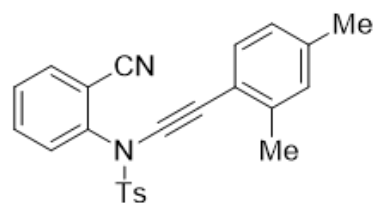

4g

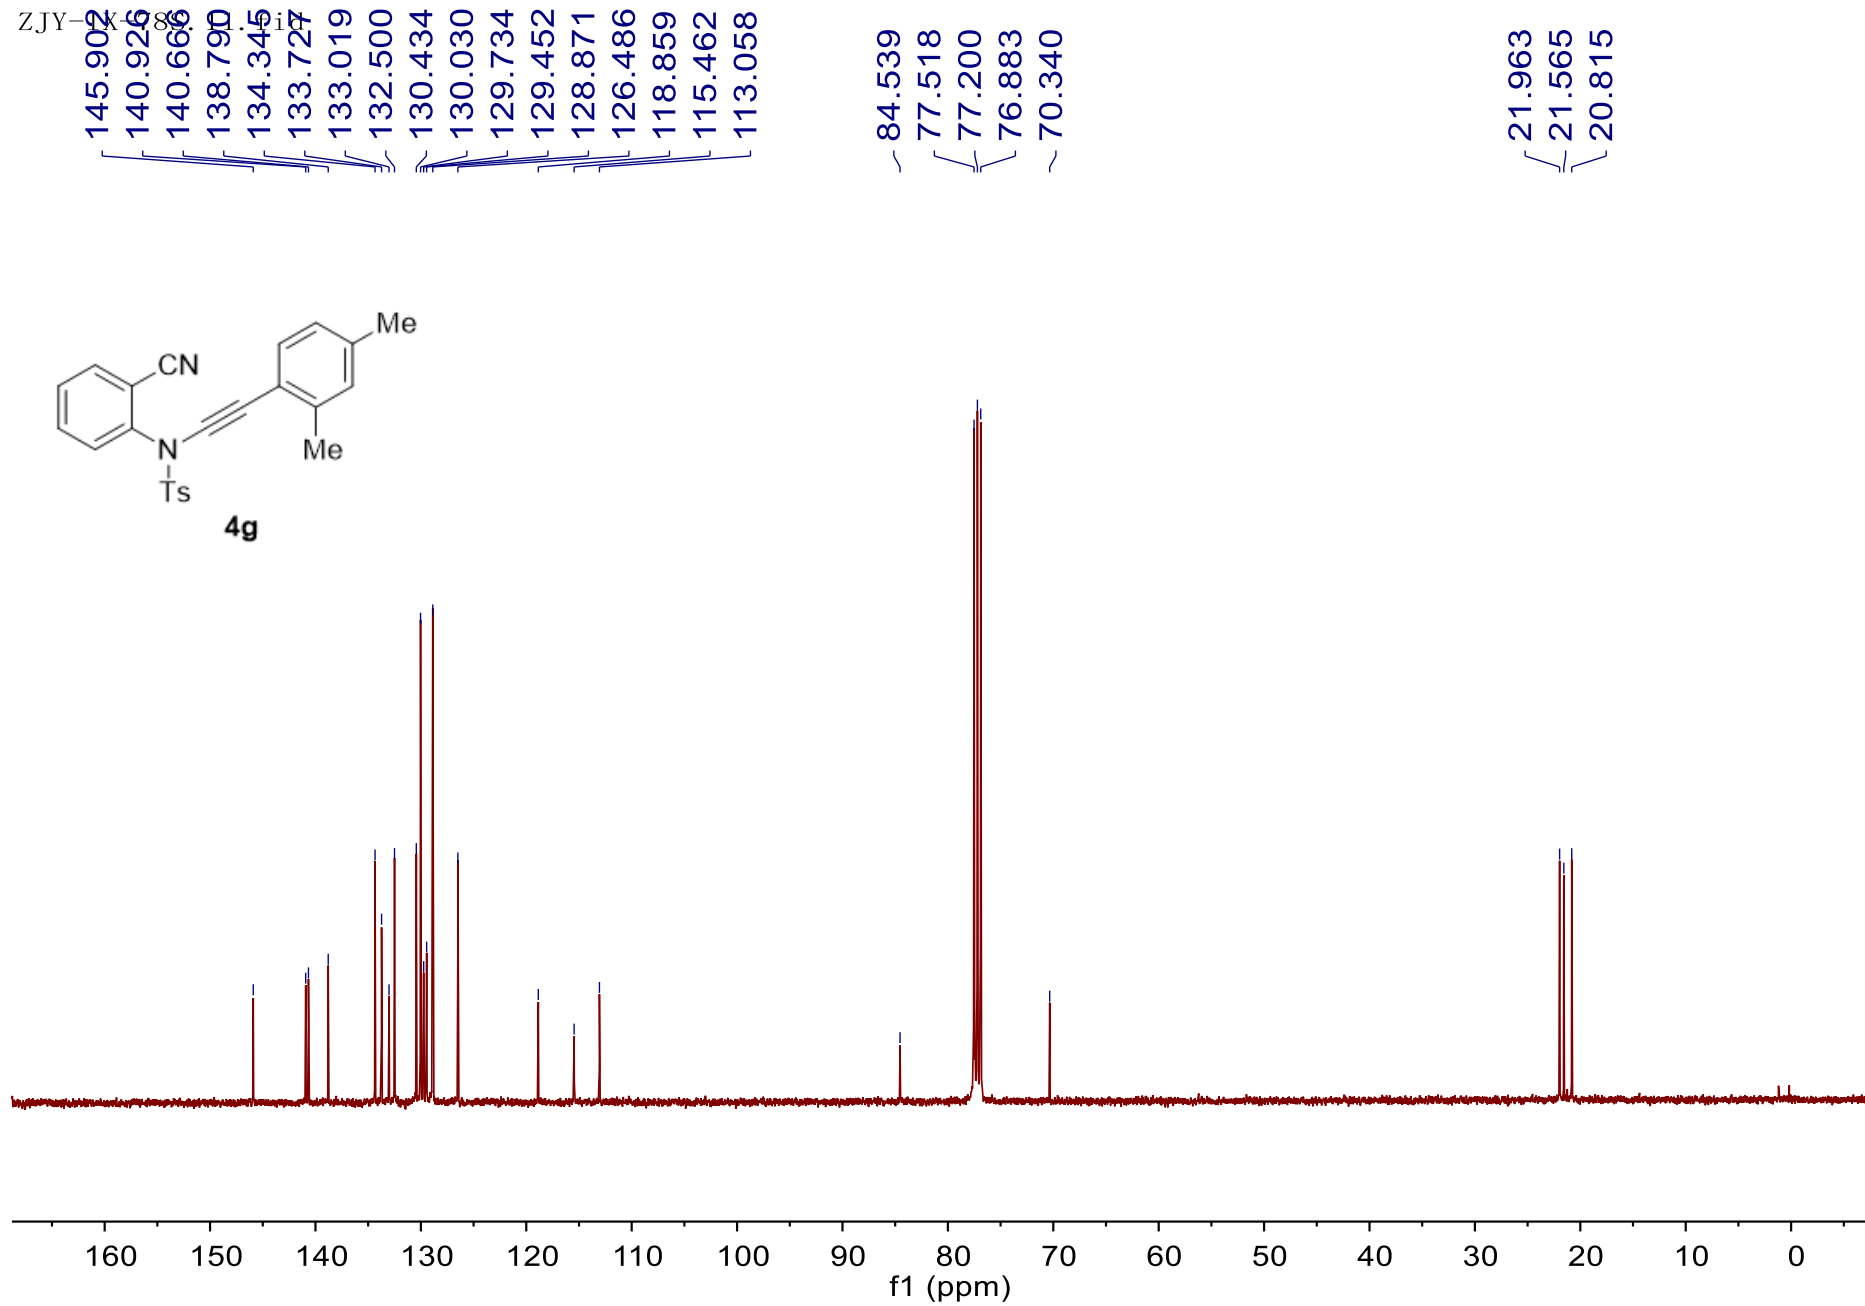

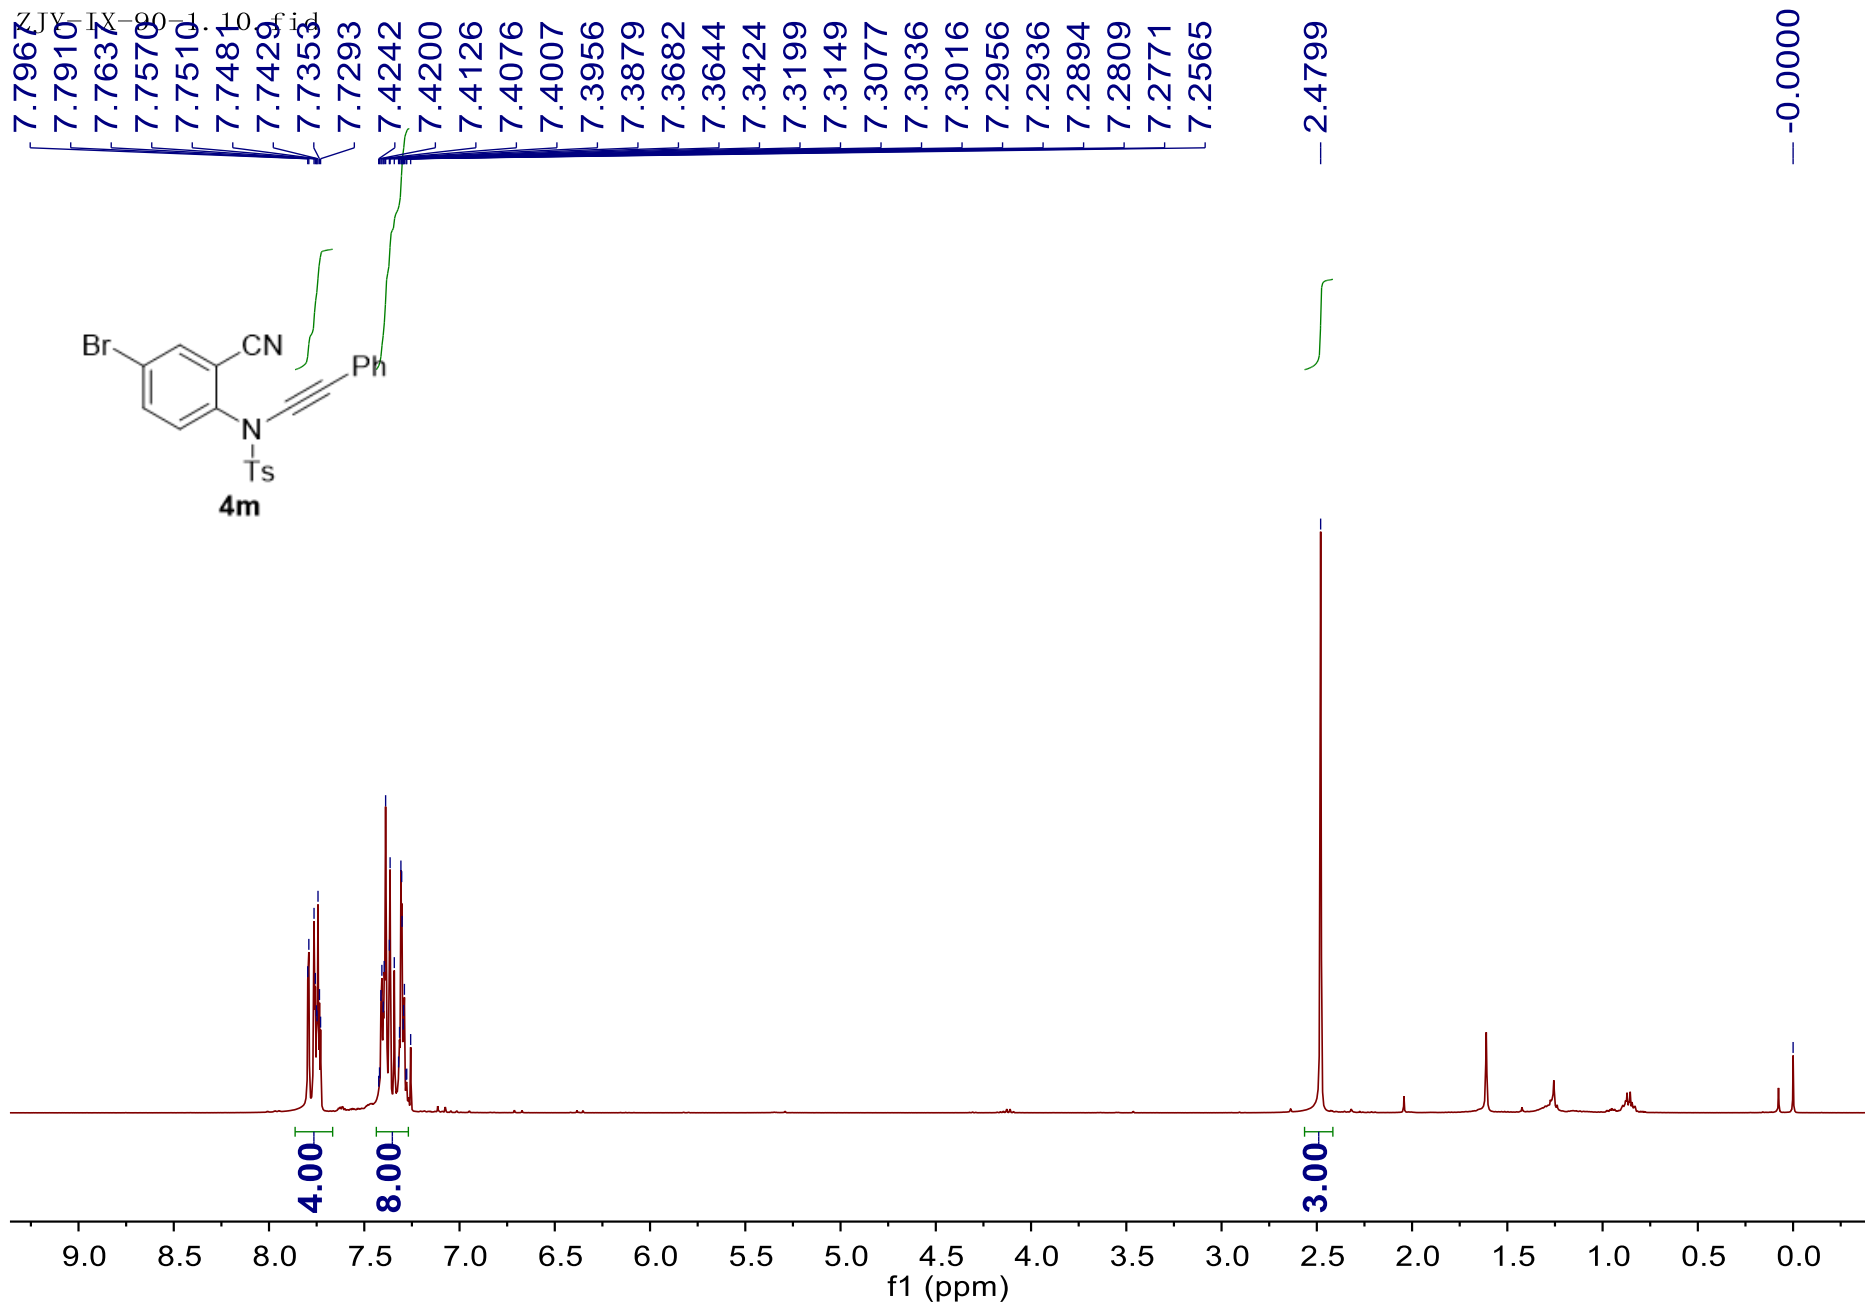

ZJY-IX-00110 f1d

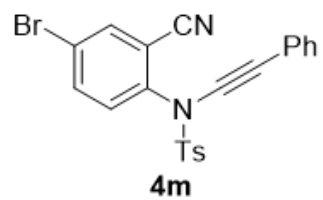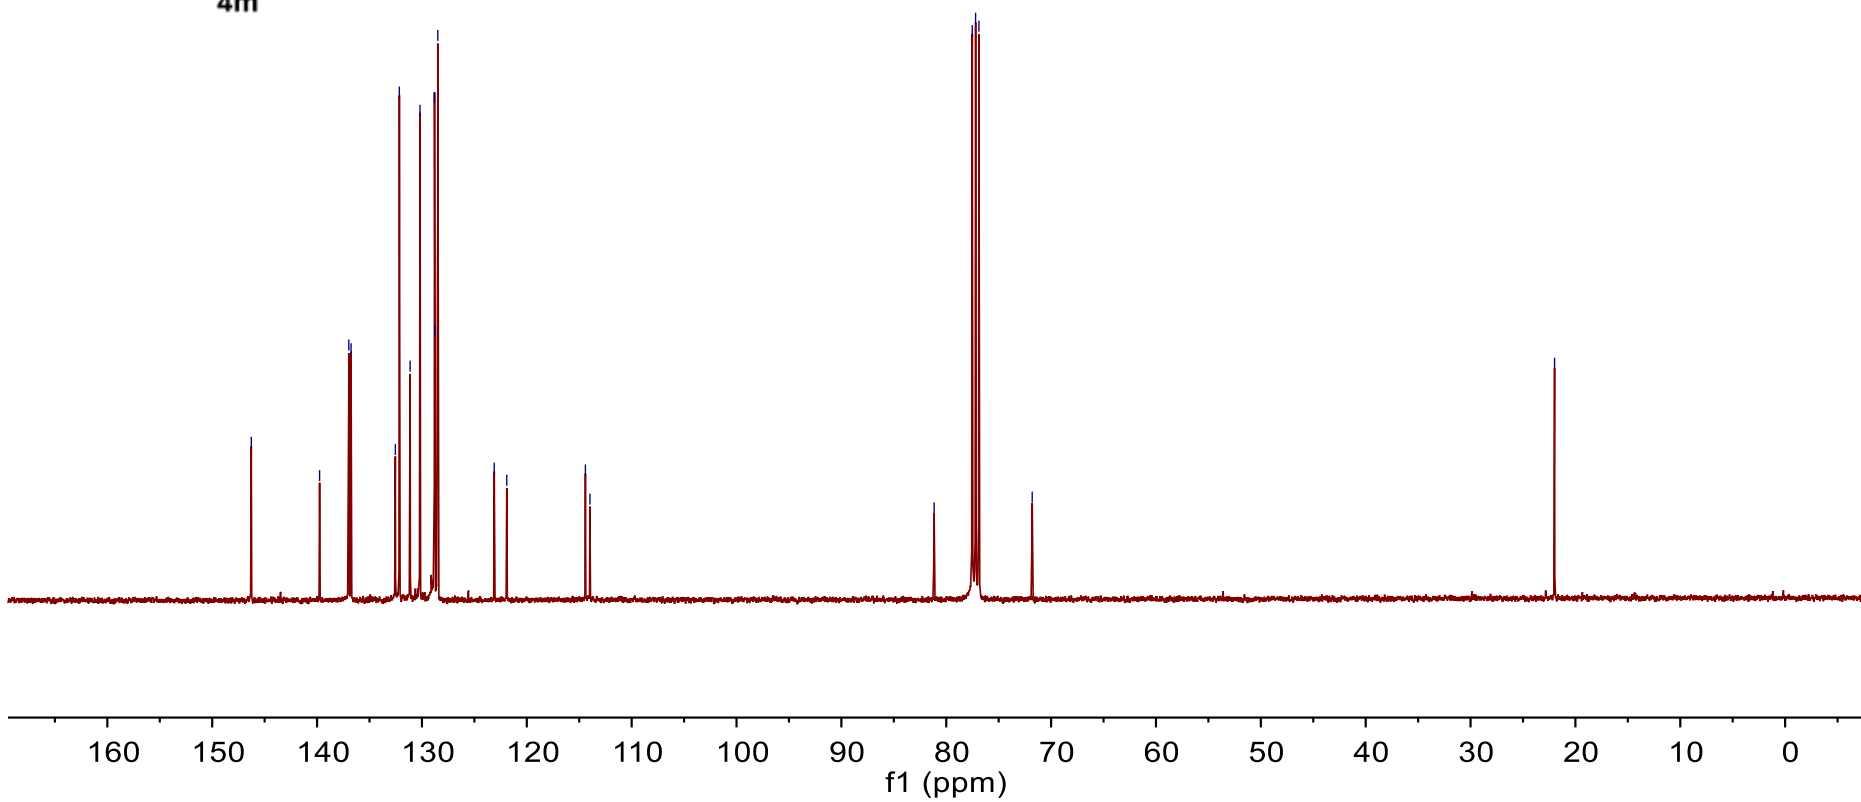

ZJ-16-10-fid

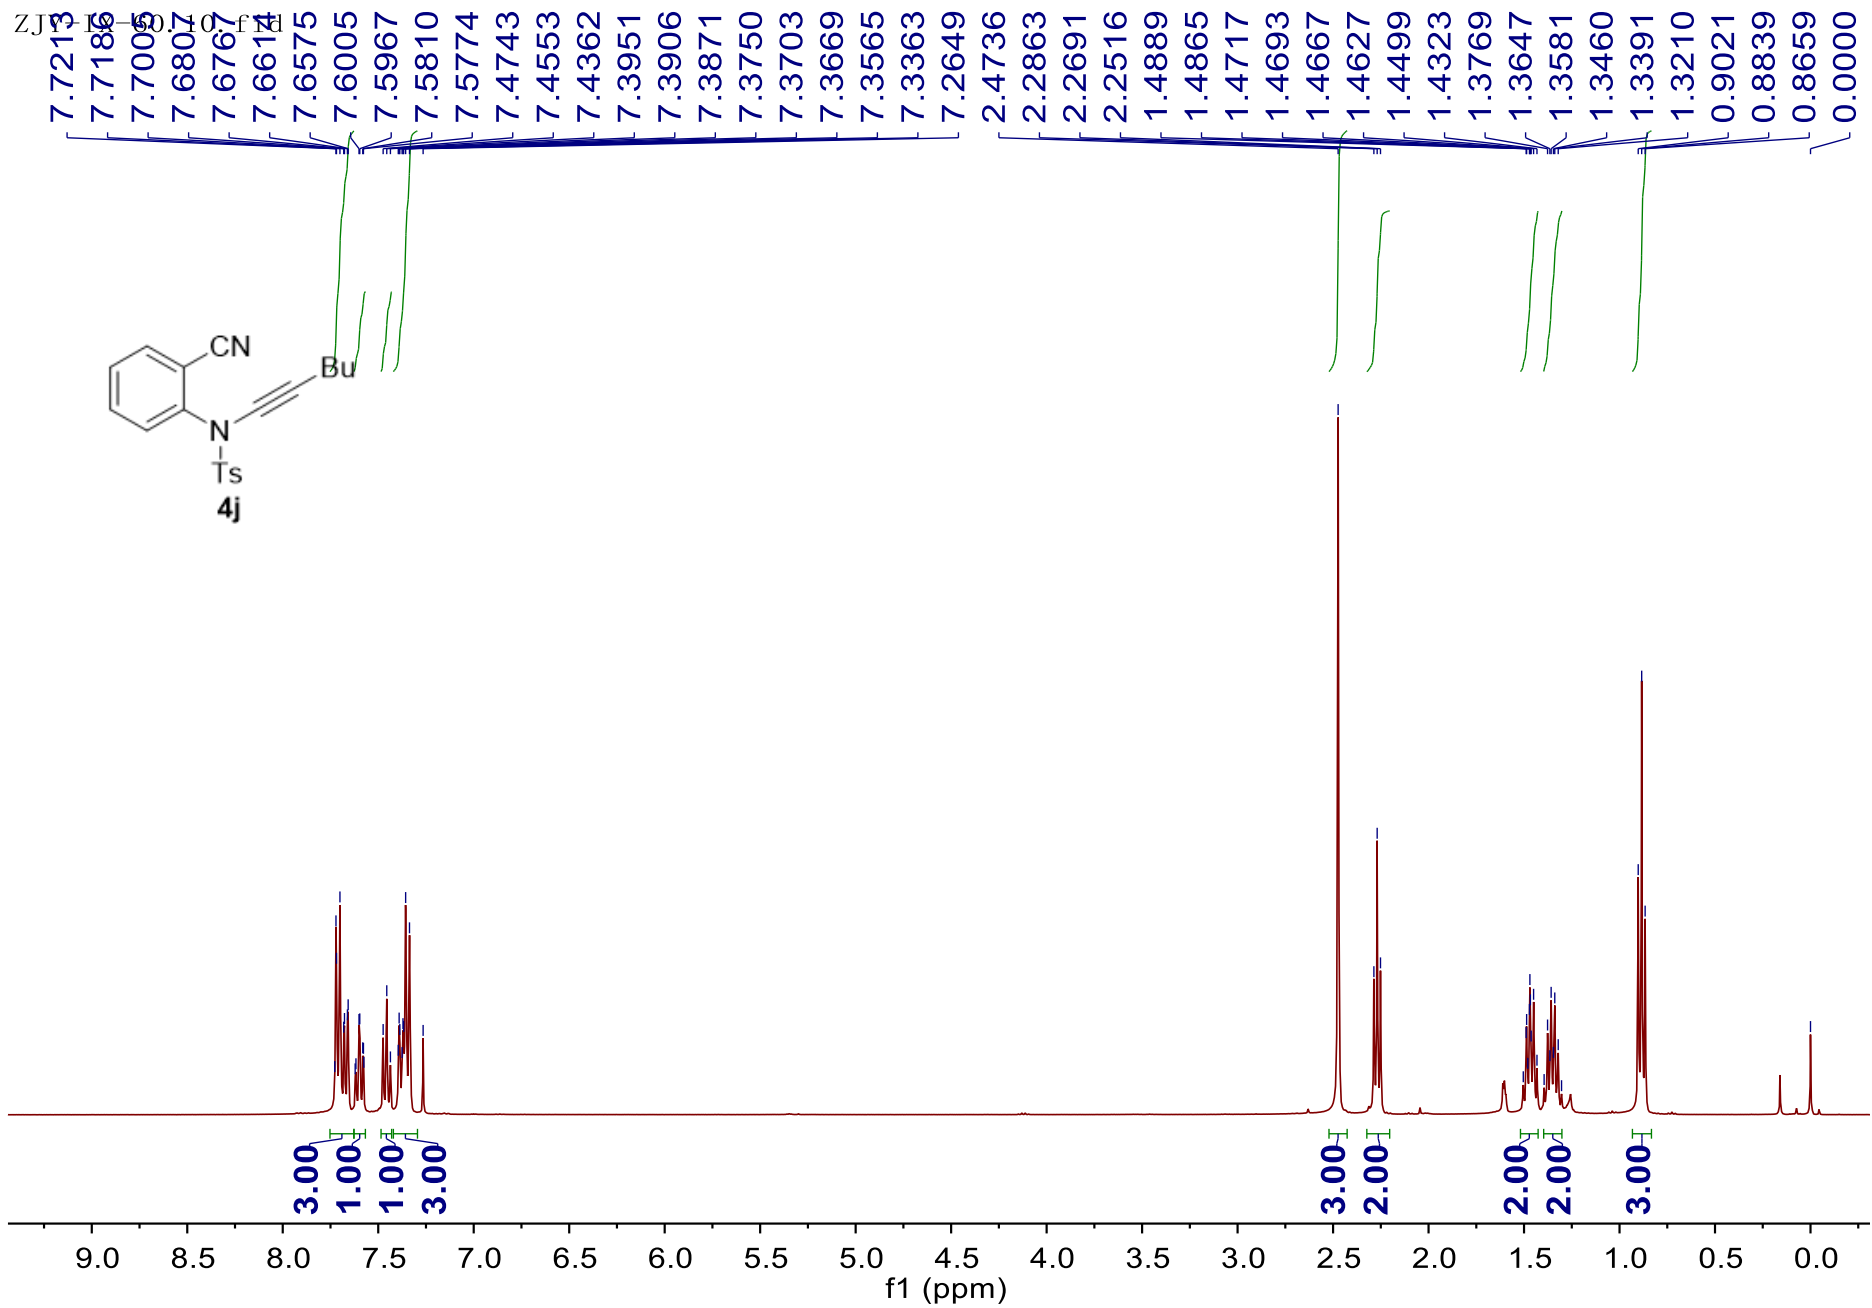



ZJY-IX-6001 Pd

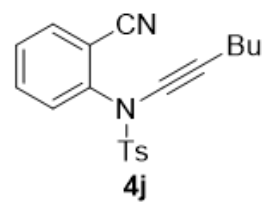

145.643  
141.150  
134.242  
133.587  
132.953  
129.875  
129.540  
129.210  
128.828  
~ 115.498  
~ 113.001

77.518  
77.200  
76.883  
72.841  
71.648

— 30.829  
22.030  
21.942  
18.241  
13.723

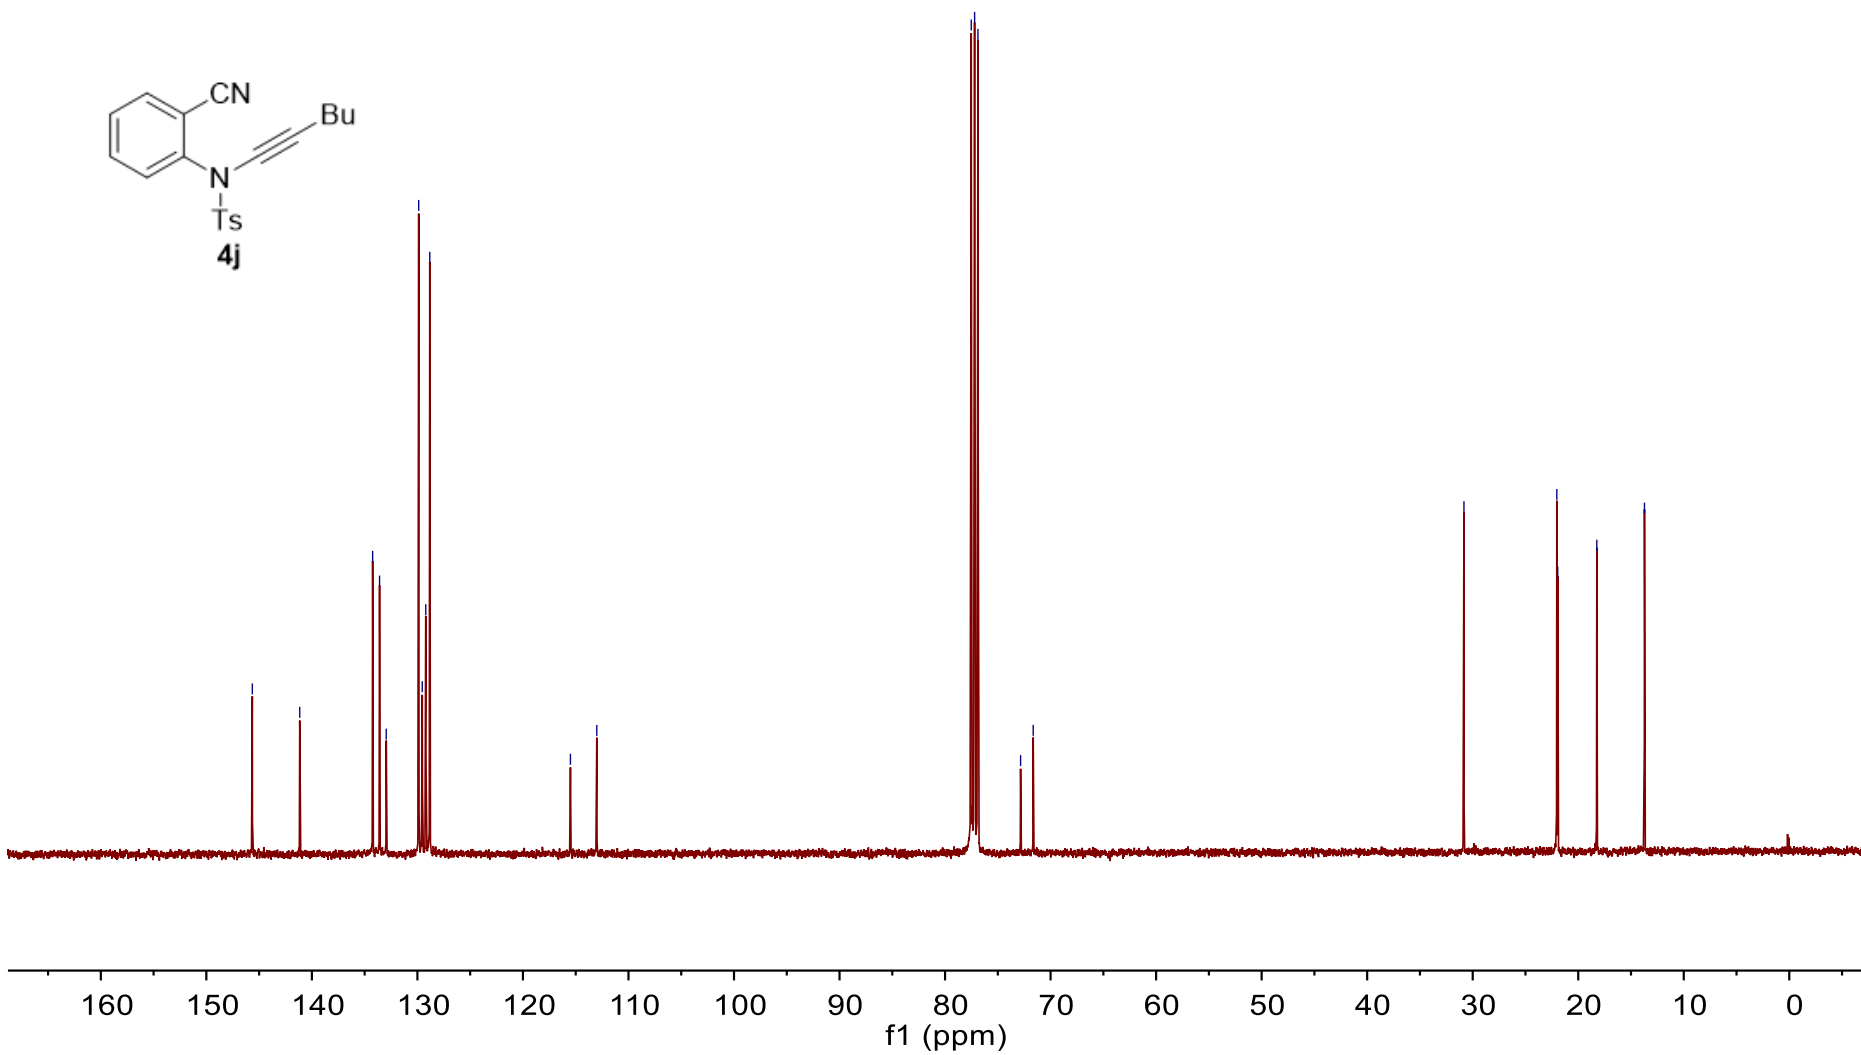

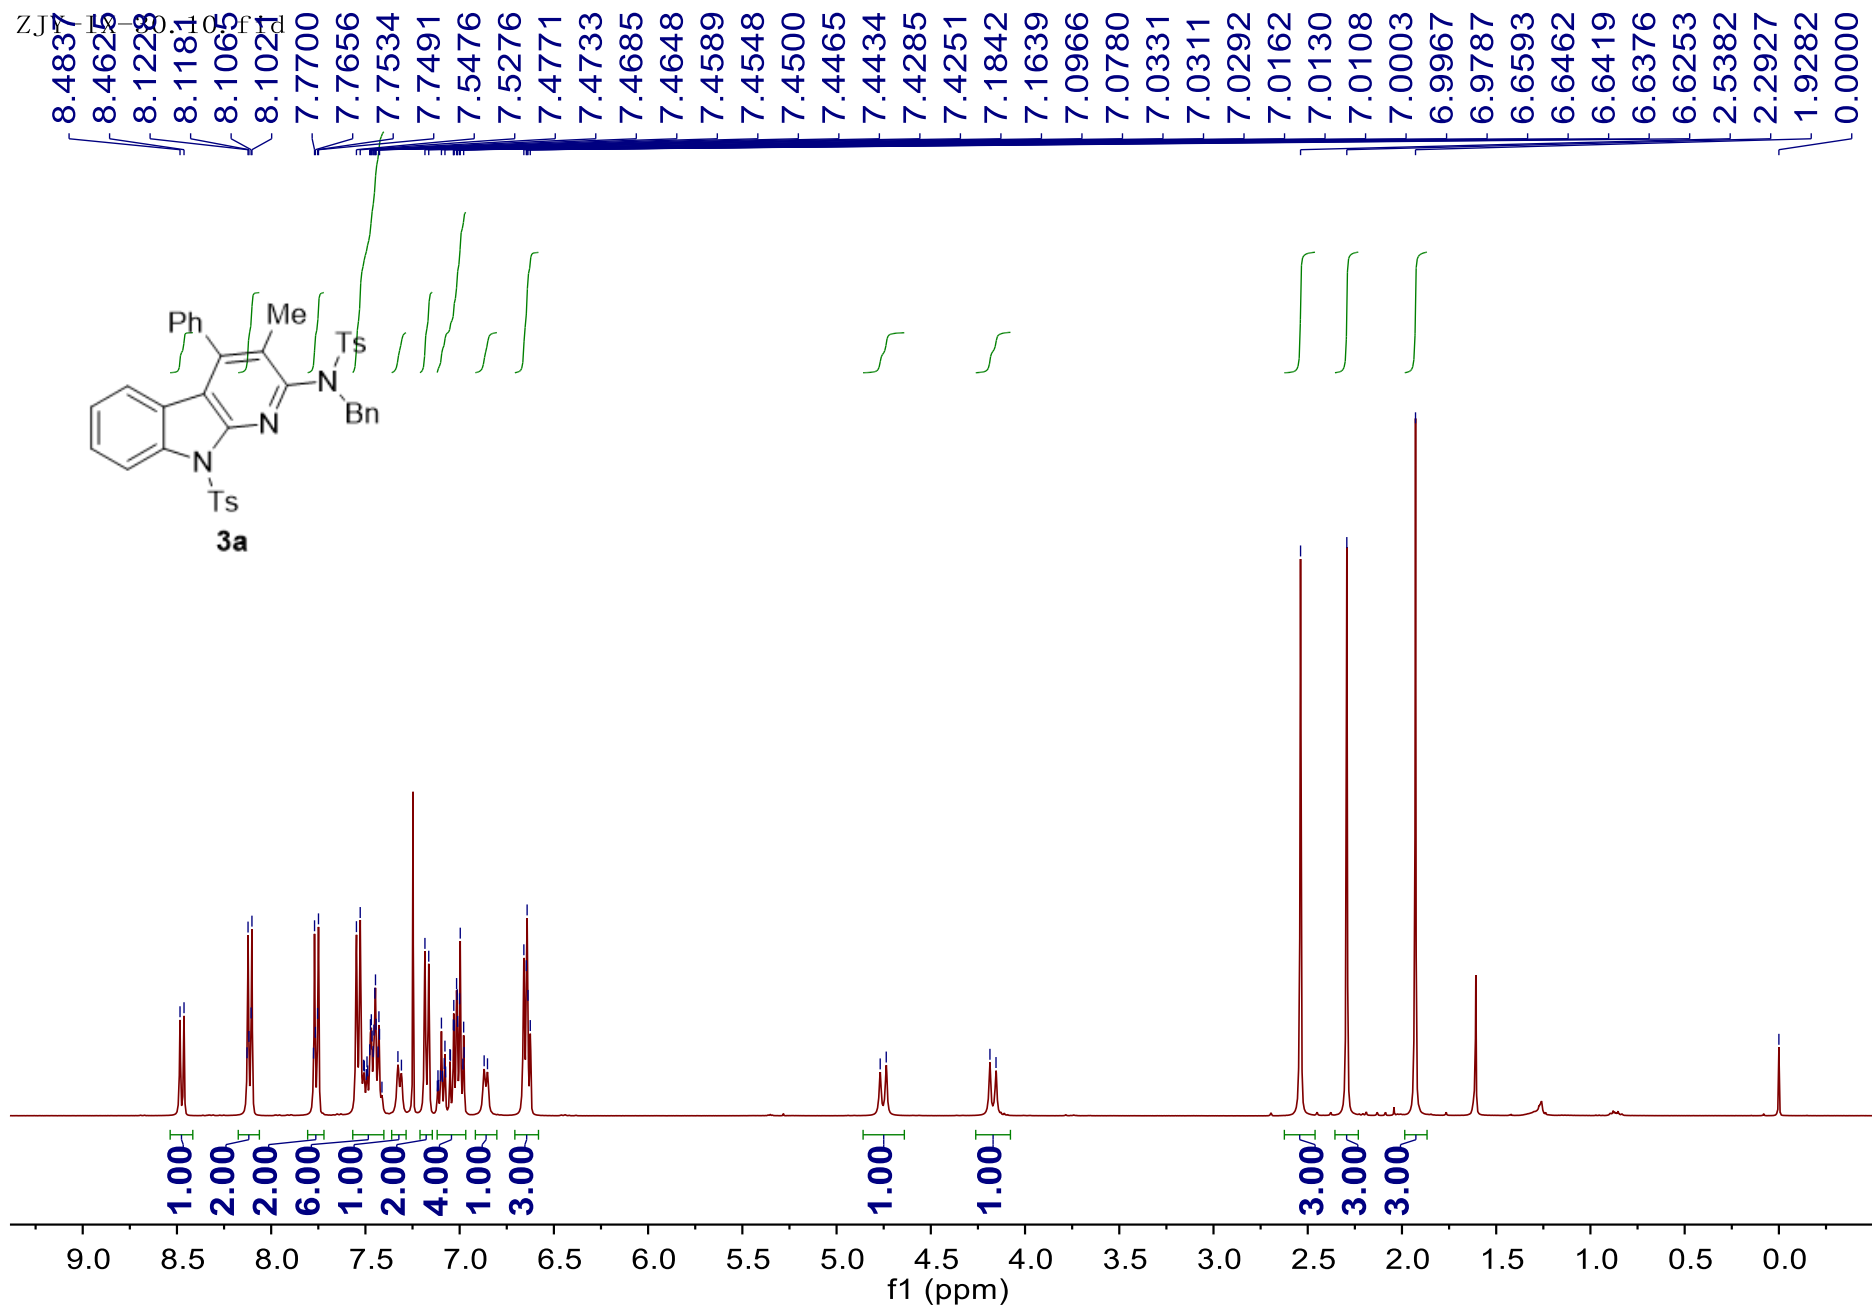

ZJY-EX-100-00161

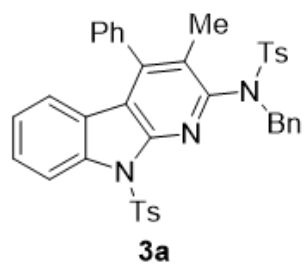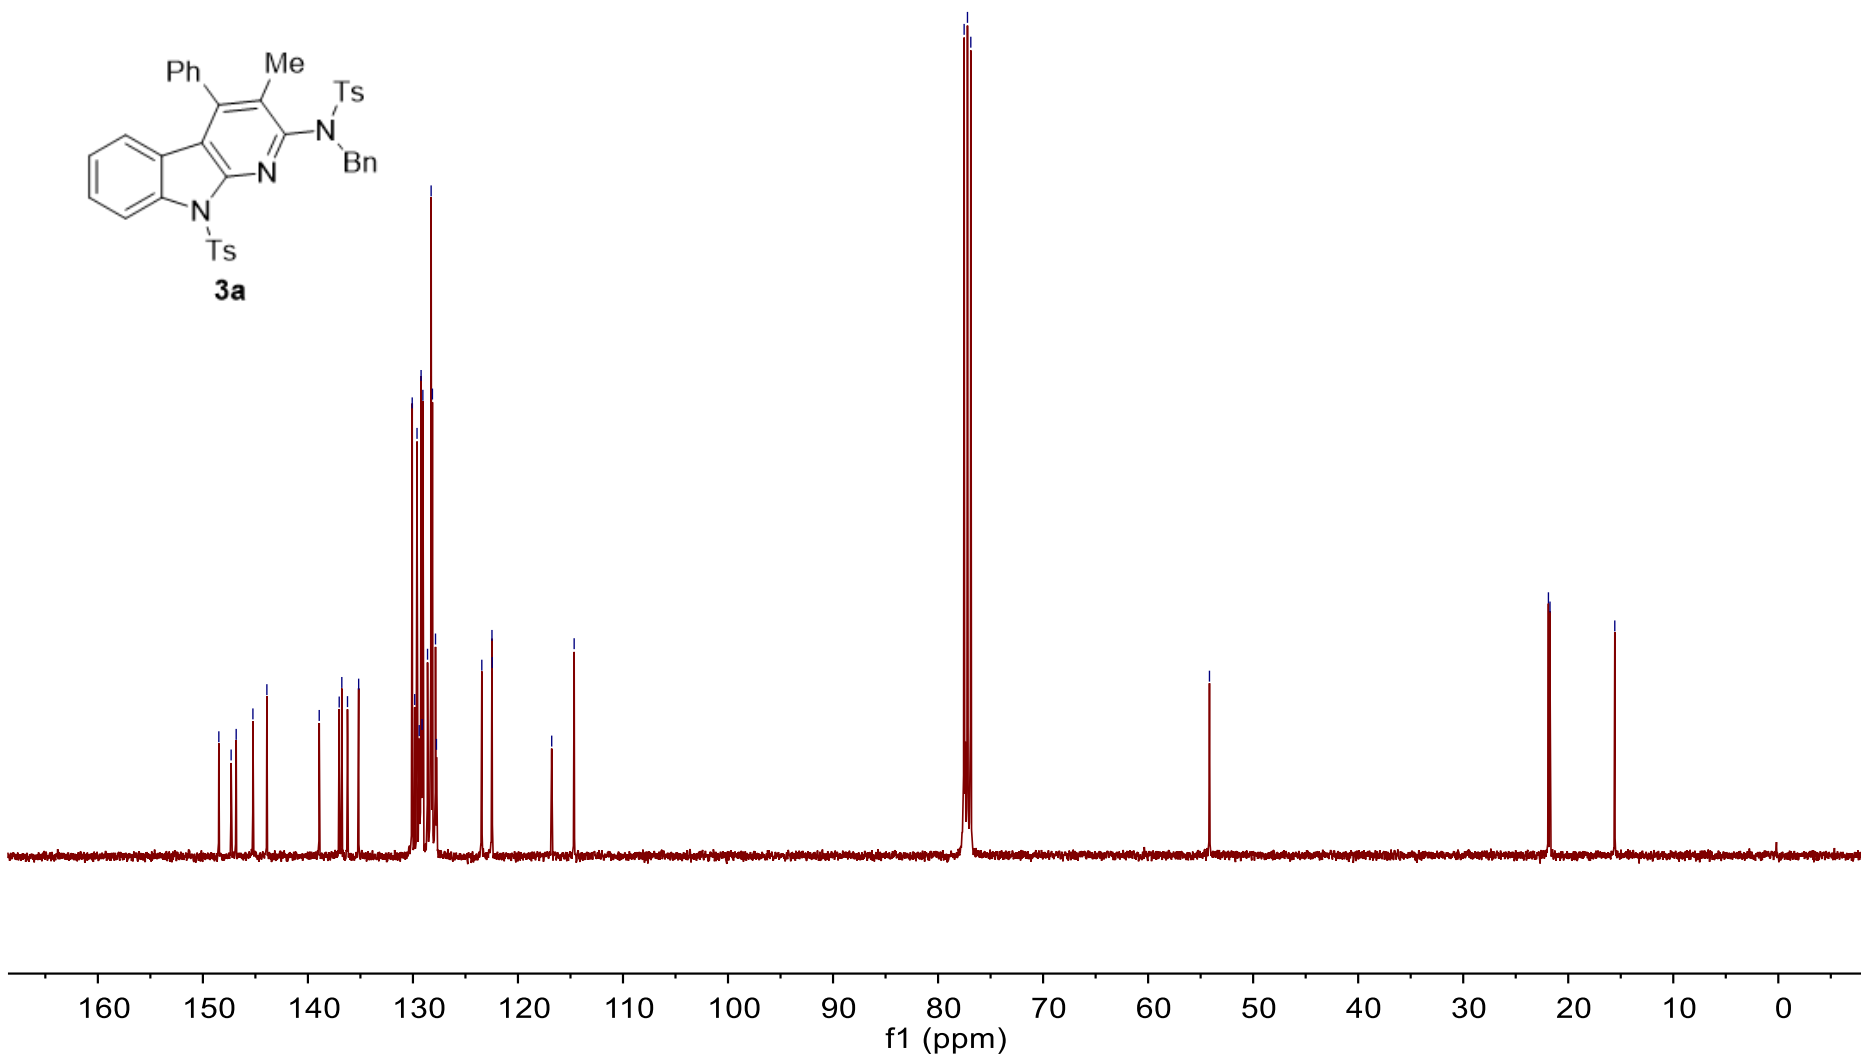

ZJ-EX-B-100f1d

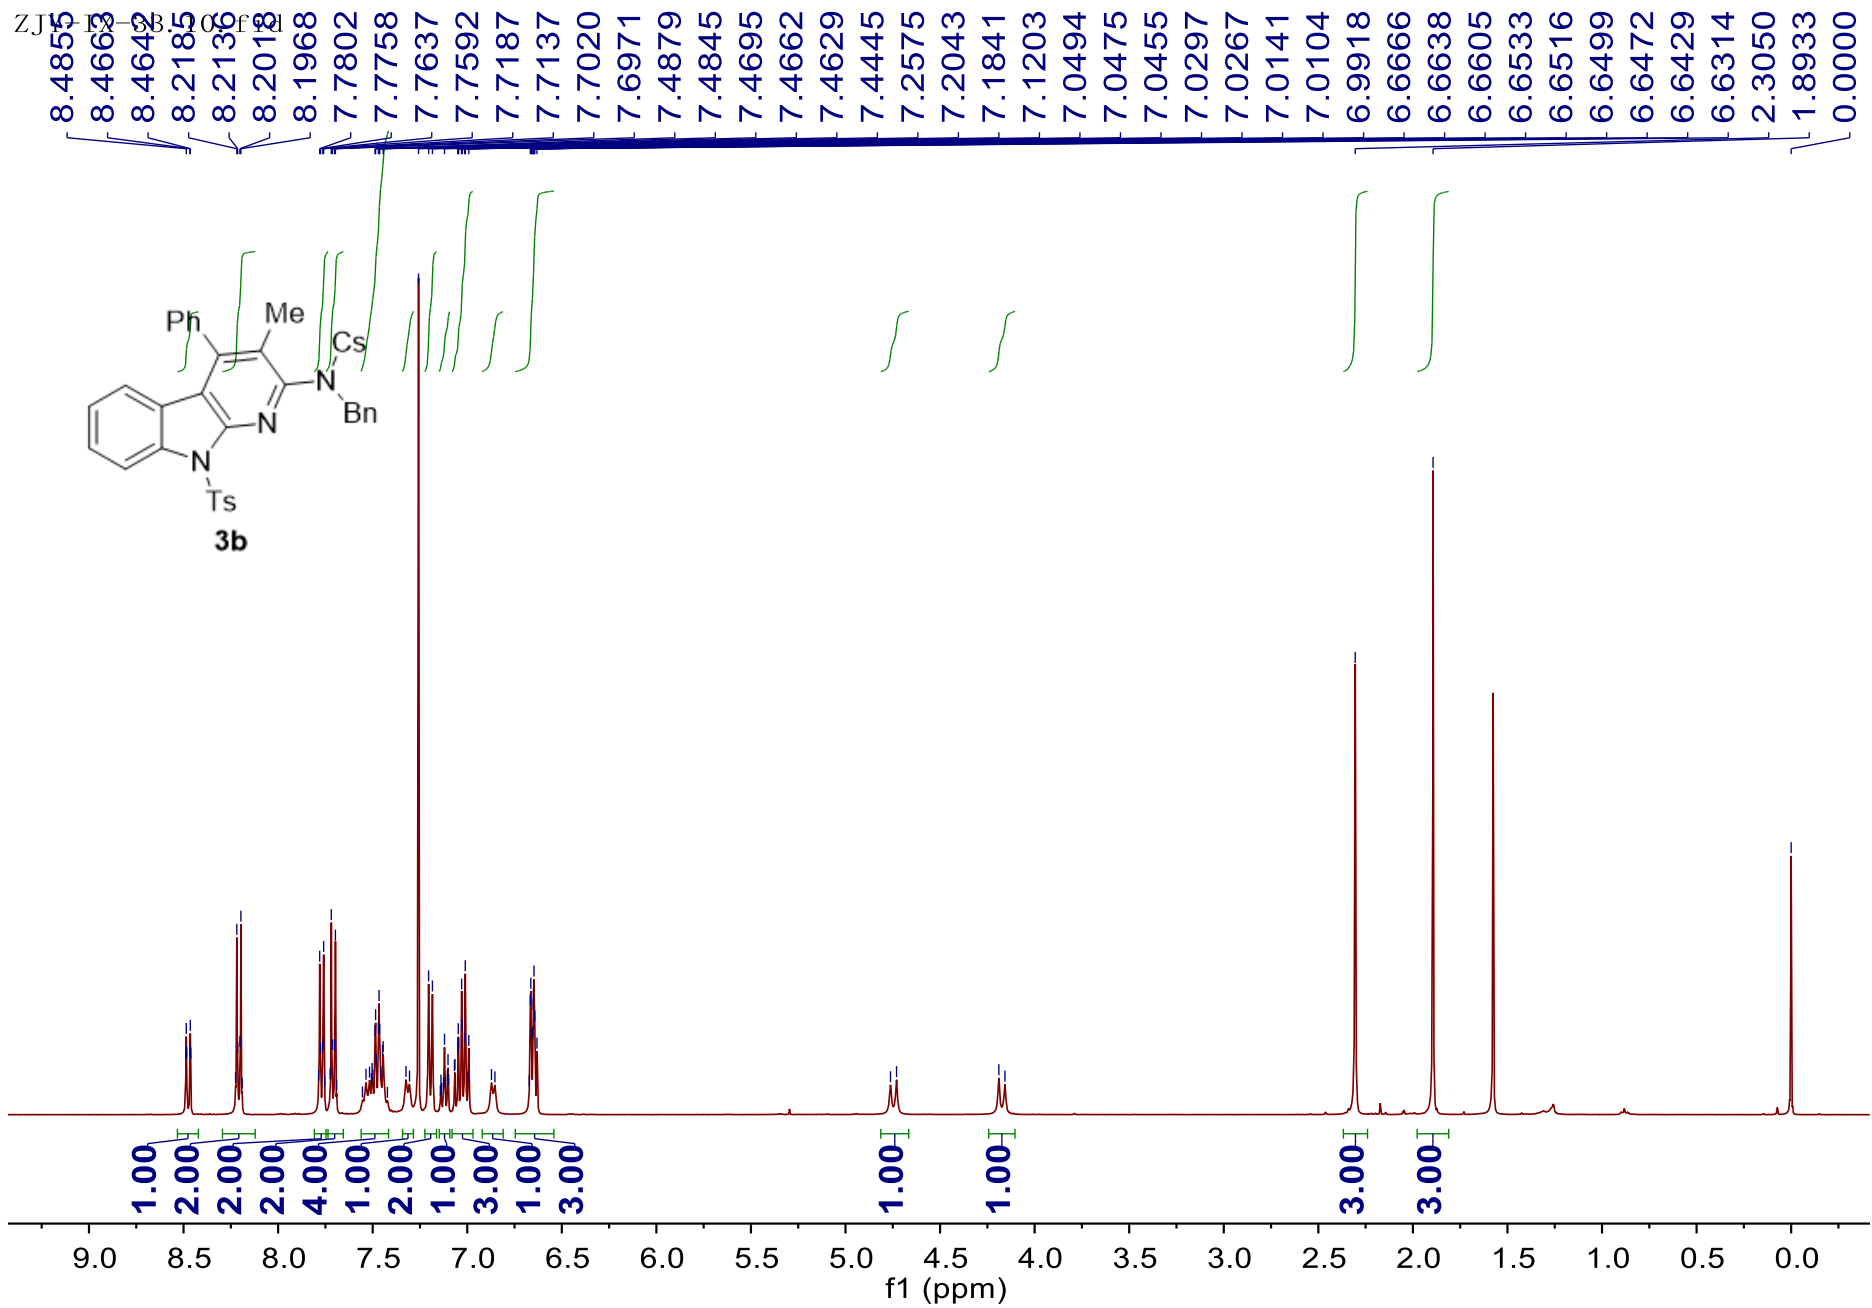

ZJY-13-001.f1d

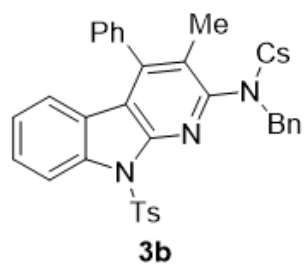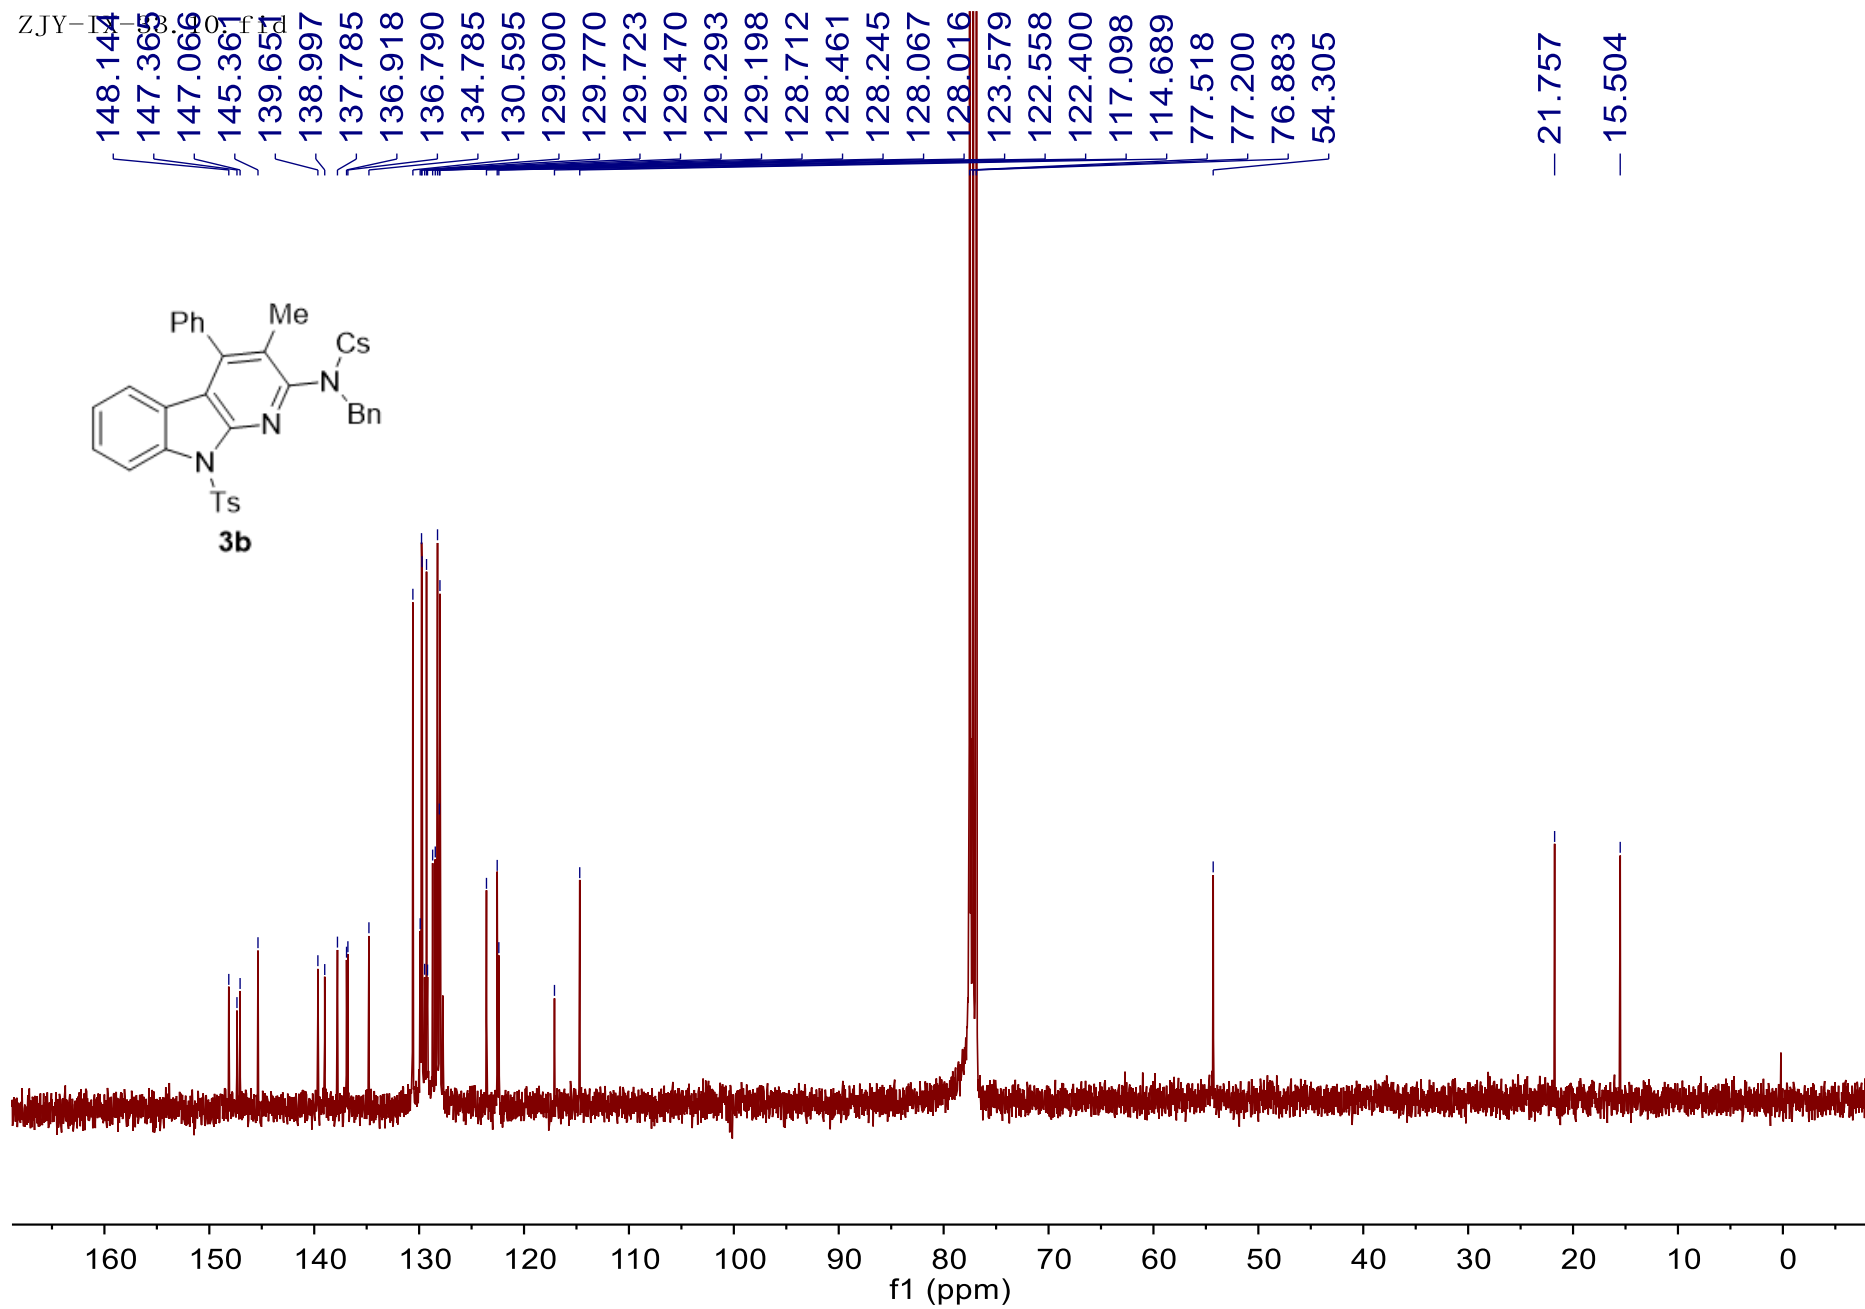

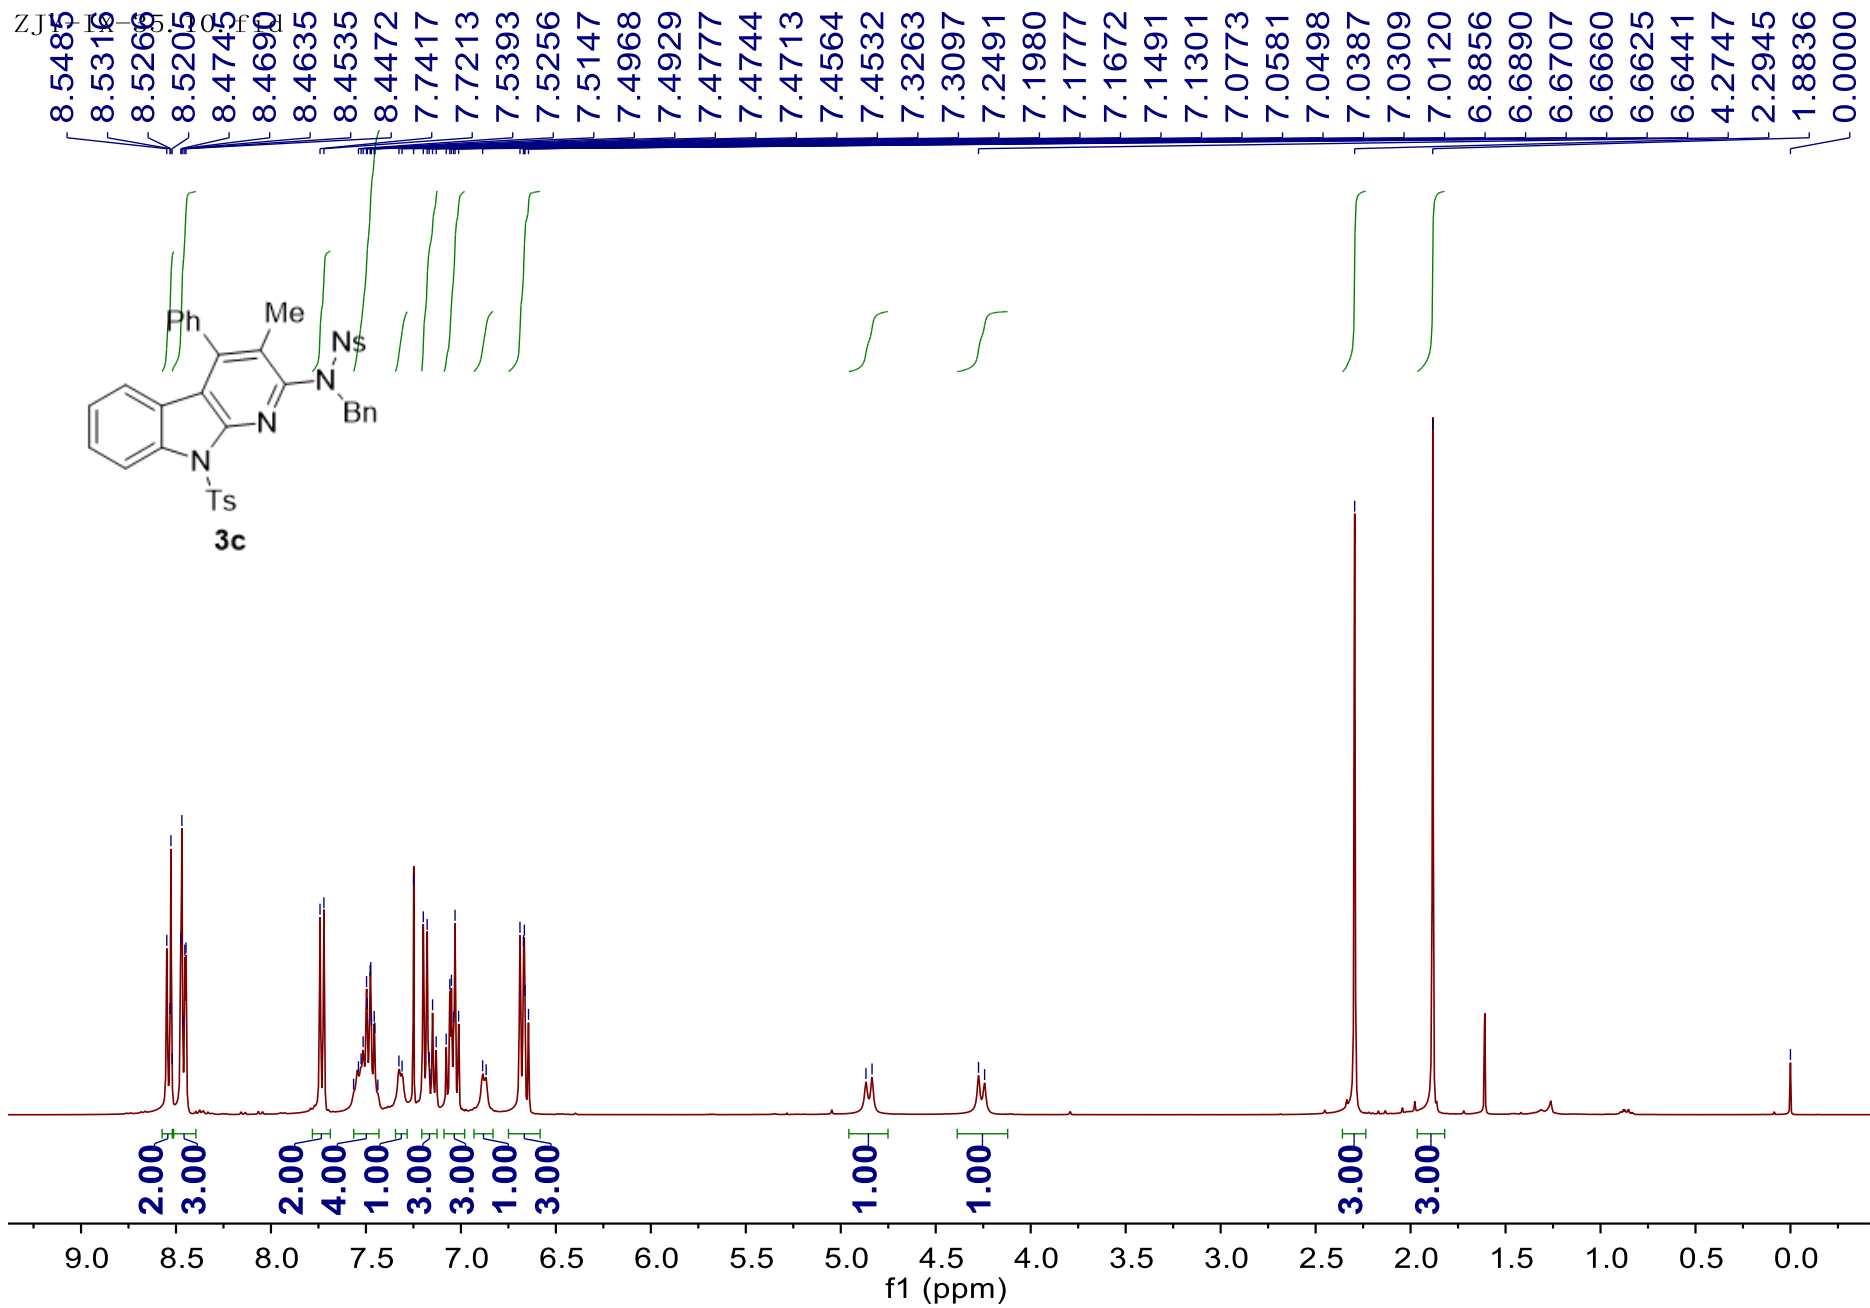

ZJY-7X-35812 f1d9

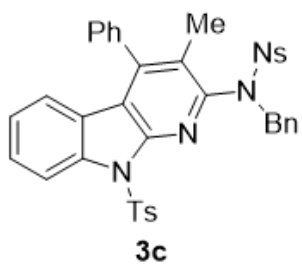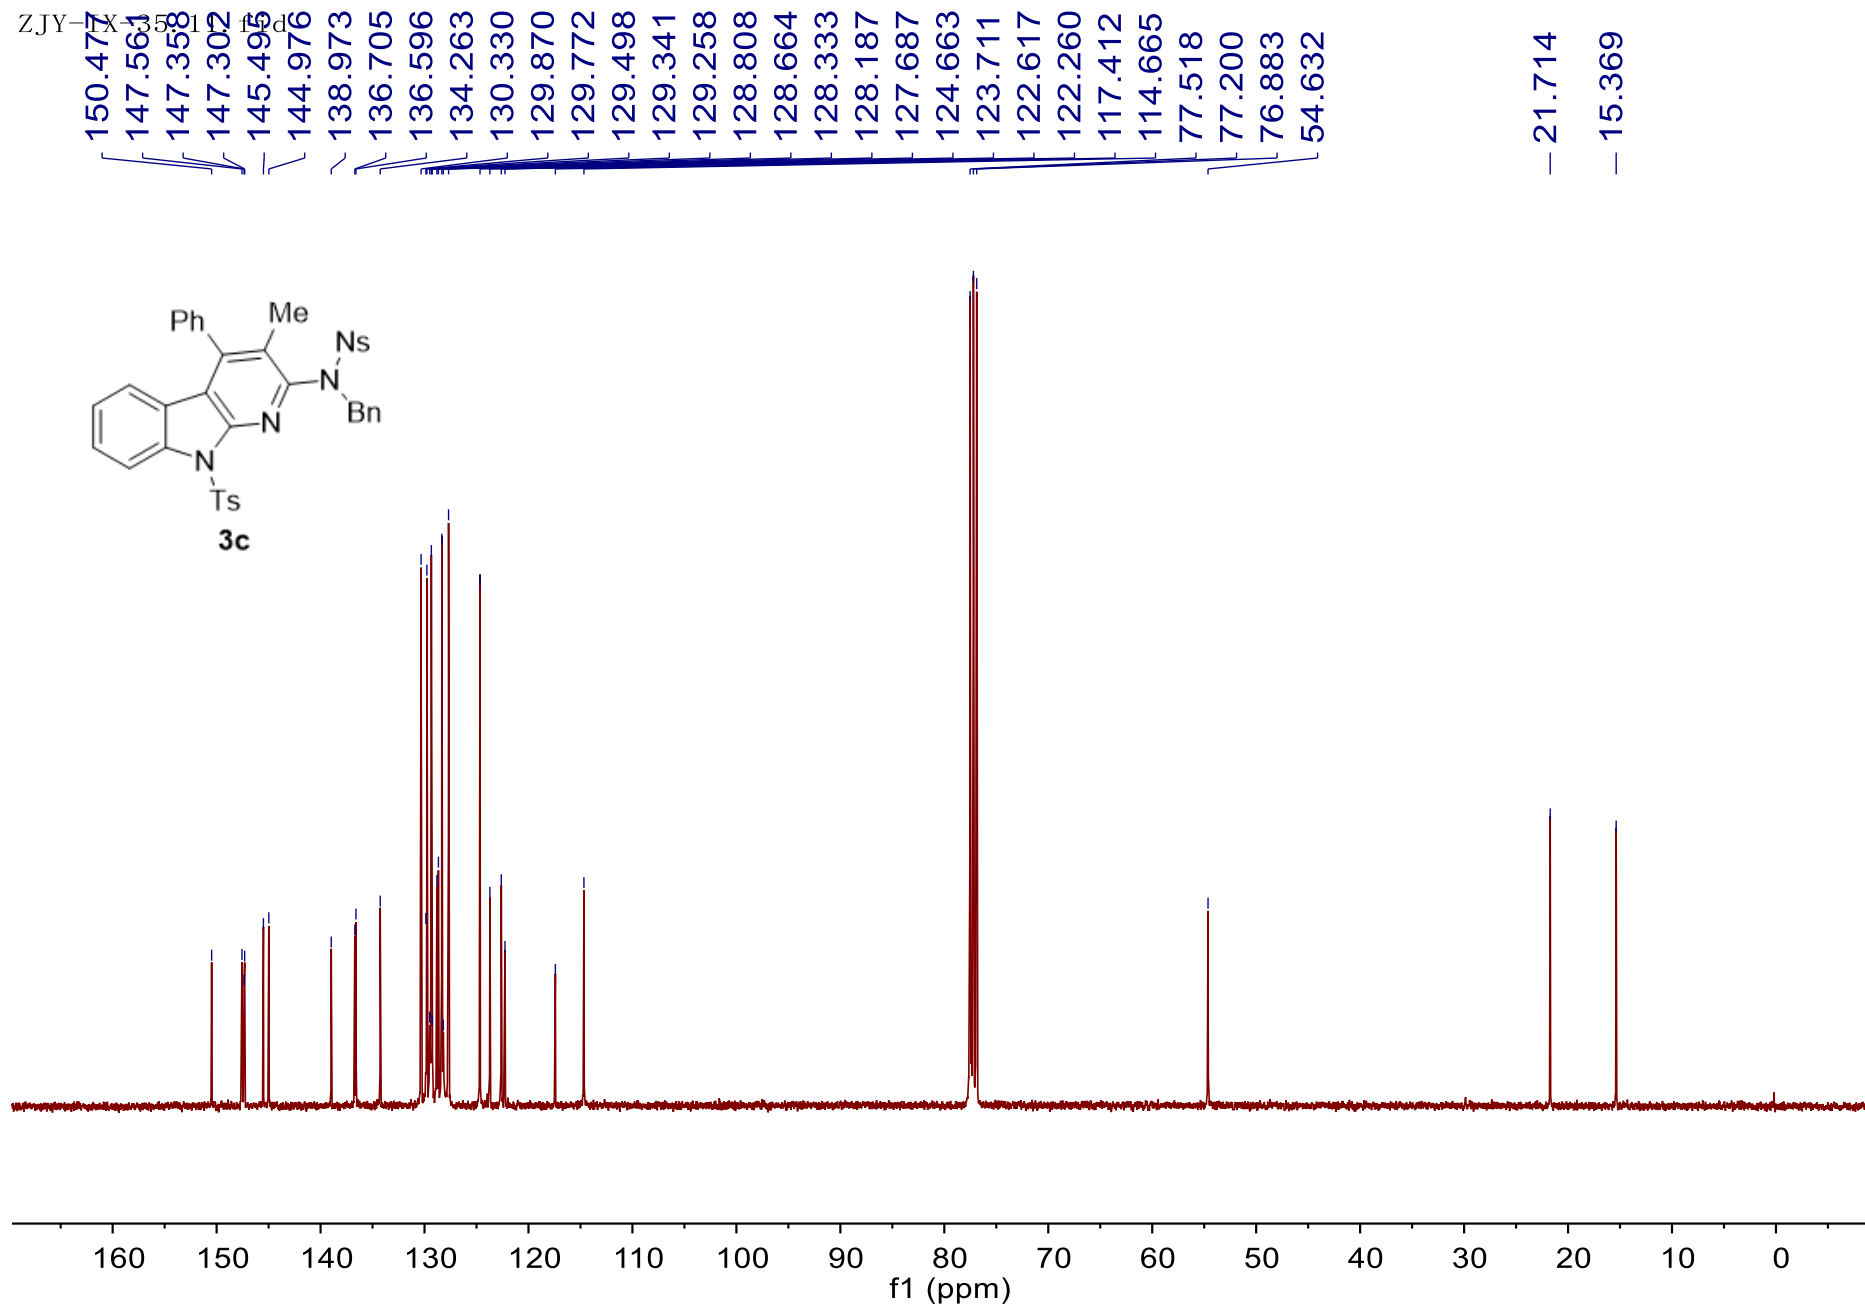

ZJY-IX-32-3-10 f1d

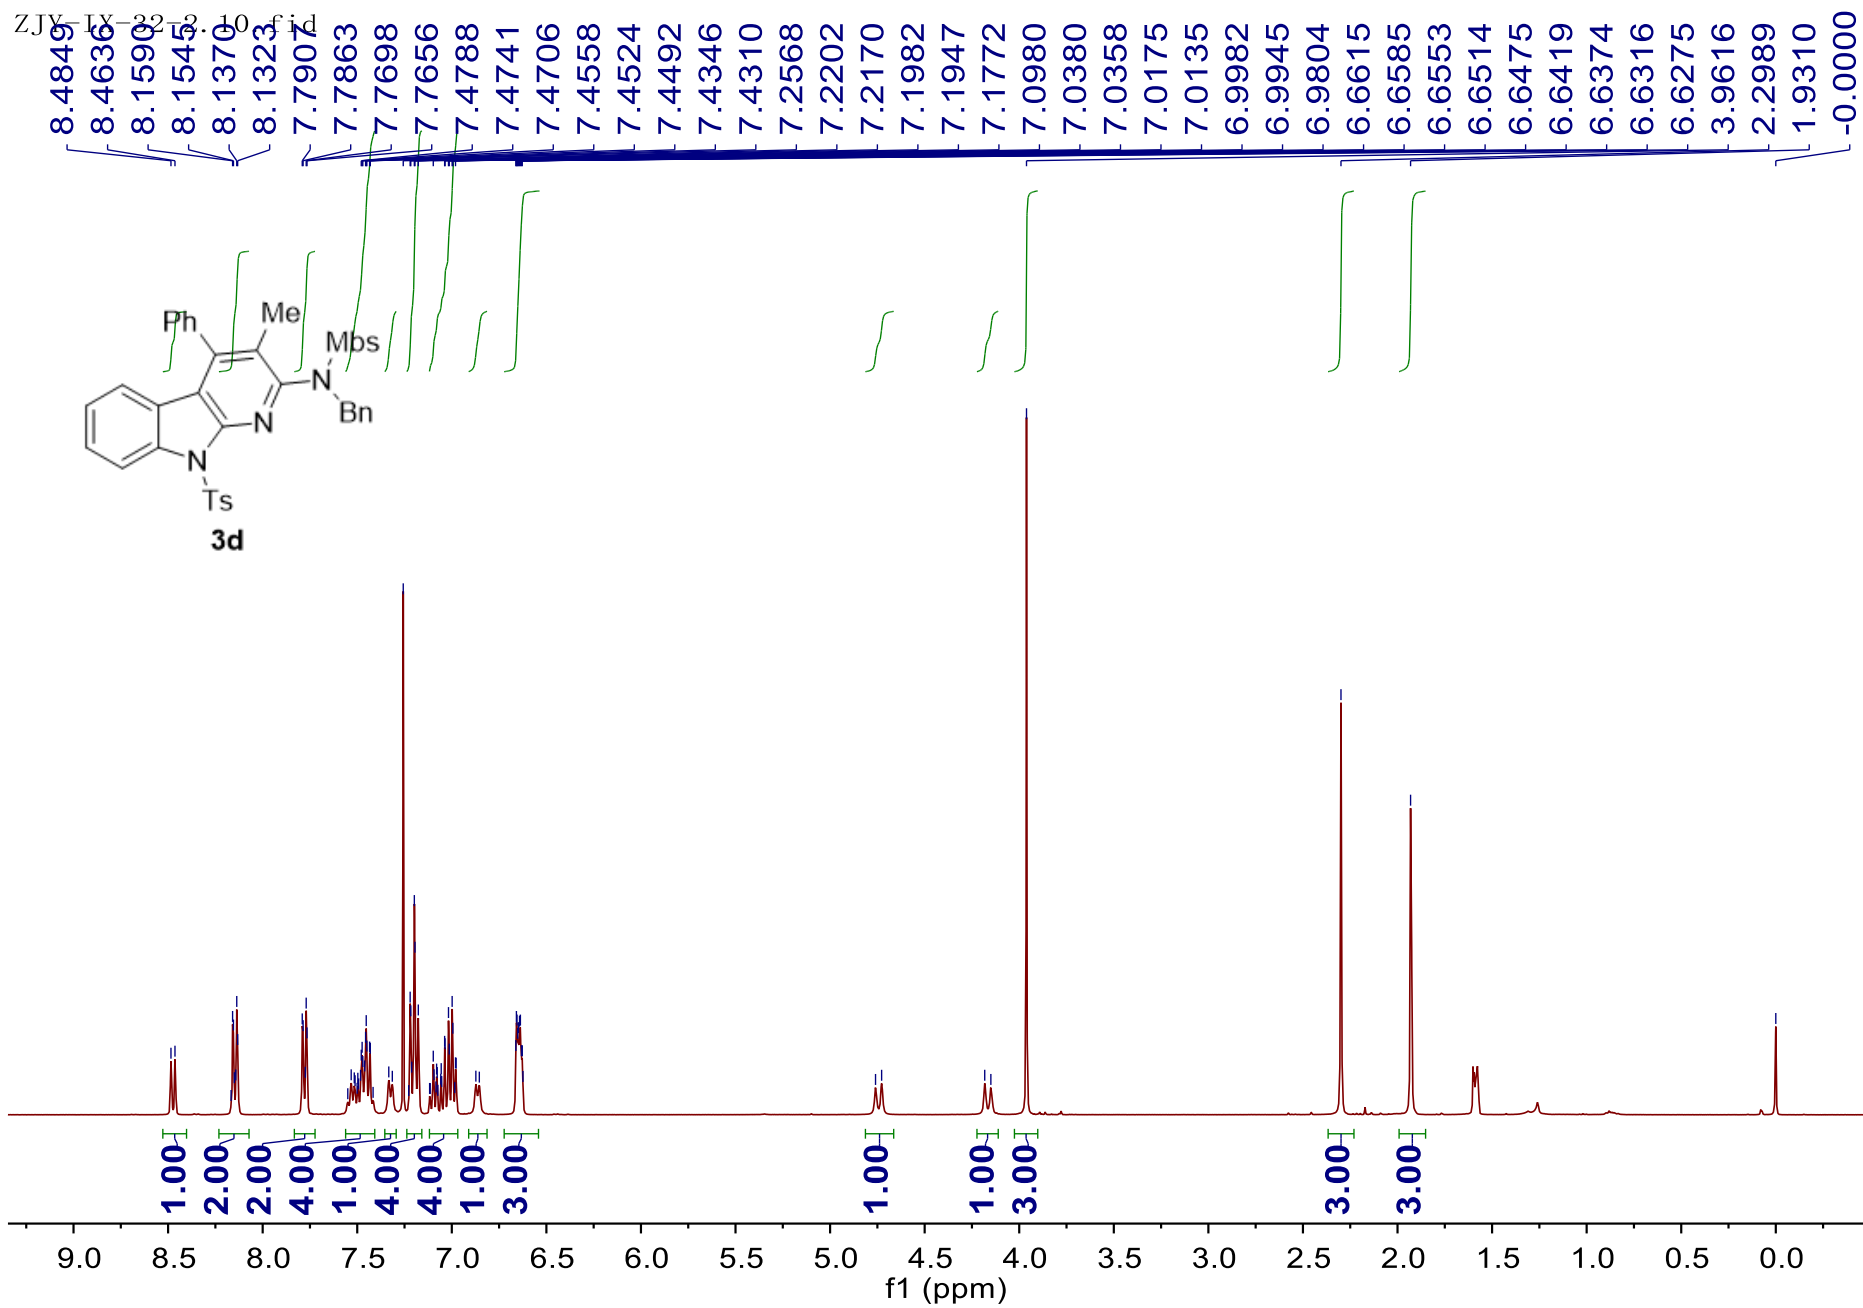



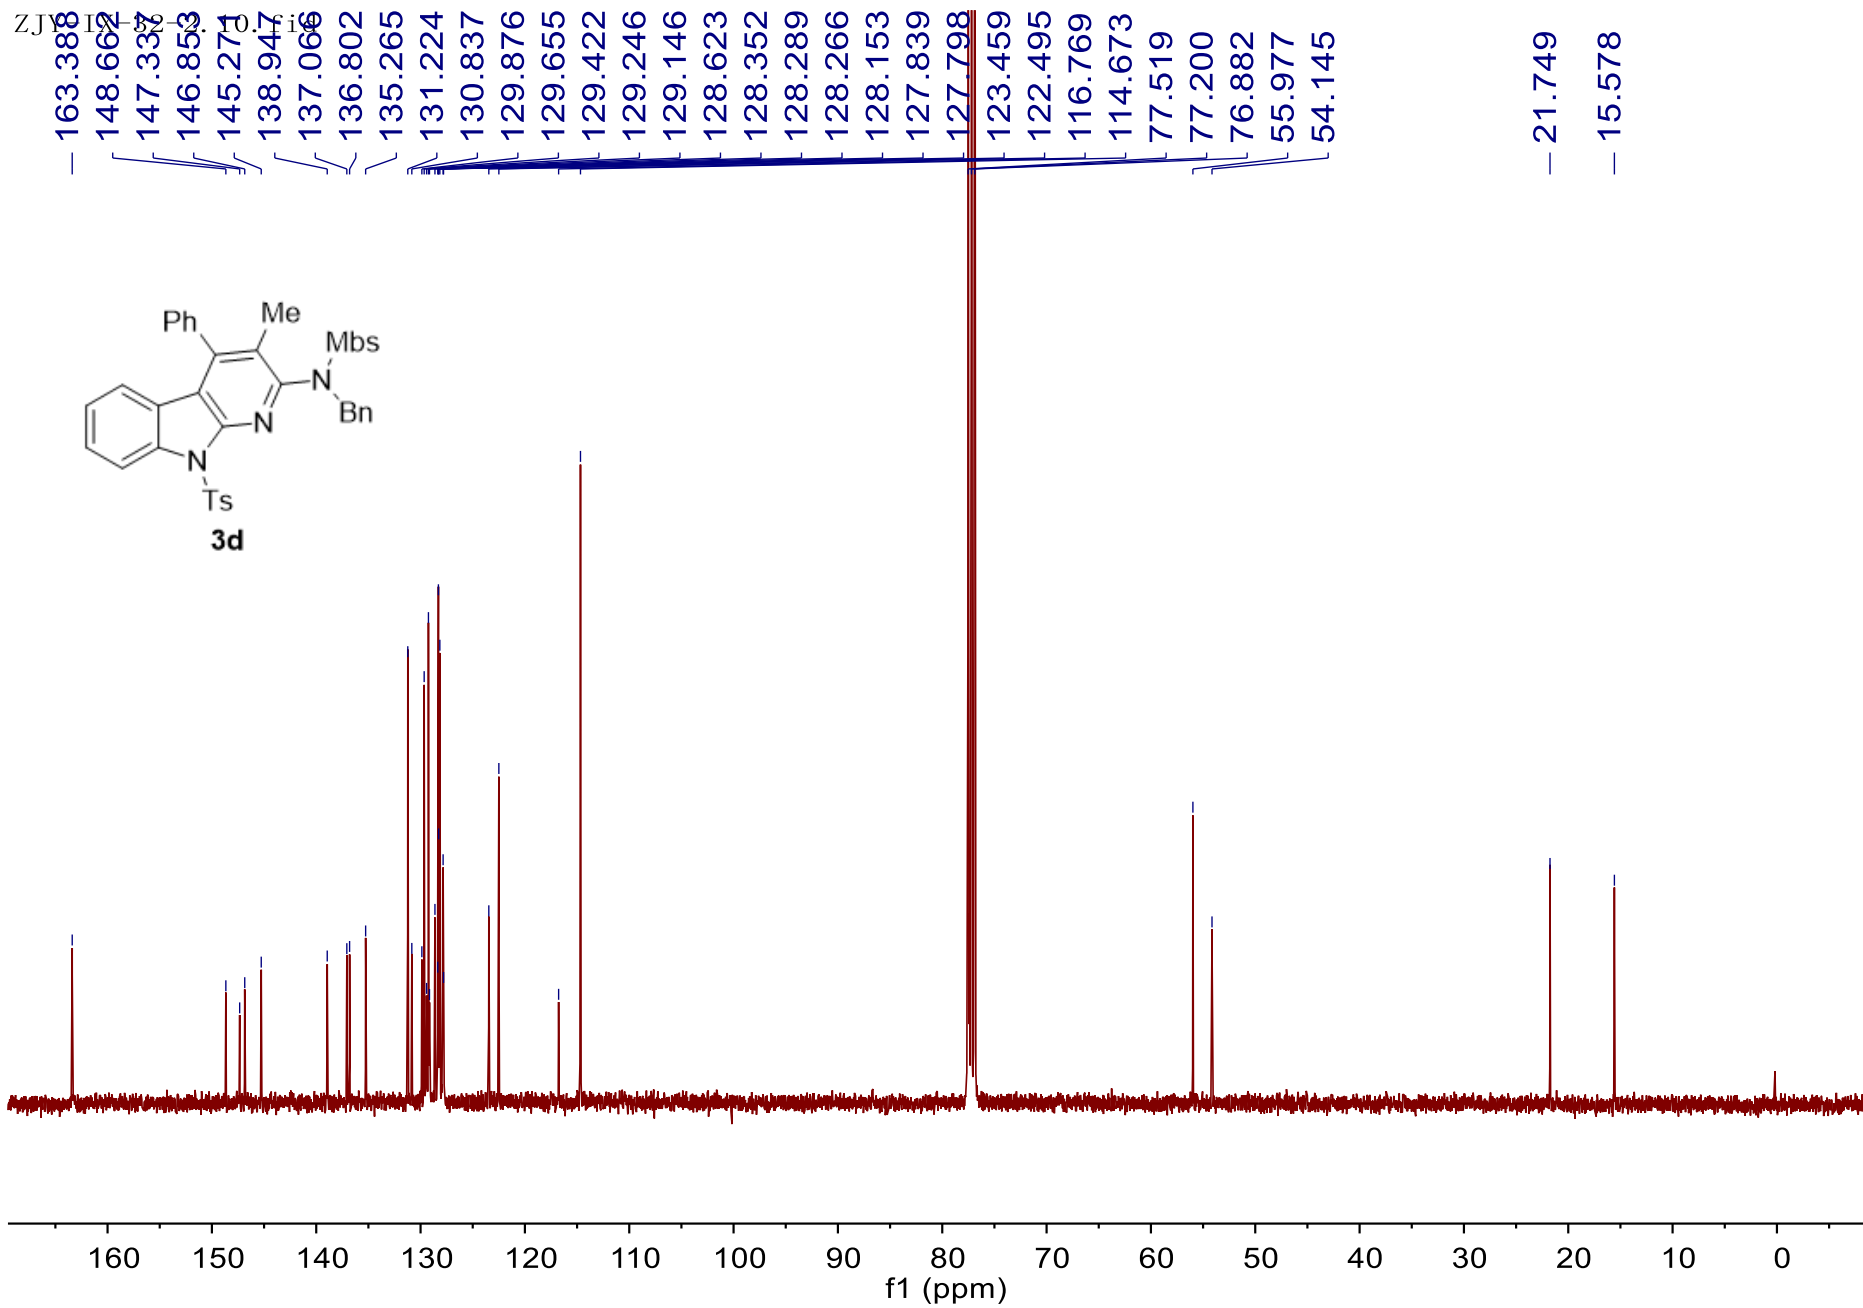

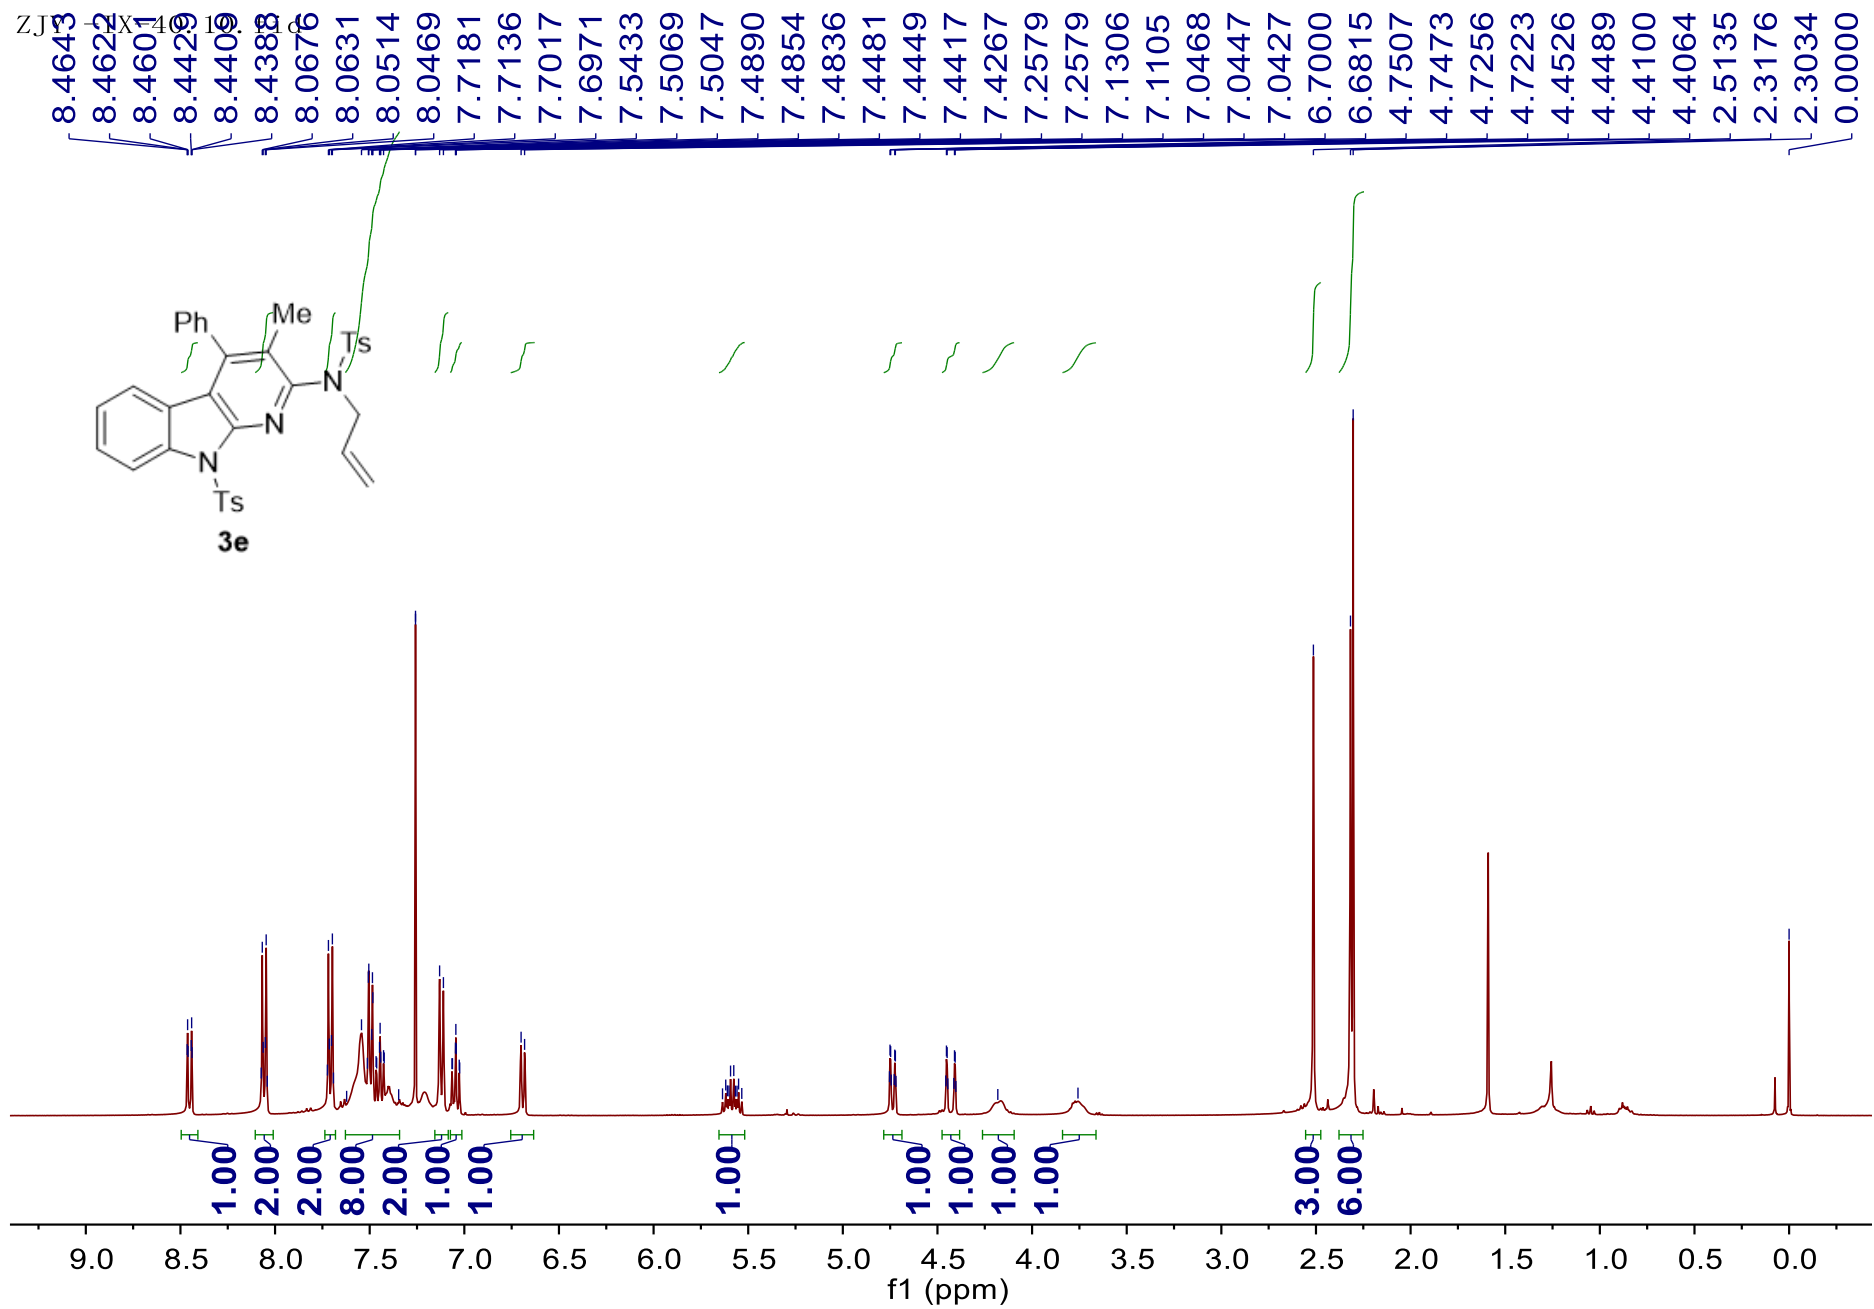

148.781  
147.404  
146.992  
145.019  
143.850  
138.862  
137.175  
136.661  
136.095  
132.283  
129.983  
129.519  
129.443  
129.076  
128.743  
128.255  
128.196  
123.466  
122.513  
119.122  
116.881  
114.673  
77.518  
77.200  
76.882

53.093

21.864  
21.729  
15.951

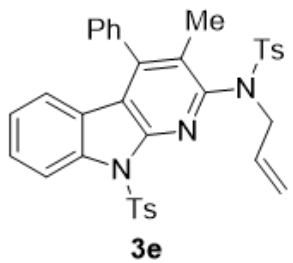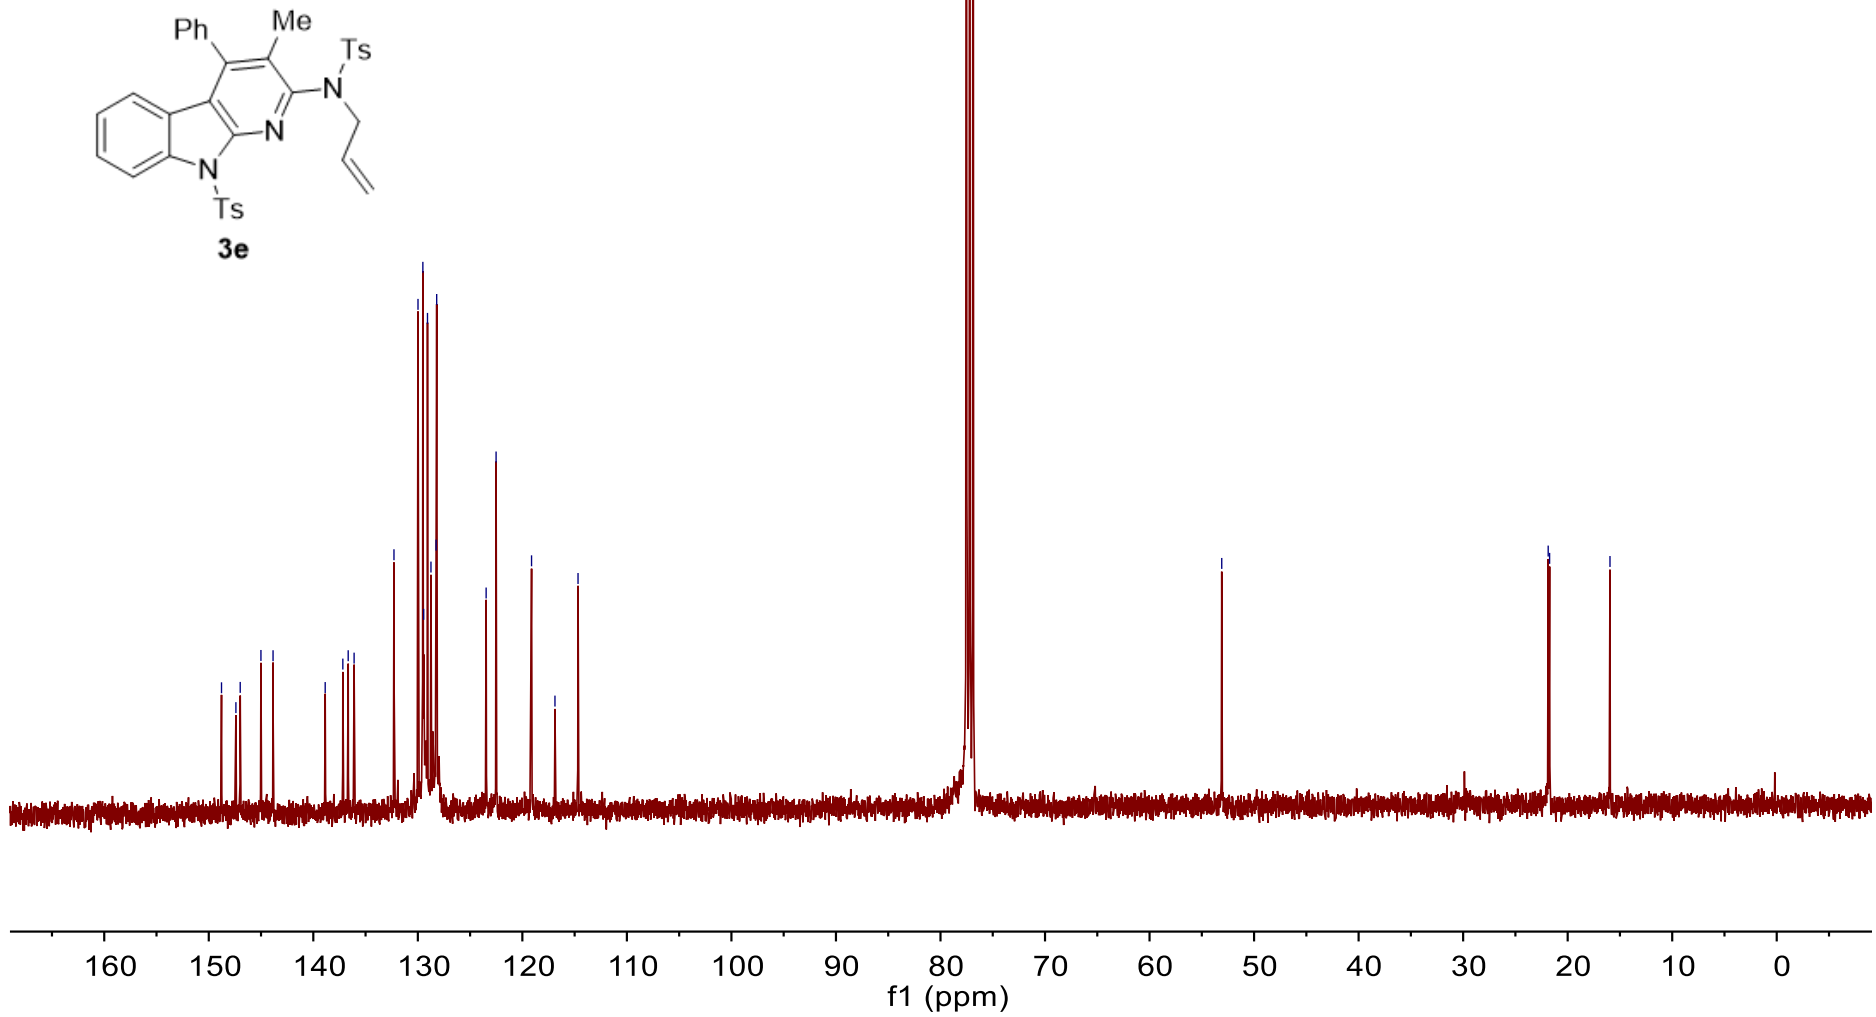

ZJY-IX-37-10.fid

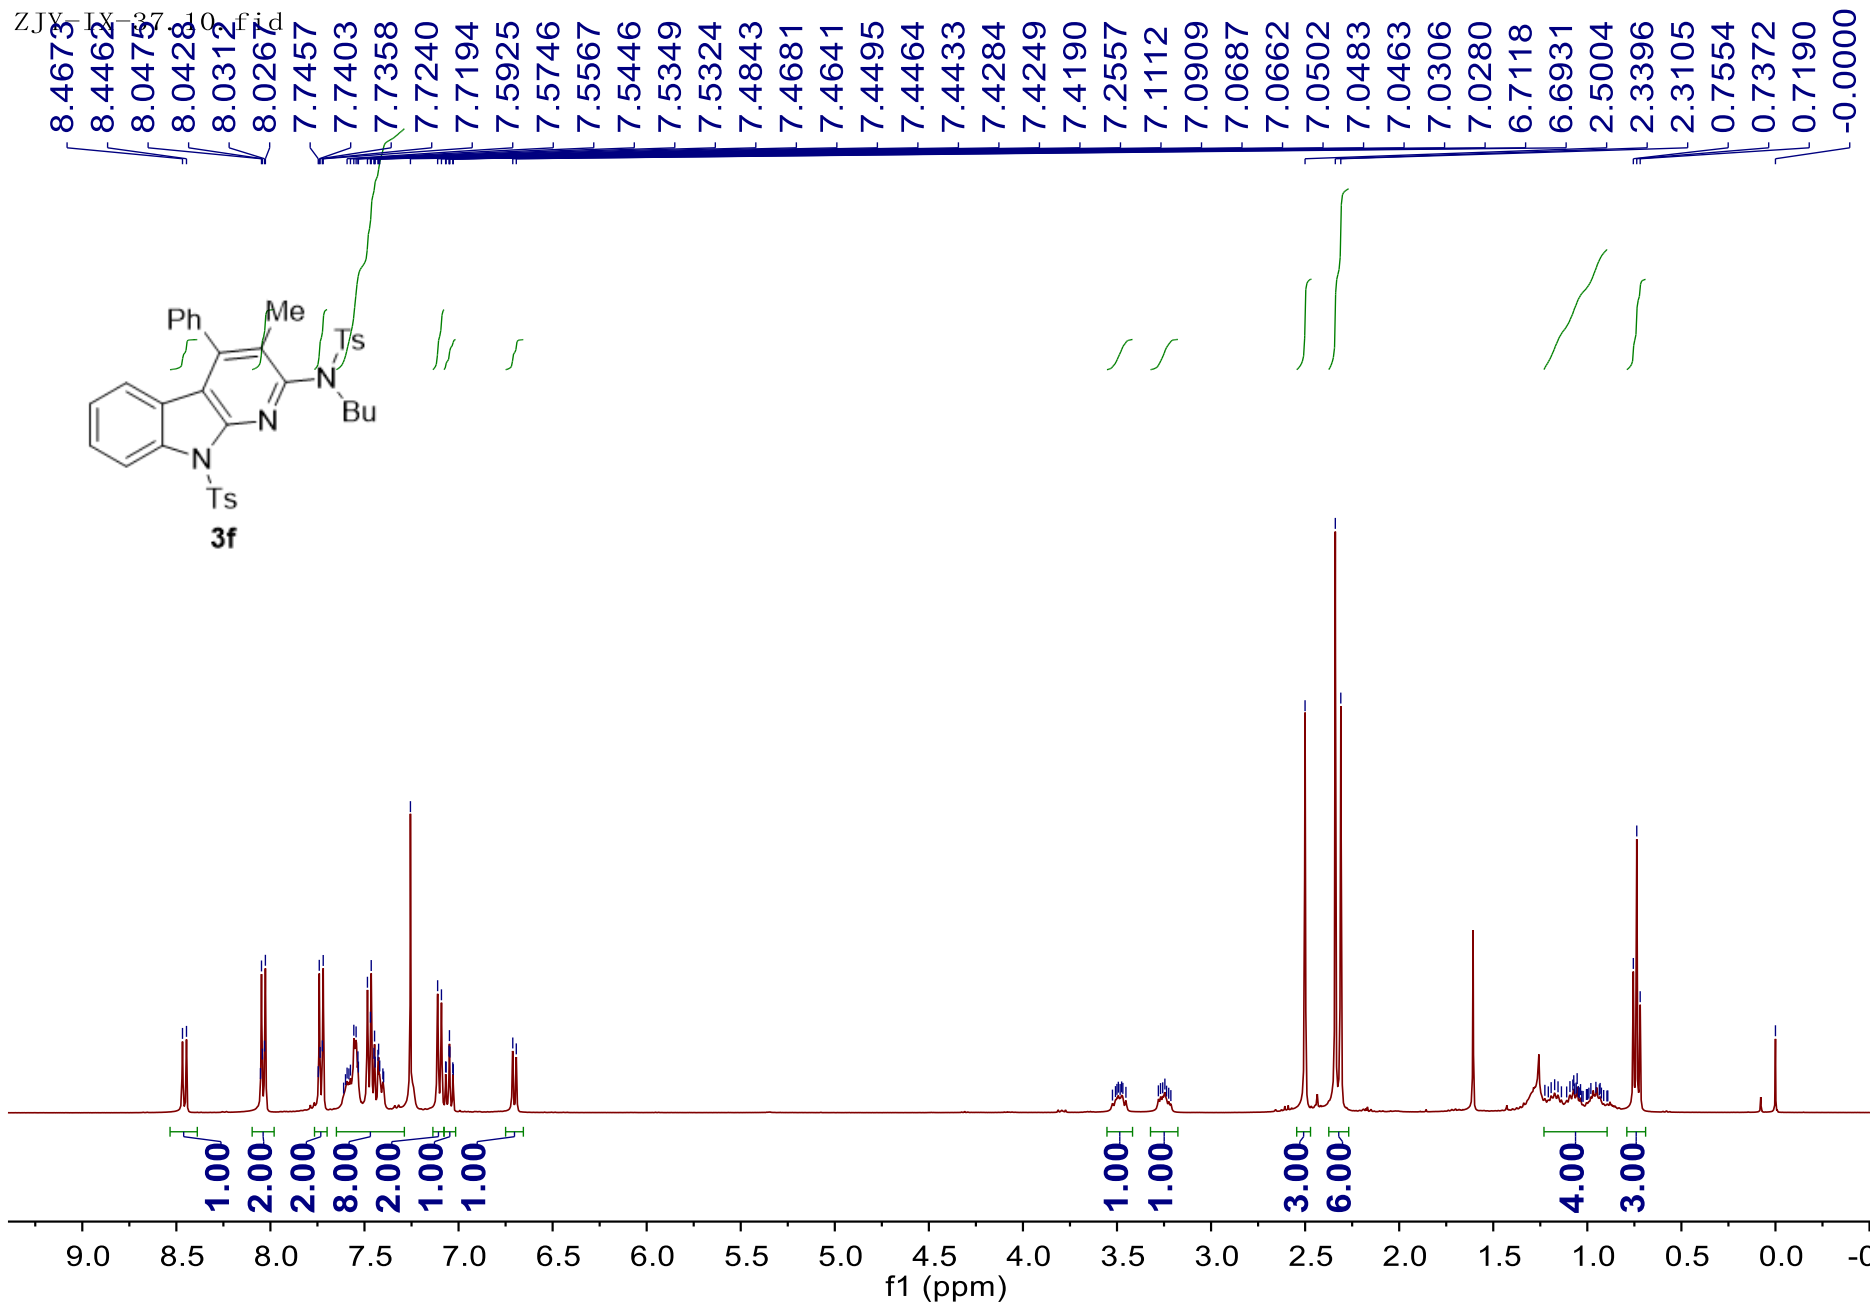

ZJY-XX-87-11-11-11

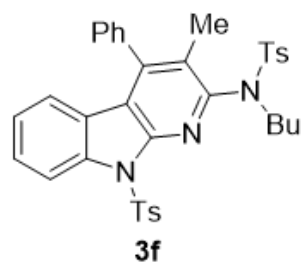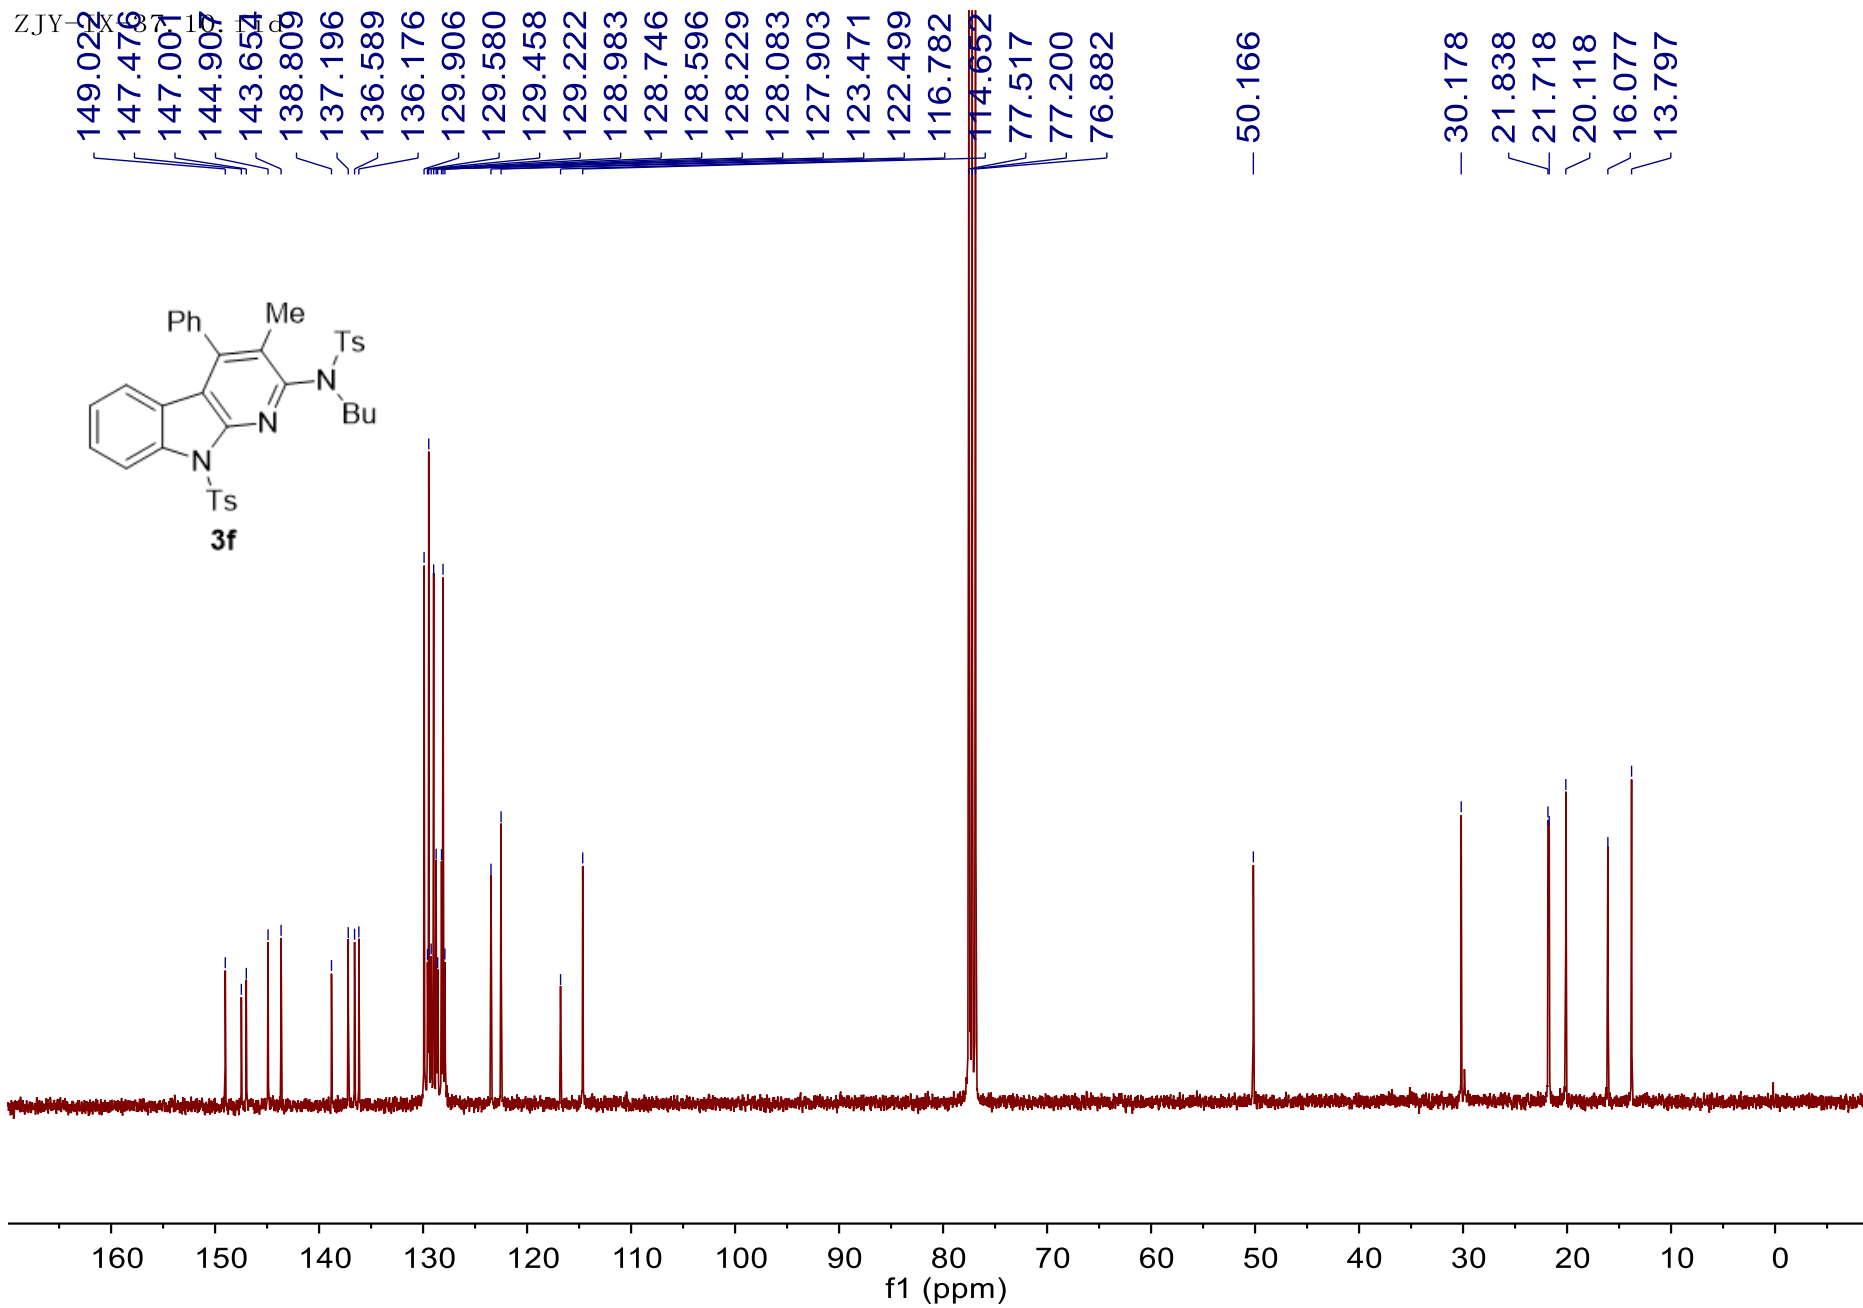

S80

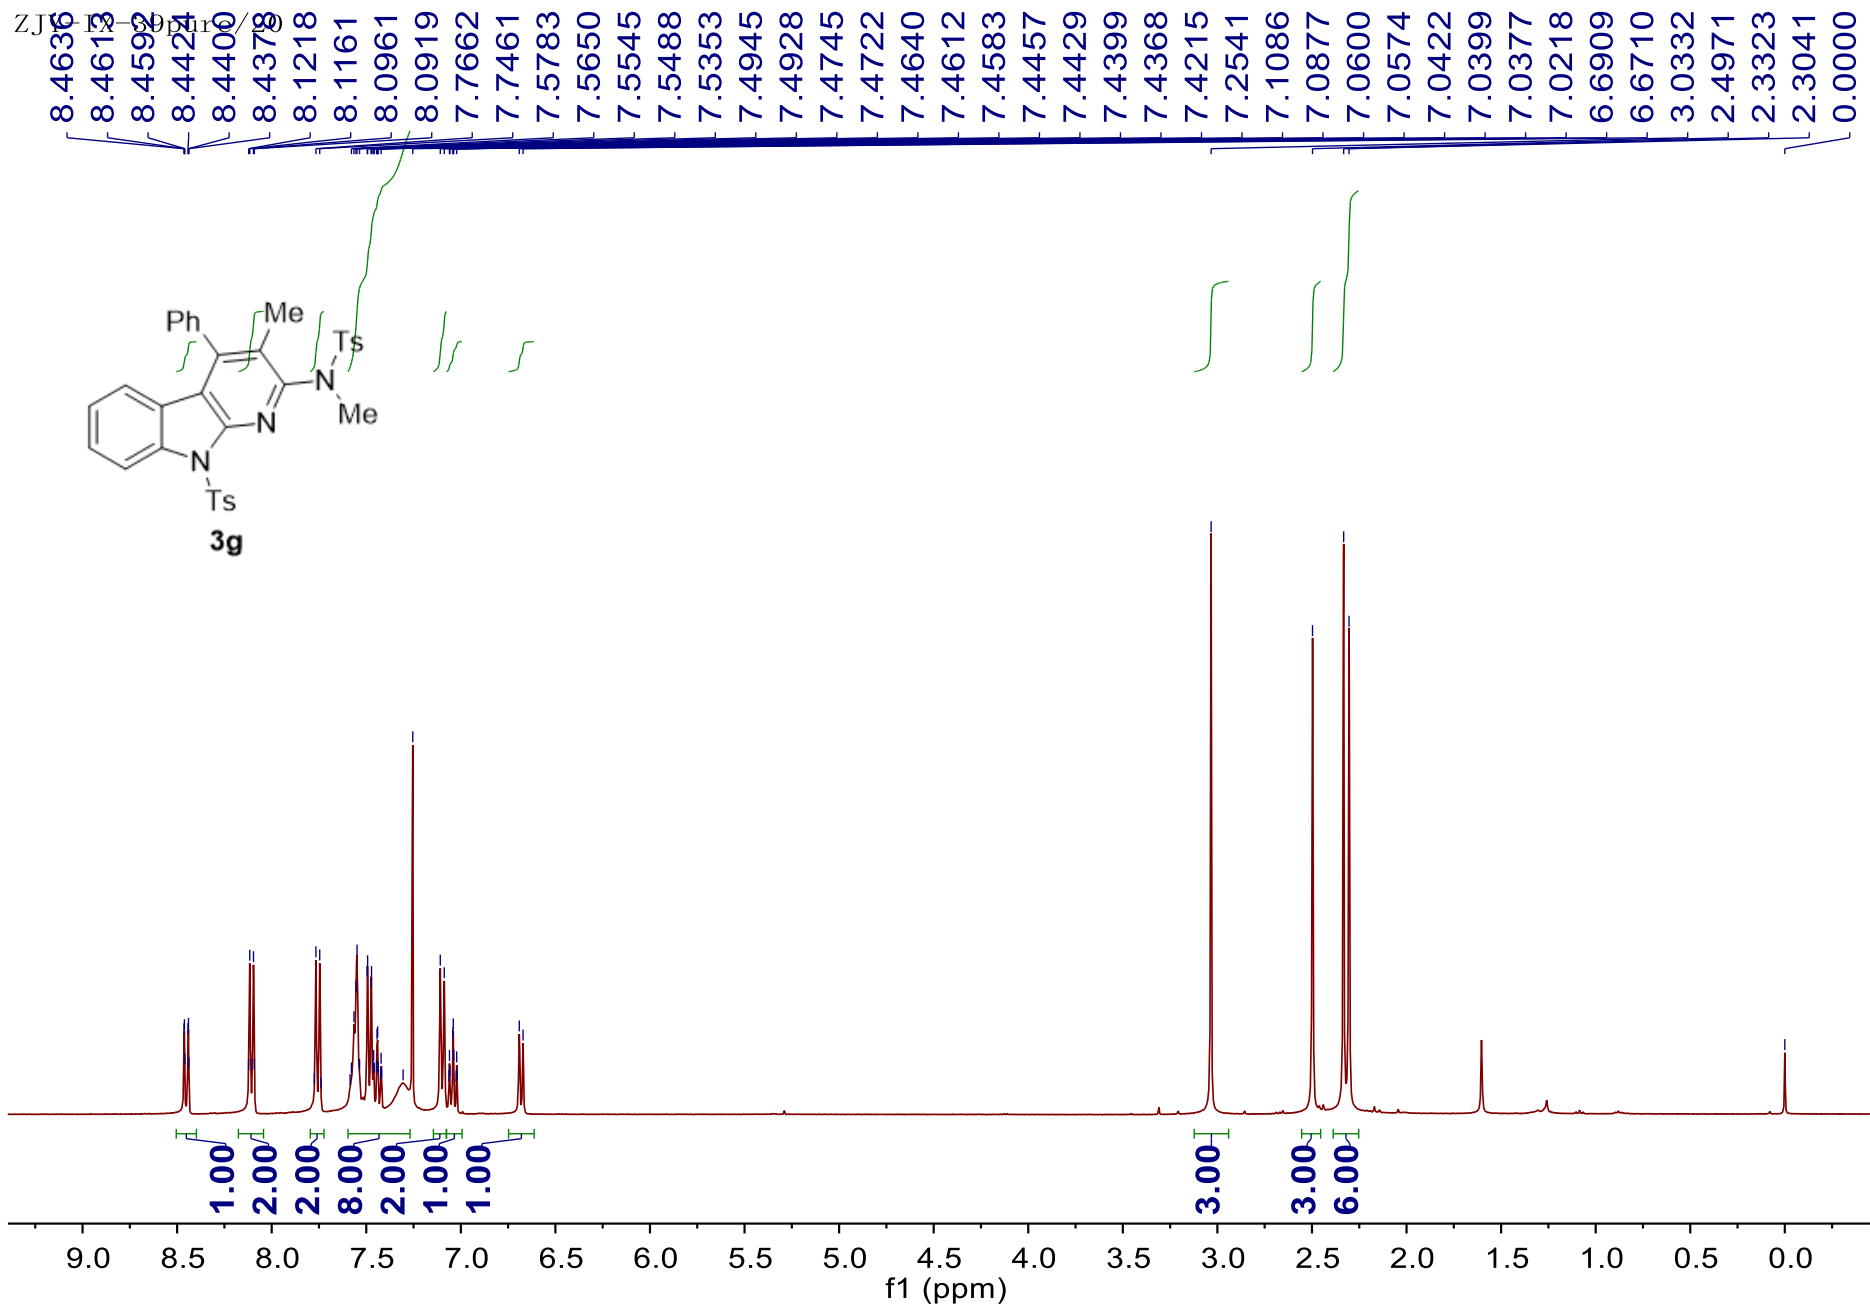

150.484  
147.476  
147.261  
145.056  
143.842  
138.720  
137.132  
136.264  
135.268  
129.946  
129.451  
129.416  
129.137  
128.770  
128.216  
128.106  
127.876  
123.501  
122.550  
122.491  
117.024  
114.709  
77.518  
77.200  
76.883

— 37.229

21.846  
21.762  
~ 15.762

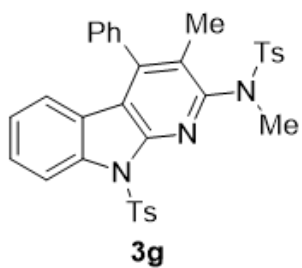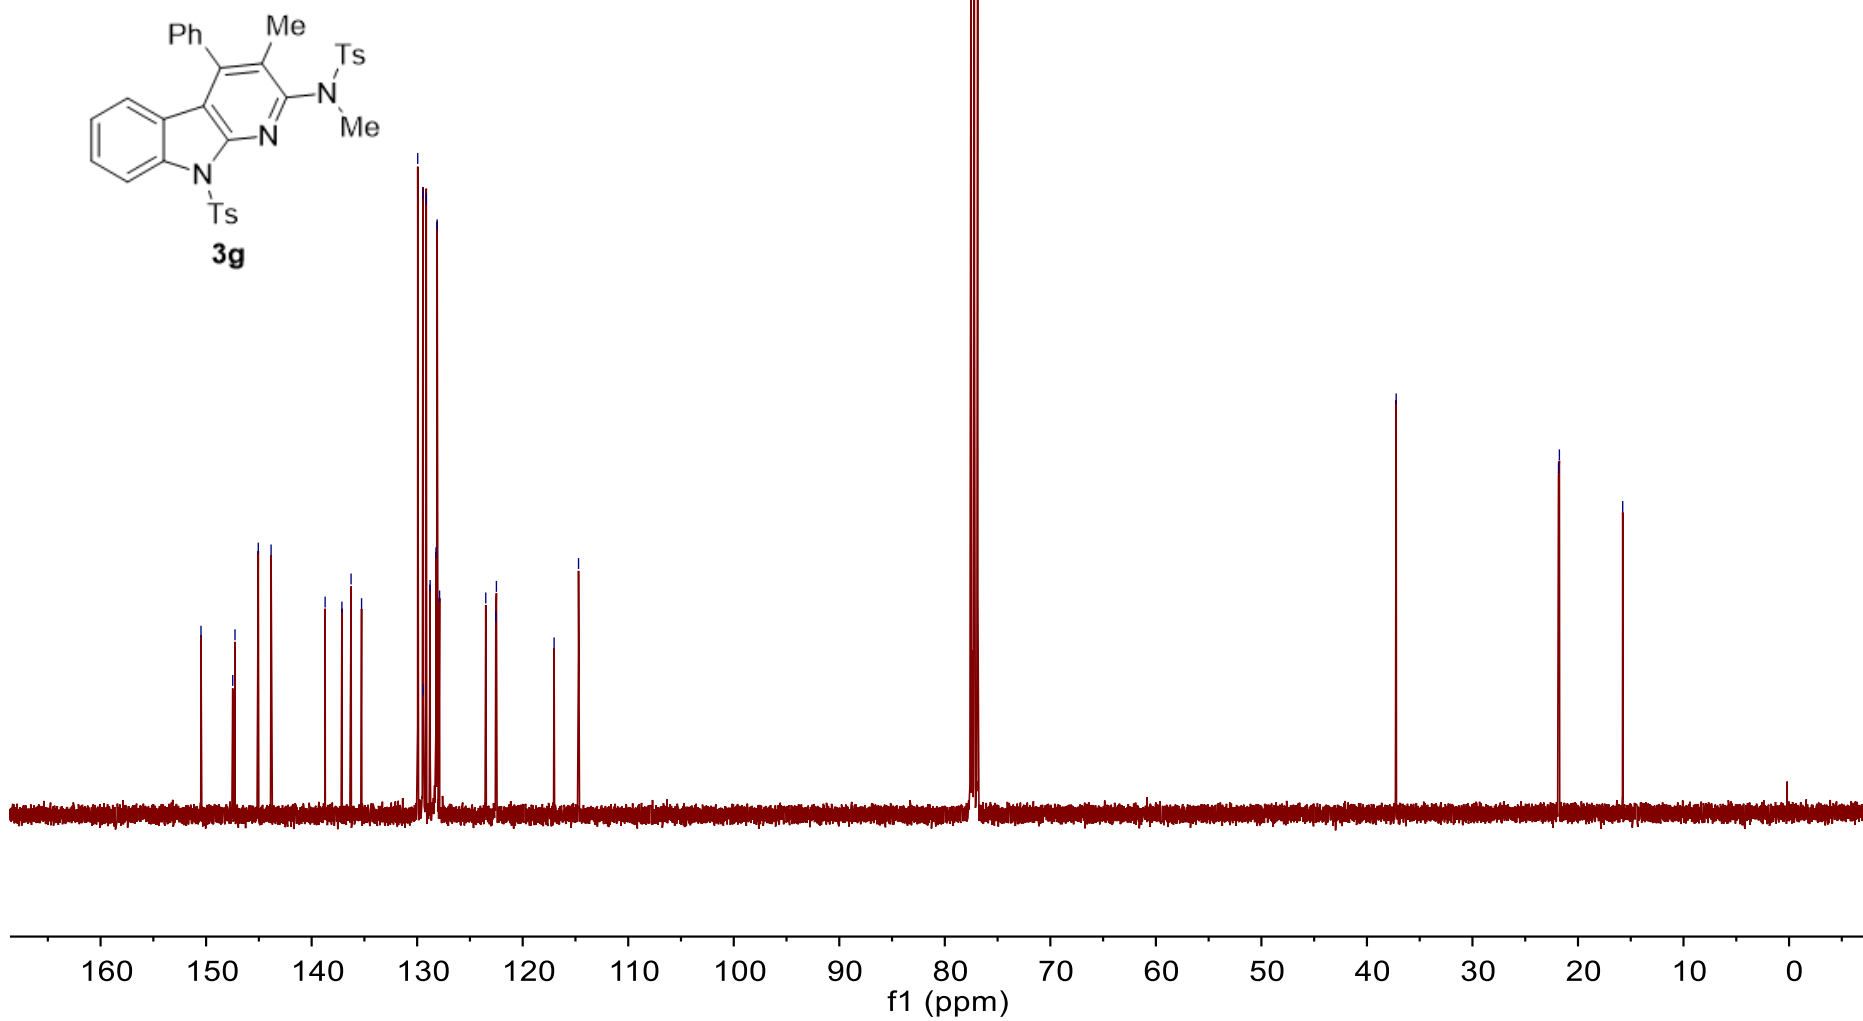

S82

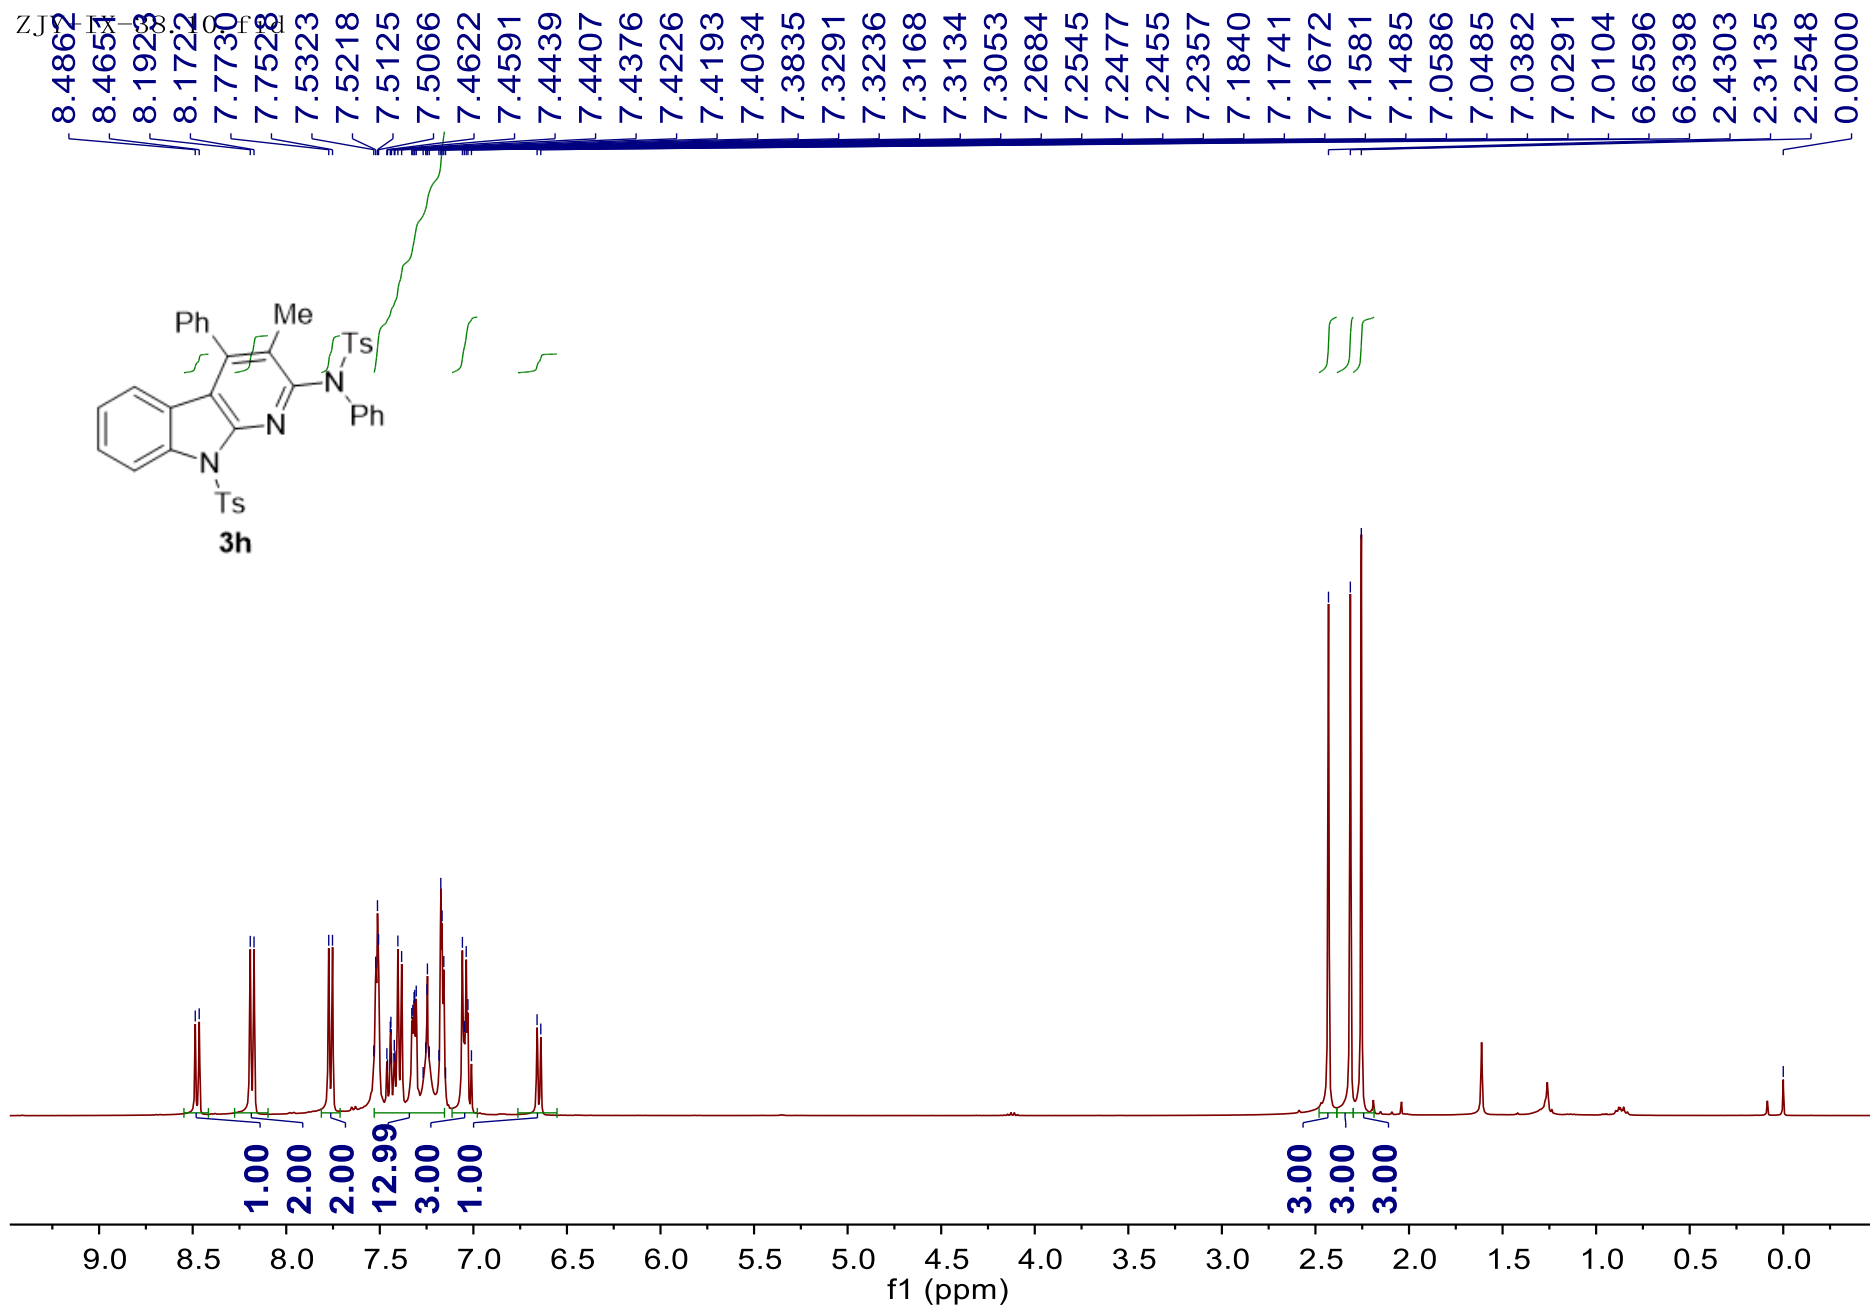



149.704  
147.783  
147.572  
144.945  
143.696  
139.563  
138.722  
136.926  
136.734  
136.195  
129.714  
129.610  
129.392  
129.350  
128.967  
128.785  
128.328  
128.234  
128.109  
127.769  
127.205  
126.899  
123.641  
122.565  
122.519  
117.483  
114.757  
77.519  
77.200  
76.884

21.796  
21.774  
~ 15.289

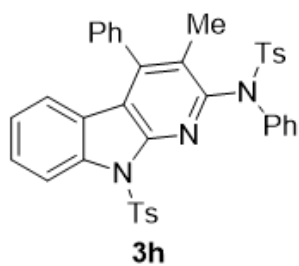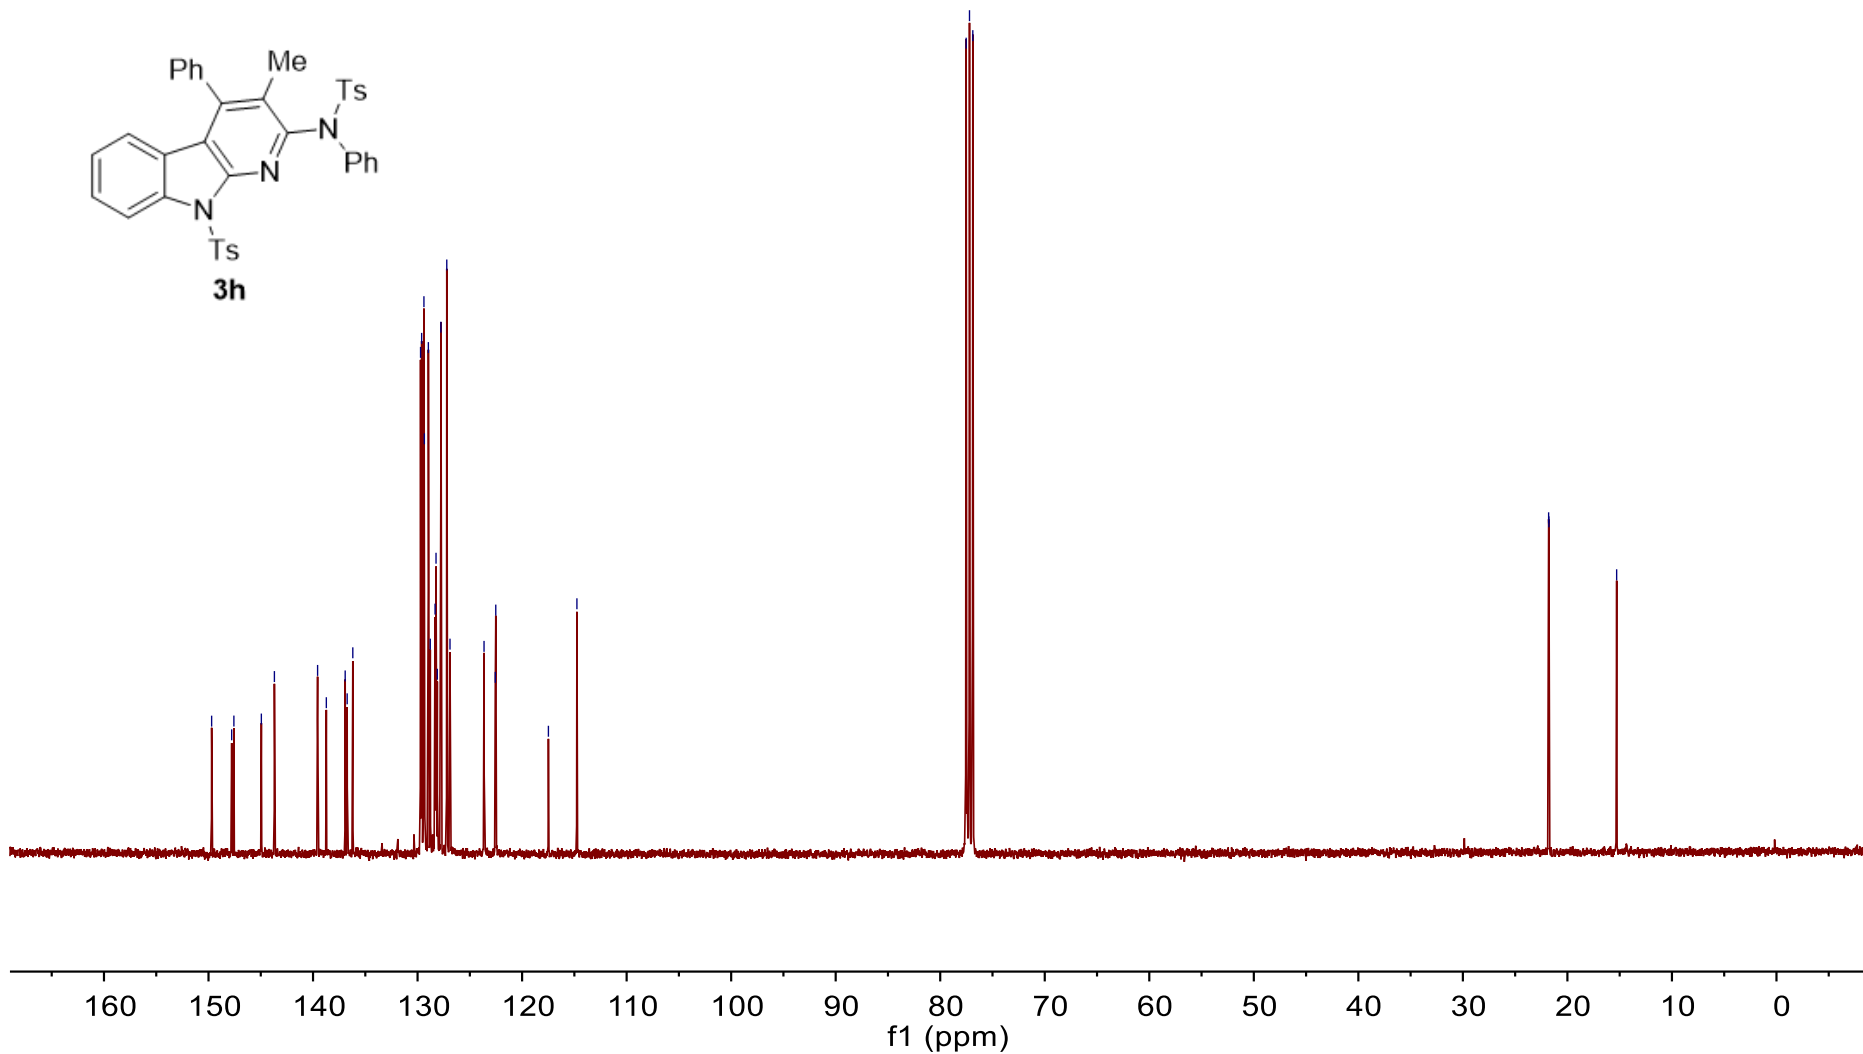

ZJY-IX-16  
Batch No: 2001159

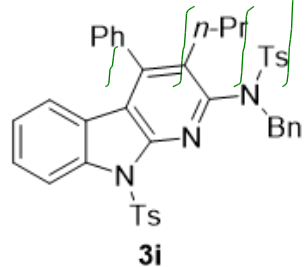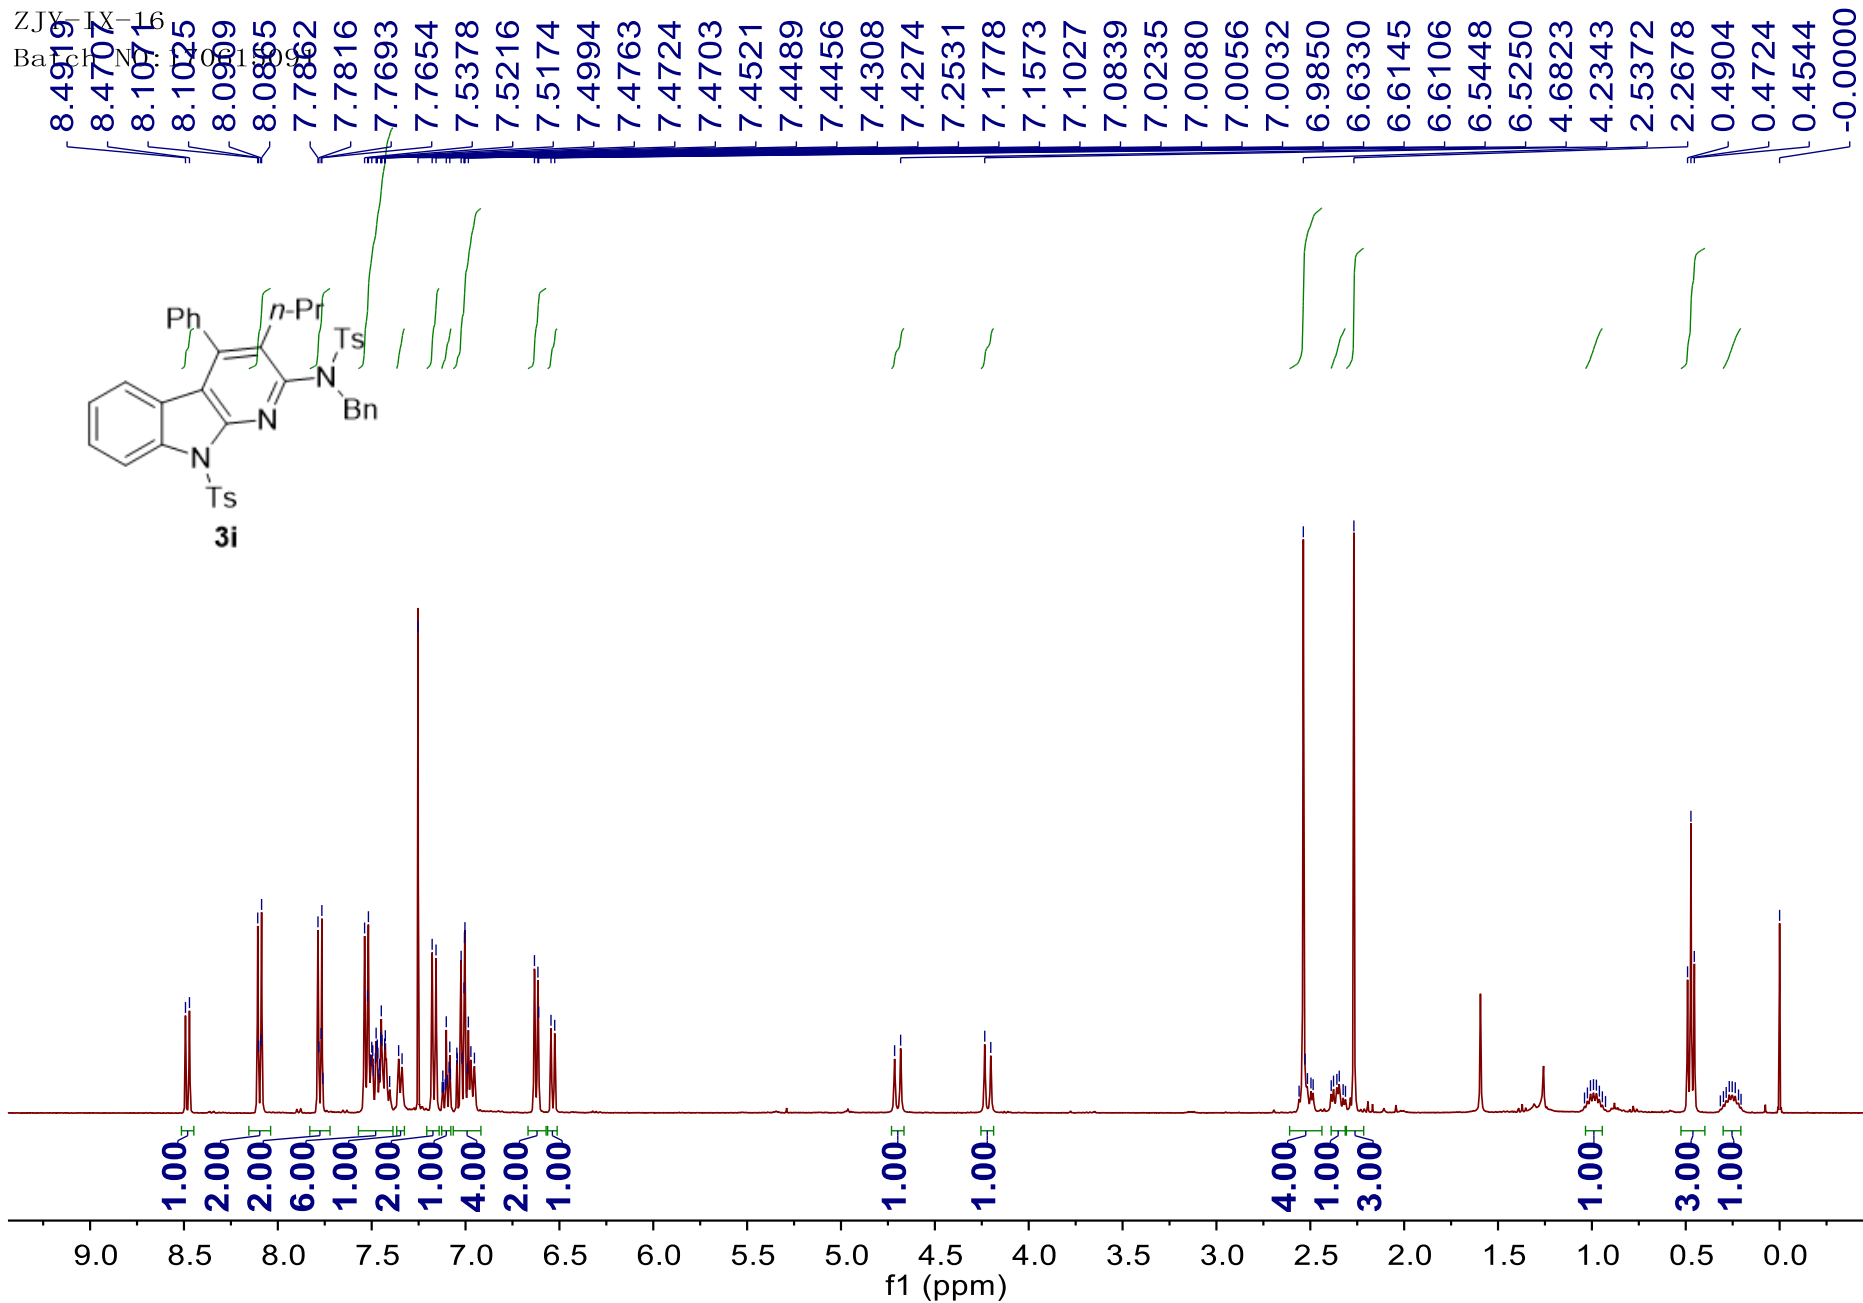

ZJY-18-011f2

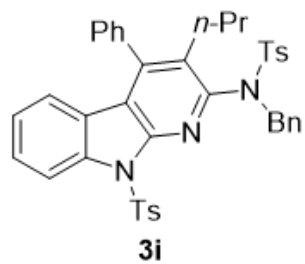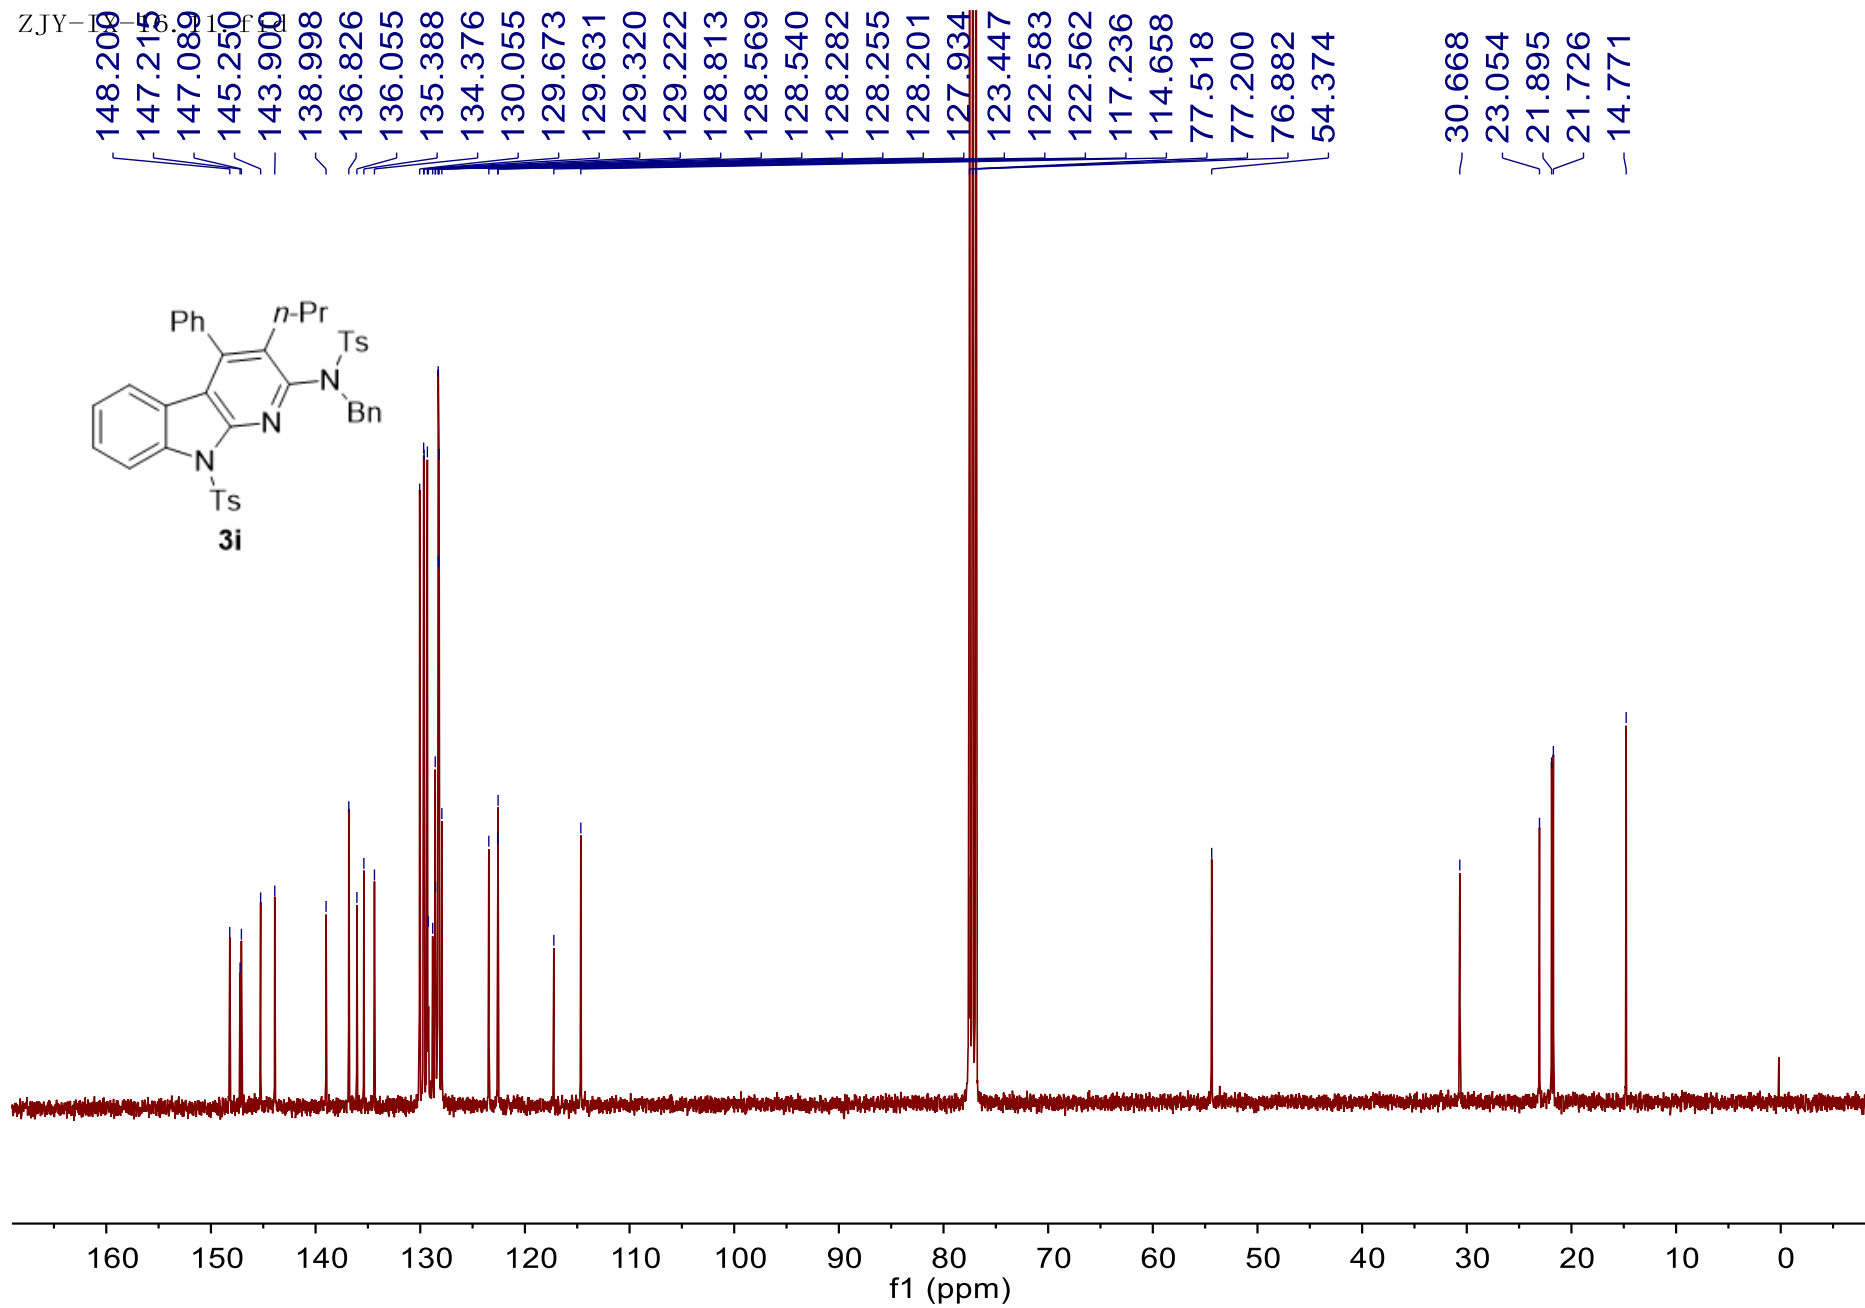

ZJ-13-06-30-off

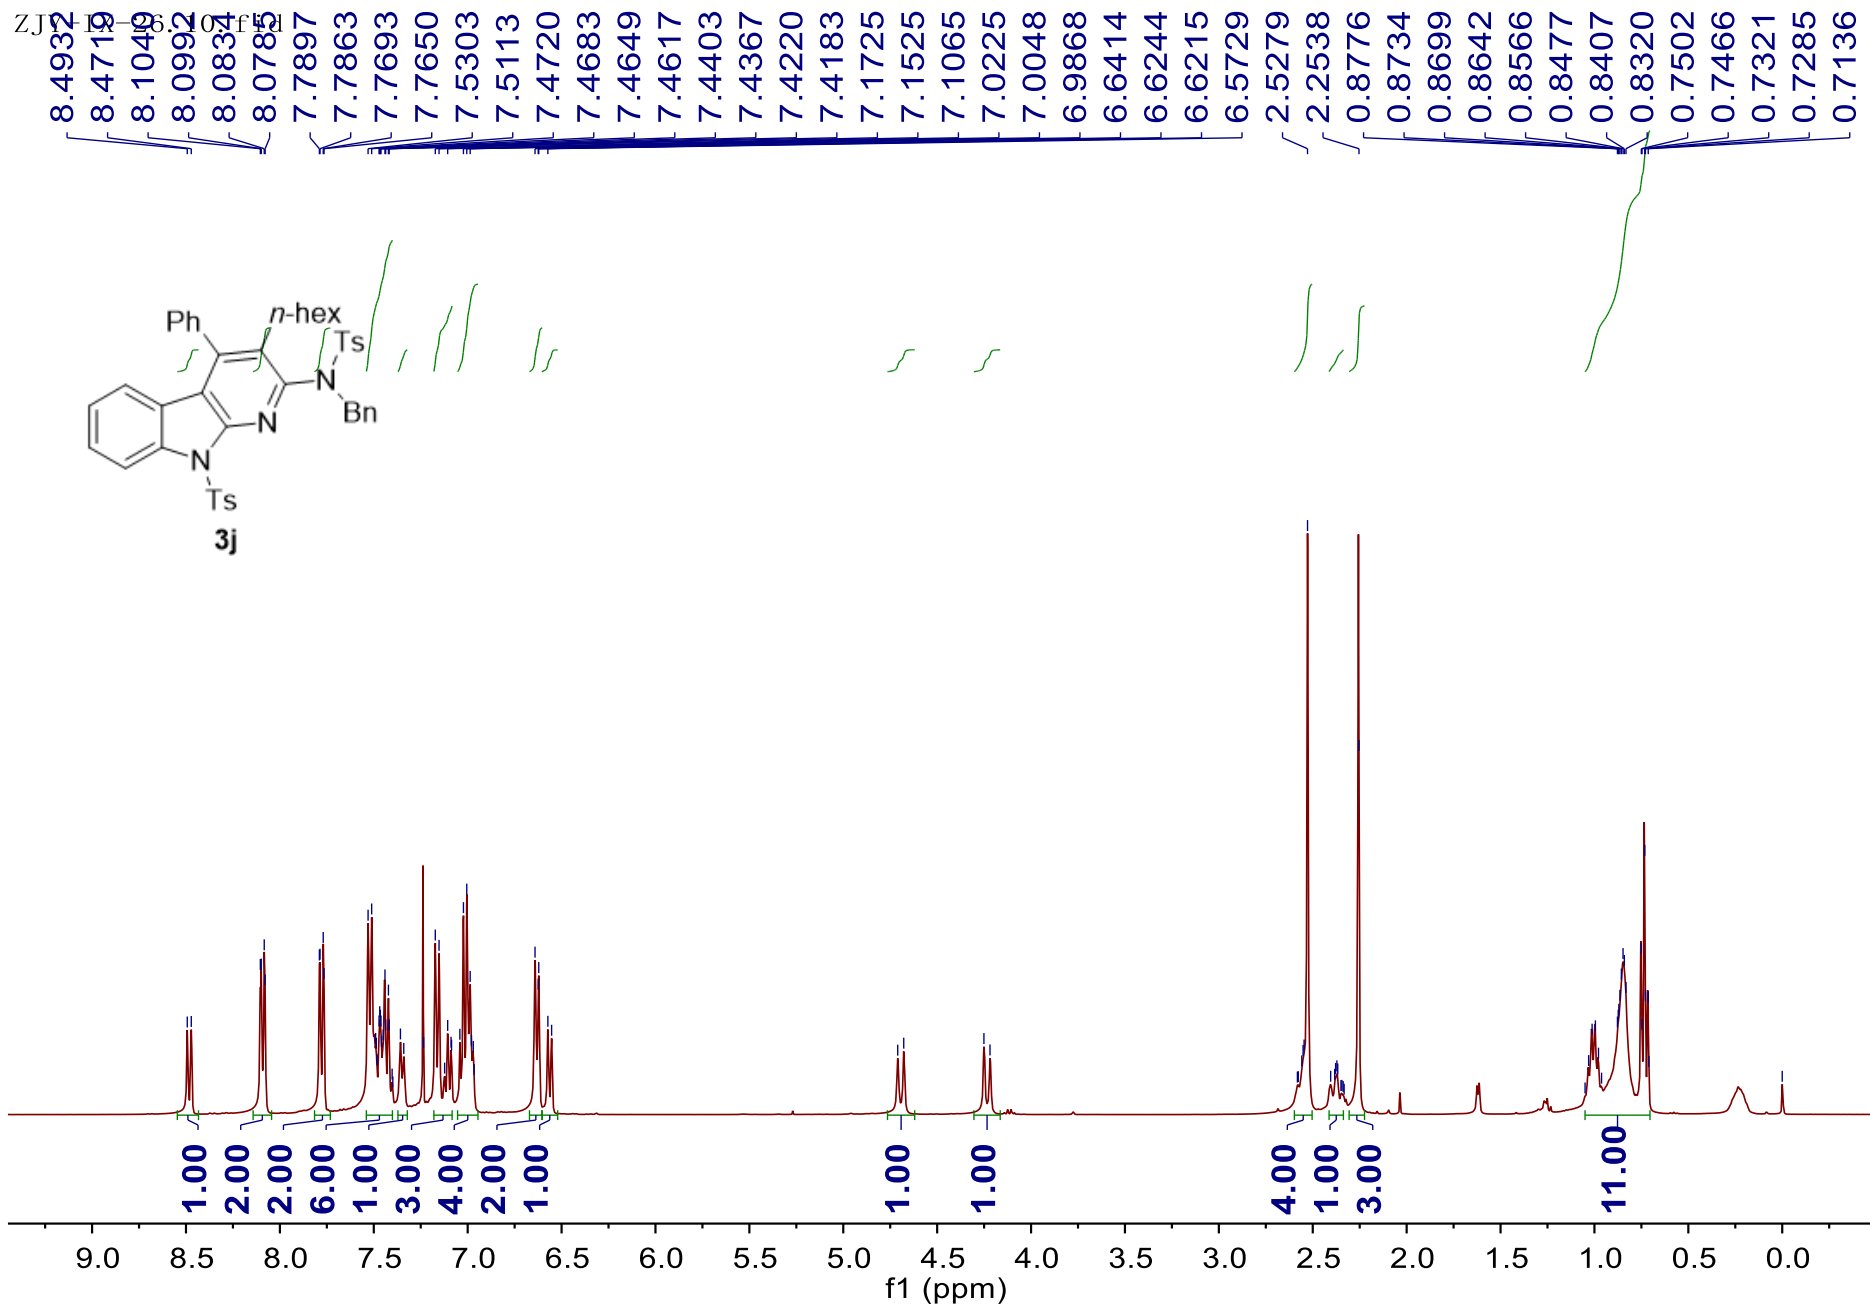

148.175  
 147.177  
 147.051  
 145.234  
 143.866  
 138.972  
 136.792  
 136.741  
 136.034  
 135.413  
 134.503  
 130.028  
 129.657  
 129.623  
 129.285  
 129.191  
 128.771  
 128.542  
 128.301  
 128.248  
 128.214  
 127.925  
 123.425  
 122.563  
 117.204  
 114.629  
 77.519  
 77.200  
 76.883  
 54.315  
 31.028  
 29.675  
 29.377  
 28.490  
 22.428  
 21.872  
 21.699  
 14.159

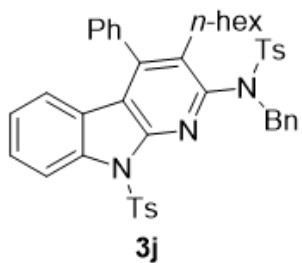

ZJT-IX-27-2.10.fid

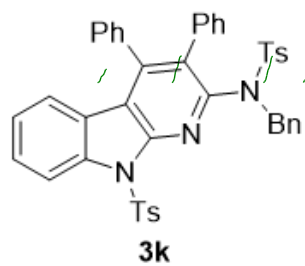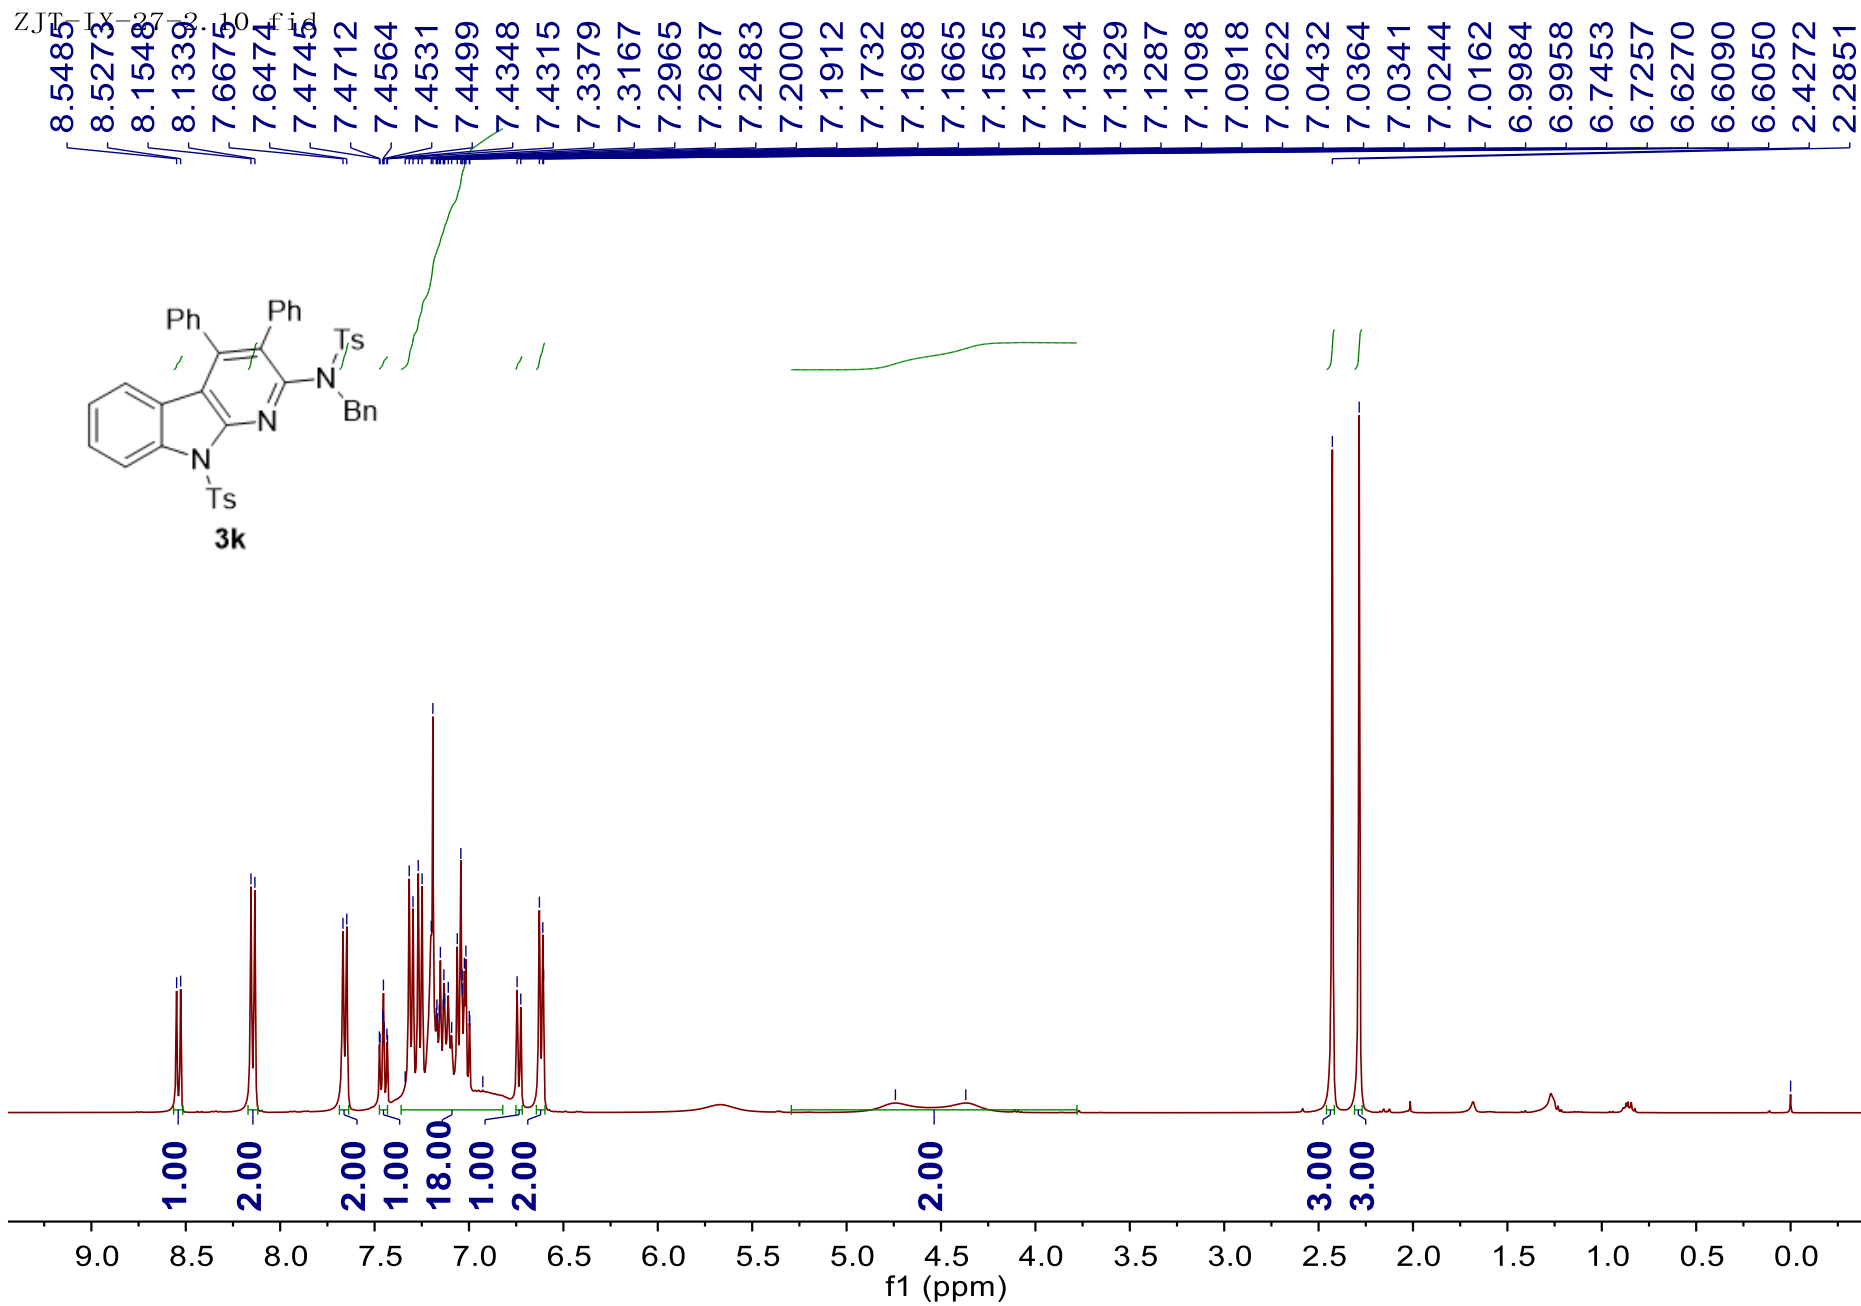

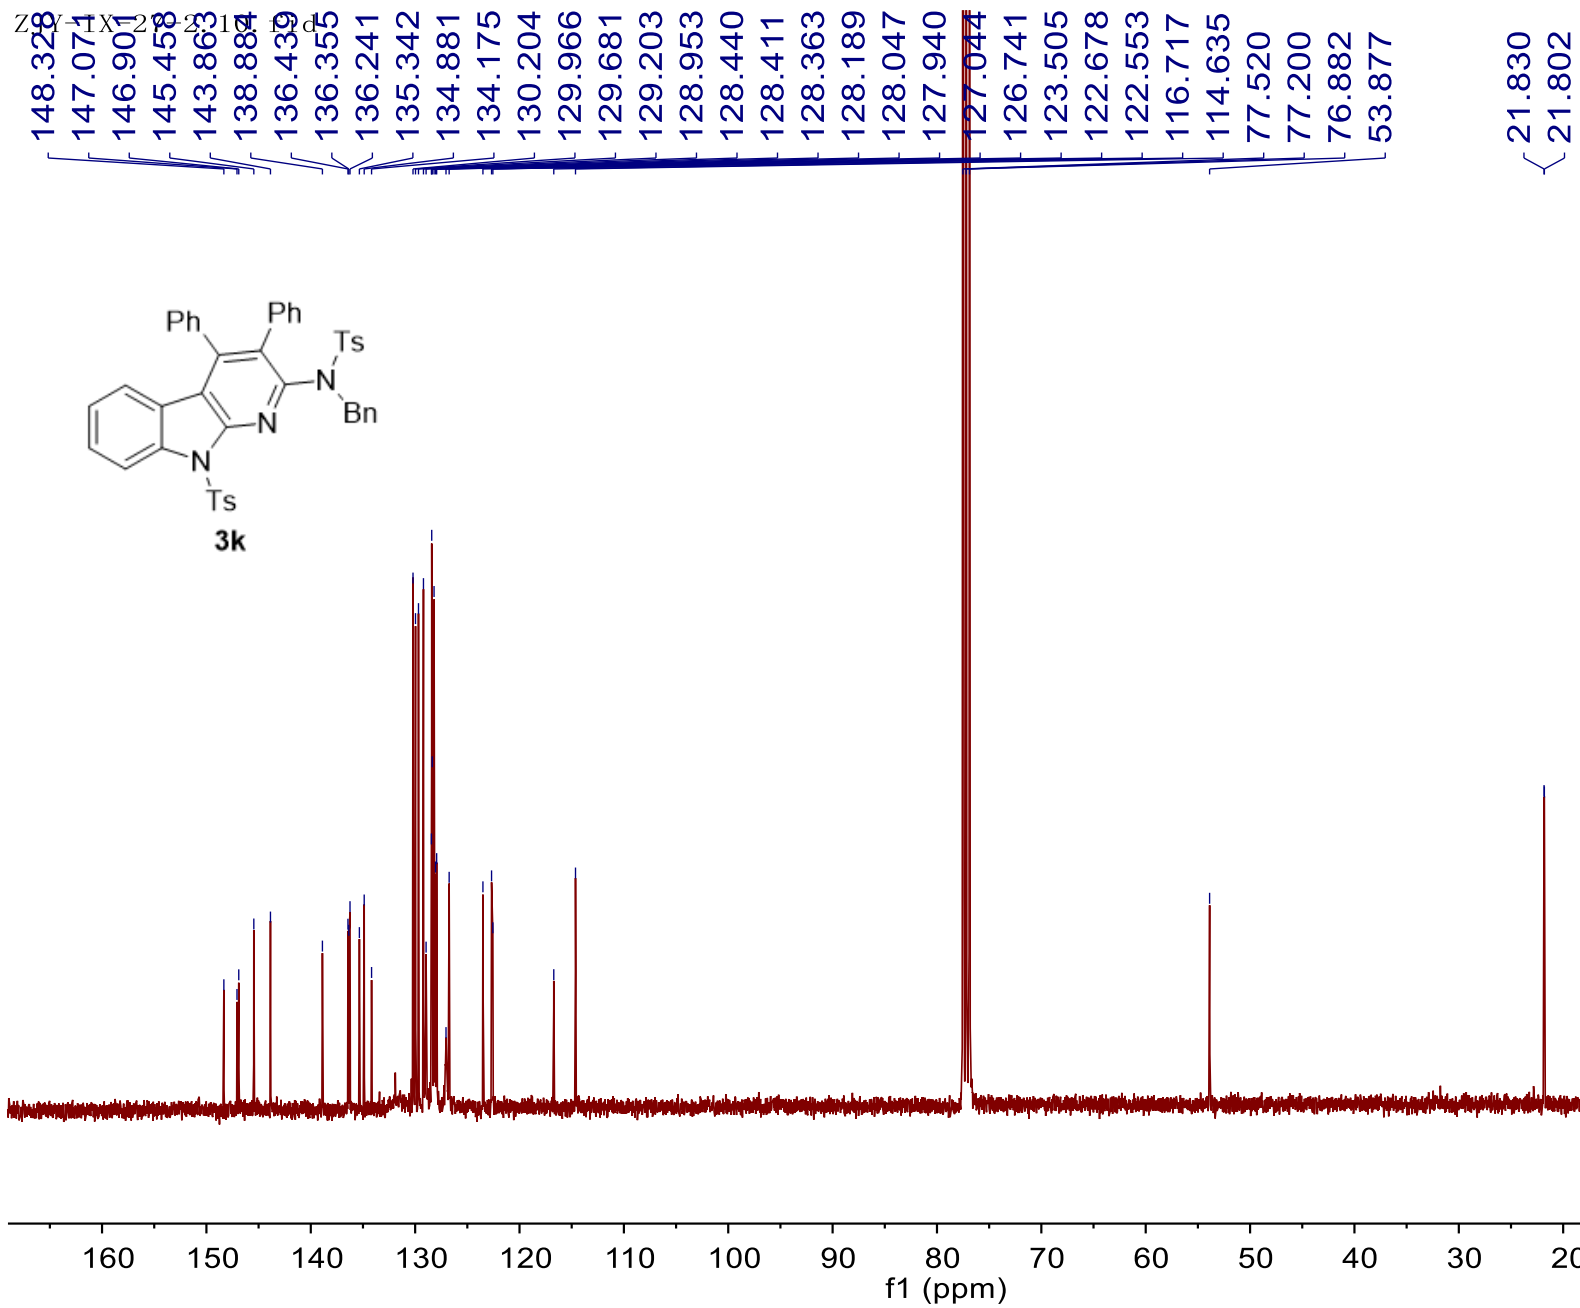

S90

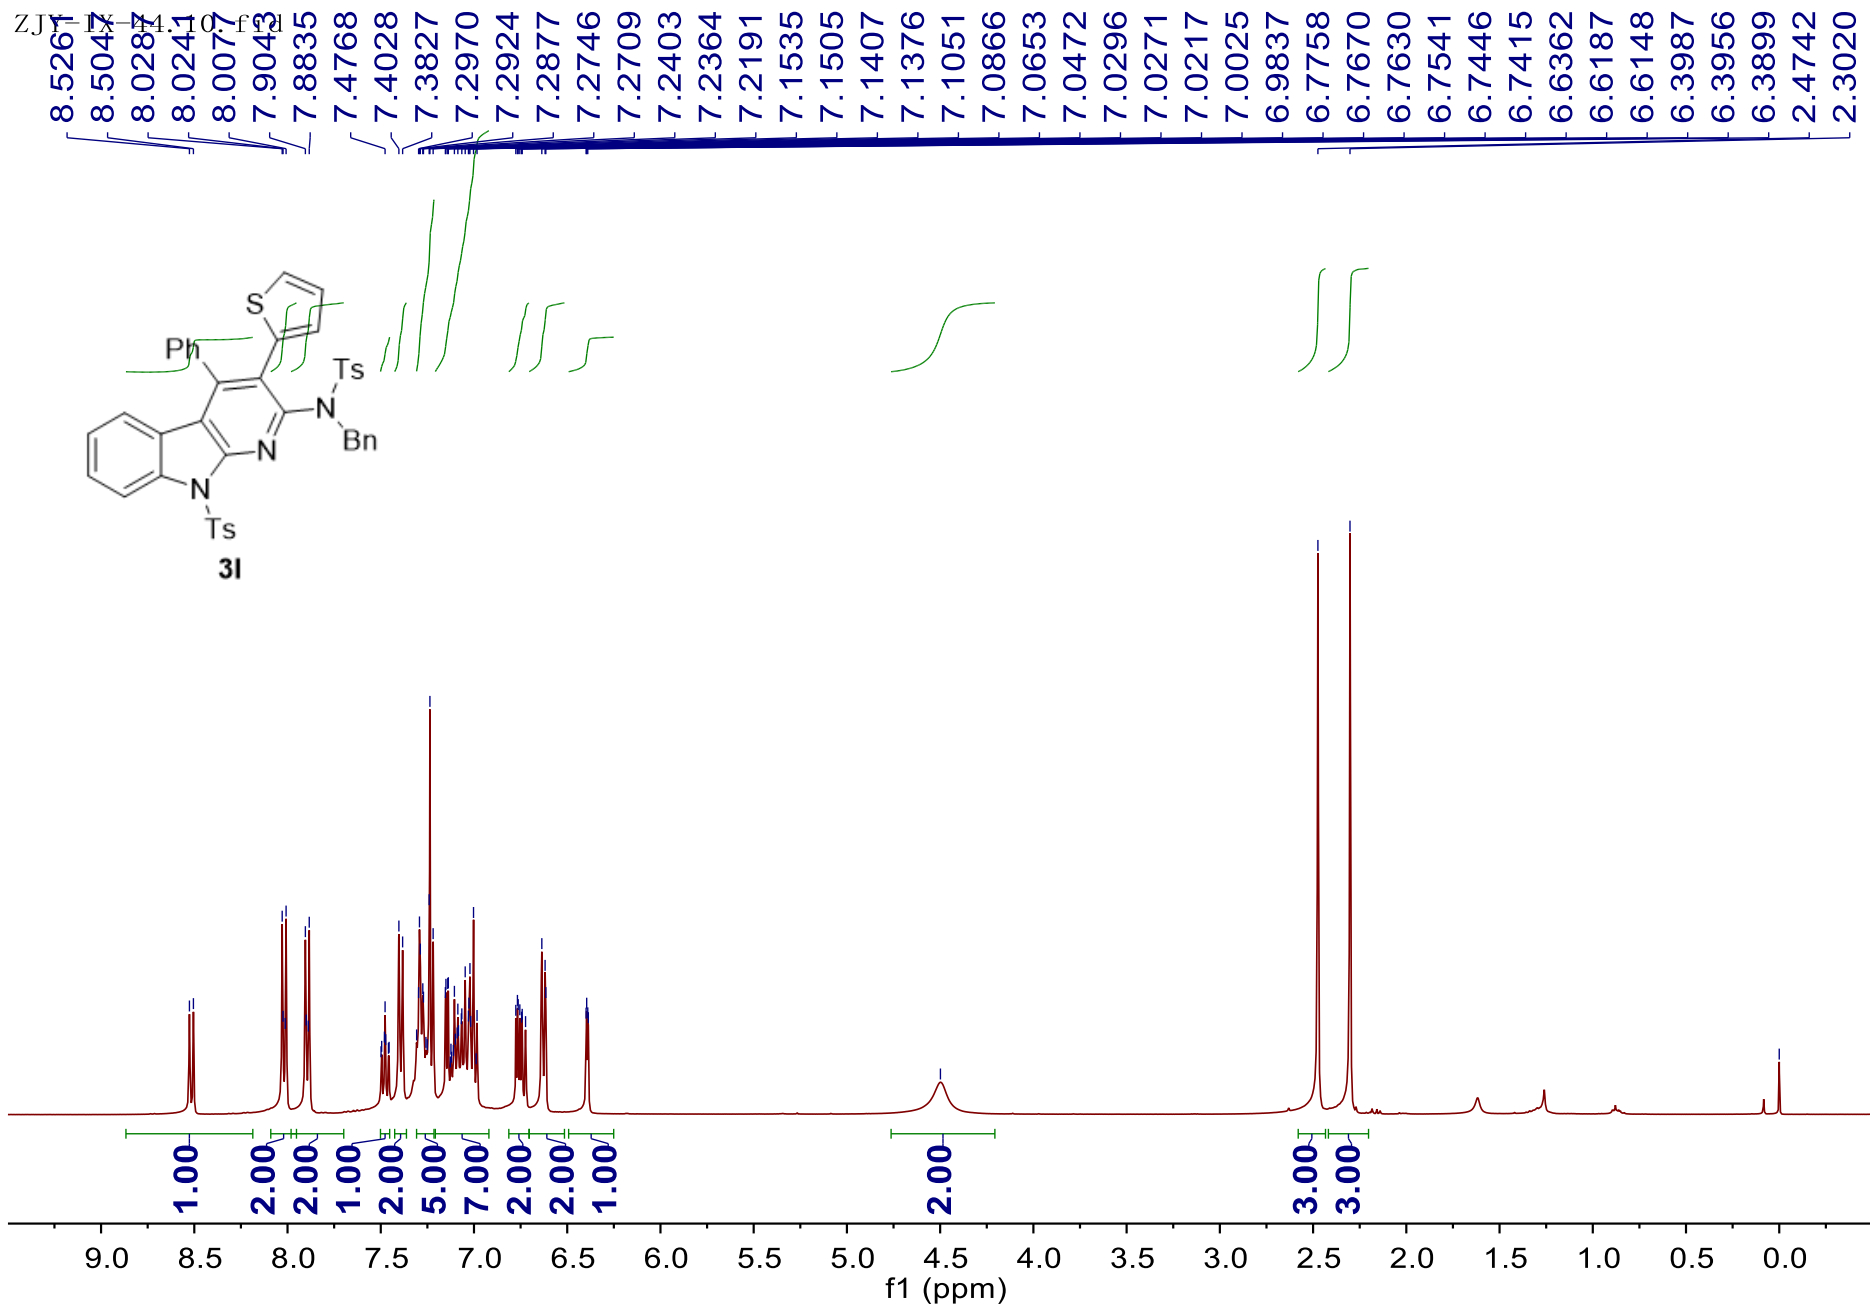



148.554  
 148.353  
 148.121  
 145.480  
 143.843  
 138.925  
 136.466  
 136.353  
 136.195  
 135.309  
 134.780  
 130.707  
 129.901  
 129.779  
 129.766  
 129.296  
 128.770  
 128.581  
 128.420  
 128.346  
 128.293  
 128.129  
 127.783  
 127.330  
 126.846  
 125.918  
 123.621  
 122.709  
 122.319  
 116.777  
 114.667  
 77.518  
 77.200  
 76.883  
 54.023  
 21.809  
 21.787

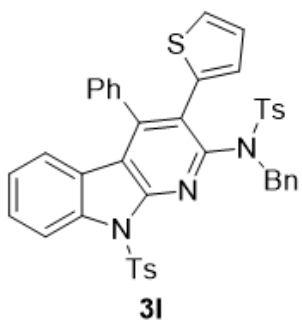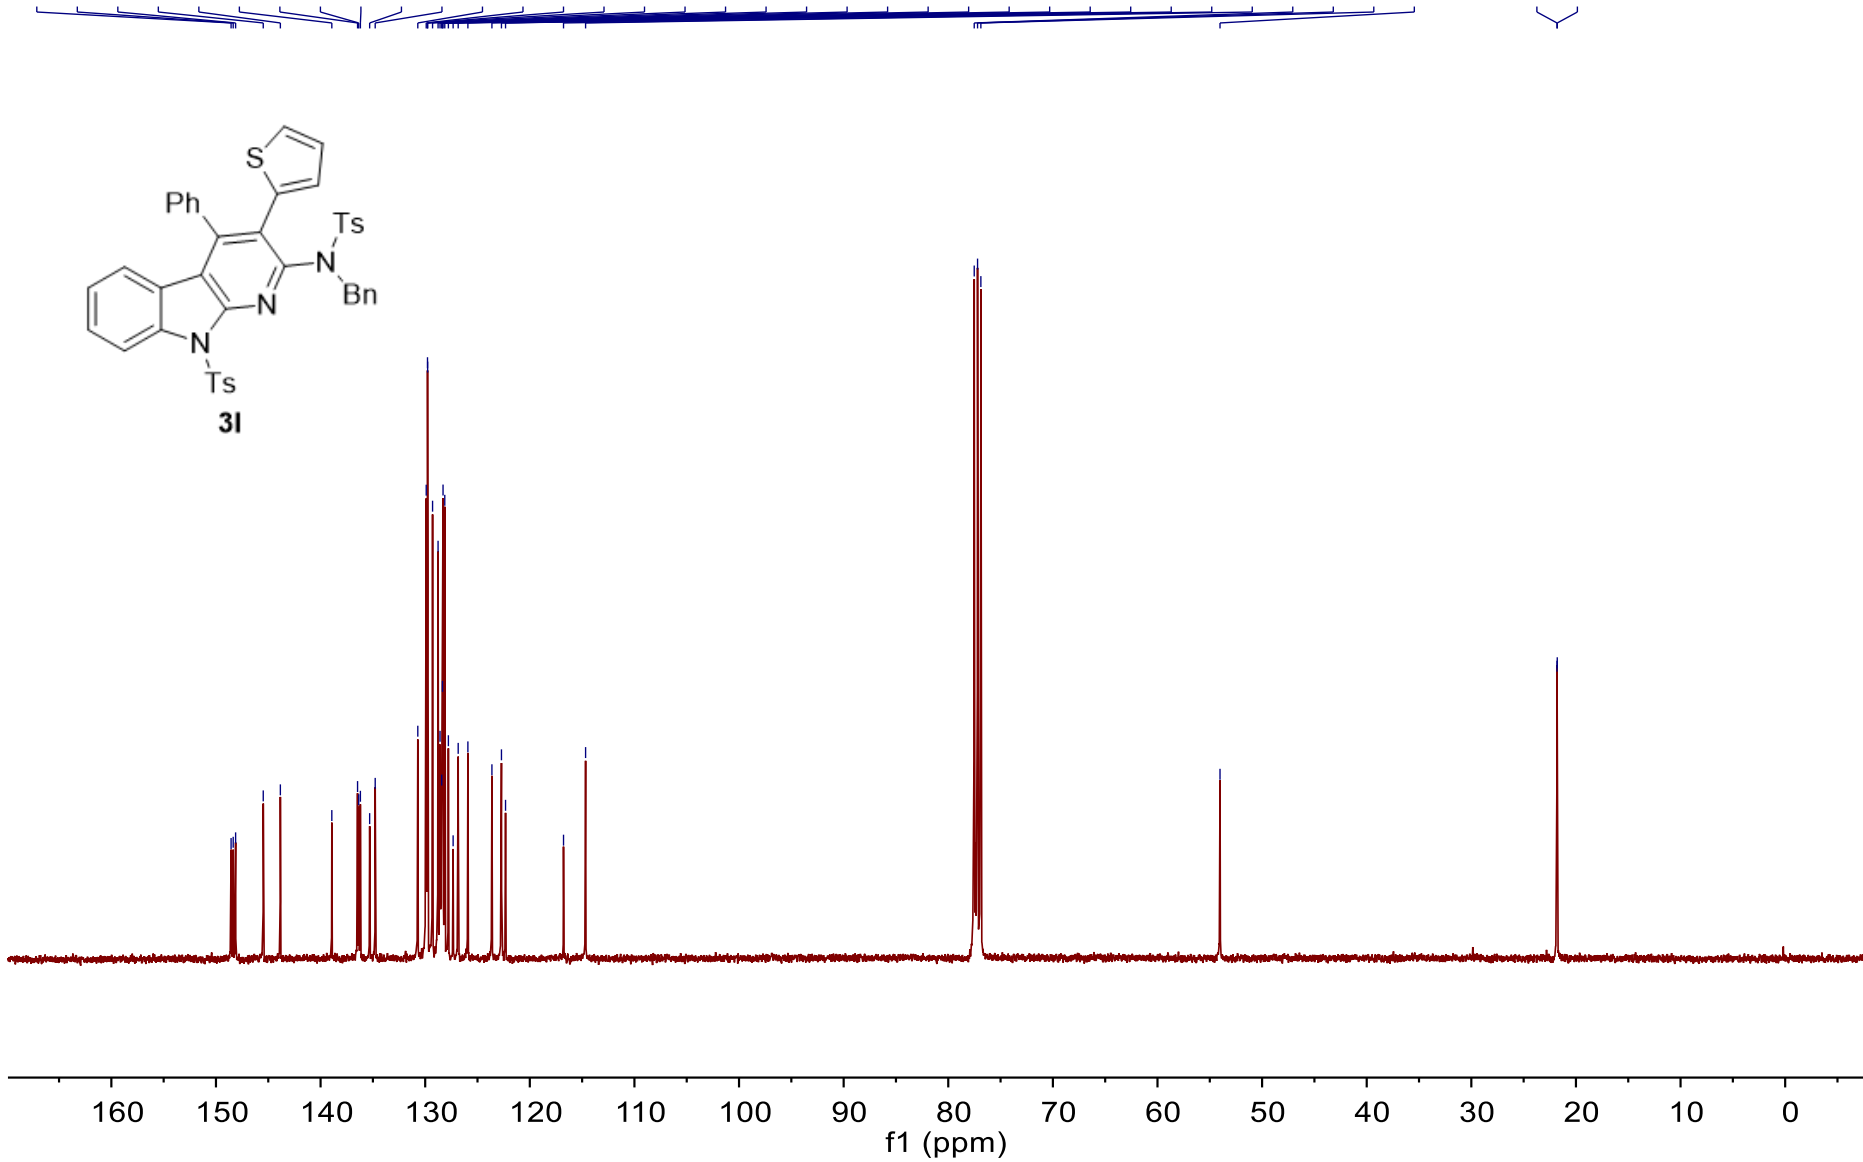

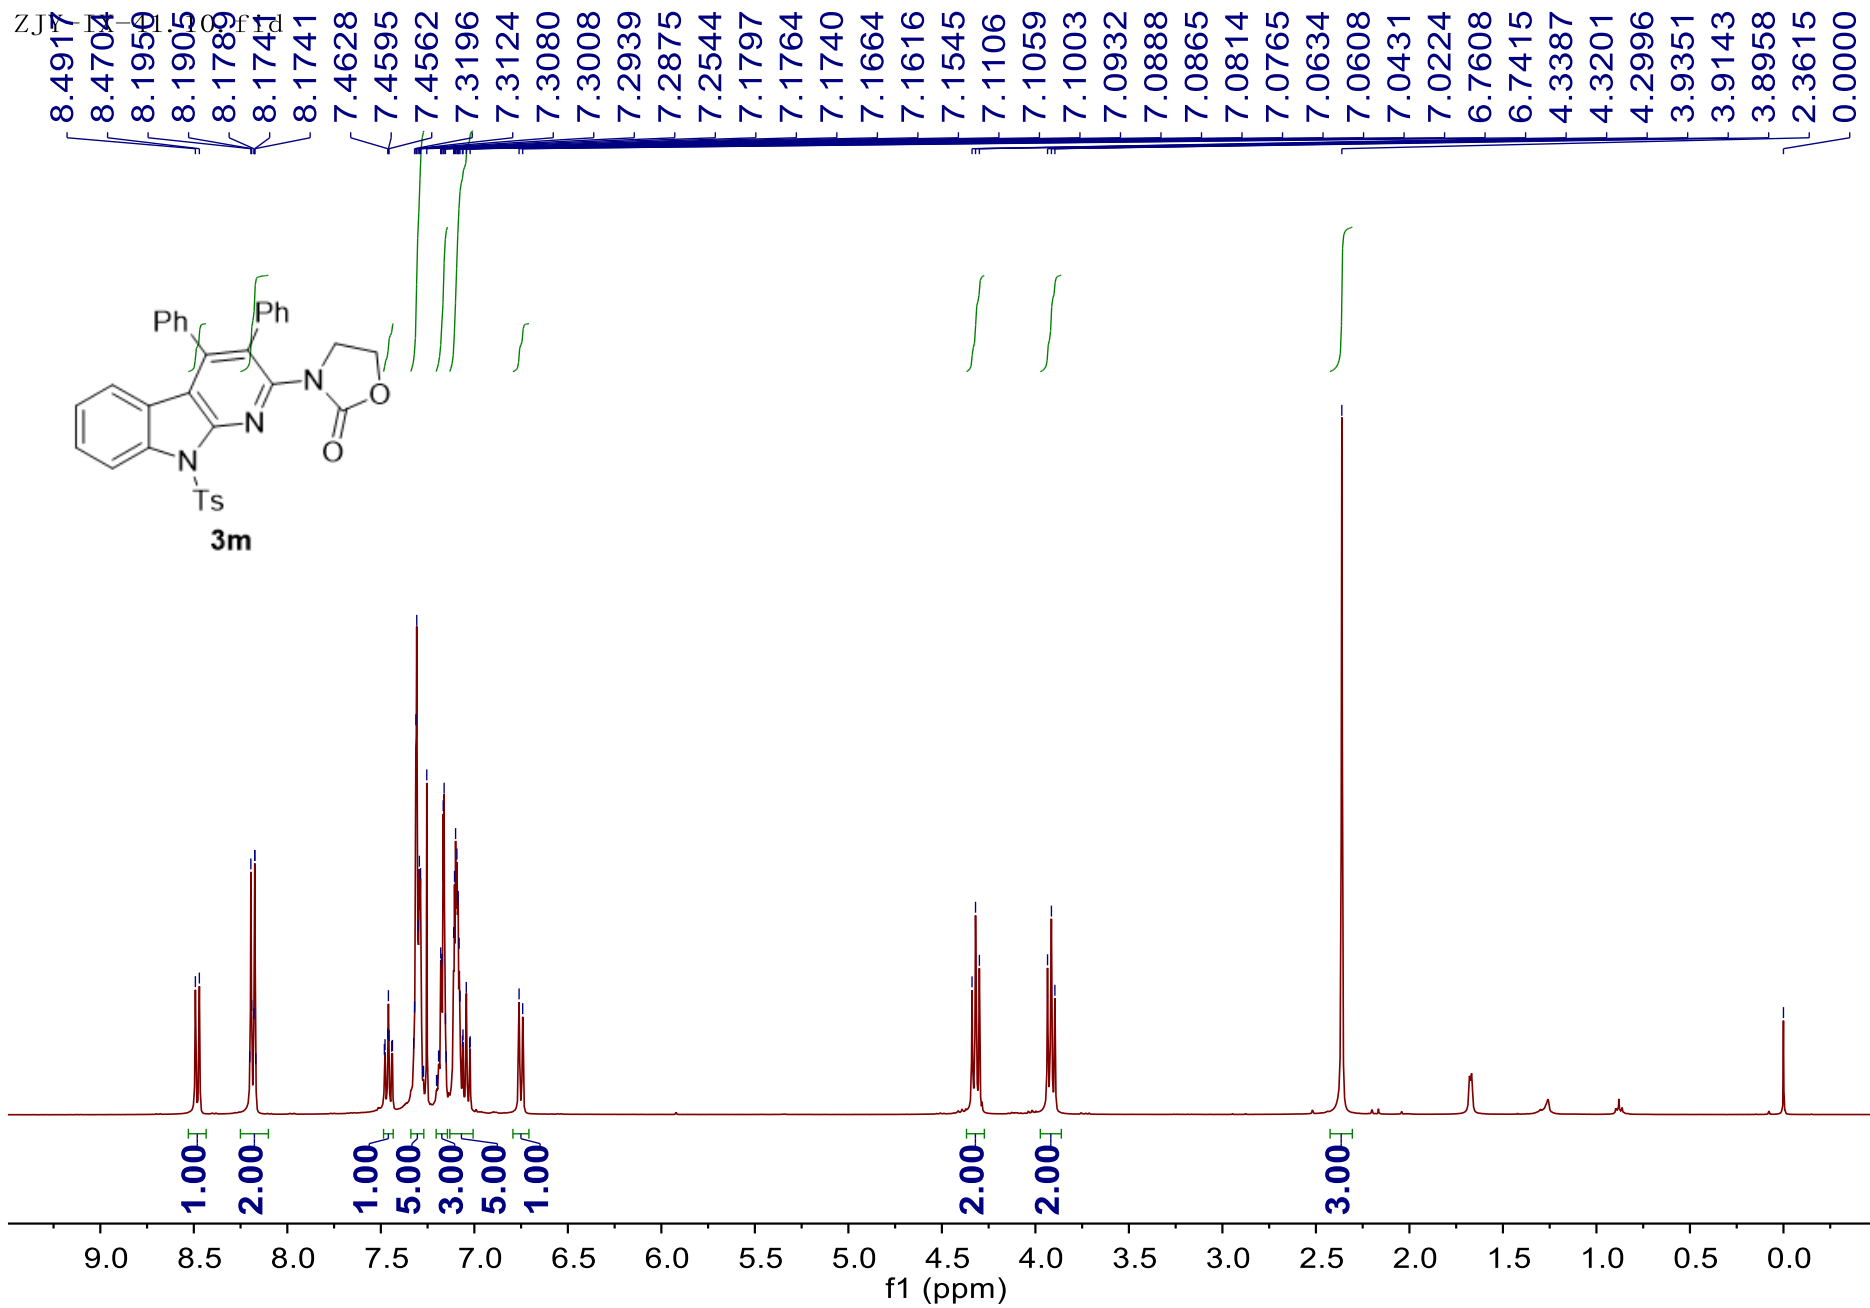

156.514  
 148.720  
 146.886  
 146.075  
 145.587  
 138.478  
 136.158  
 135.679  
 135.277  
 130.476  
 130.001  
 129.937  
 129.028  
 128.598  
 128.331  
 128.316  
 128.183  
 127.898  
 127.362  
 123.571  
 122.573  
 122.547  
 116.740  
 114.540  
 77.518  
 77.200  
 76.883  
 62.826  
 46.751  
 21.853

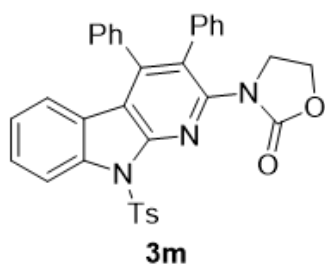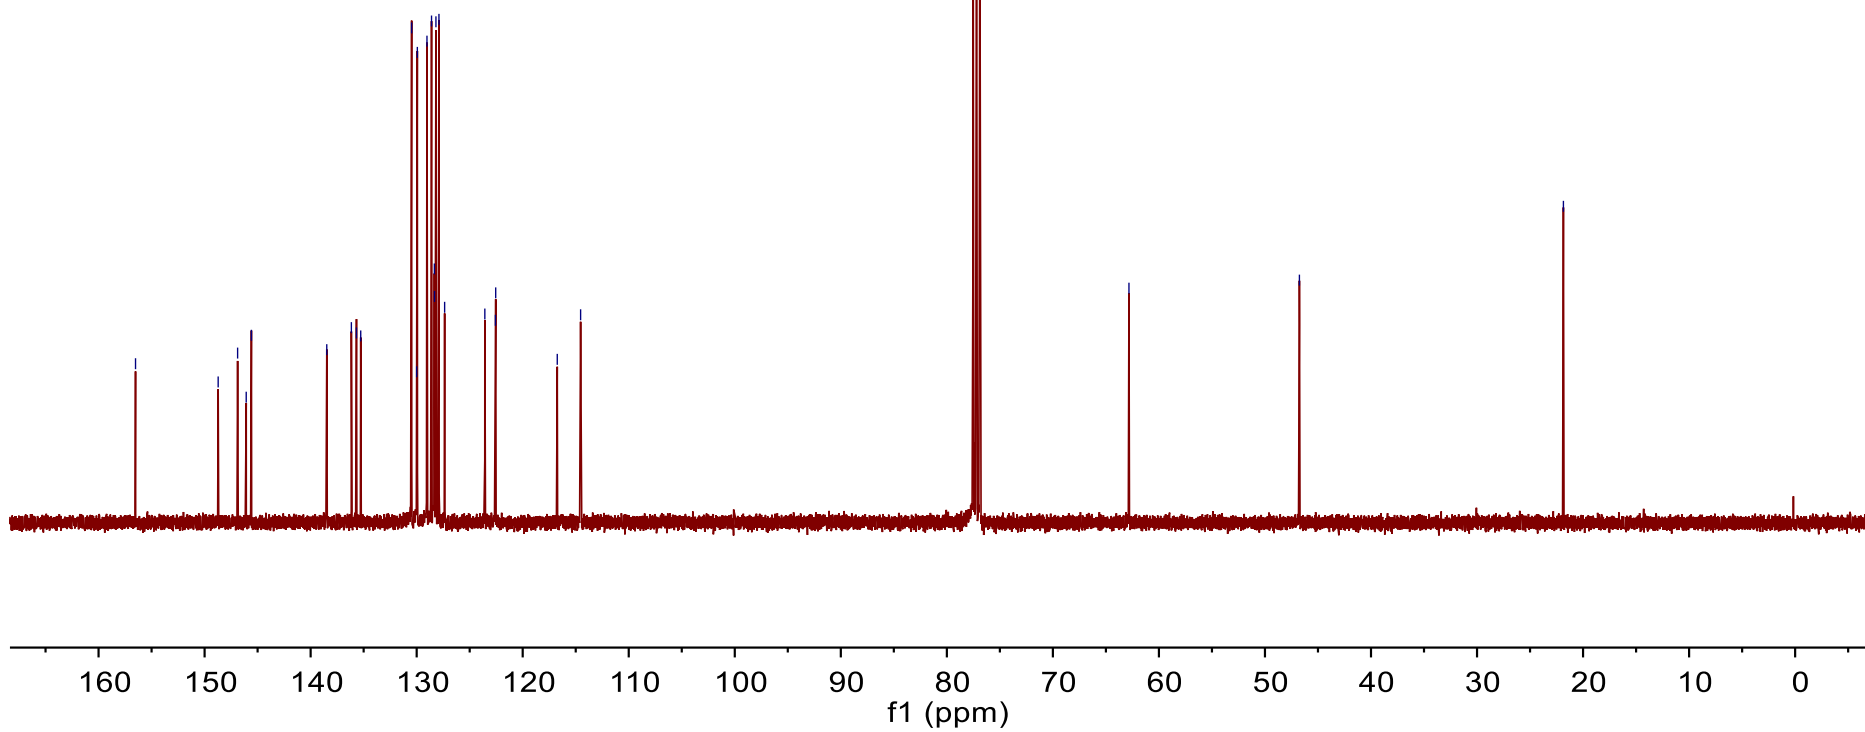

ZJ-18-03-10-fd

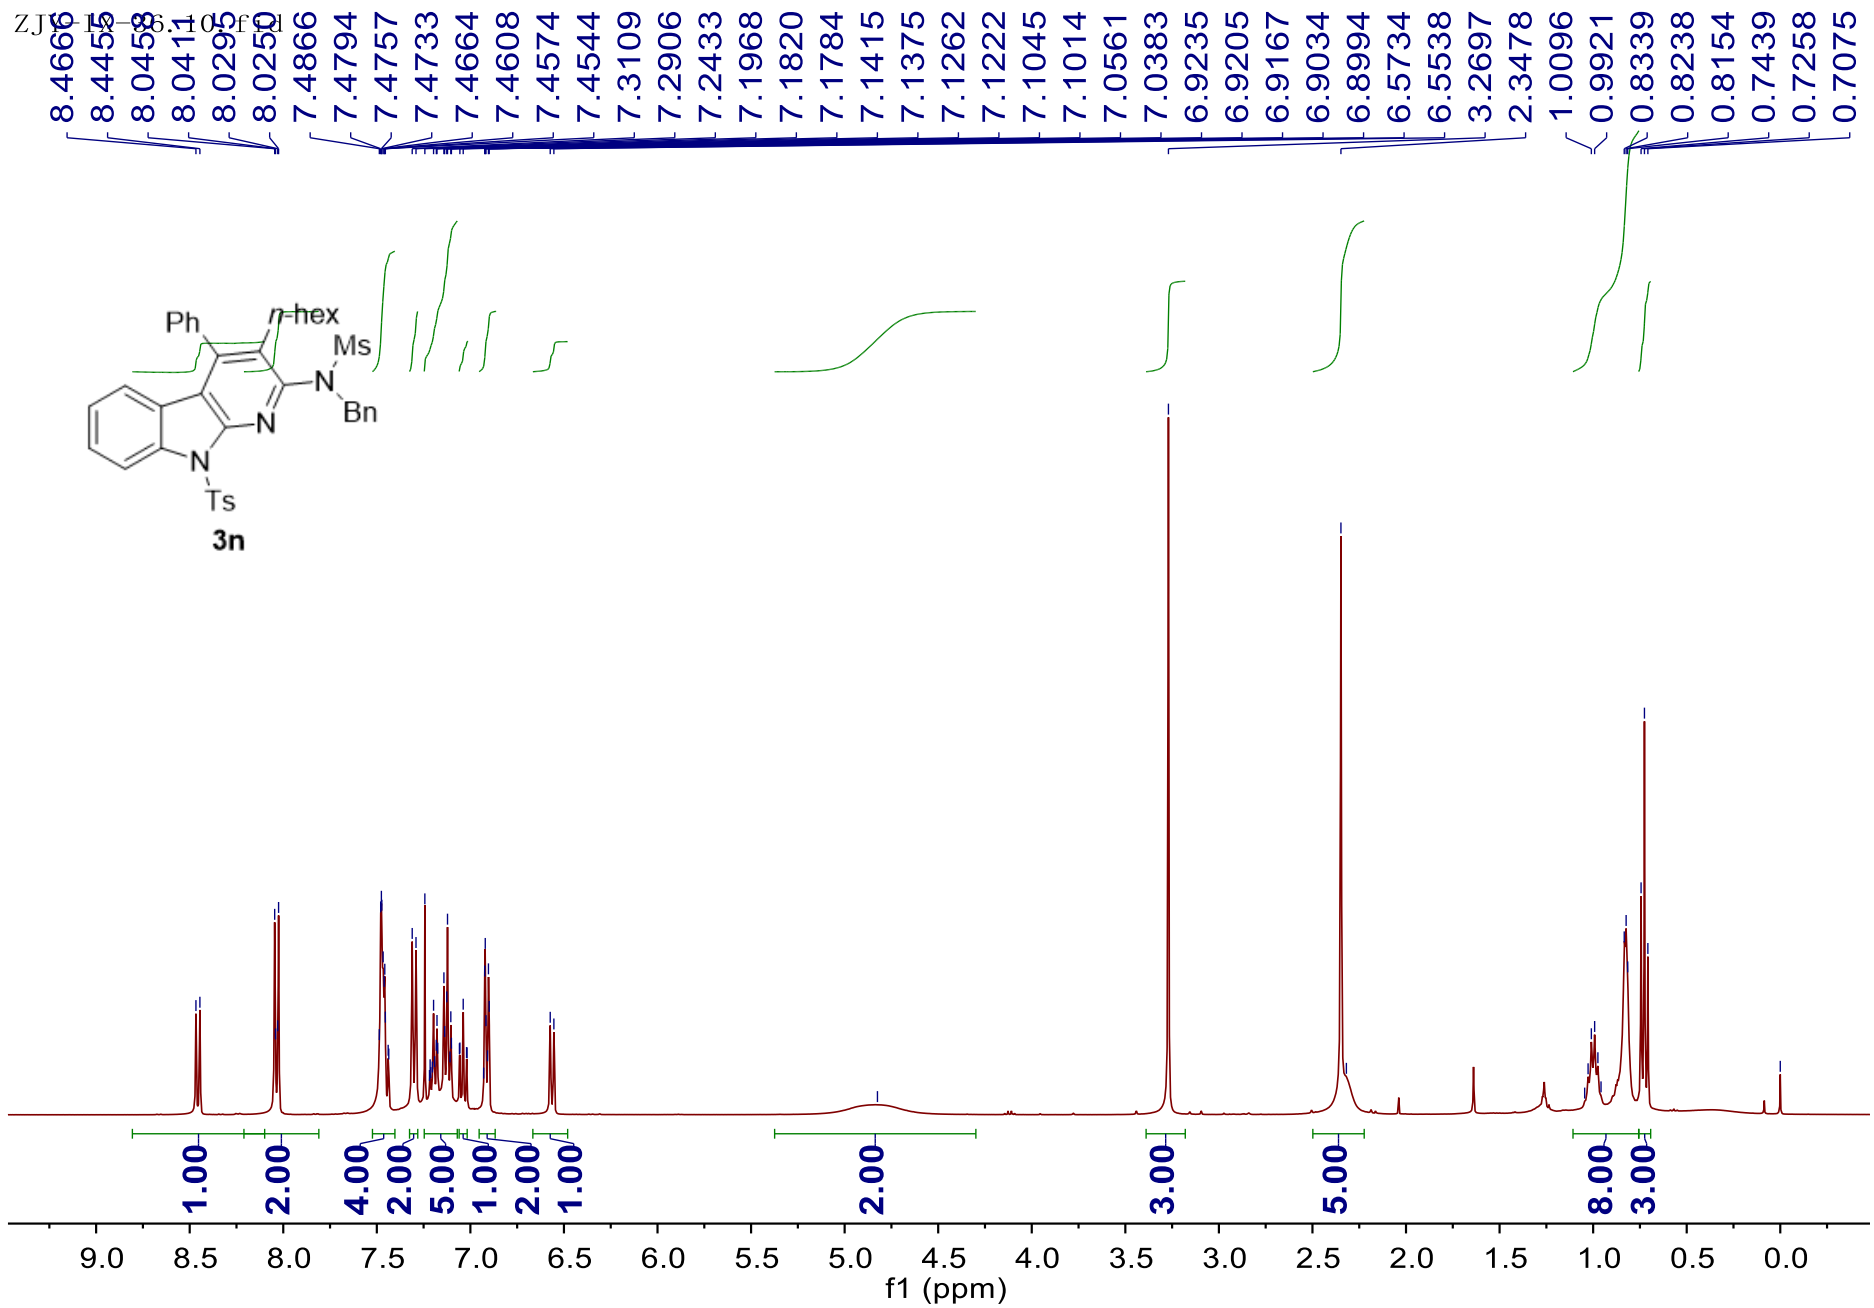

148.529  
 147.486  
 147.340  
 145.474  
 138.816  
 136.839  
 136.501  
 135.186  
 133.906  
 129.960  
 129.939  
 129.019  
 128.626  
 128.419  
 128.290  
 128.221  
 127.535  
 123.686  
 122.634  
 122.601  
 117.564  
 114.533  
 77.519  
 77.200  
 76.883  
 55.392  
 37.067  
 30.964  
 29.571  
 29.369  
 27.898  
 22.381  
 21.753  
 14.121

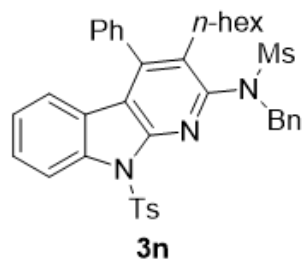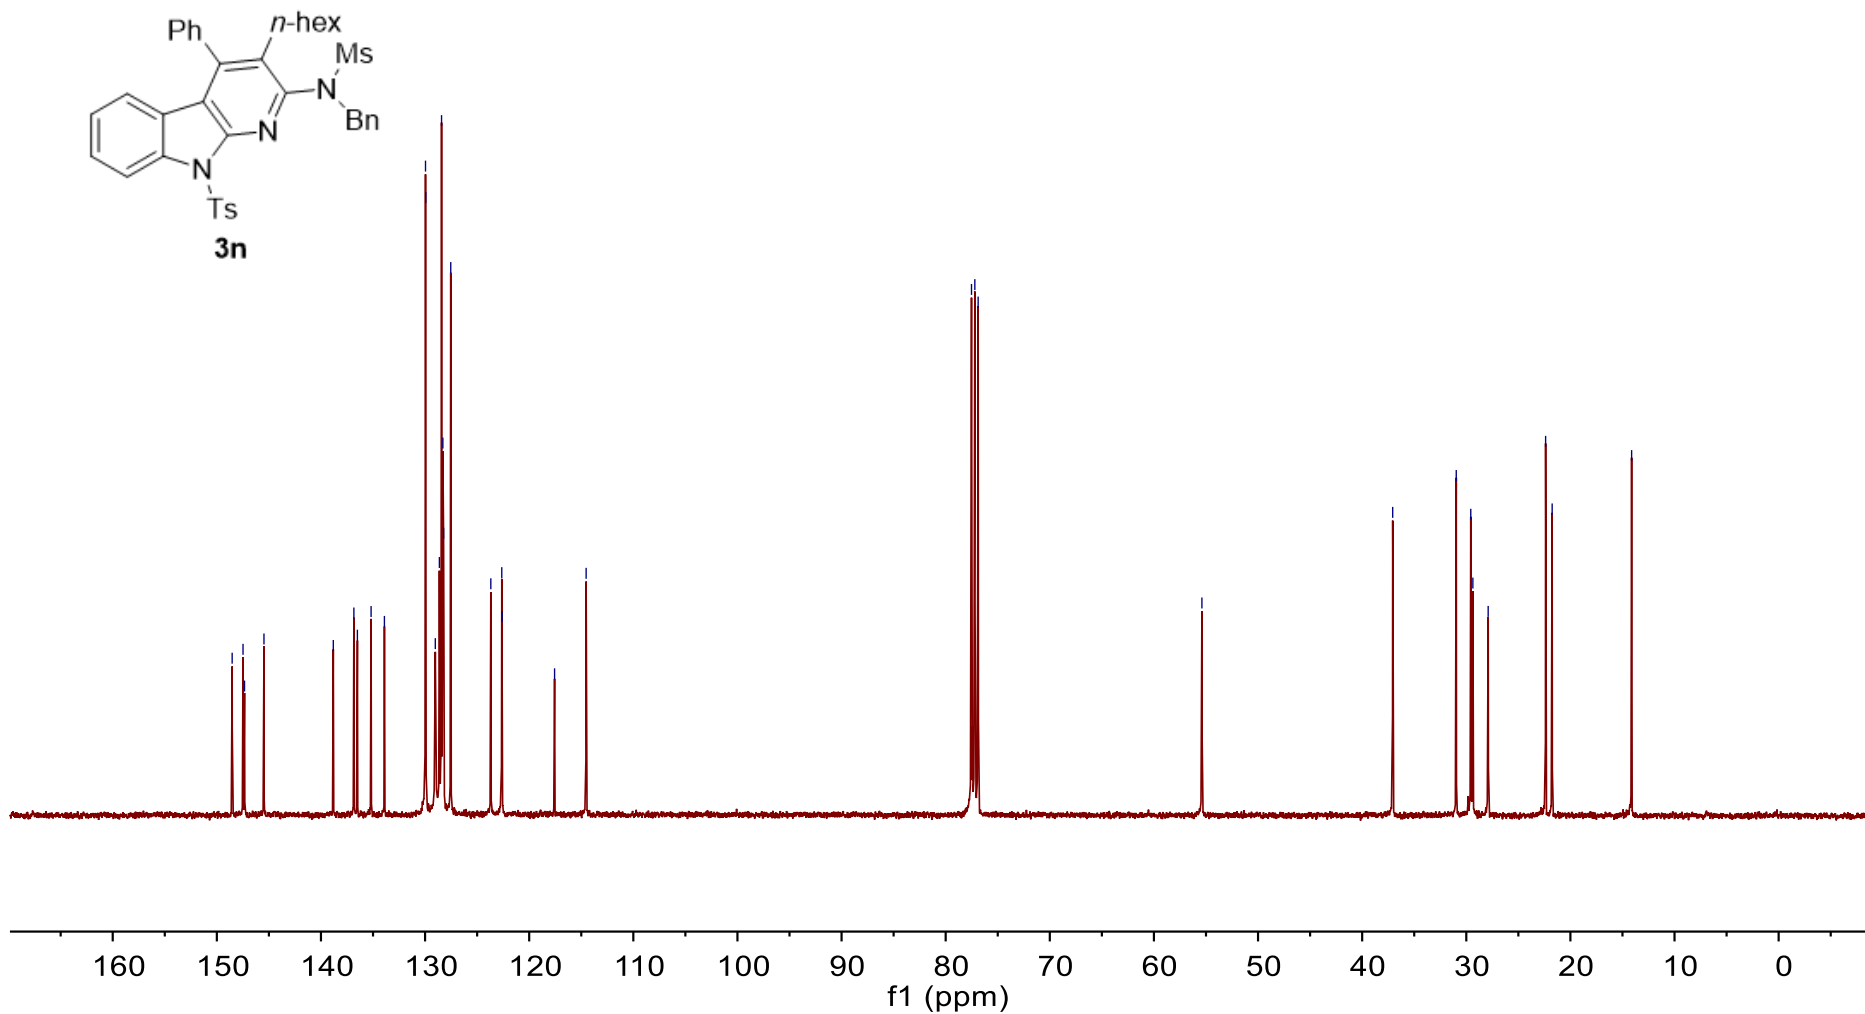

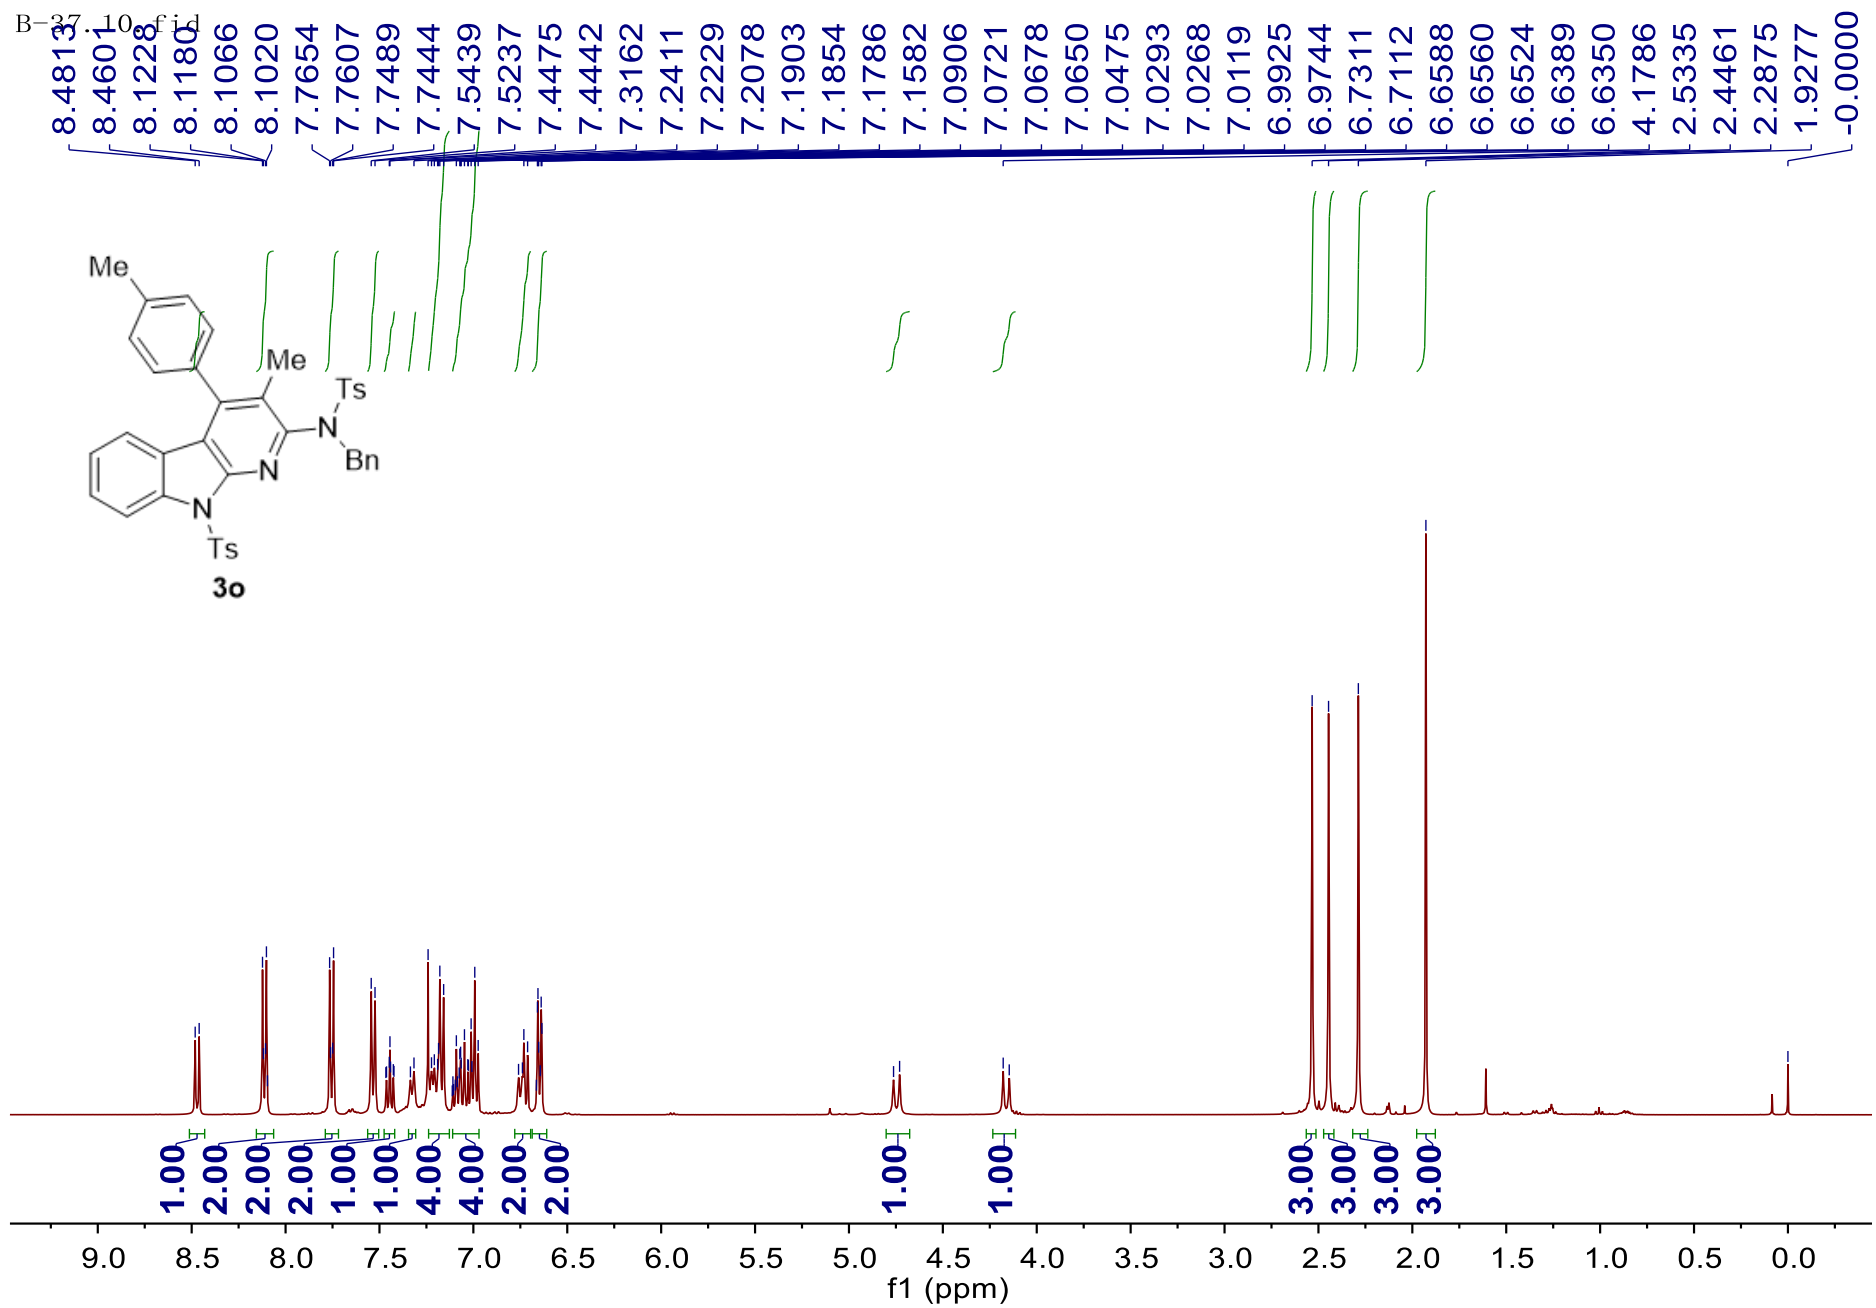

B-34.

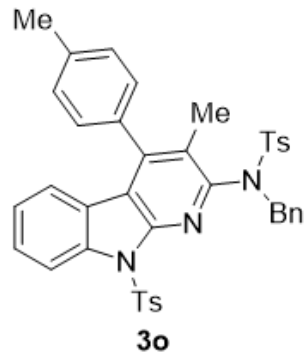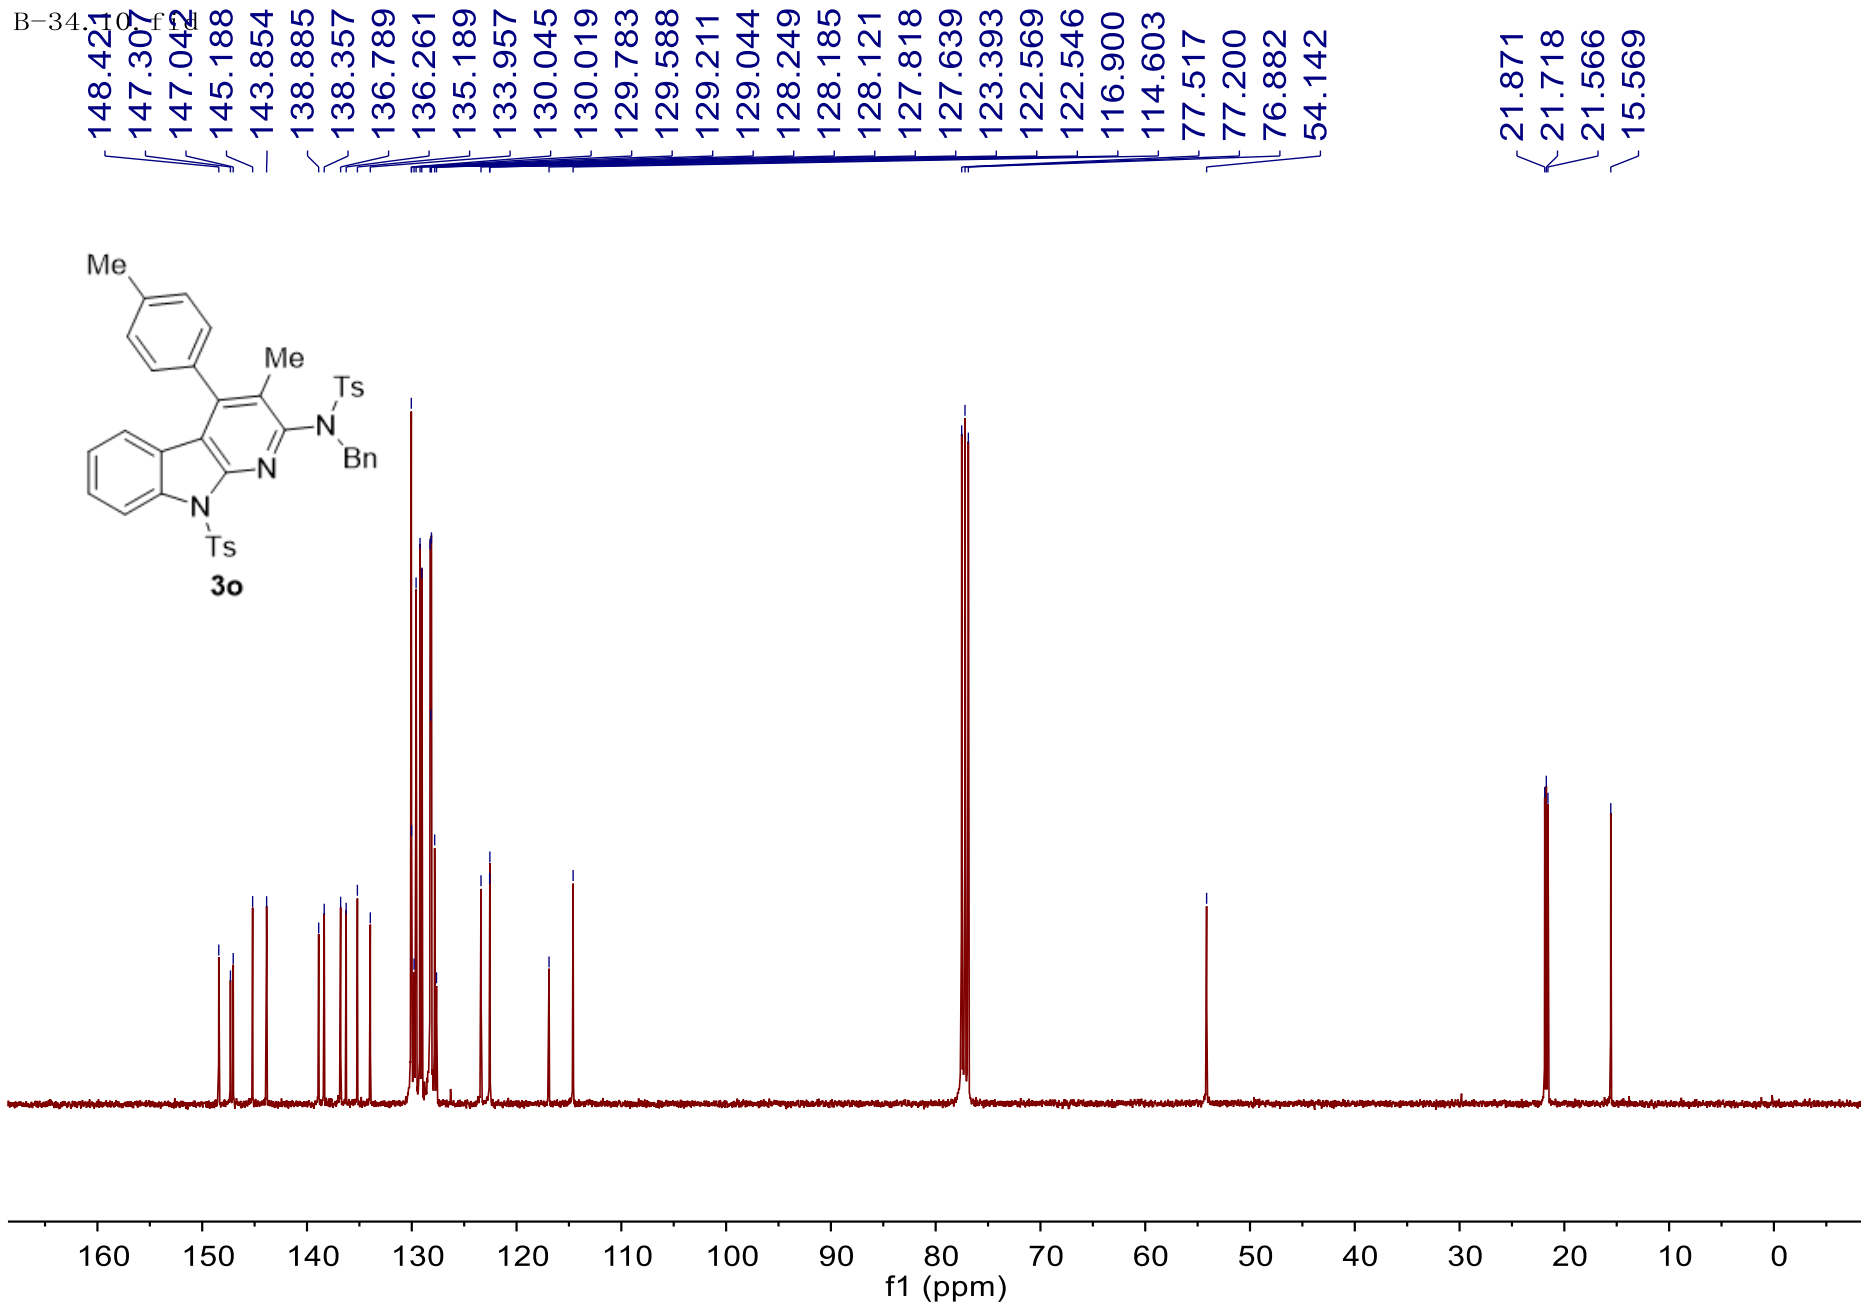

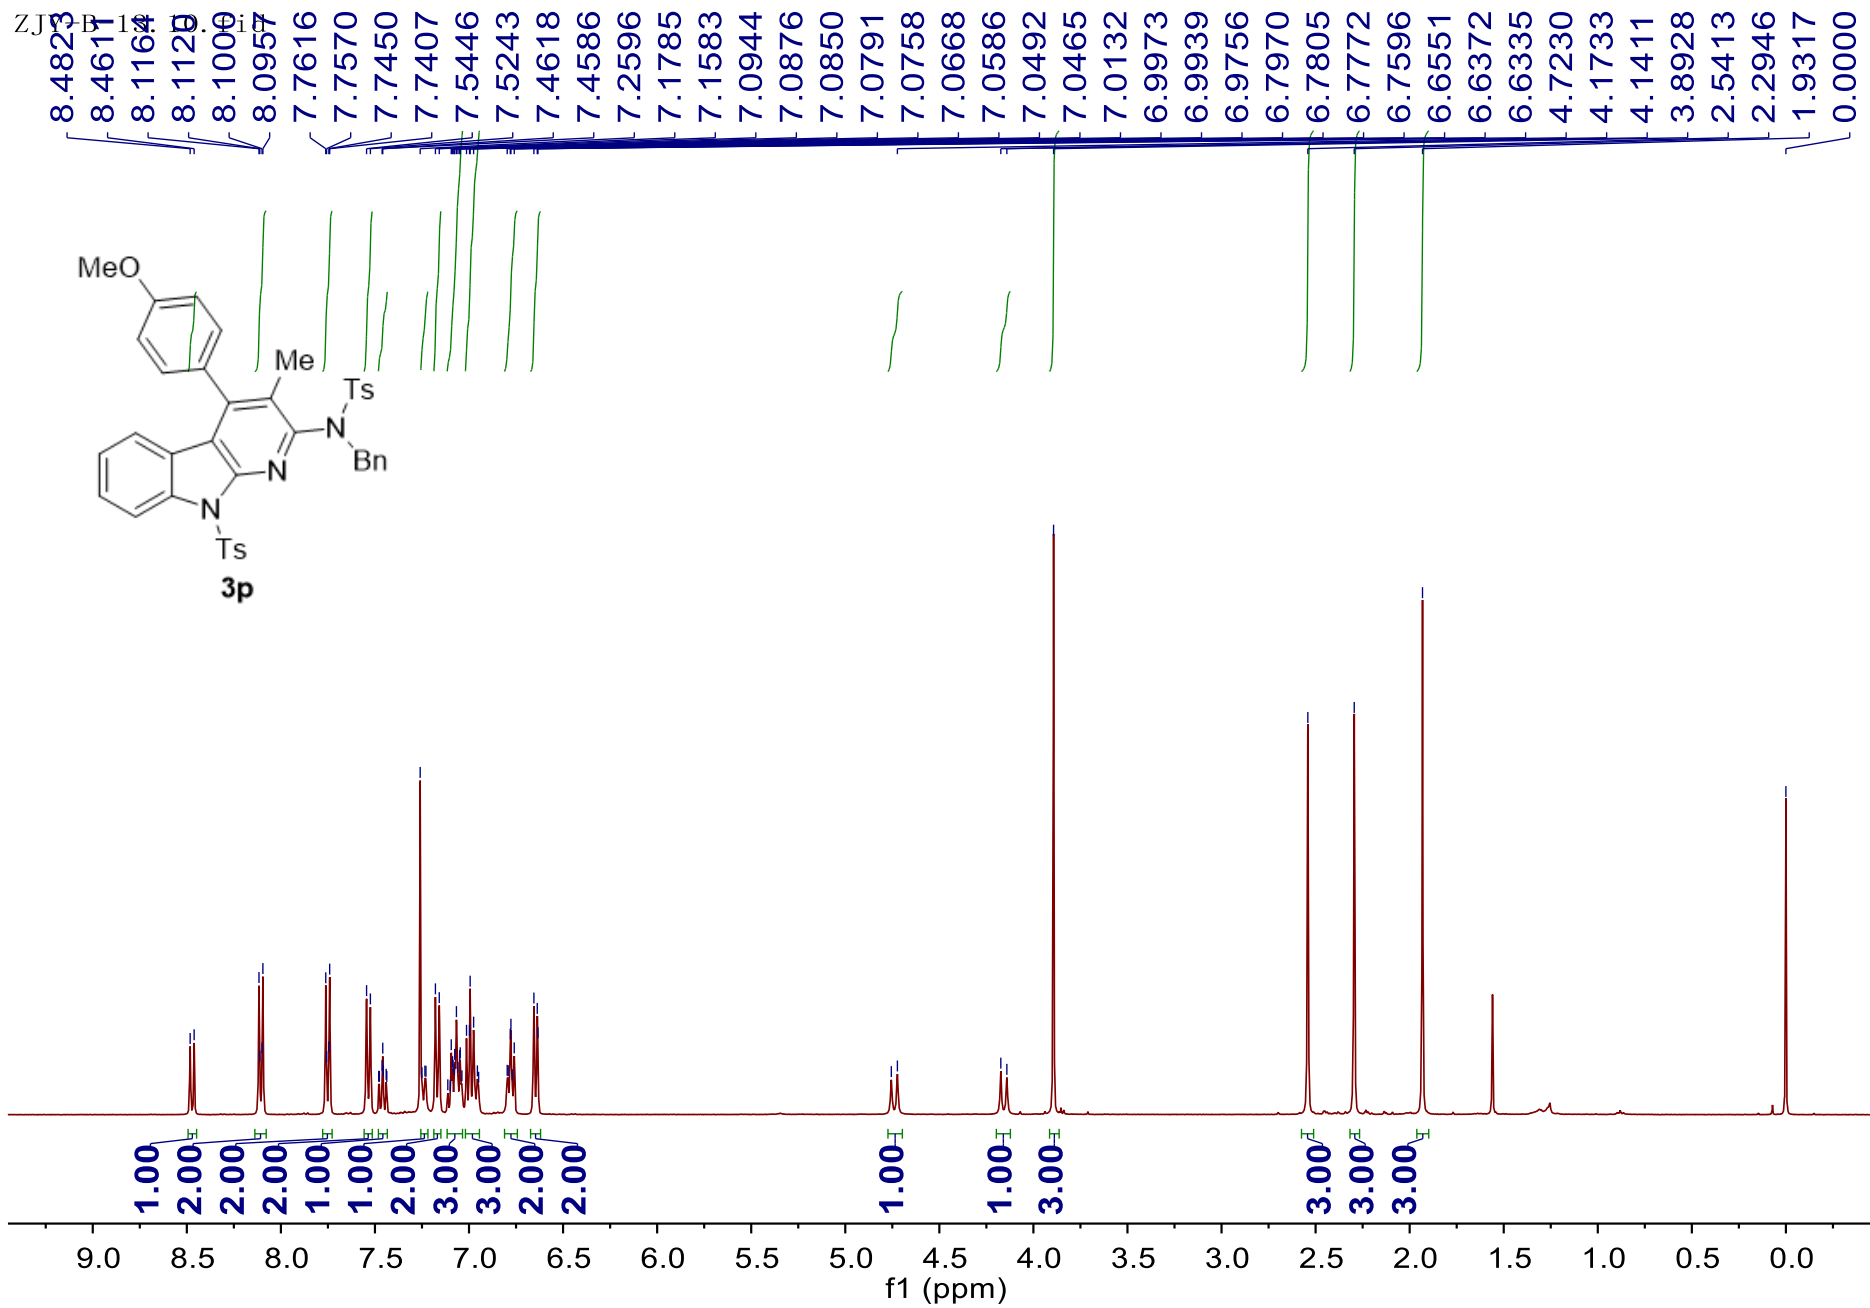



ZJY-151001

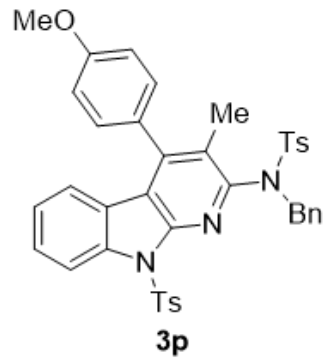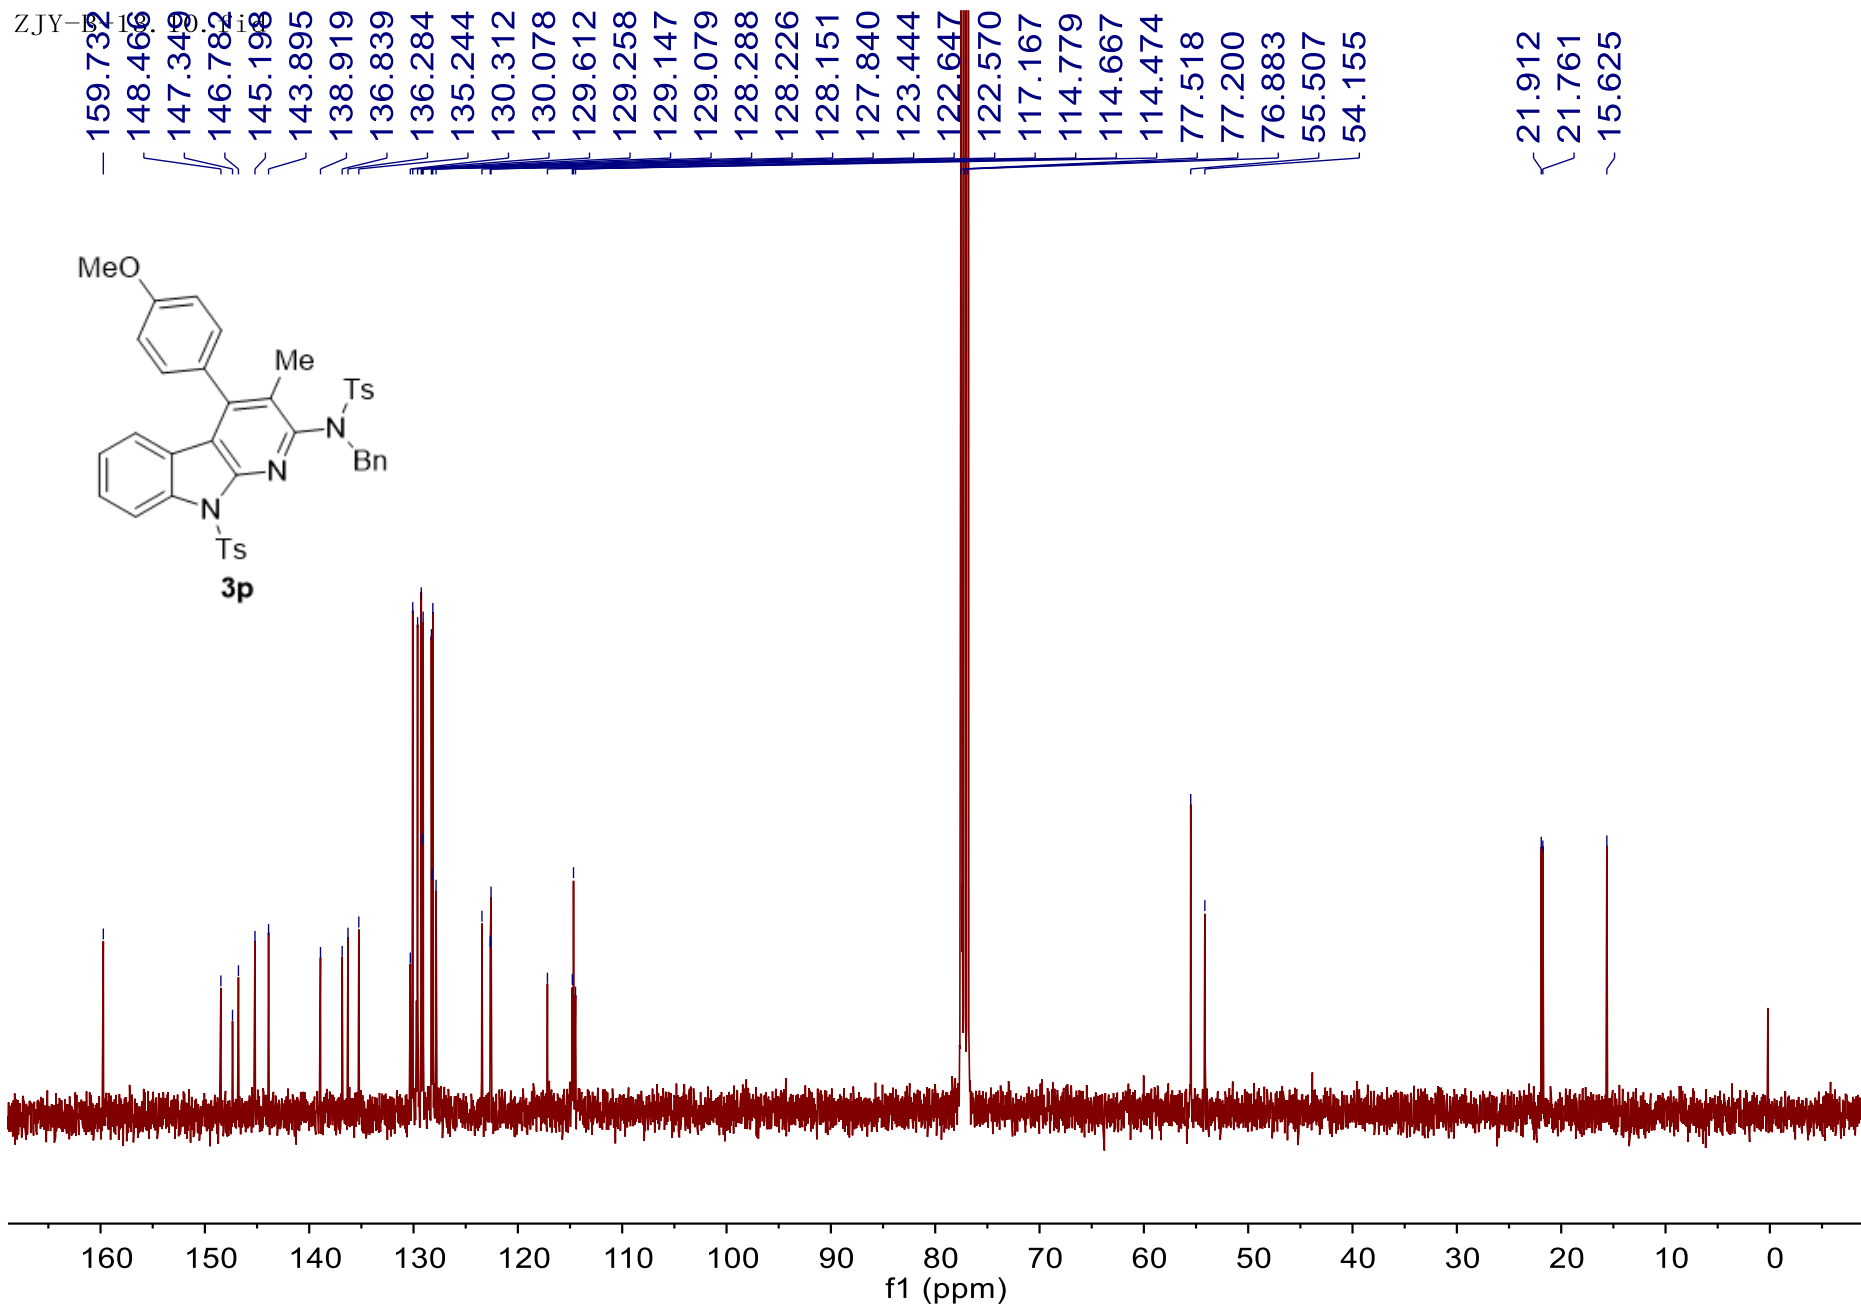

S100



B-32.

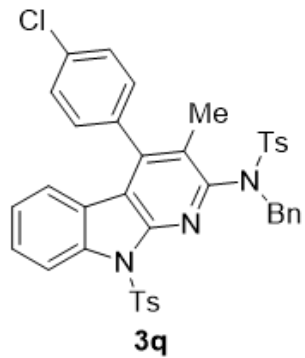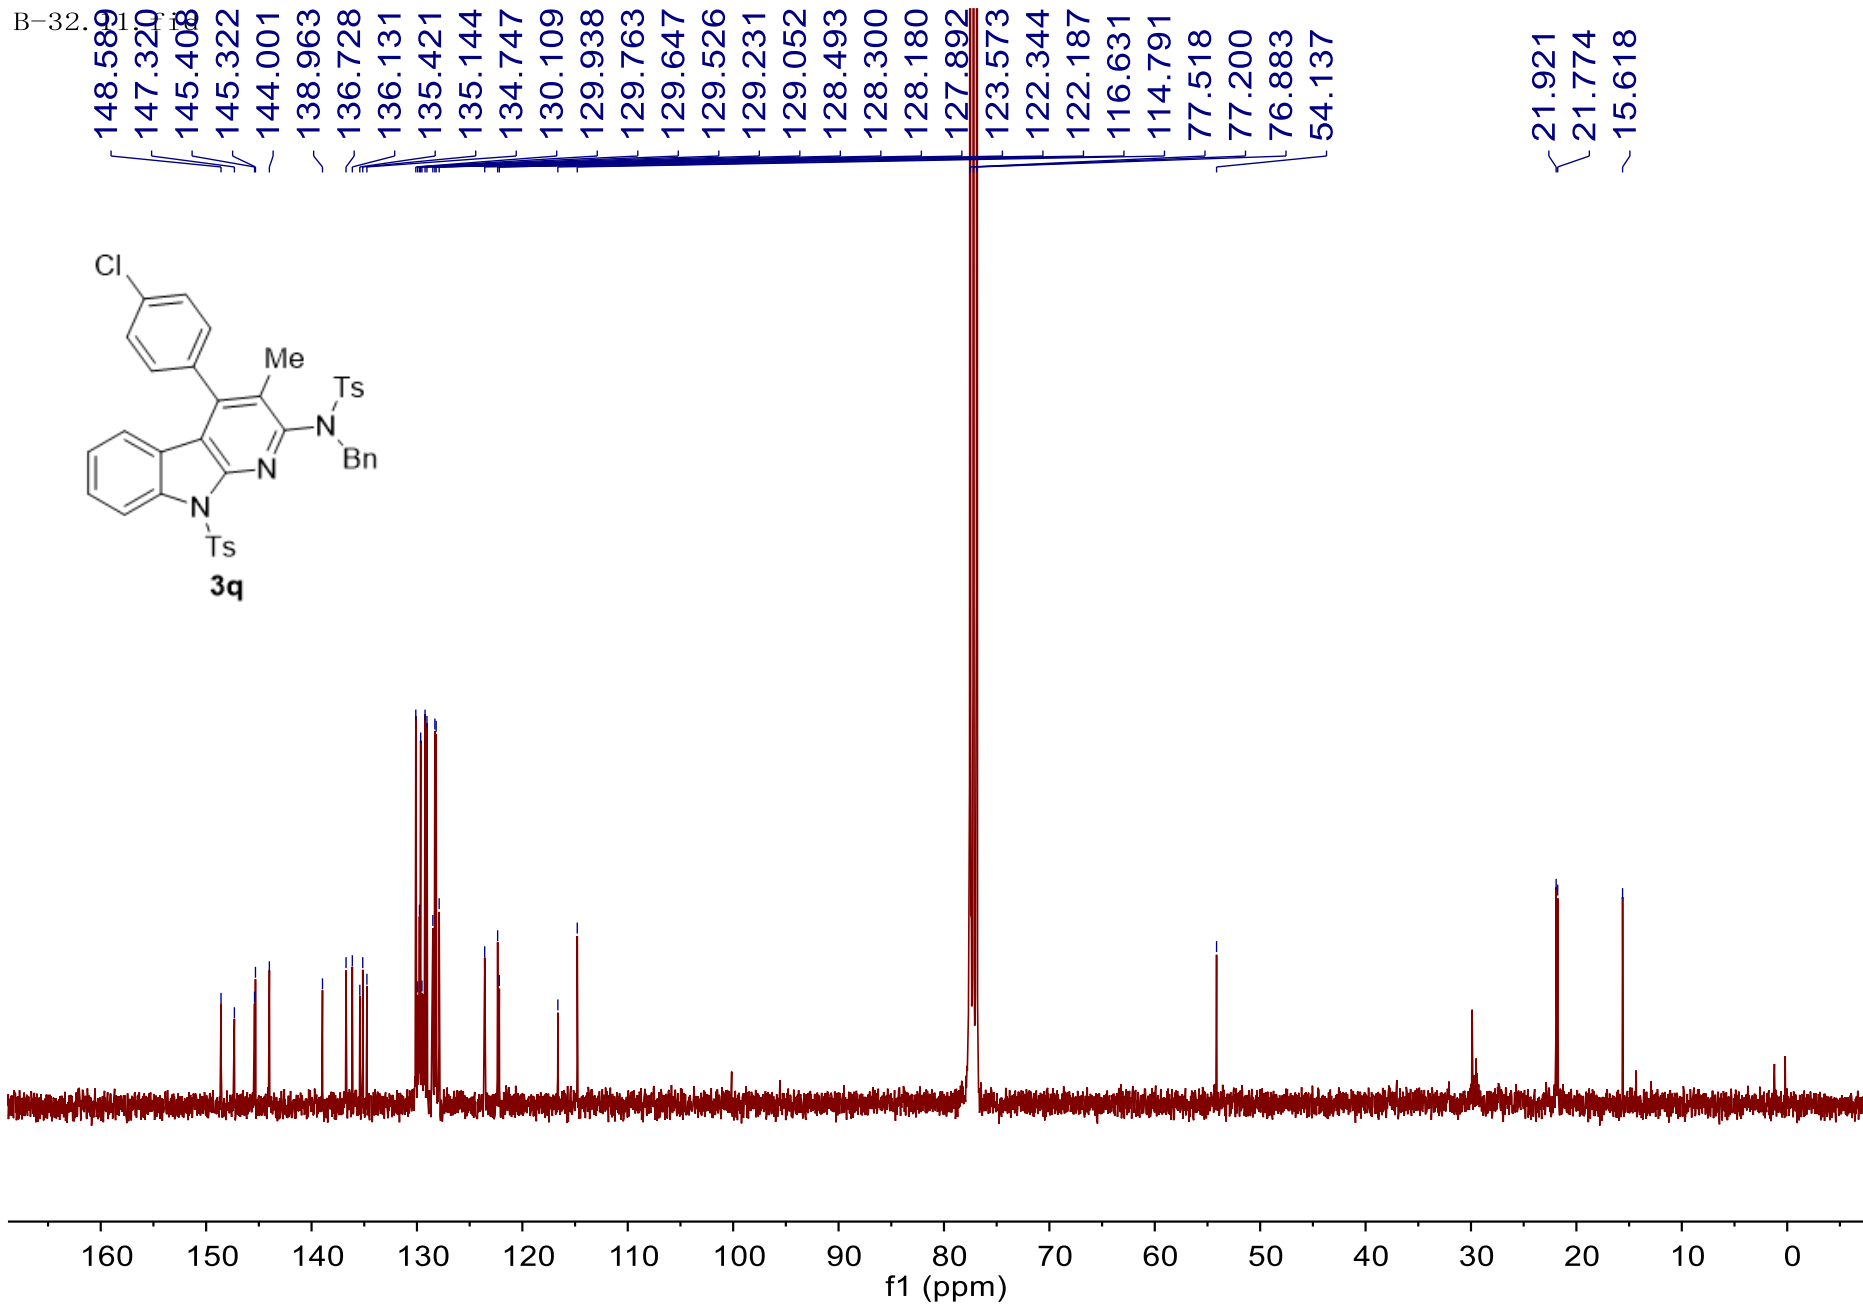

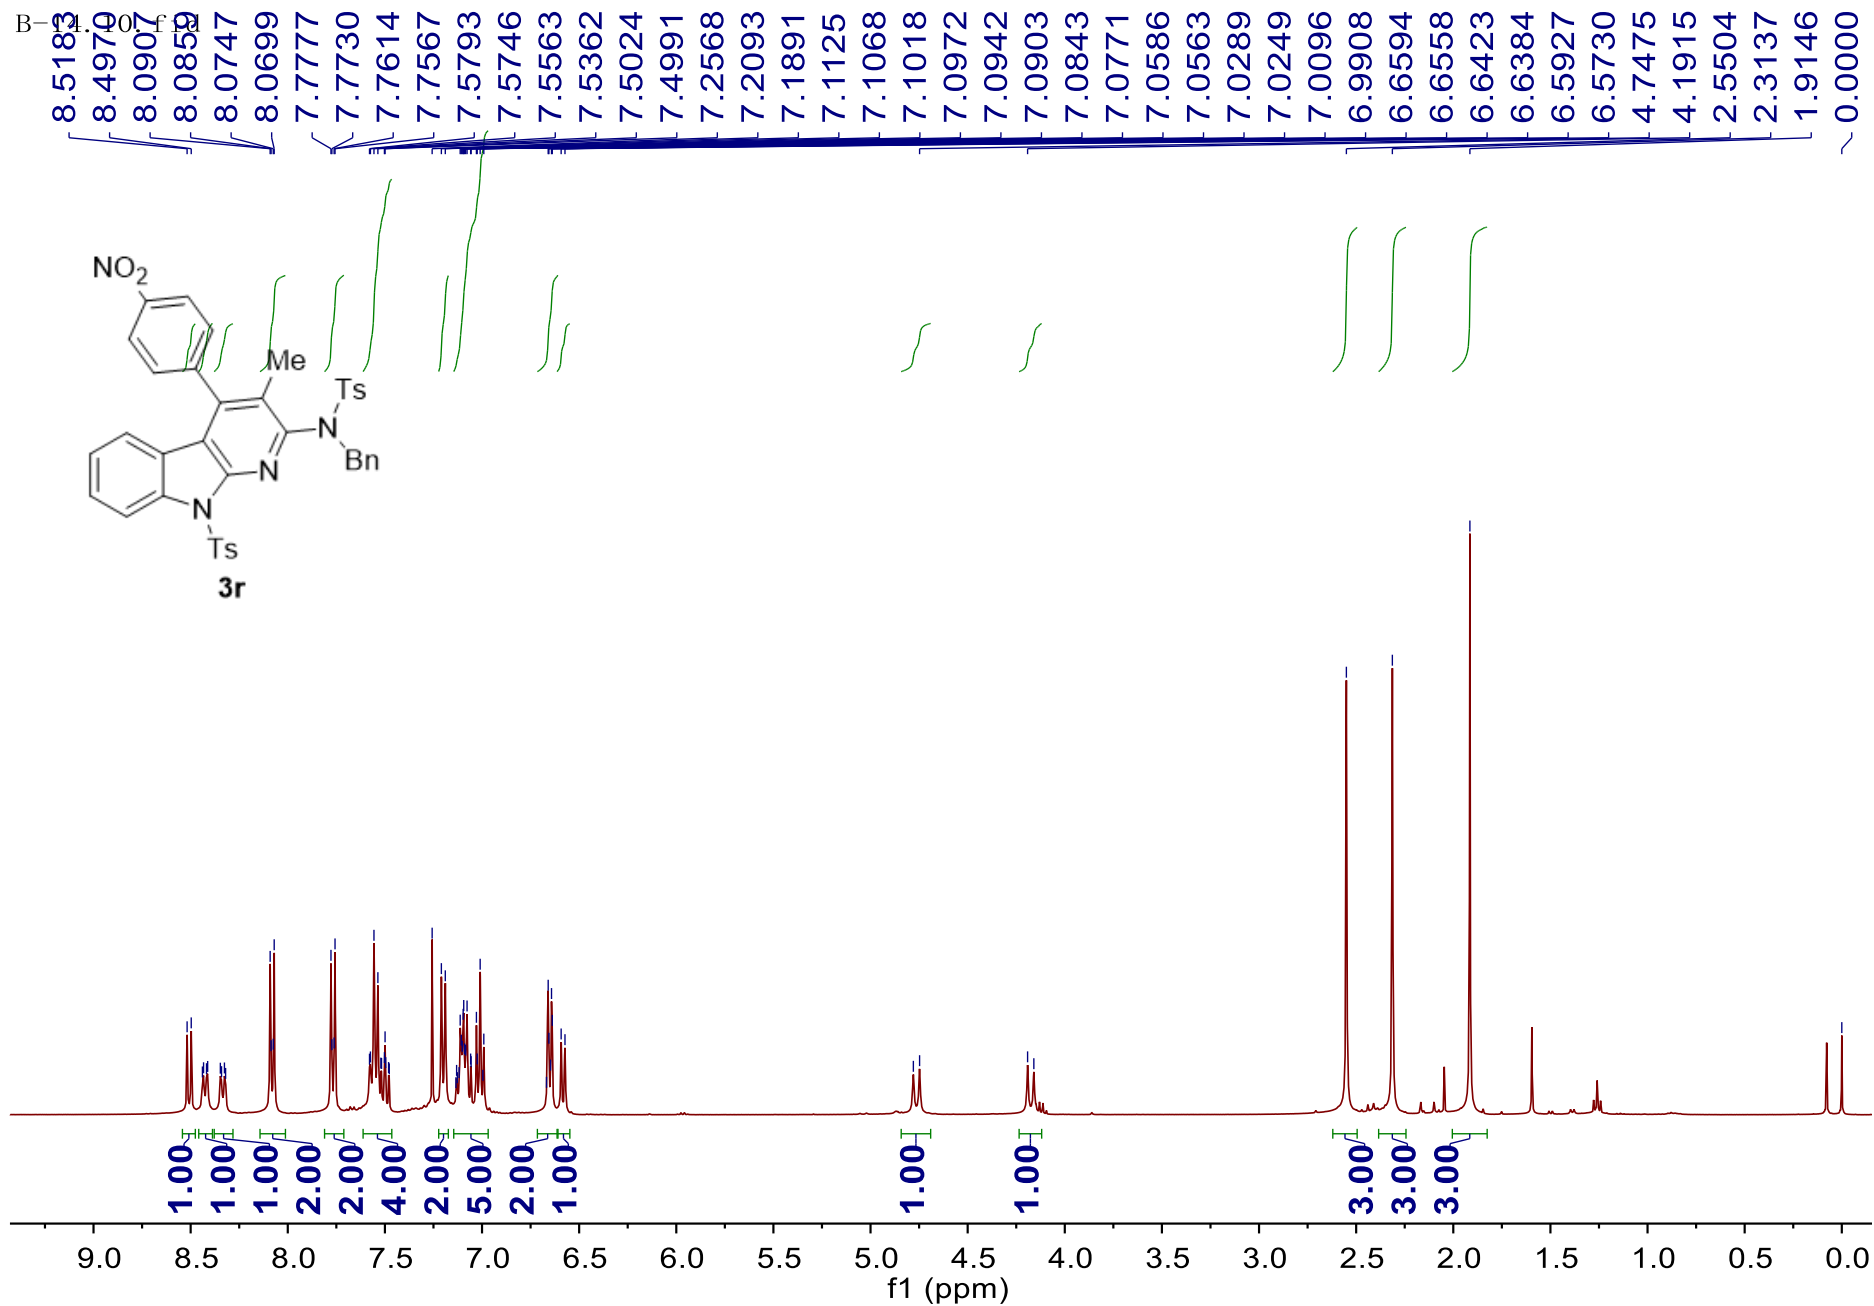

B-14.

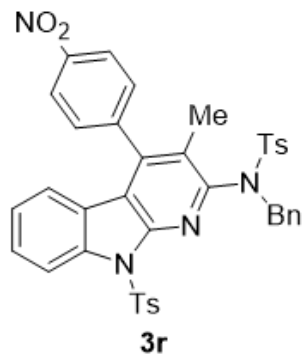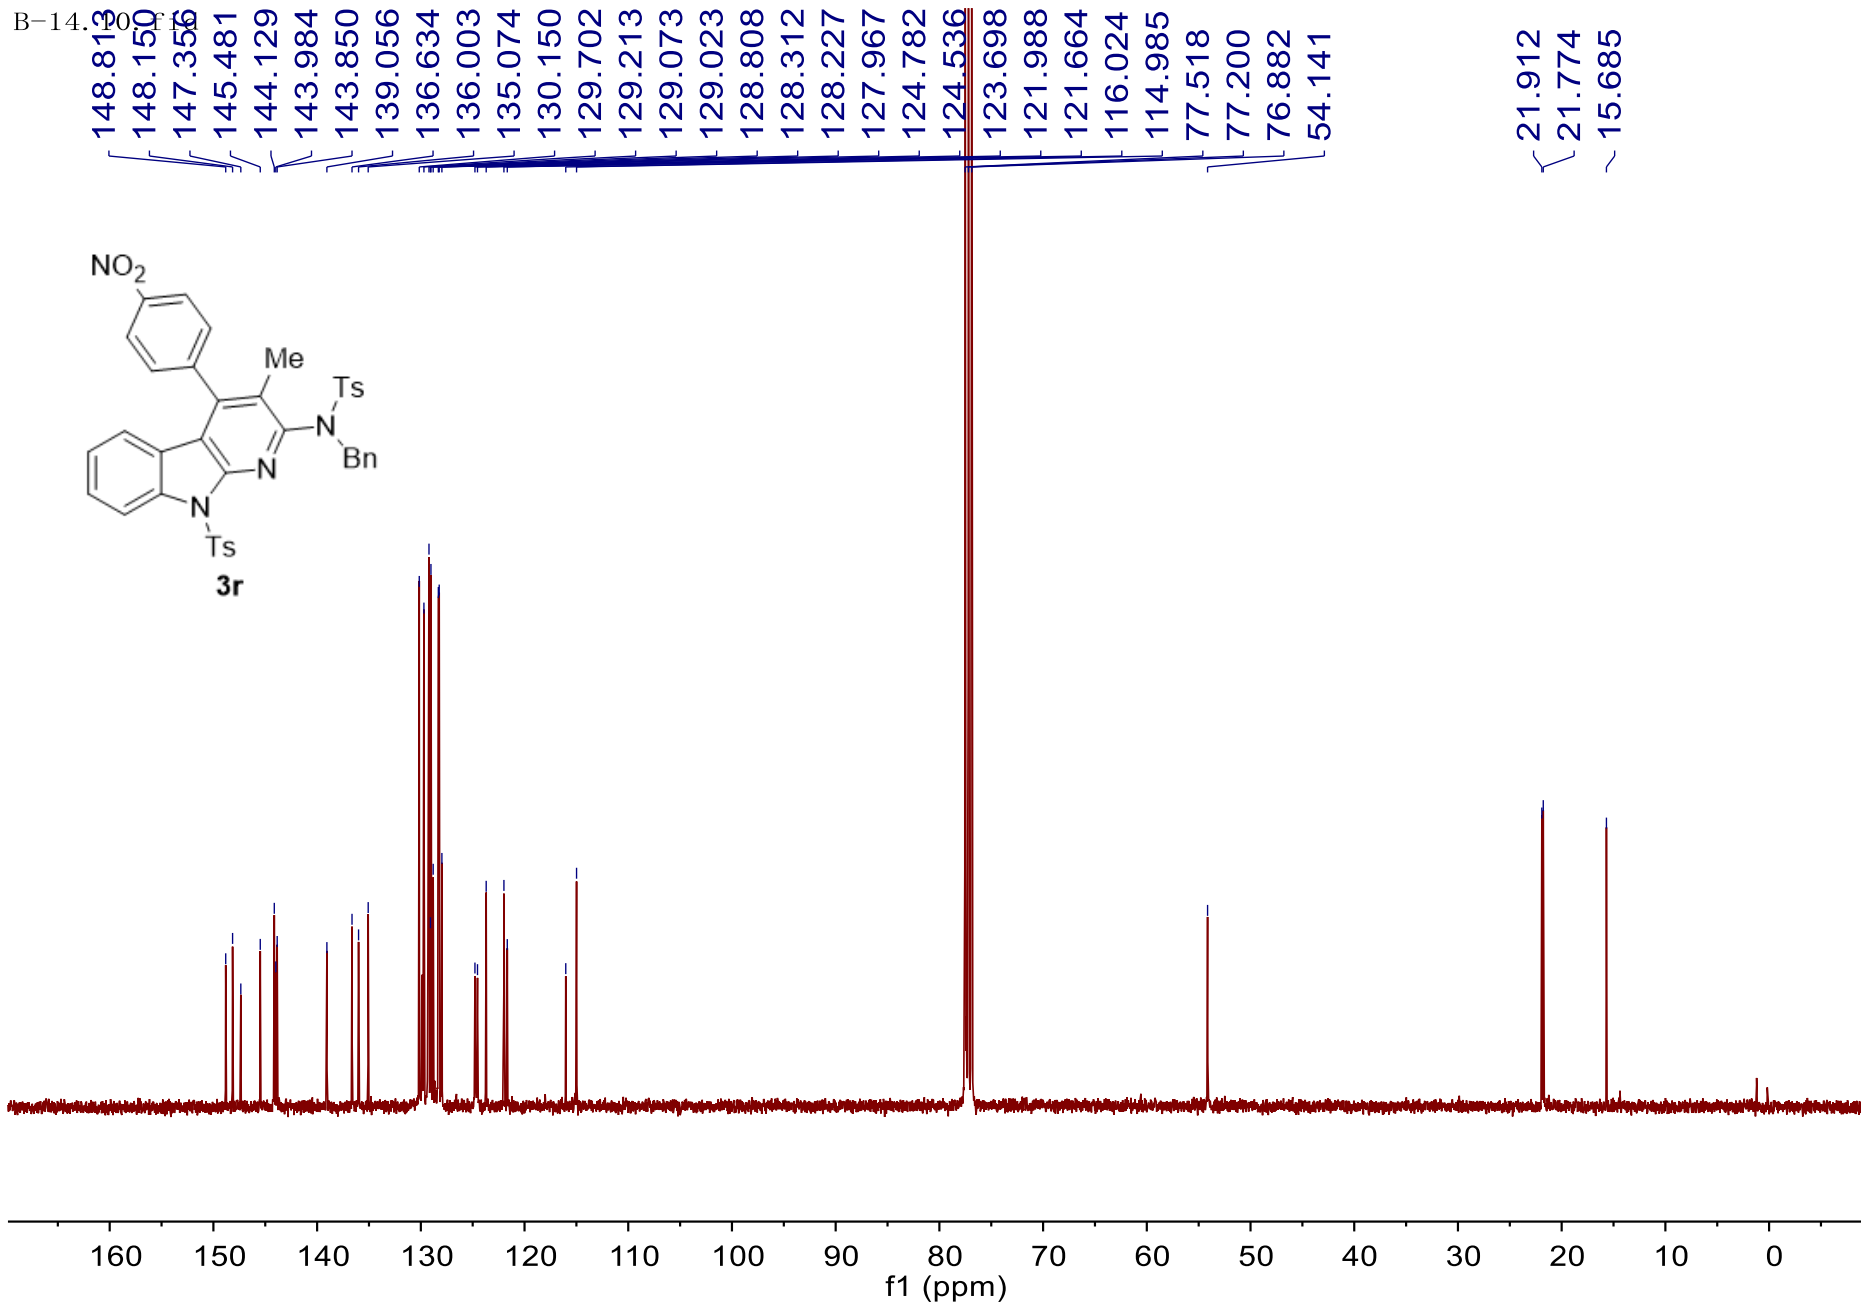

S104

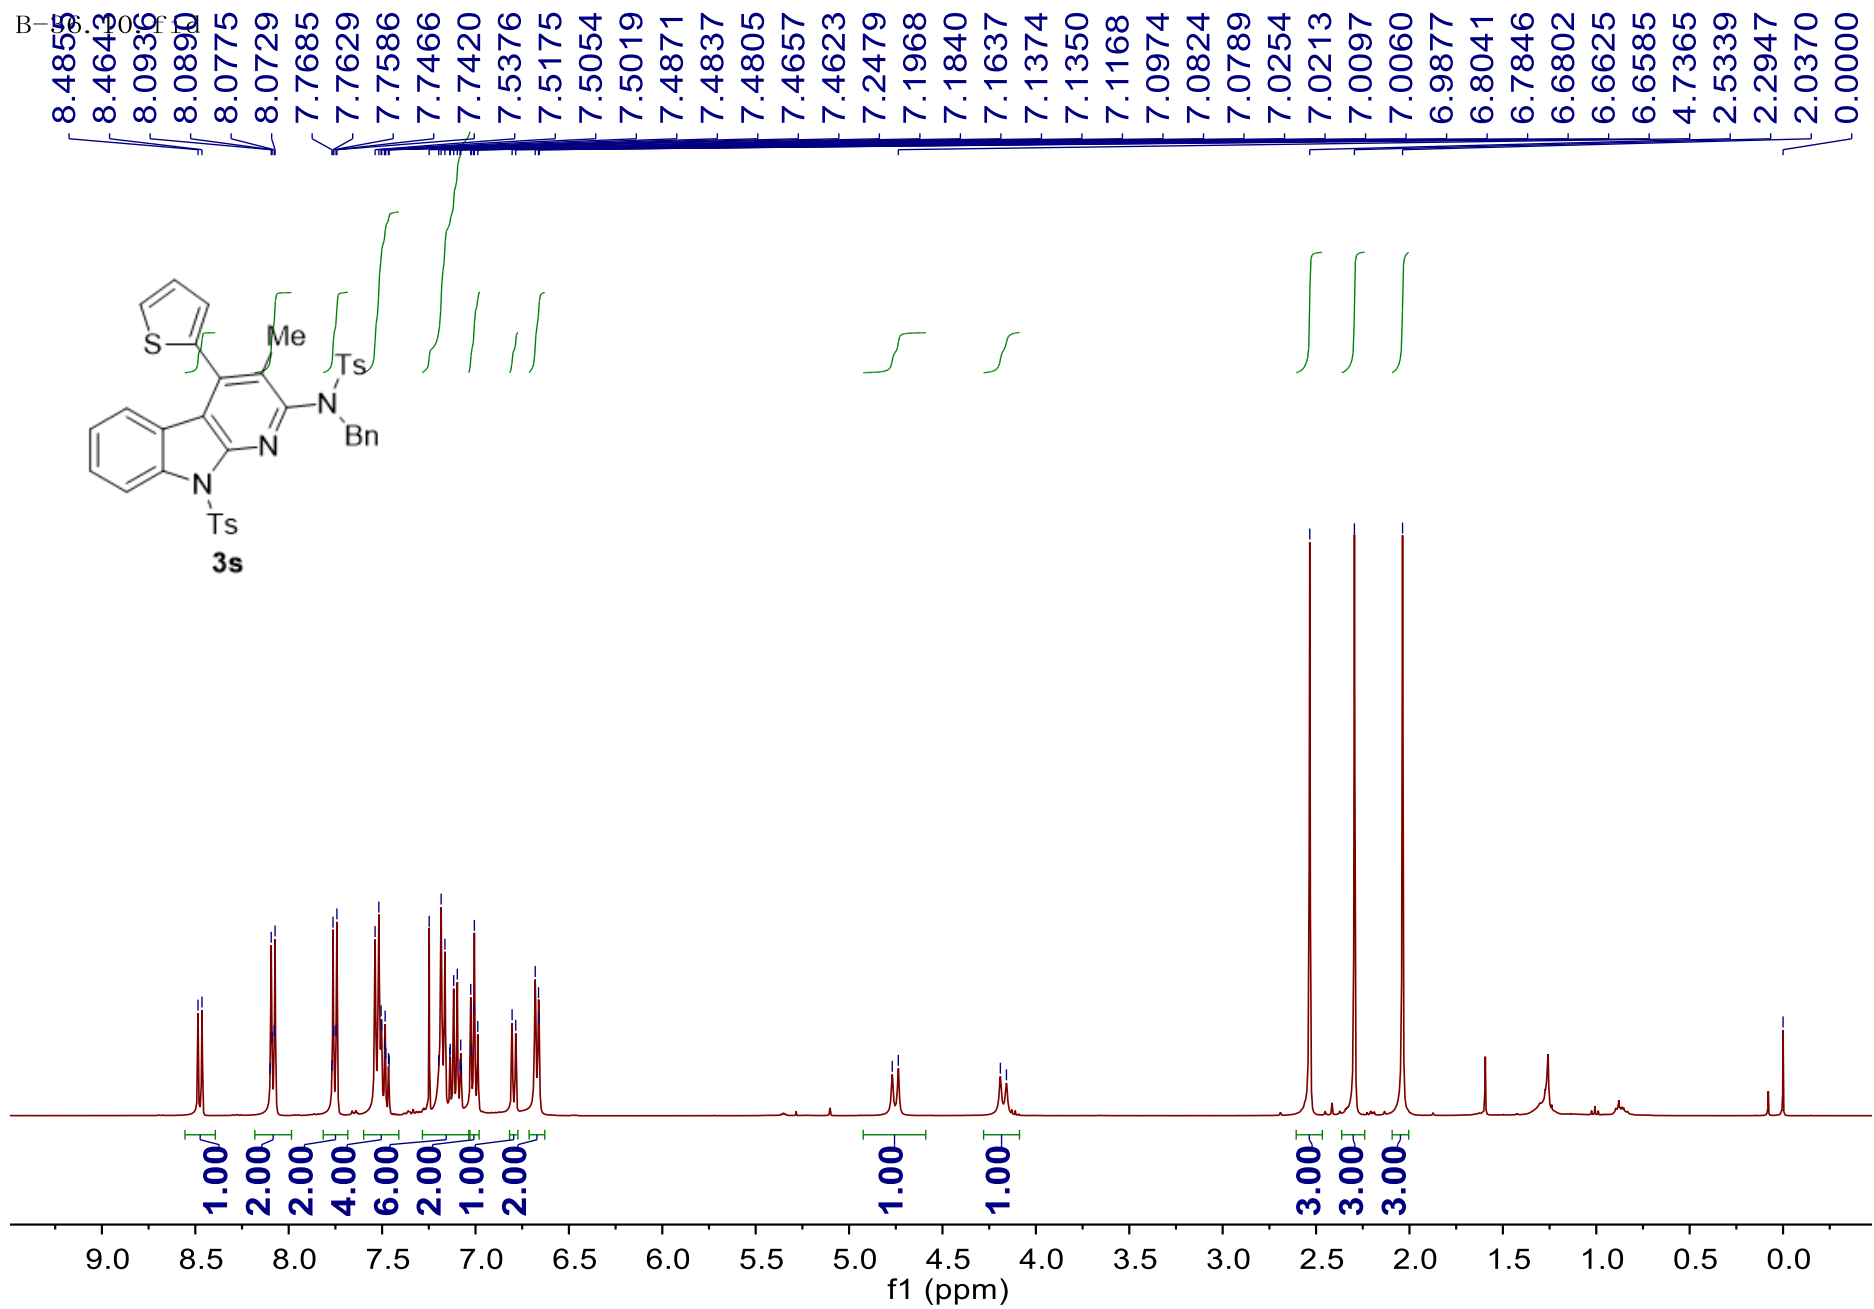

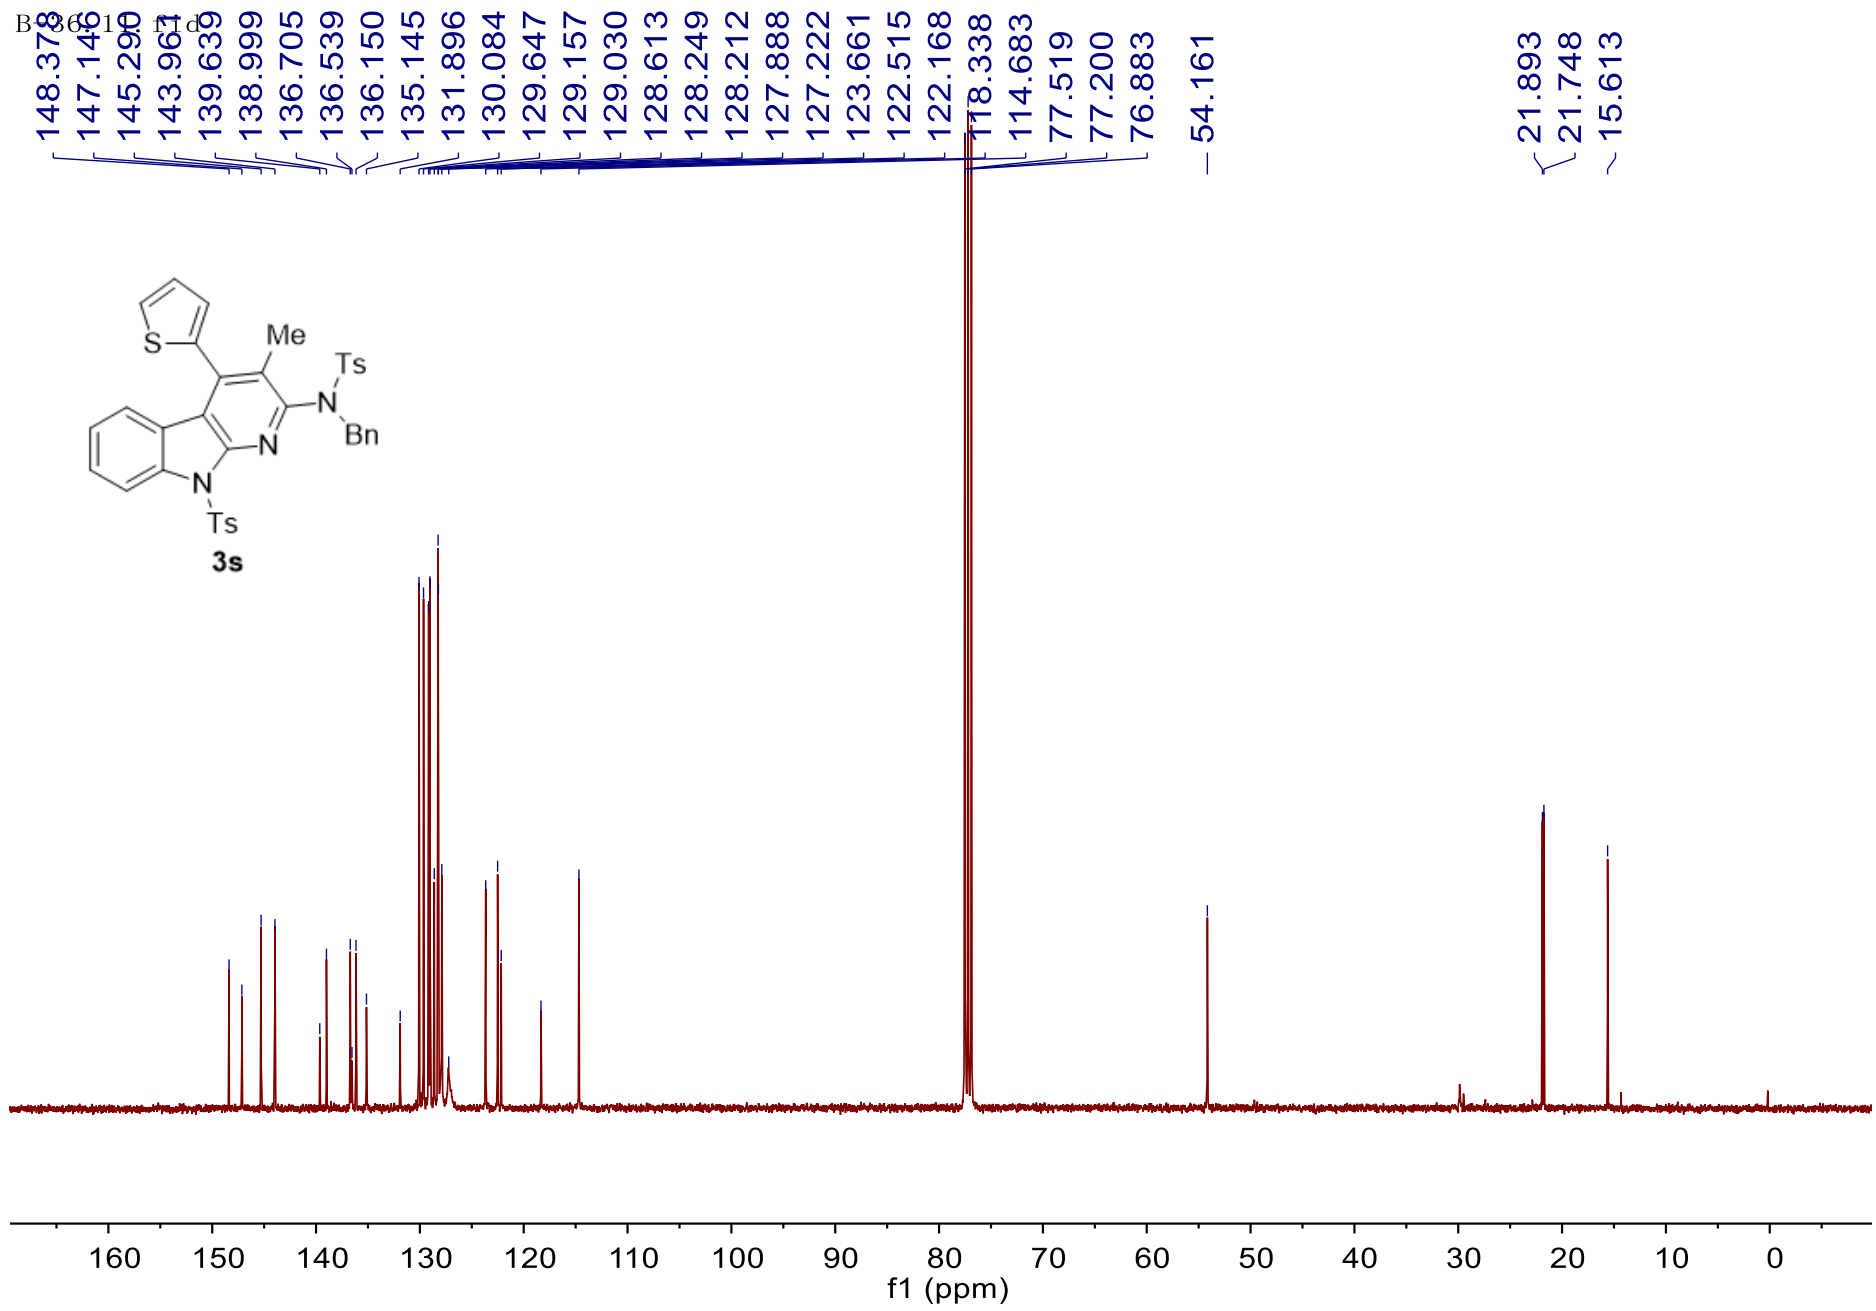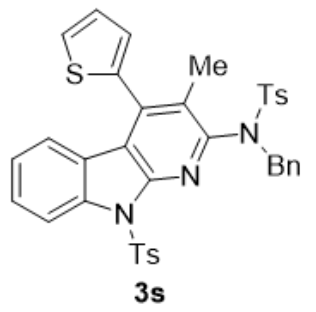

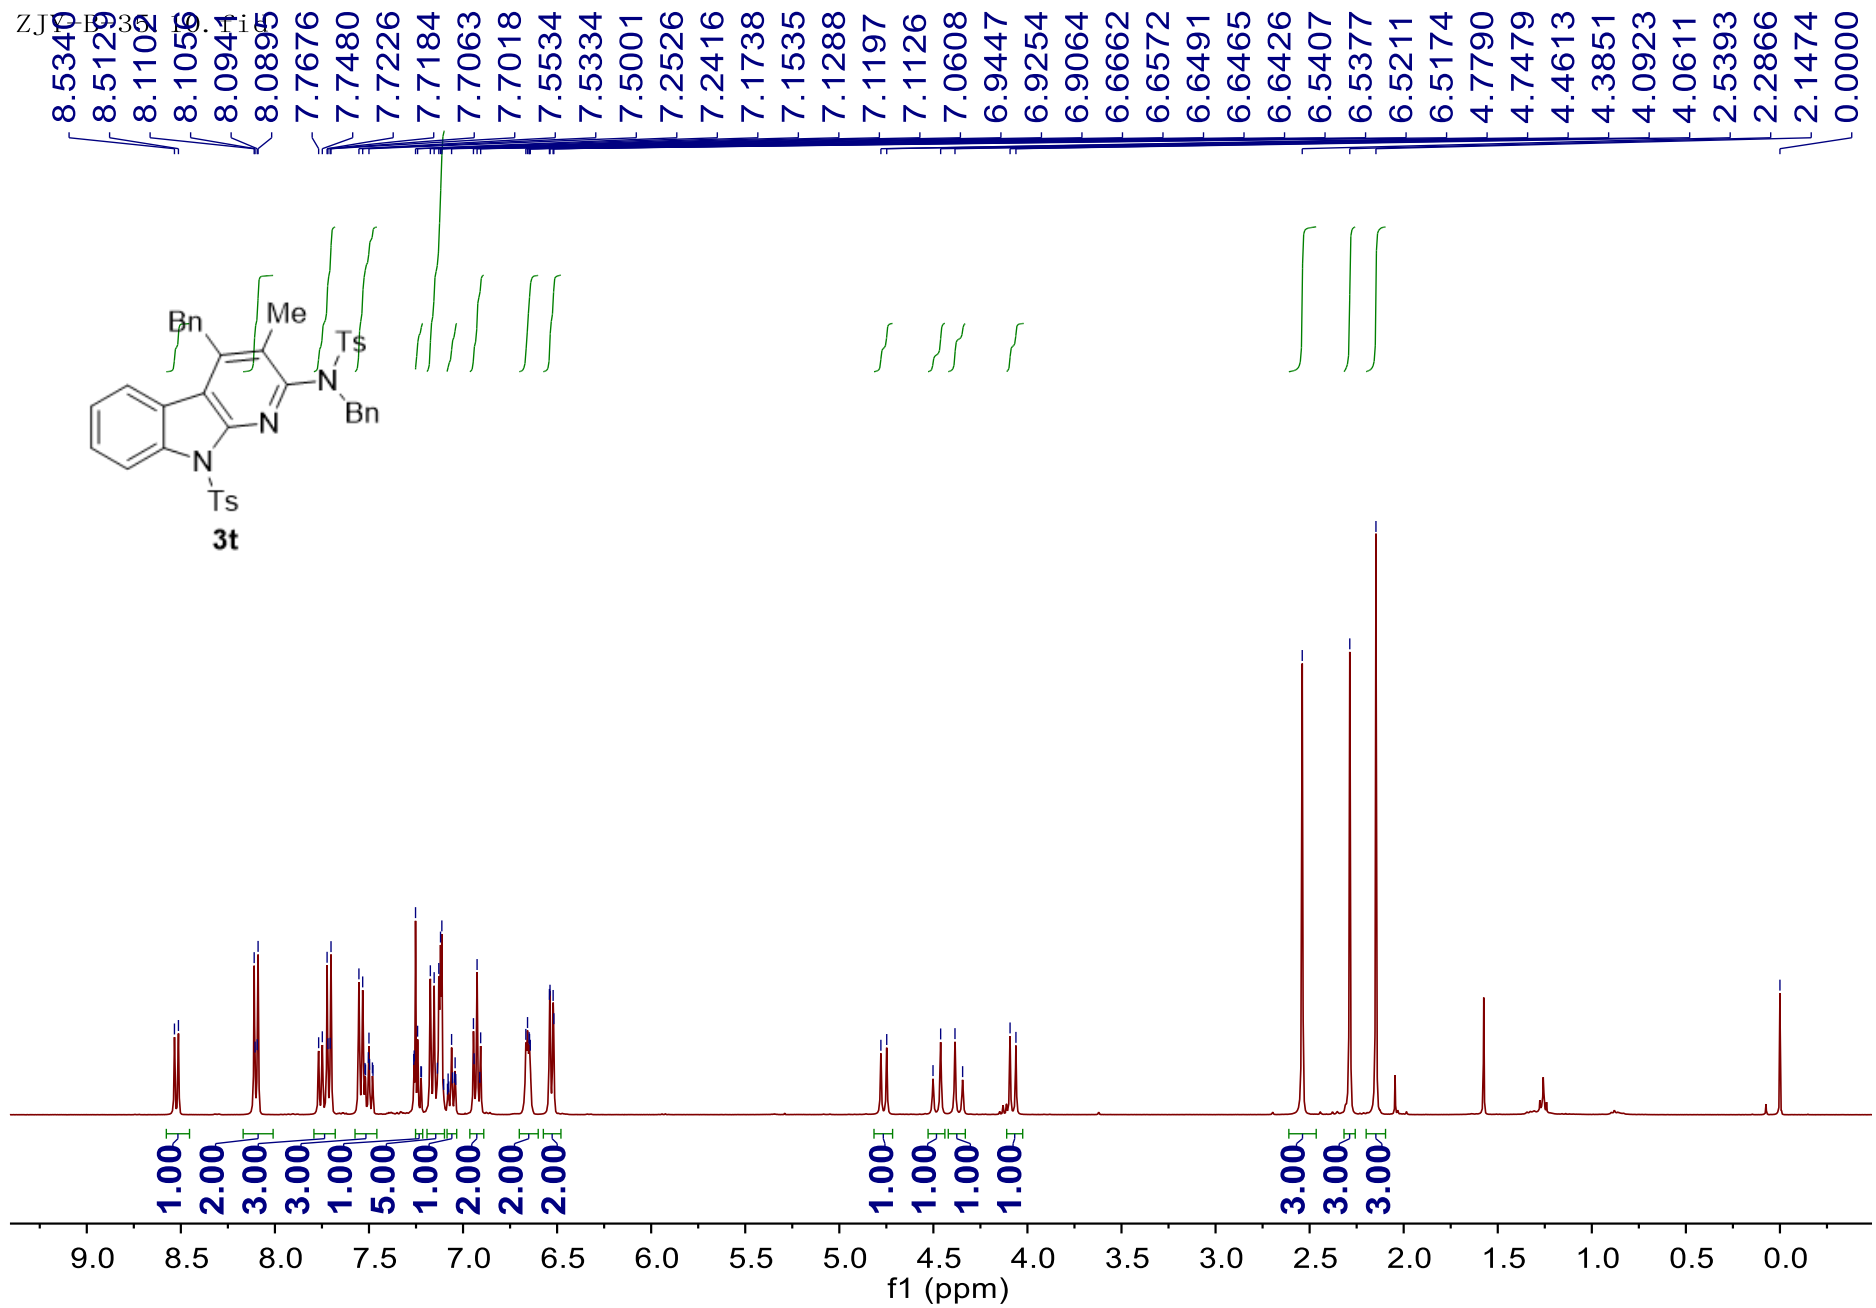



B-35. 0. f1

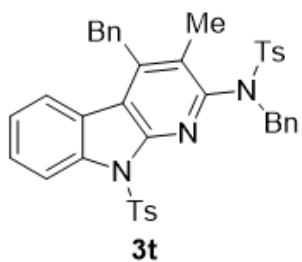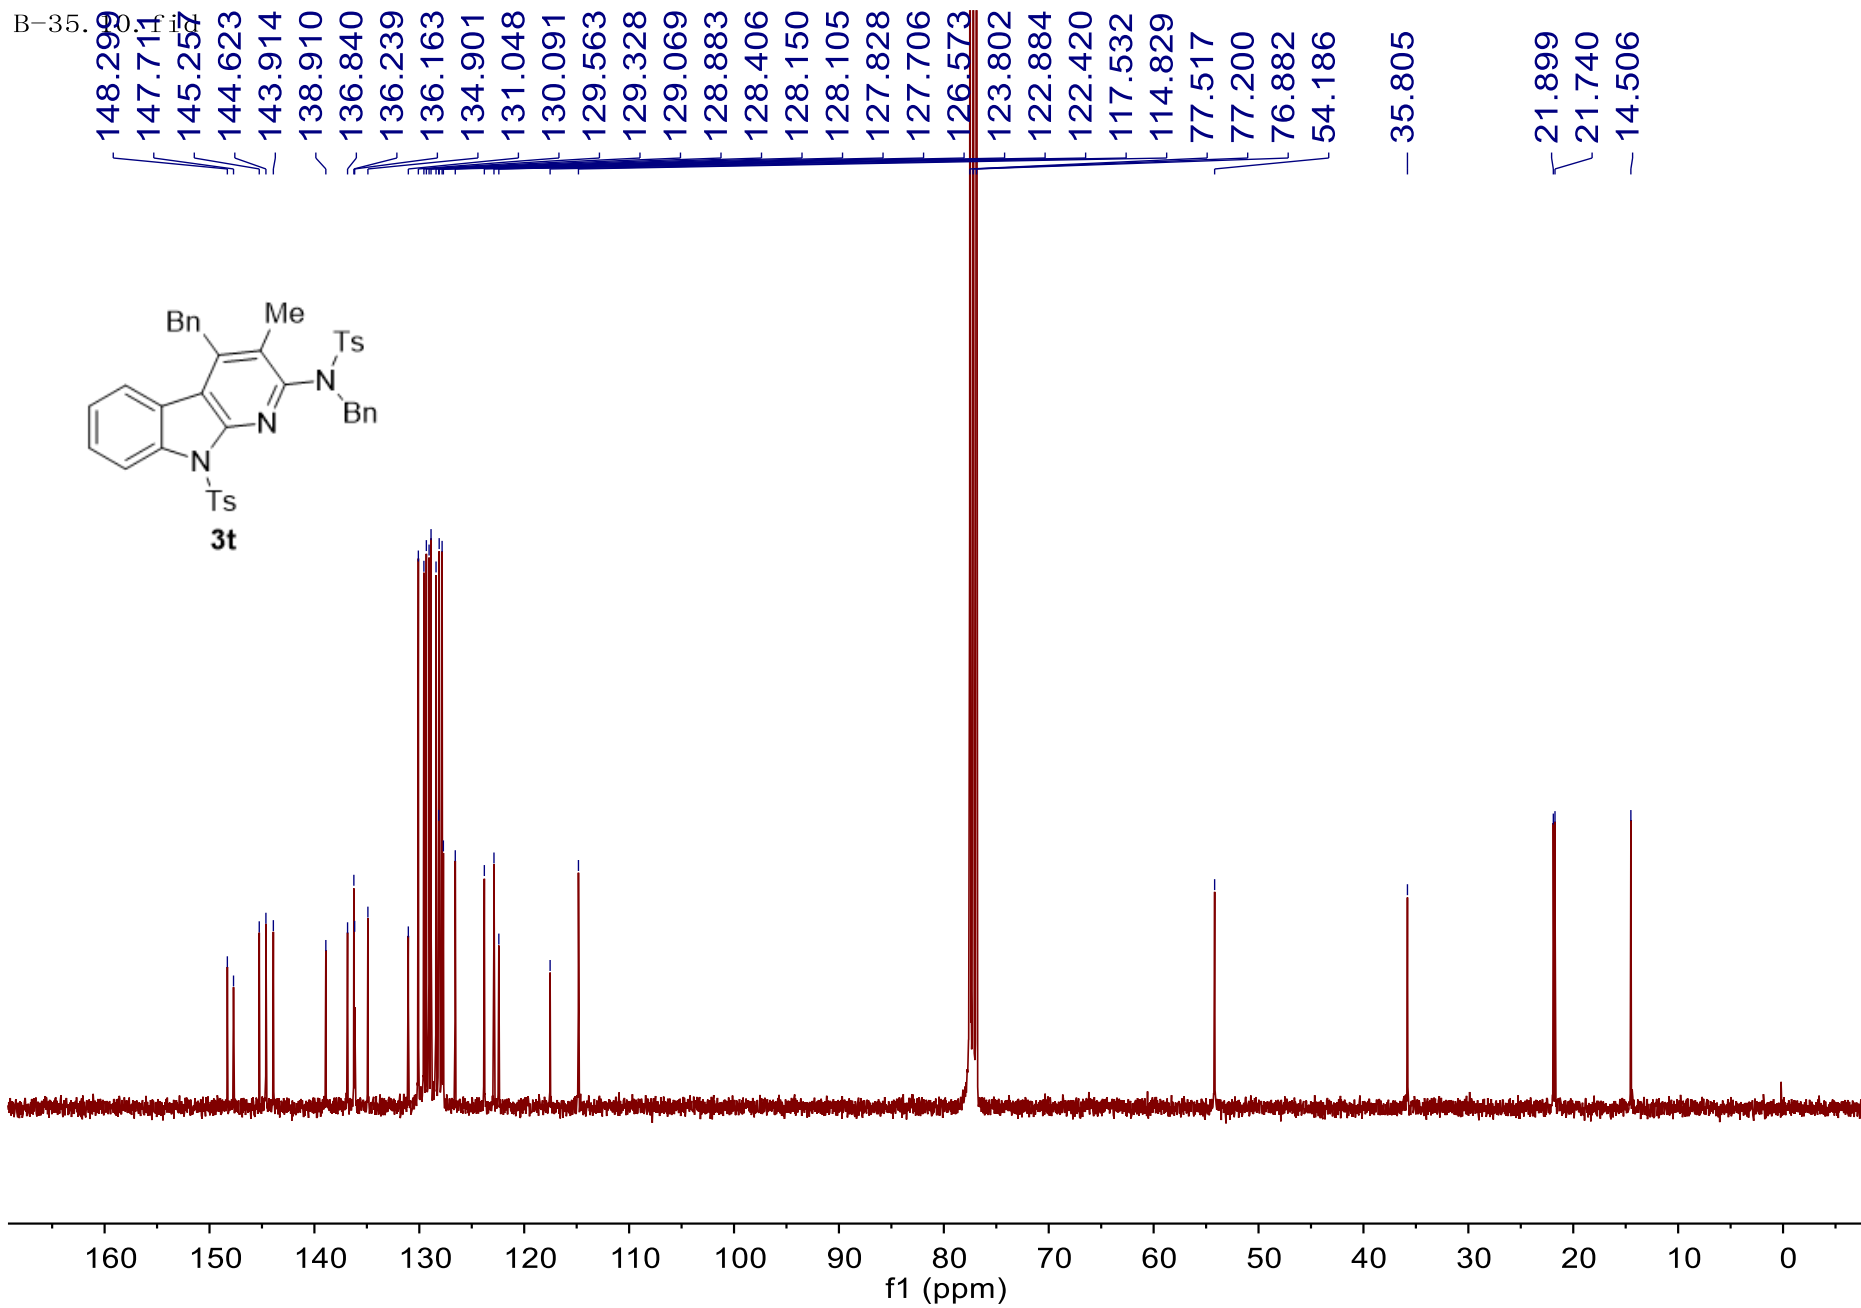

ZJ-13-10-f1d

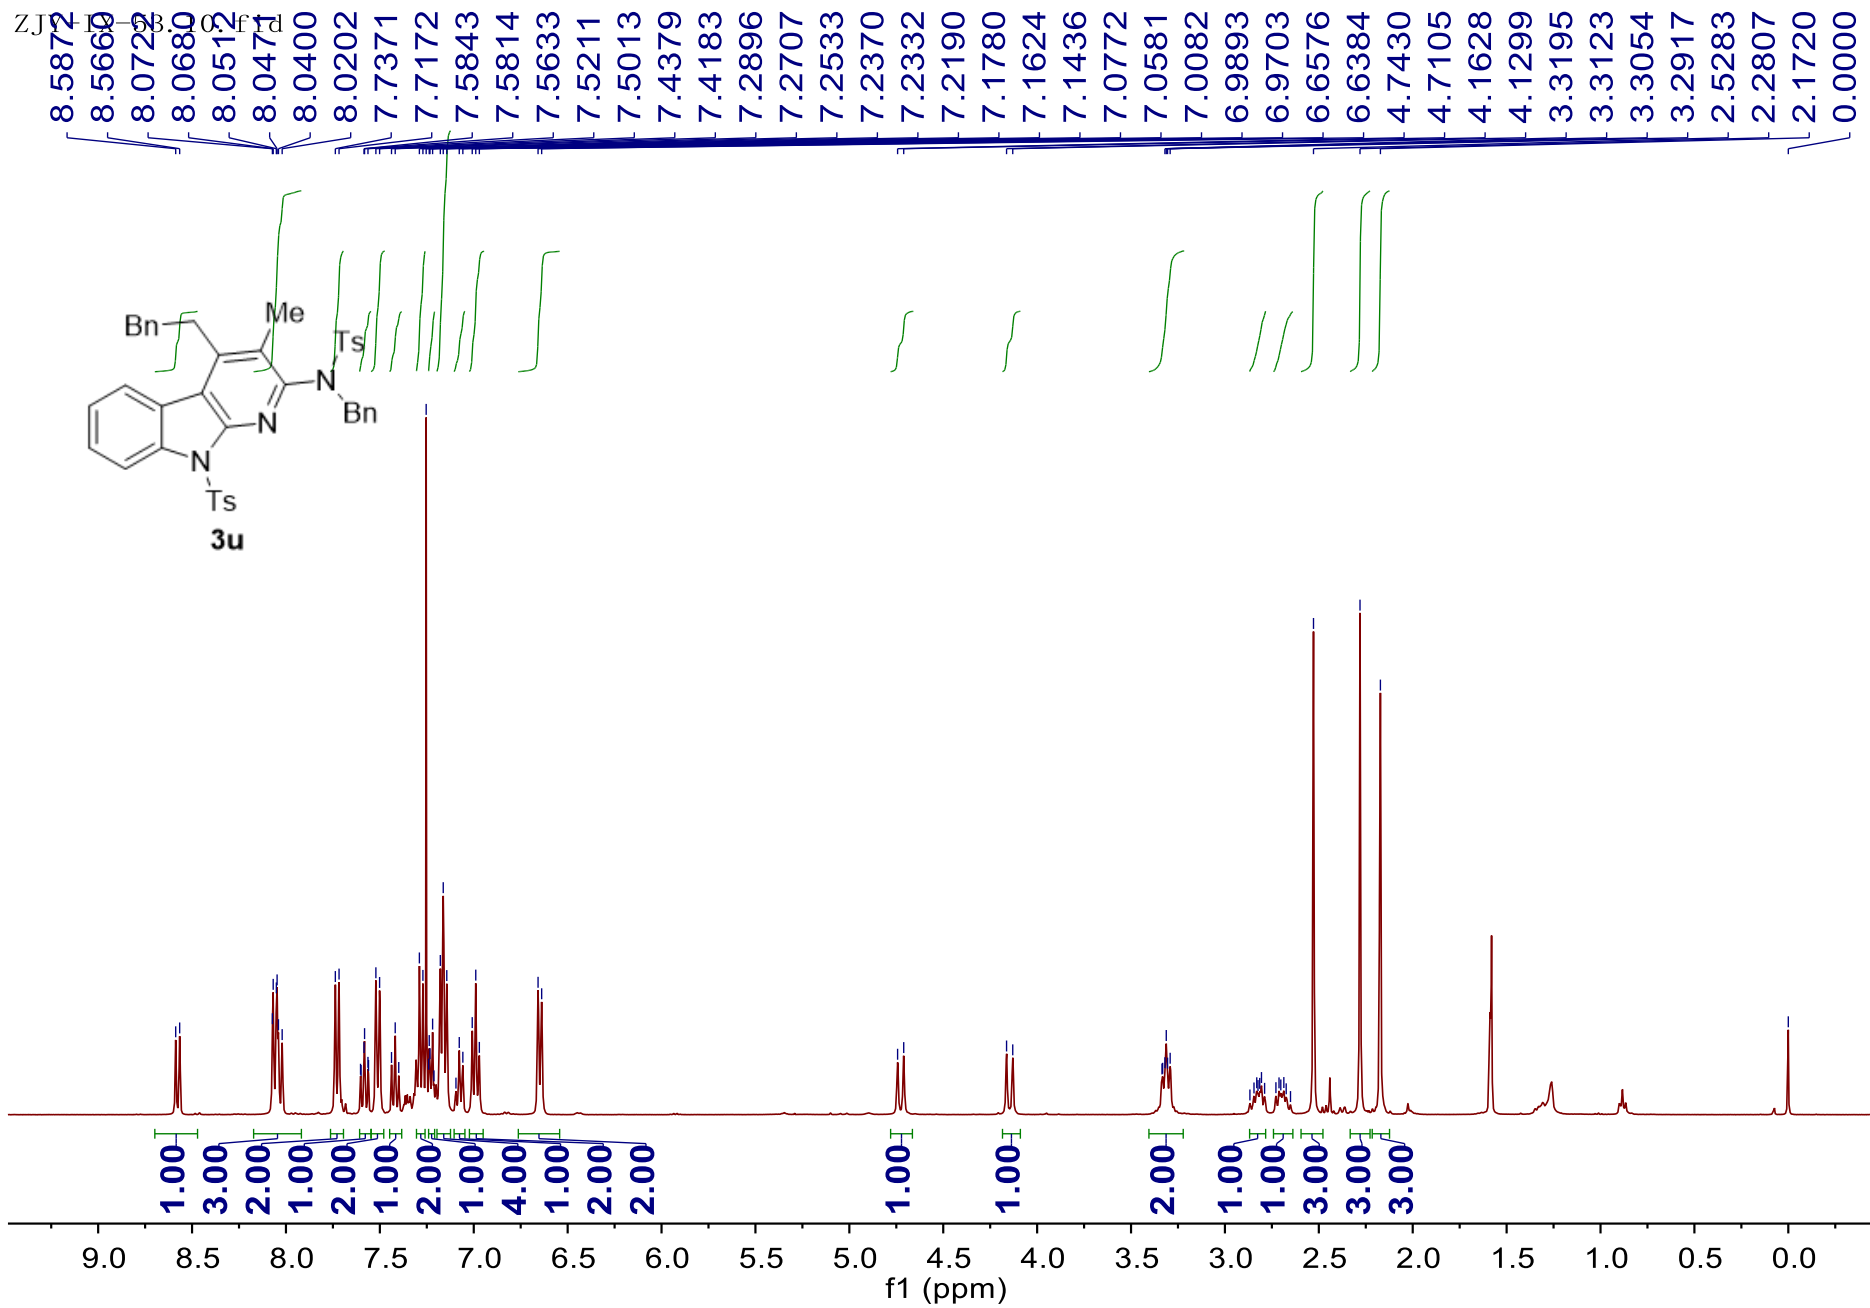

148.437  
147.707  
147.036  
145.165  
143.878  
140.708  
138.861  
136.862  
136.241  
135.295  
130.049  
129.635  
129.596  
129.188  
129.003  
128.876  
128.240  
128.227  
128.159  
128.102  
127.793  
126.624  
123.948  
122.597  
116.622  
115.100  
77.517  
77.200  
76.883  
54.038

34.027  
32.425

21.877  
21.719  
14.134

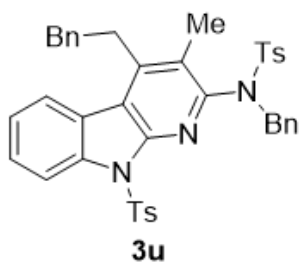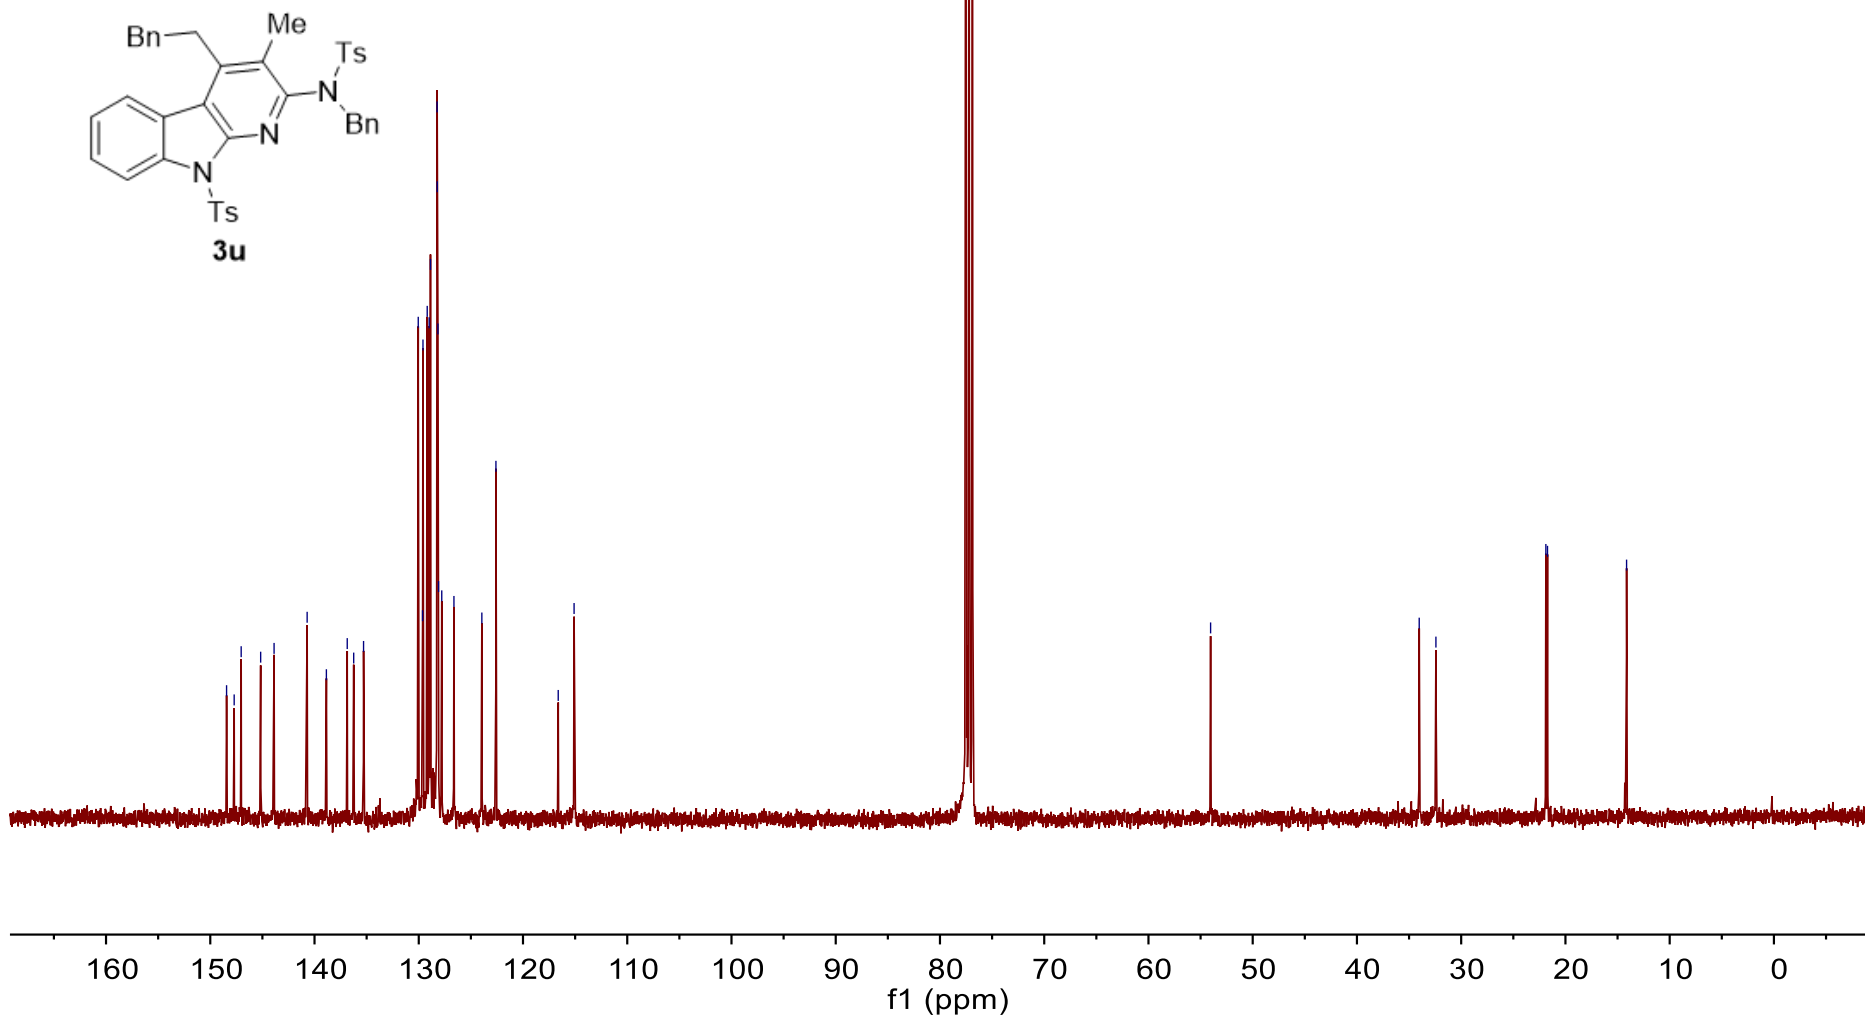

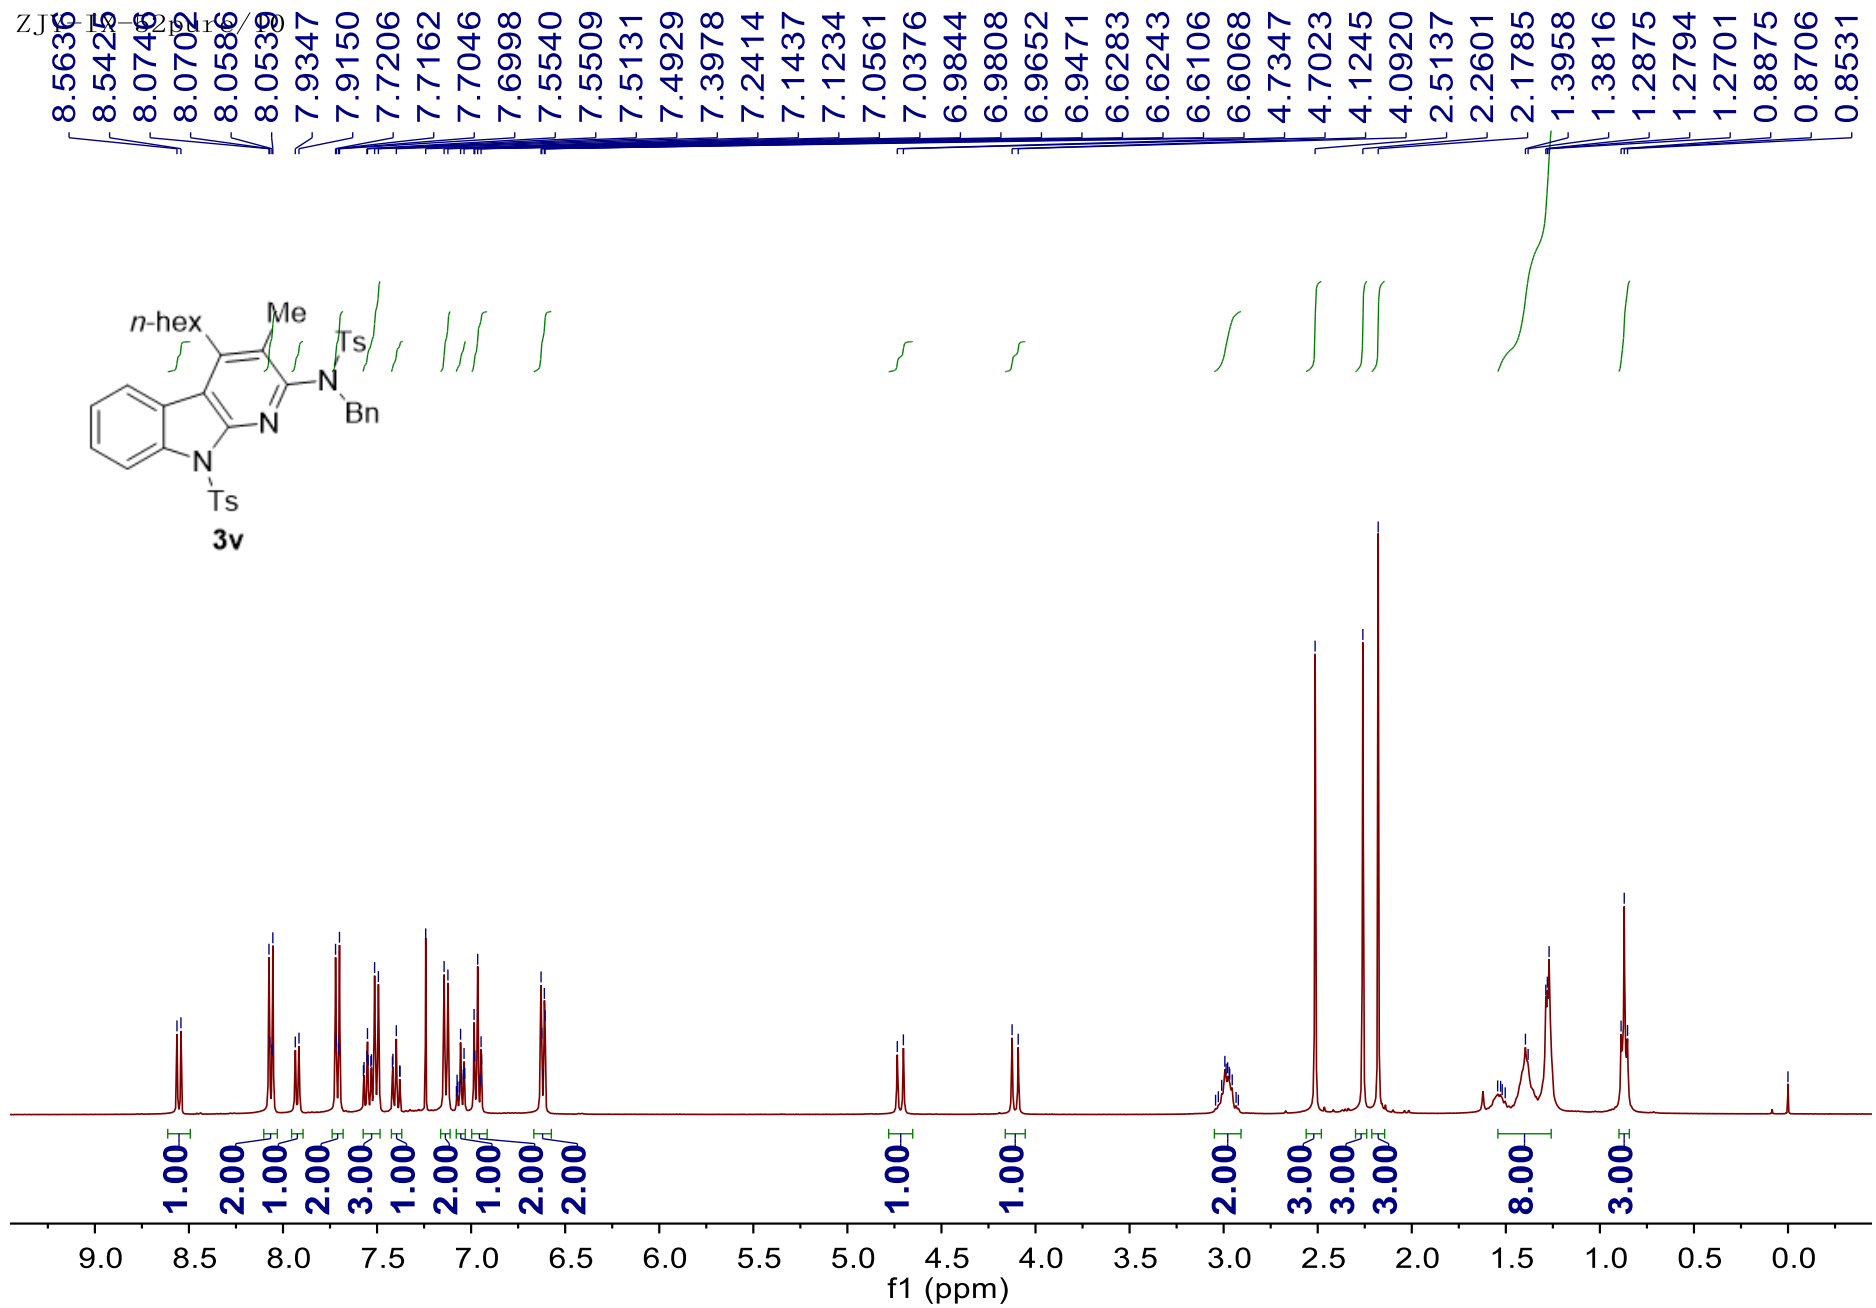

ZJY-91X-52pure791

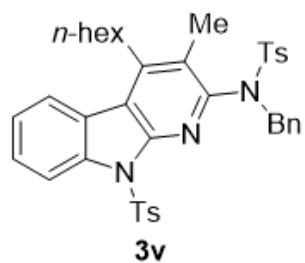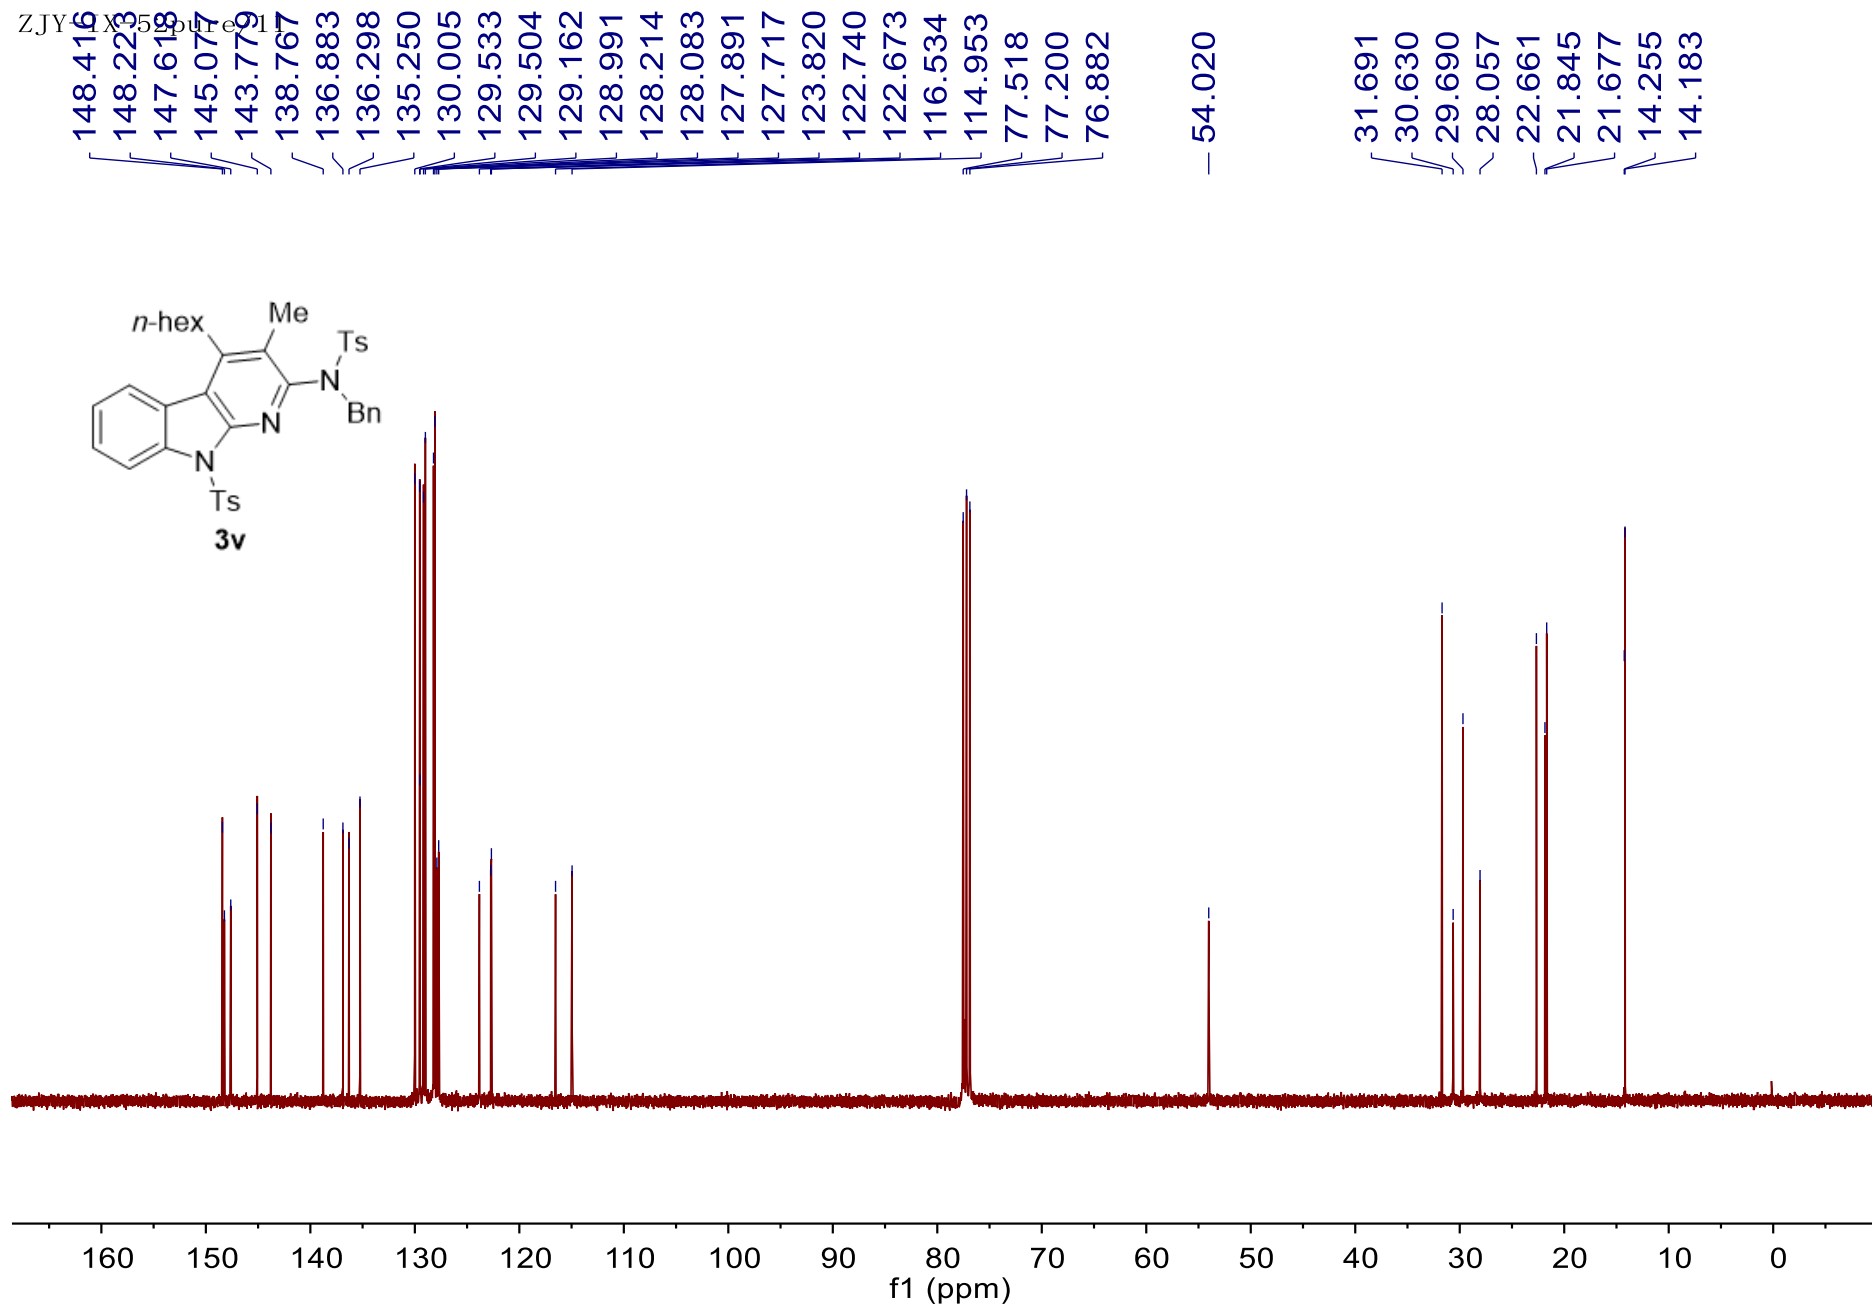

ZJ-150-100f31

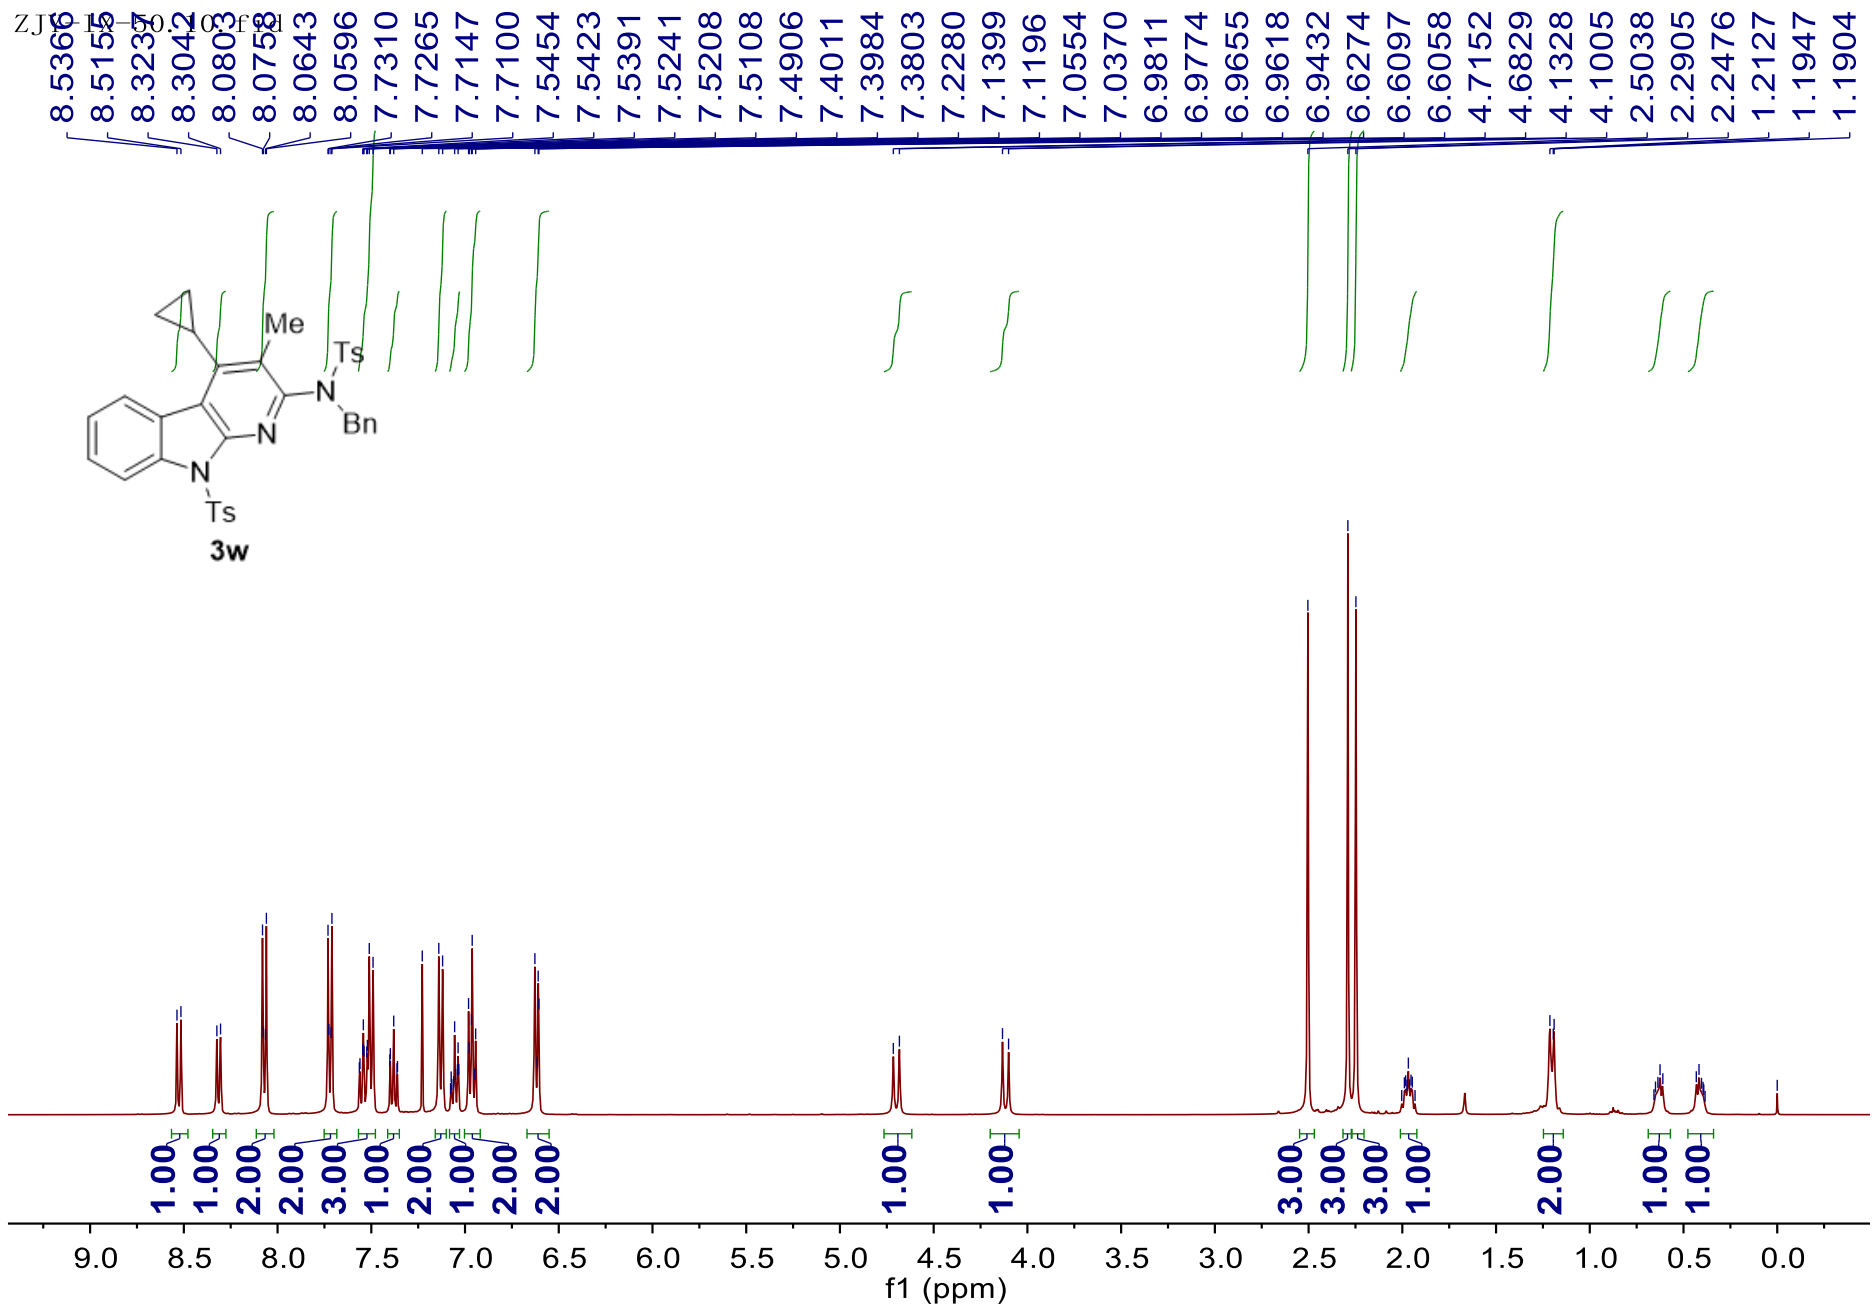

ZJY-EX-517-1c

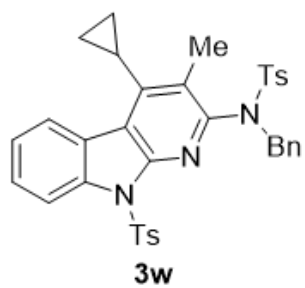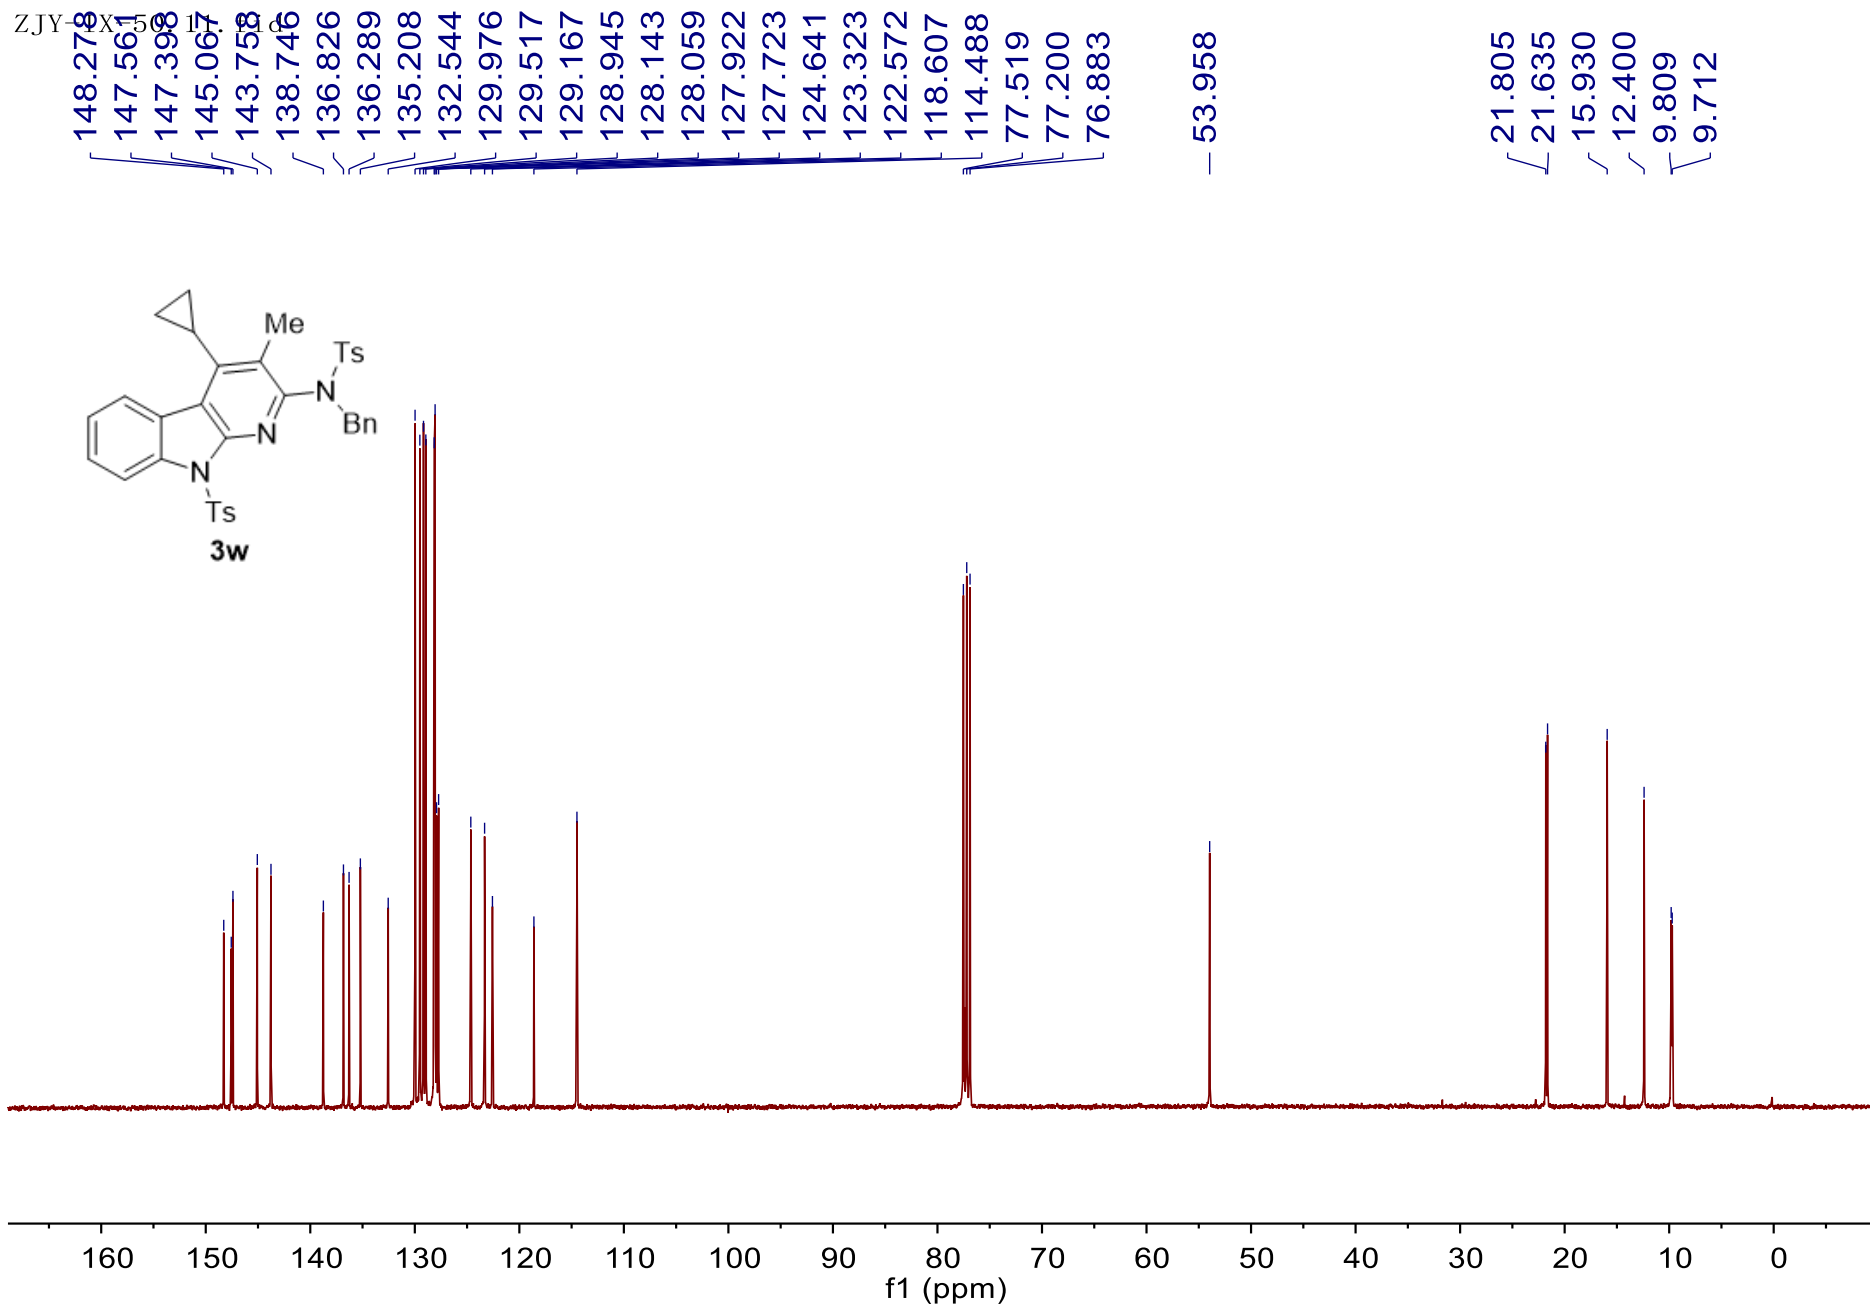

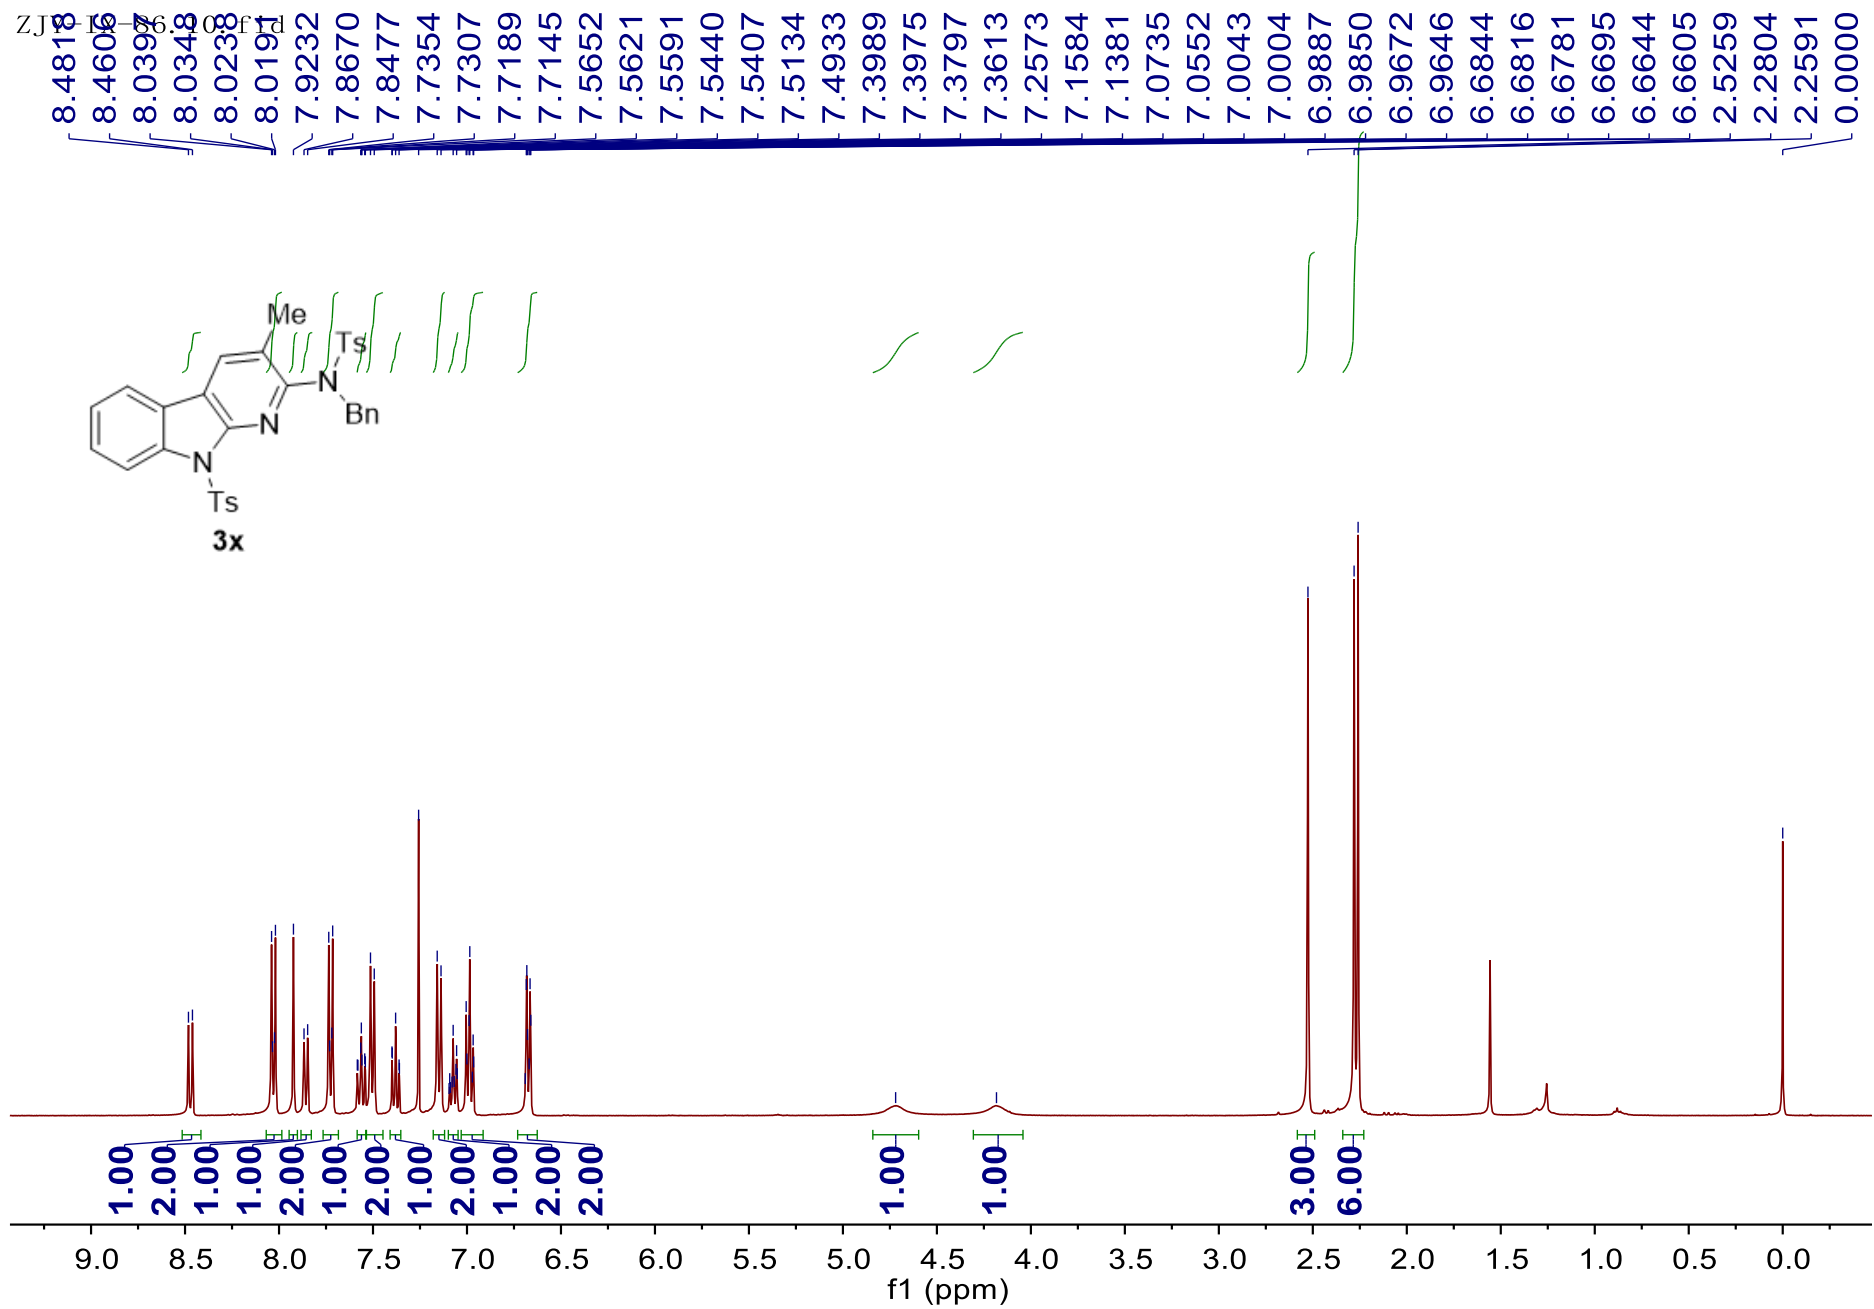



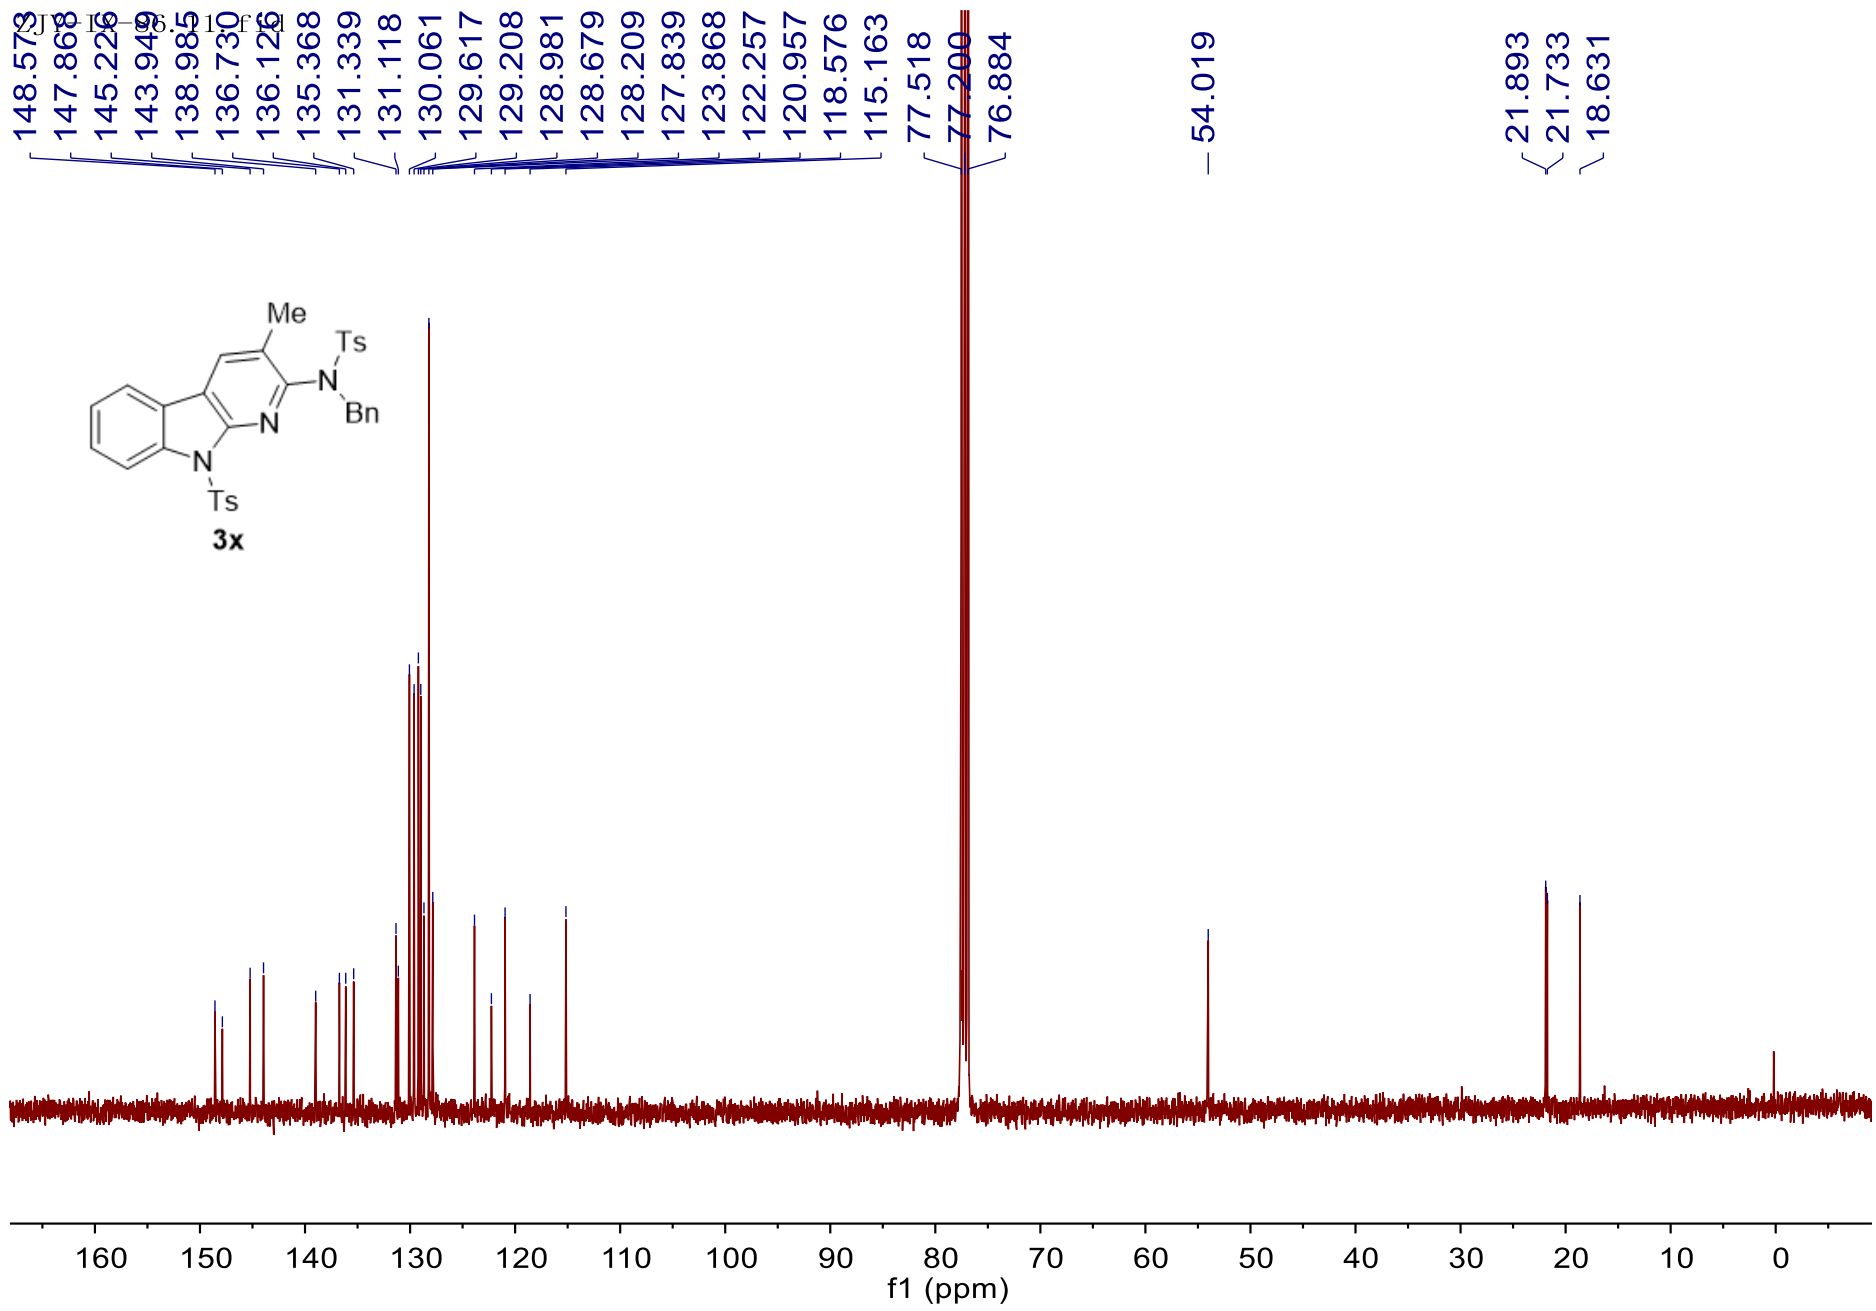

ZJY-IX-88-10.fid

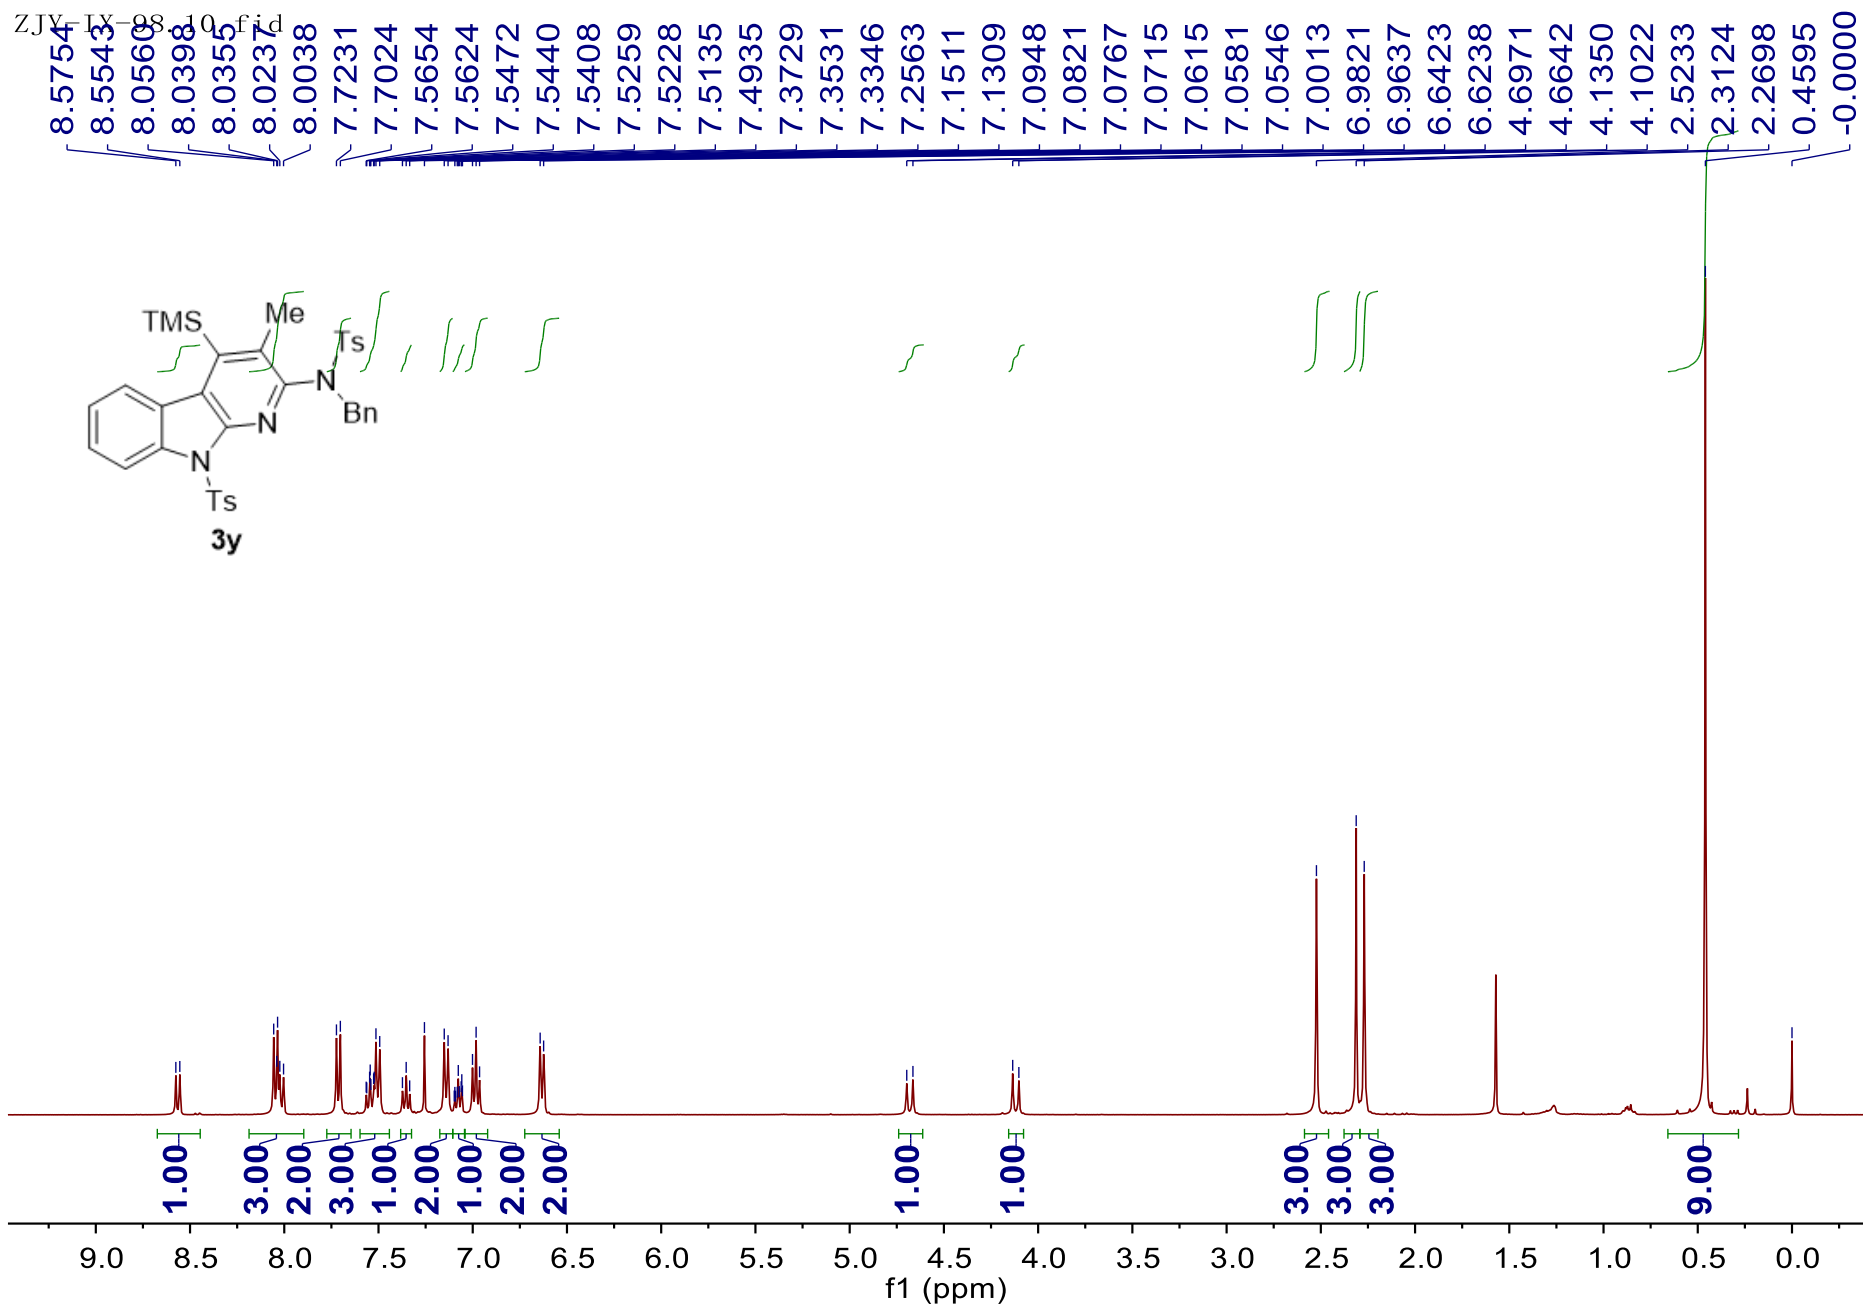

ZJY-X-081

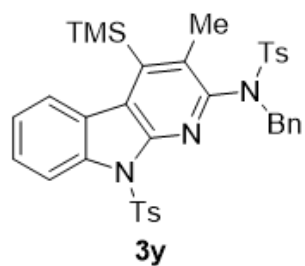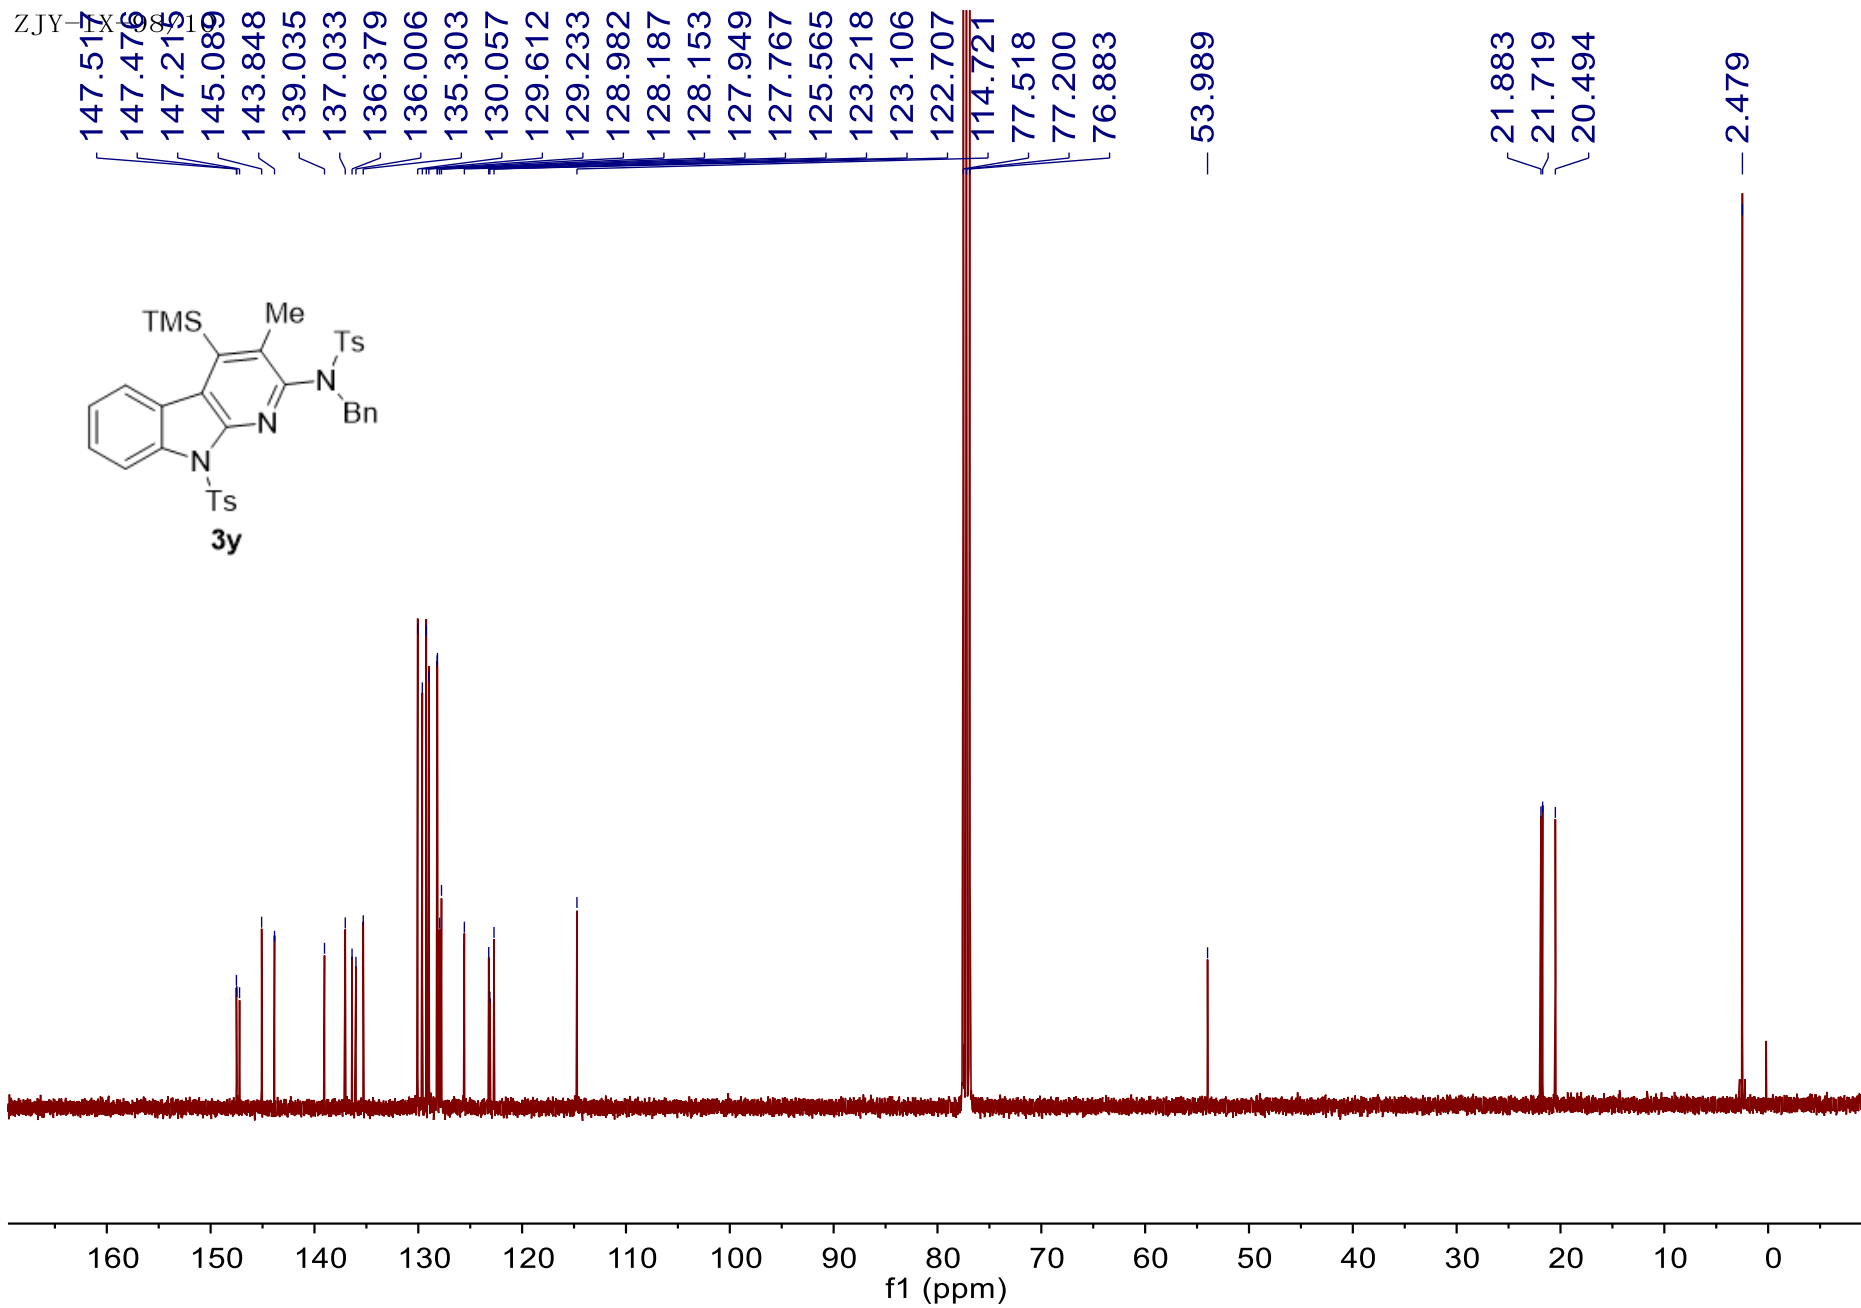



ZJY-XX-9511-11.f02

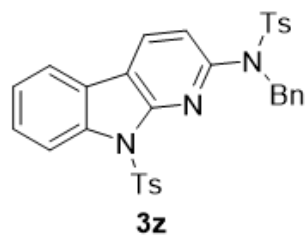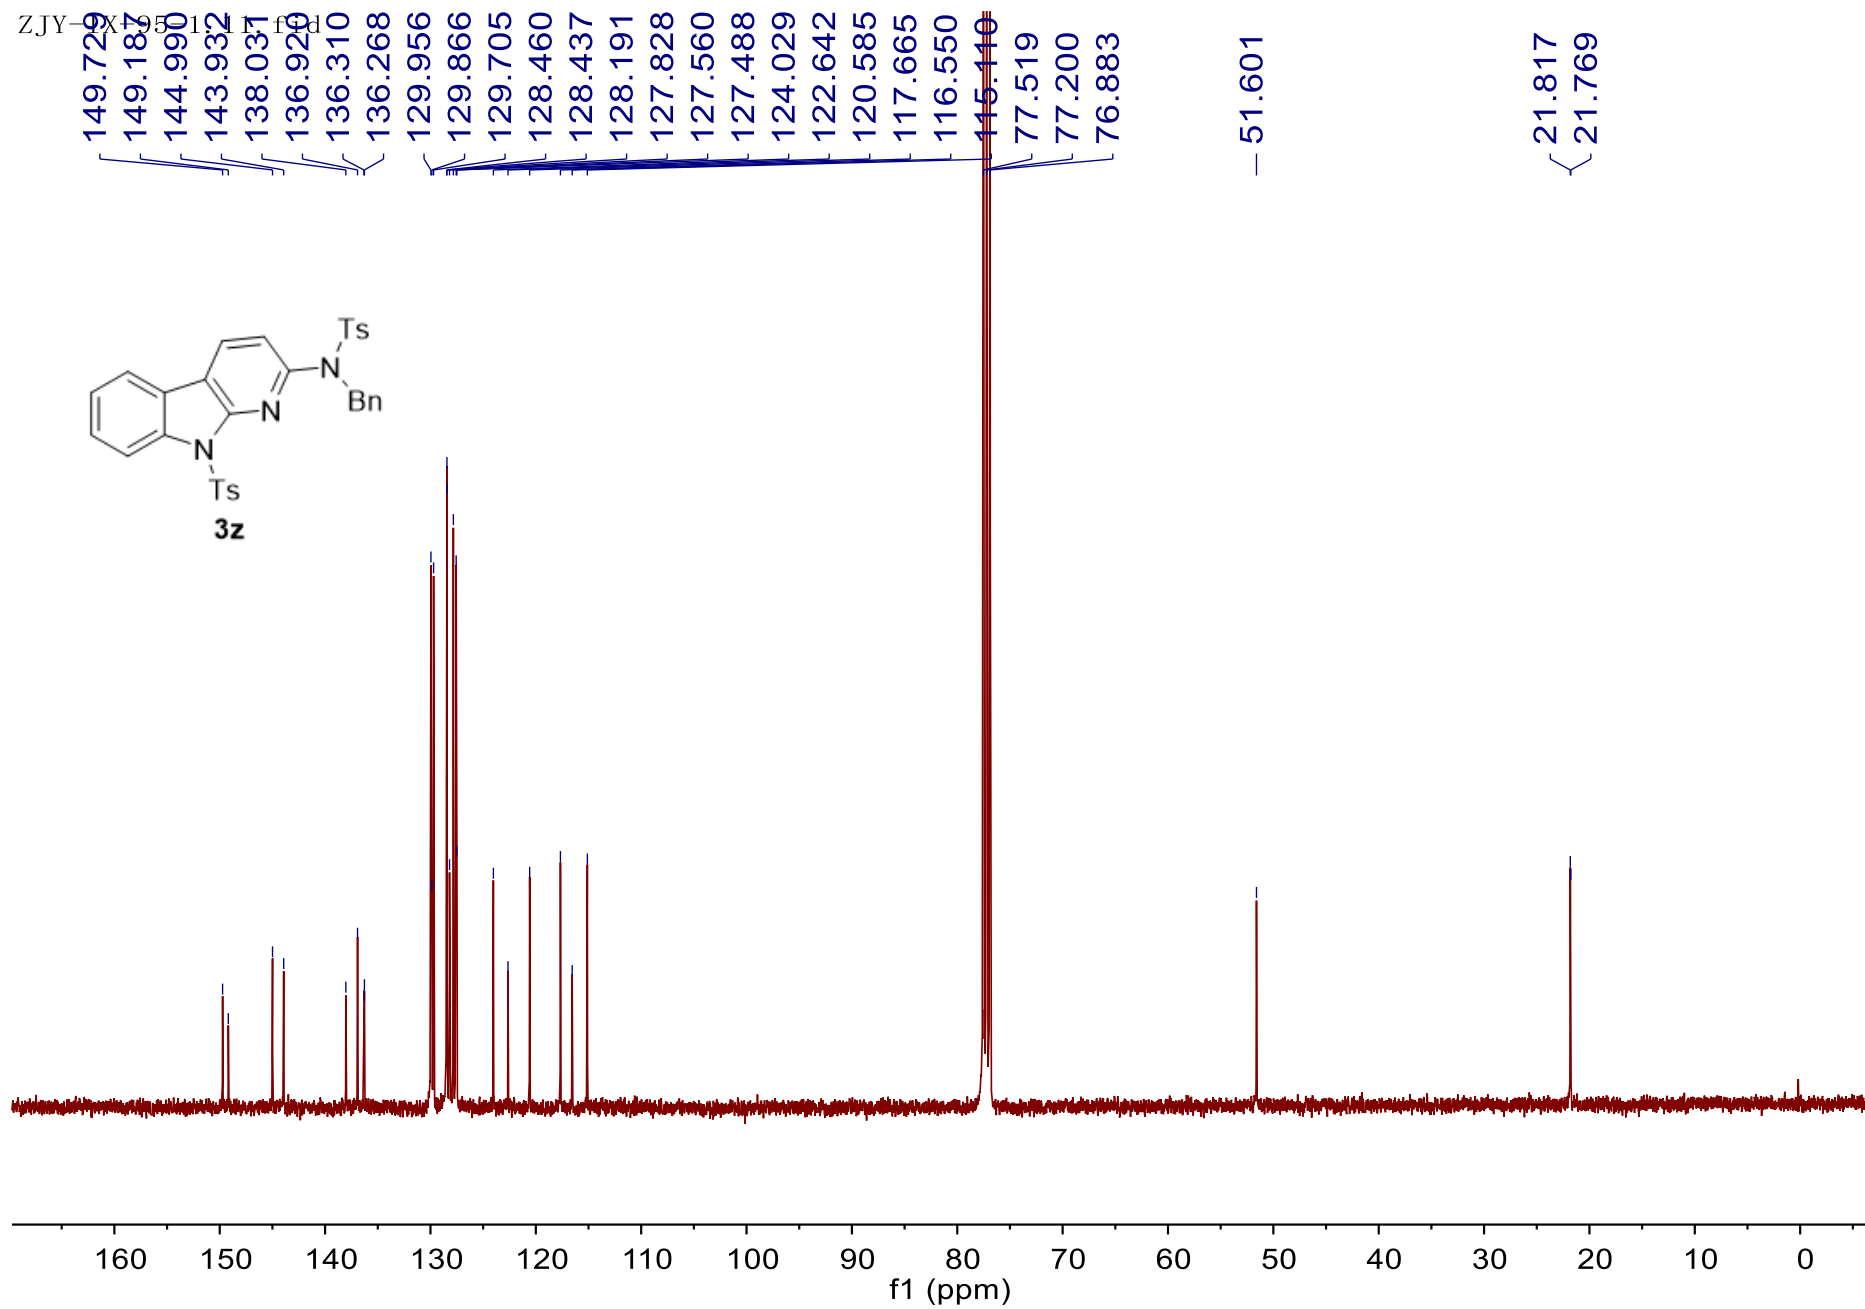

S120

ZJY-IX-8.10.fid

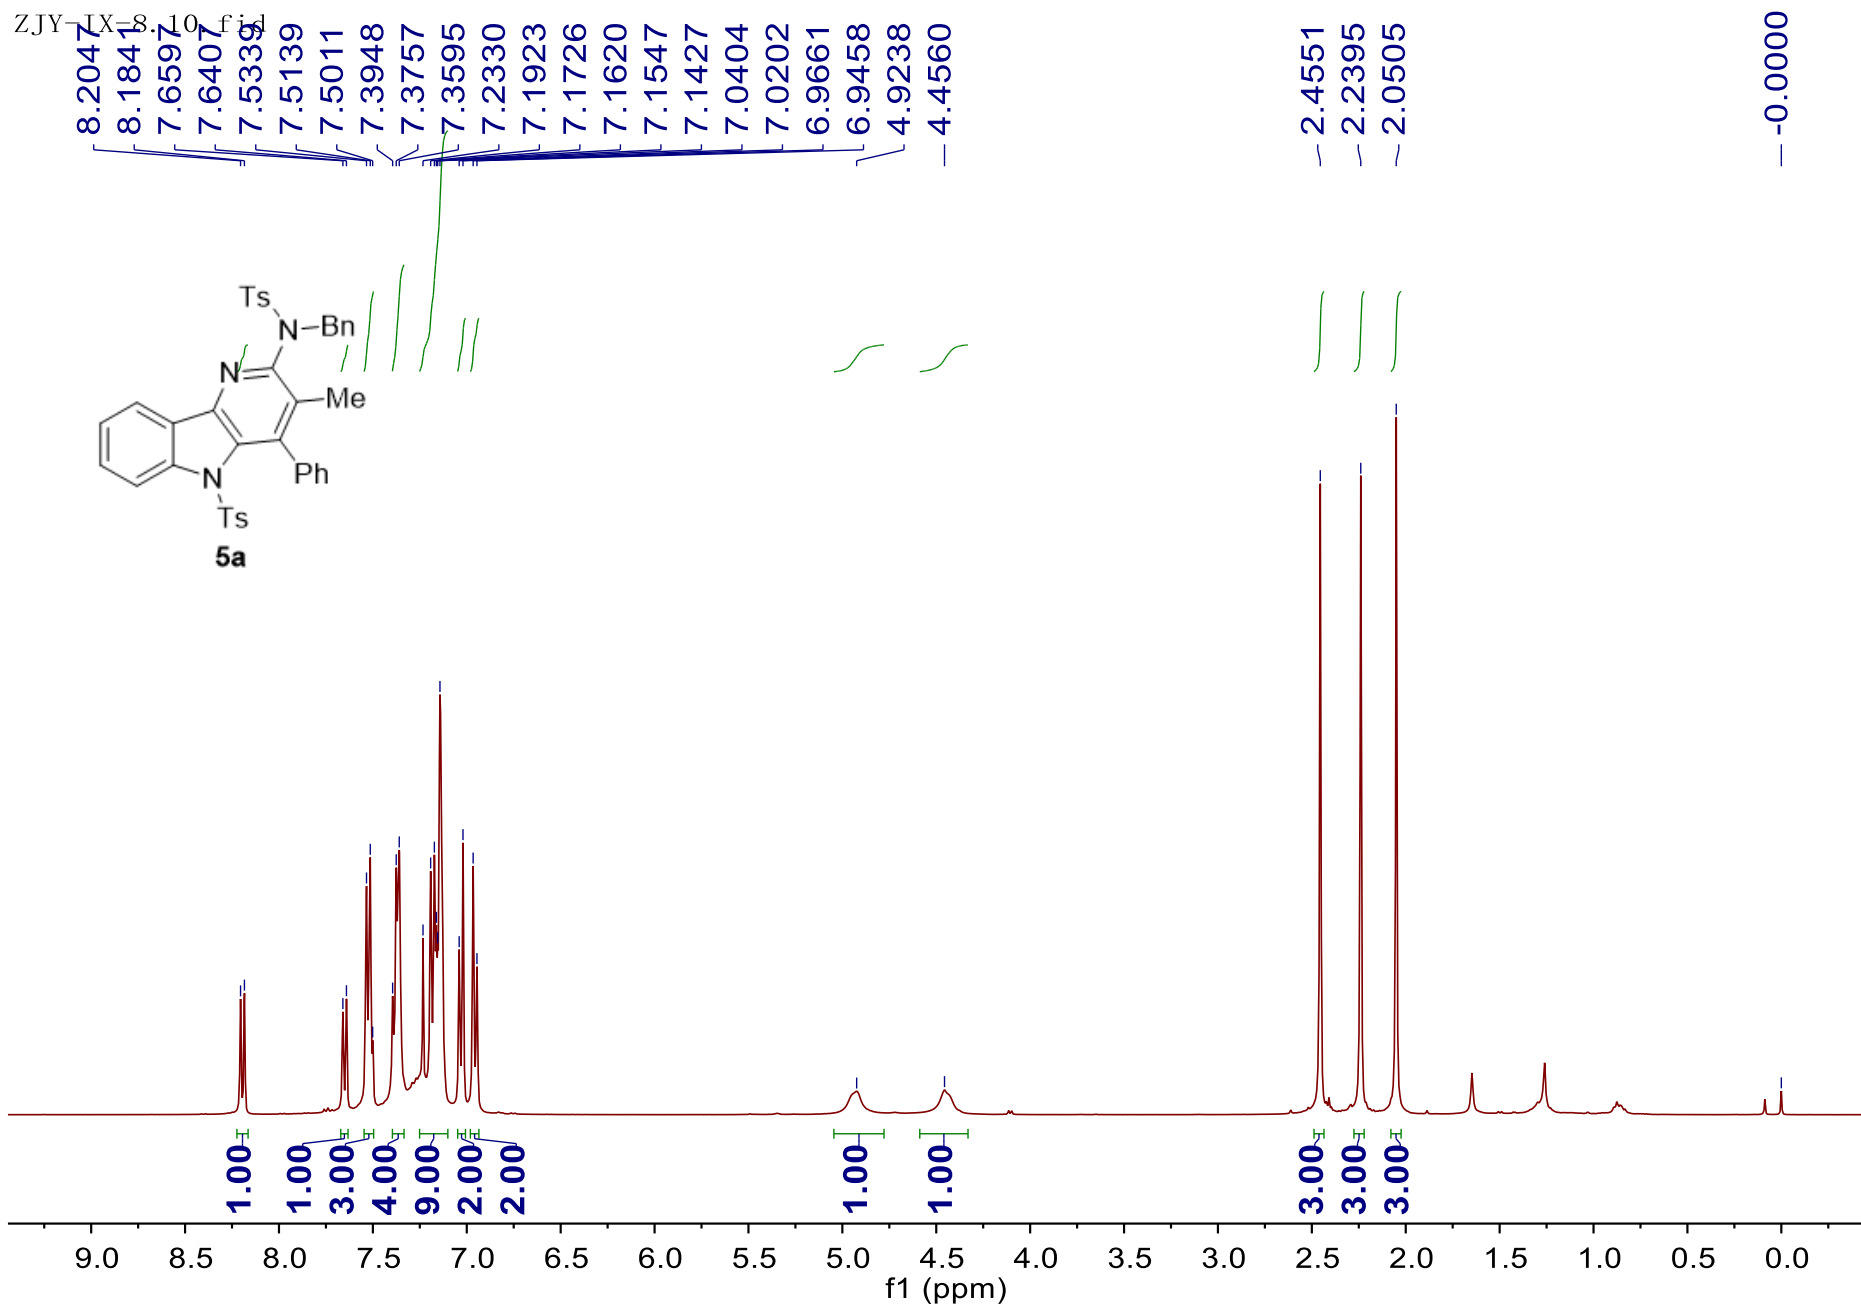

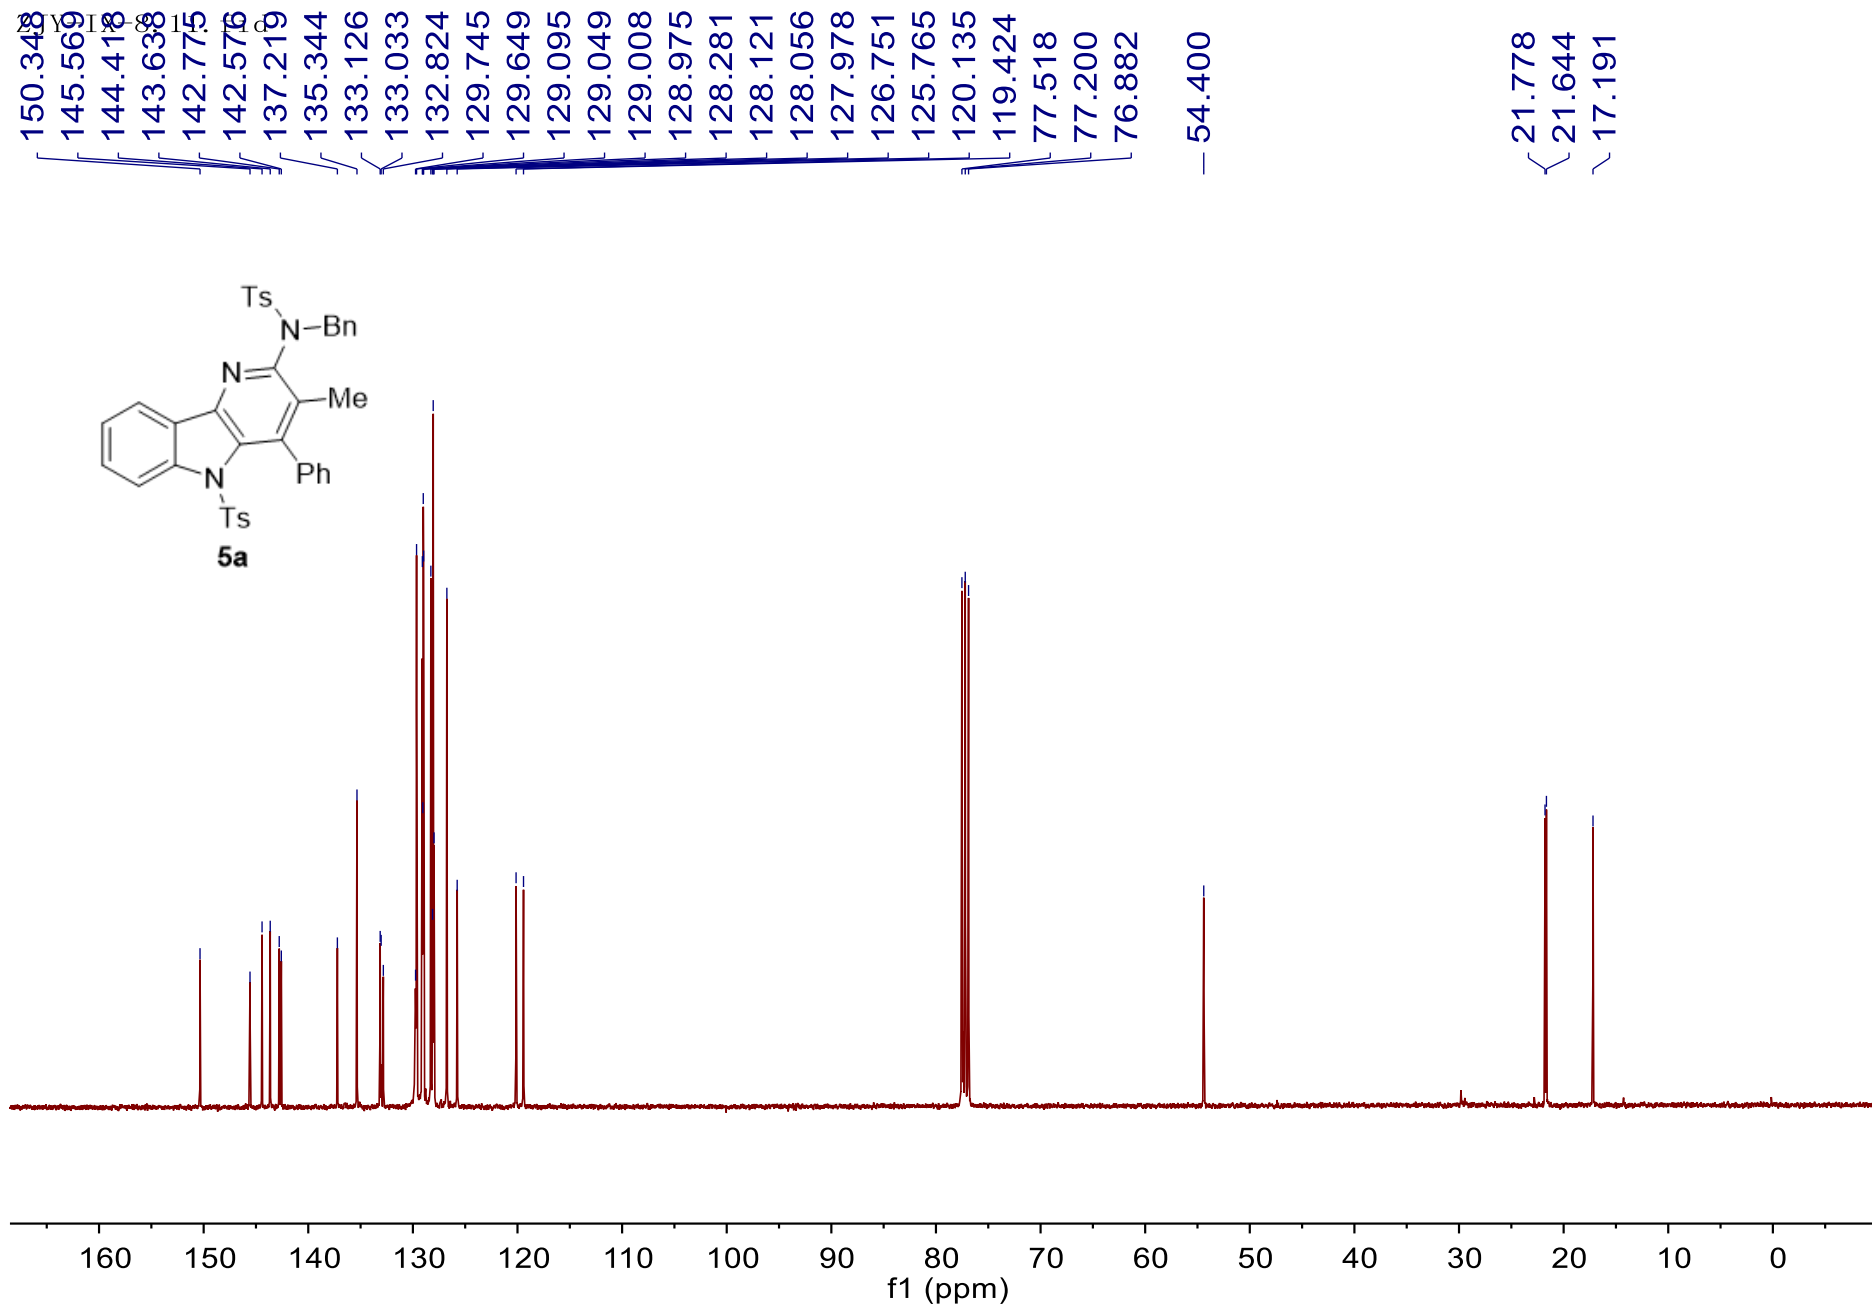

ZJY-IX-11-10.fid

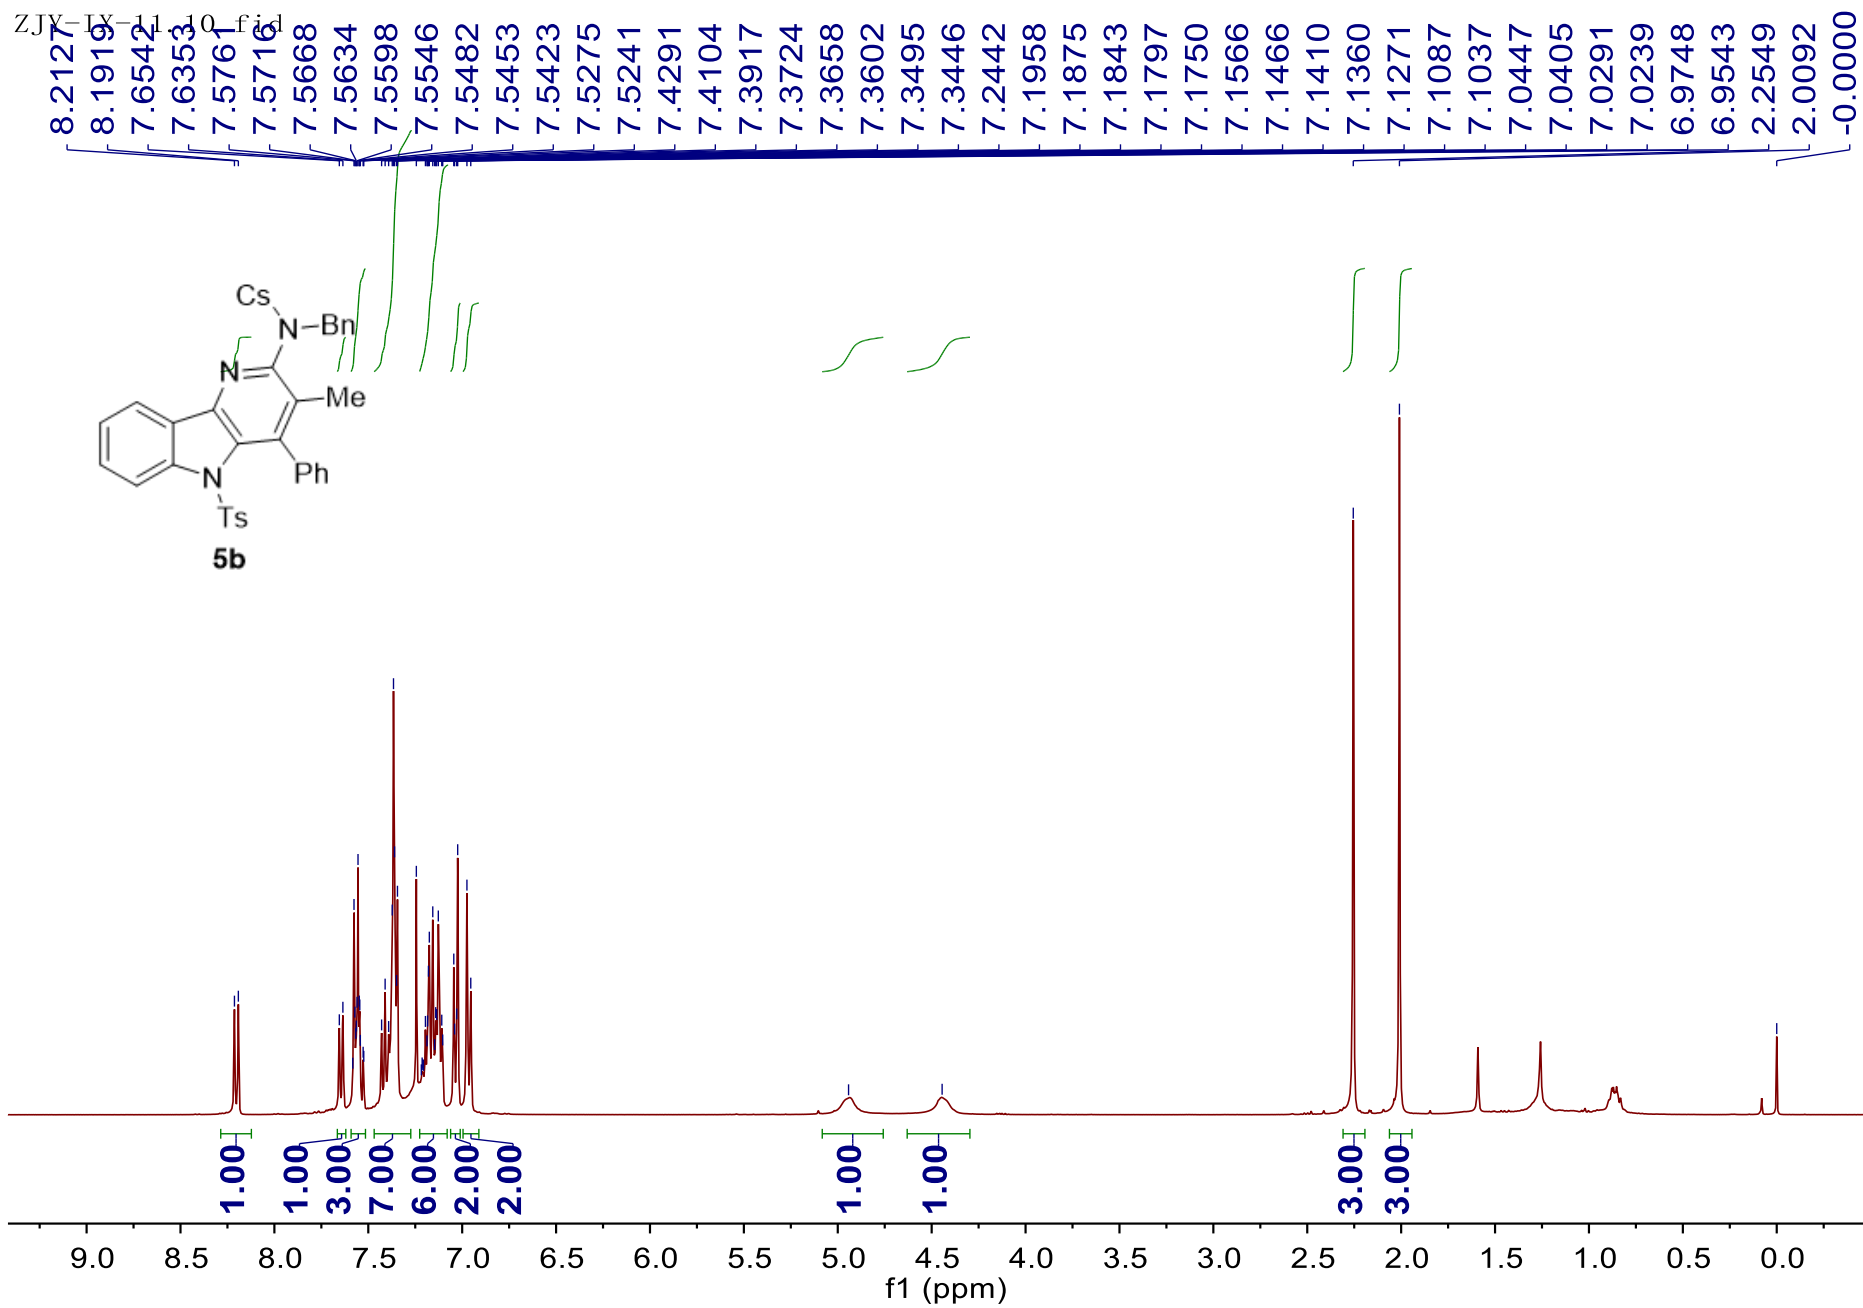



149.957  
145.661  
144.478  
142.826  
142.762  
139.407  
137.092  
136.849  
134.907  
133.294  
133.060  
132.973  
130.386  
129.721  
129.258  
129.050  
128.740  
128.382  
128.186  
128.161  
128.110  
127.878  
126.775  
125.945  
120.131  
119.445  
77.518  
77.200  
76.883  
54.722

21.675  
17.068

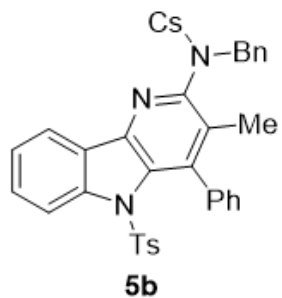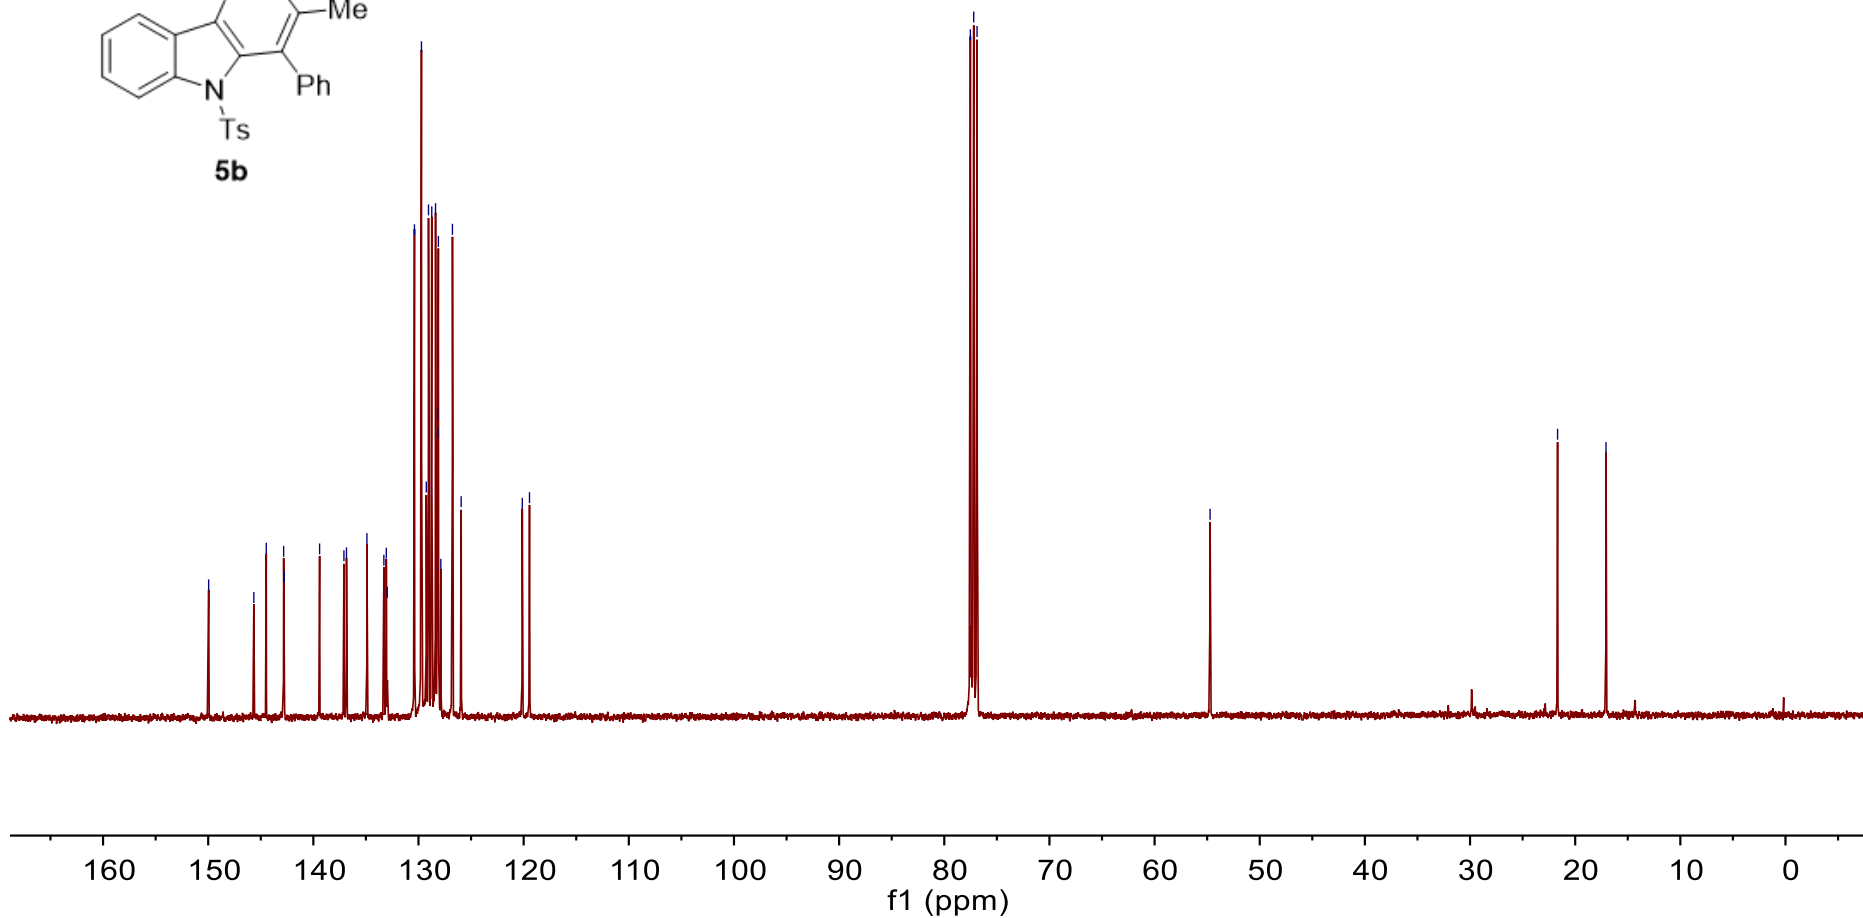

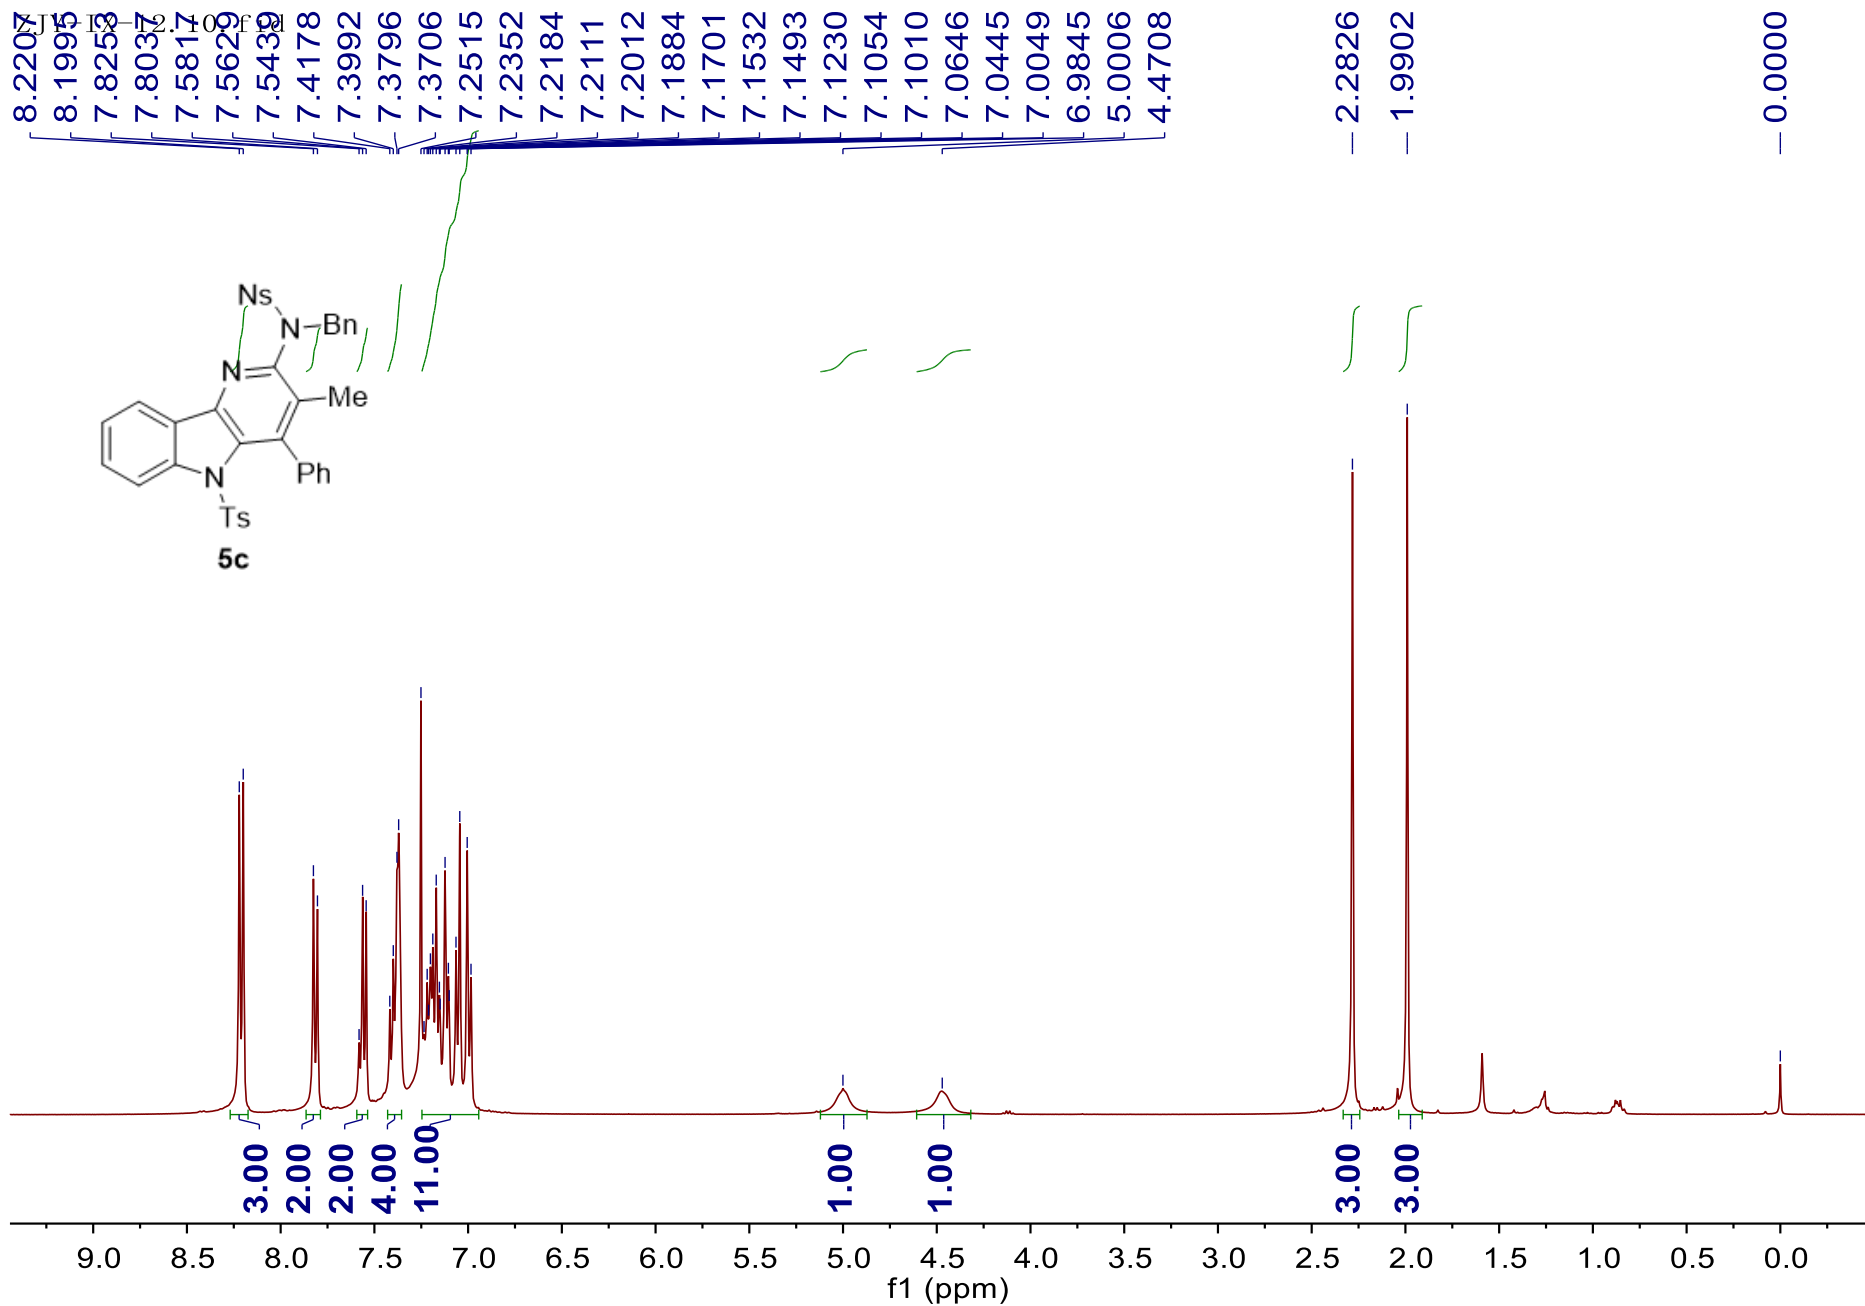

ZJY-EX-2211-1f1d

150.241  
149.394  
145.755  
144.602  
144.234  
143.015  
142.856  
136.939  
134.395  
133.446  
133.131  
133.035  
130.153  
129.776  
129.676  
129.514  
129.117  
128.490  
128.434  
128.274  
128.163  
127.536  
126.780  
126.073  
123.616  
119.952  
119.452  
77.518  
77.200  
76.883  
55.047

- 21.690  
- 17.013

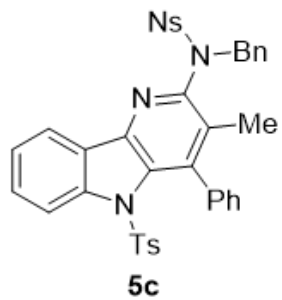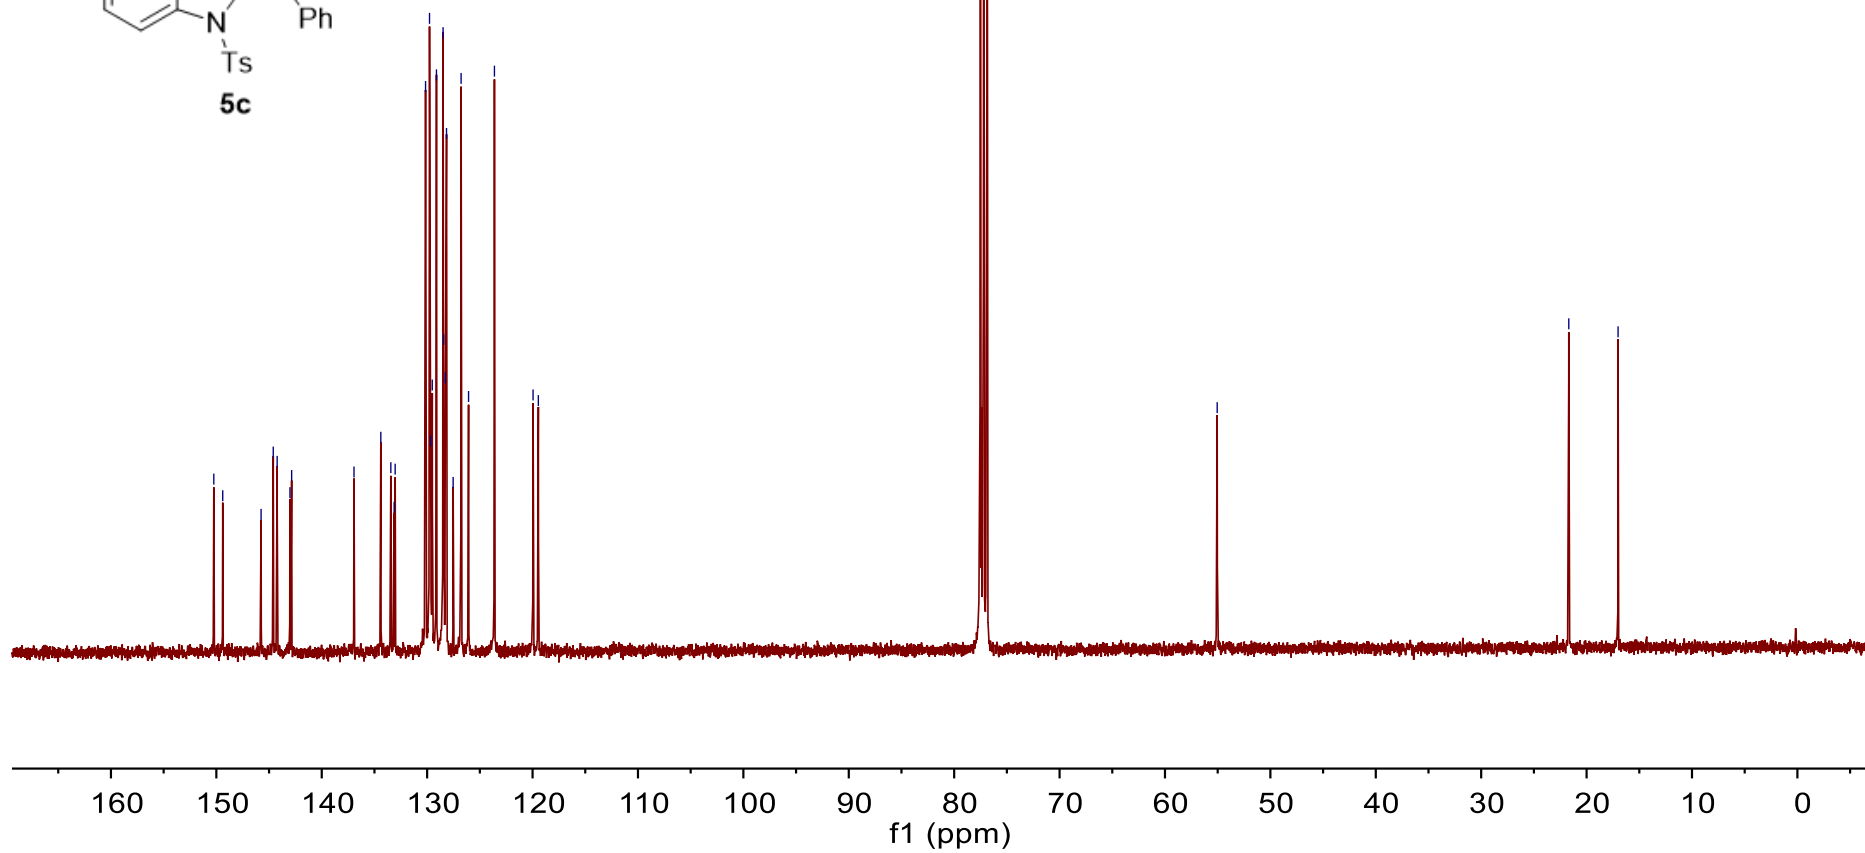

S126

ZJY-IX-10-10.fid

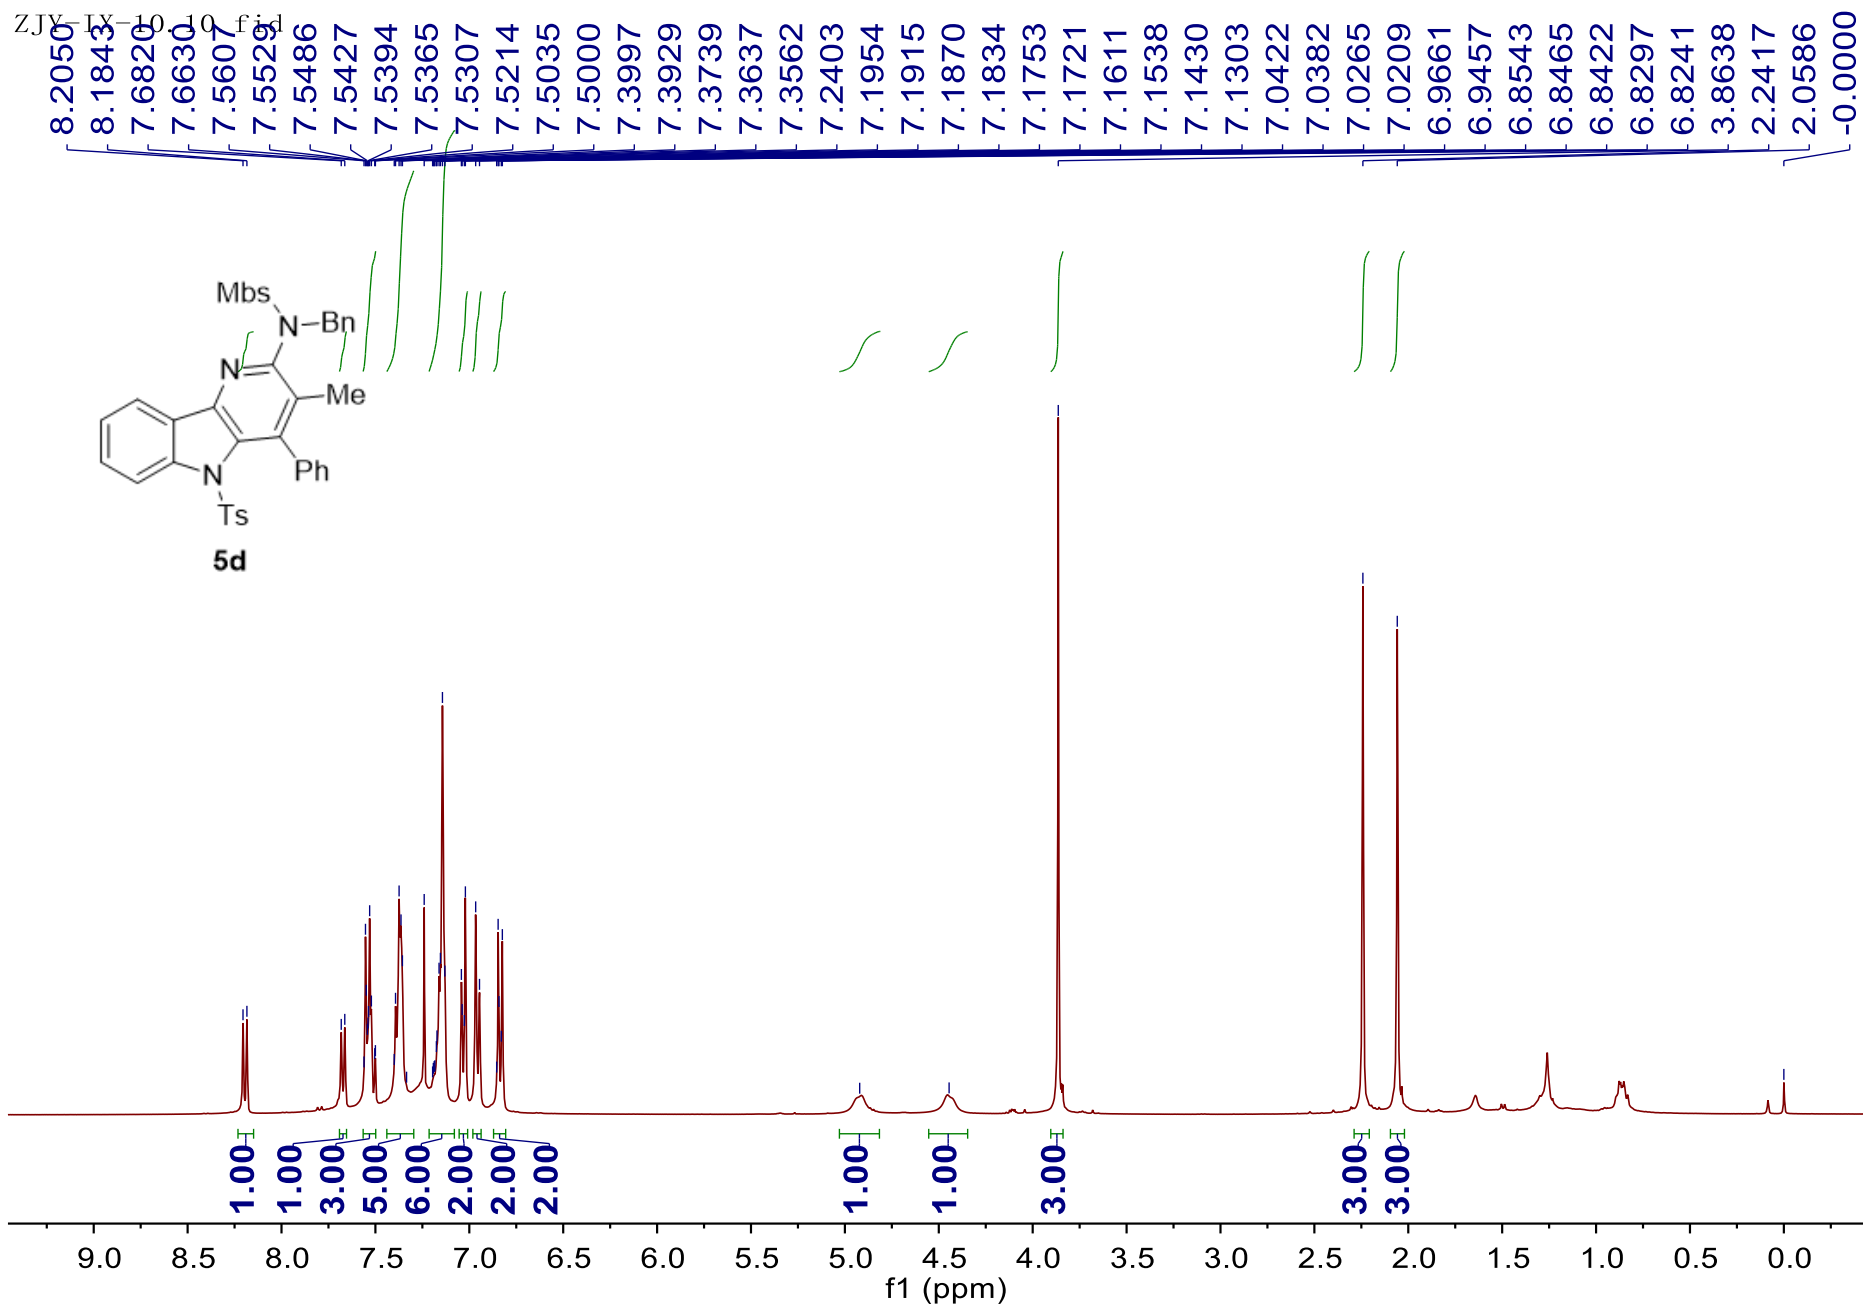

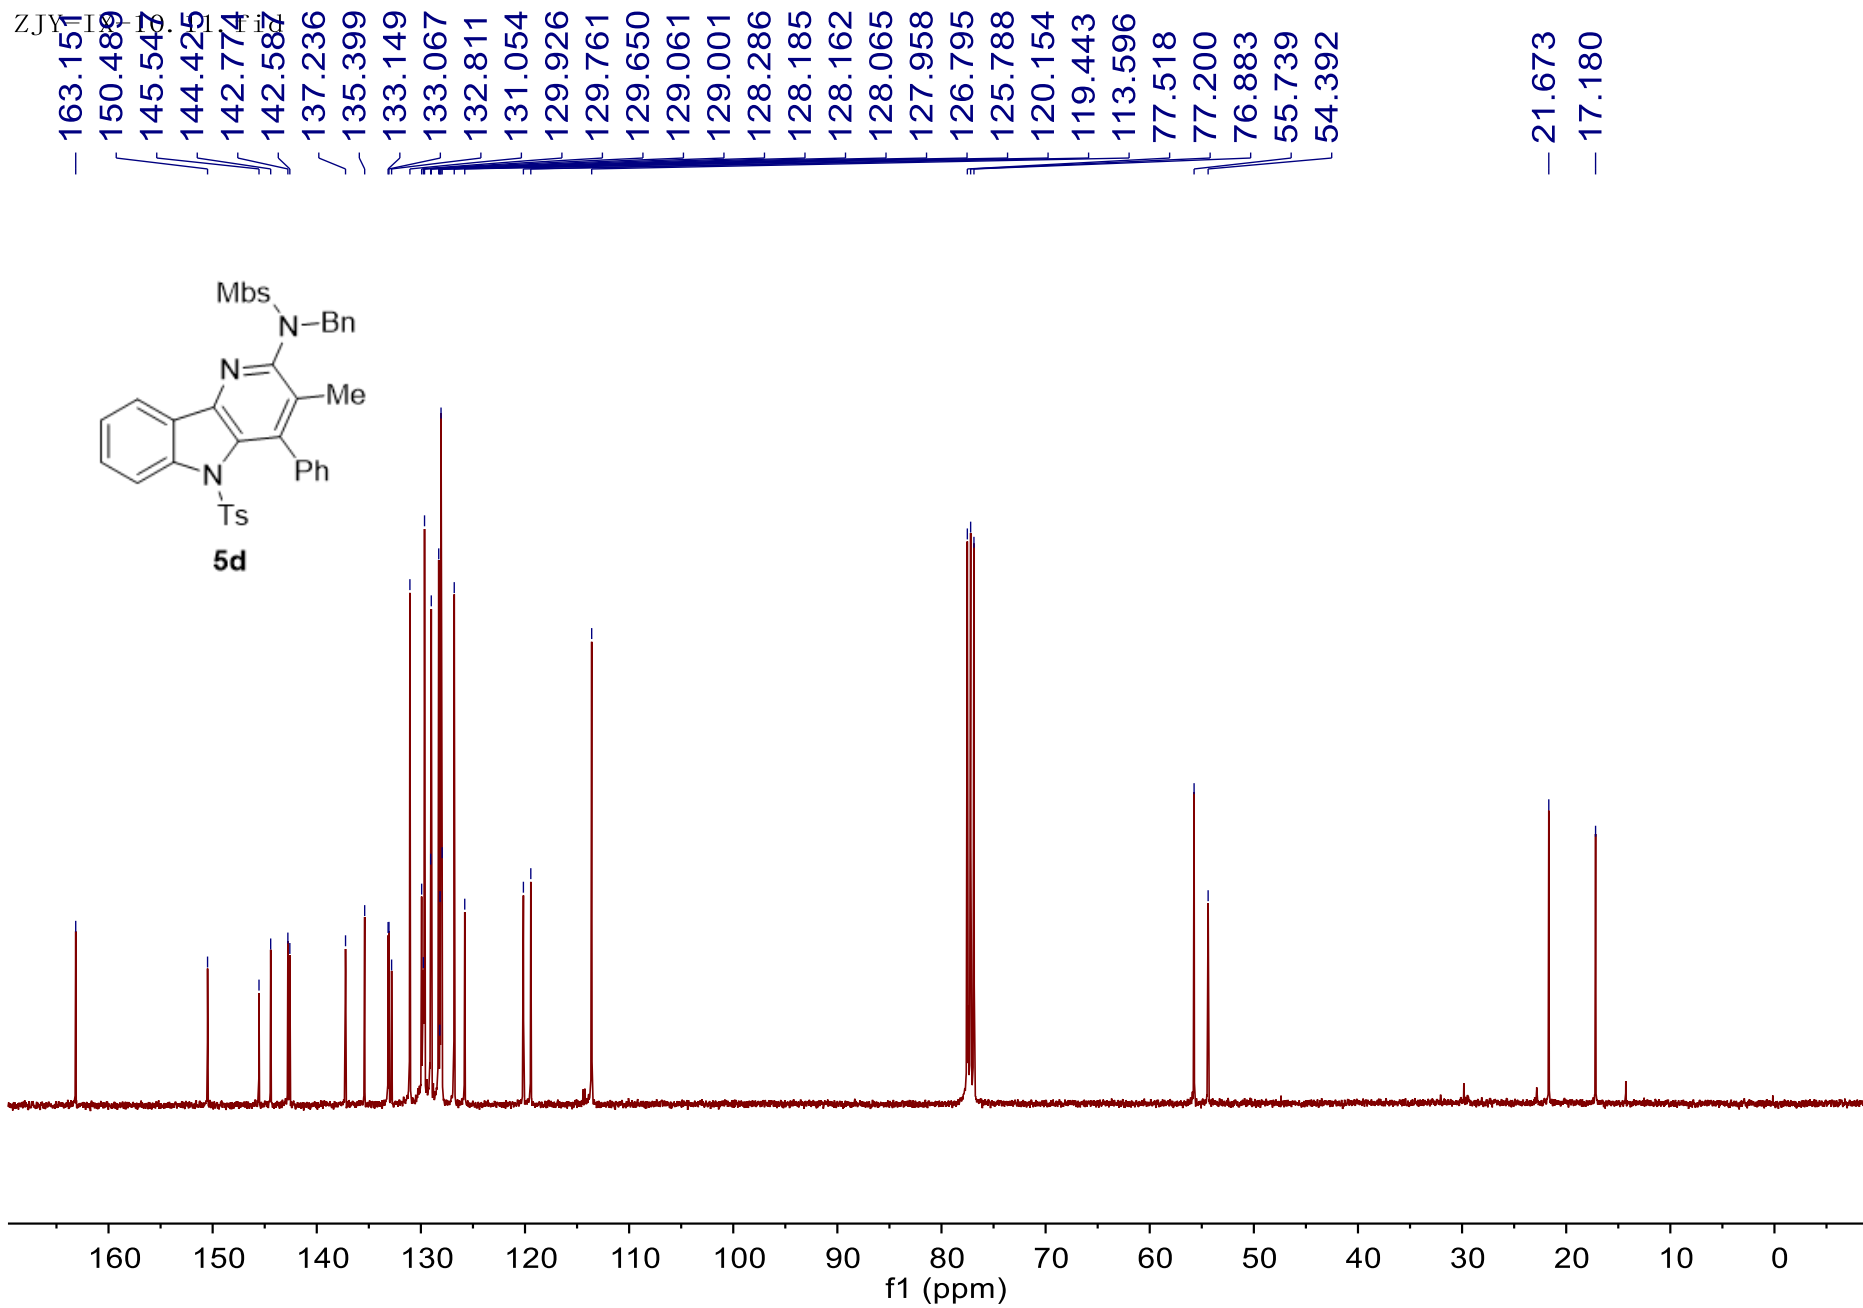

ZJY-IX-15pure/10

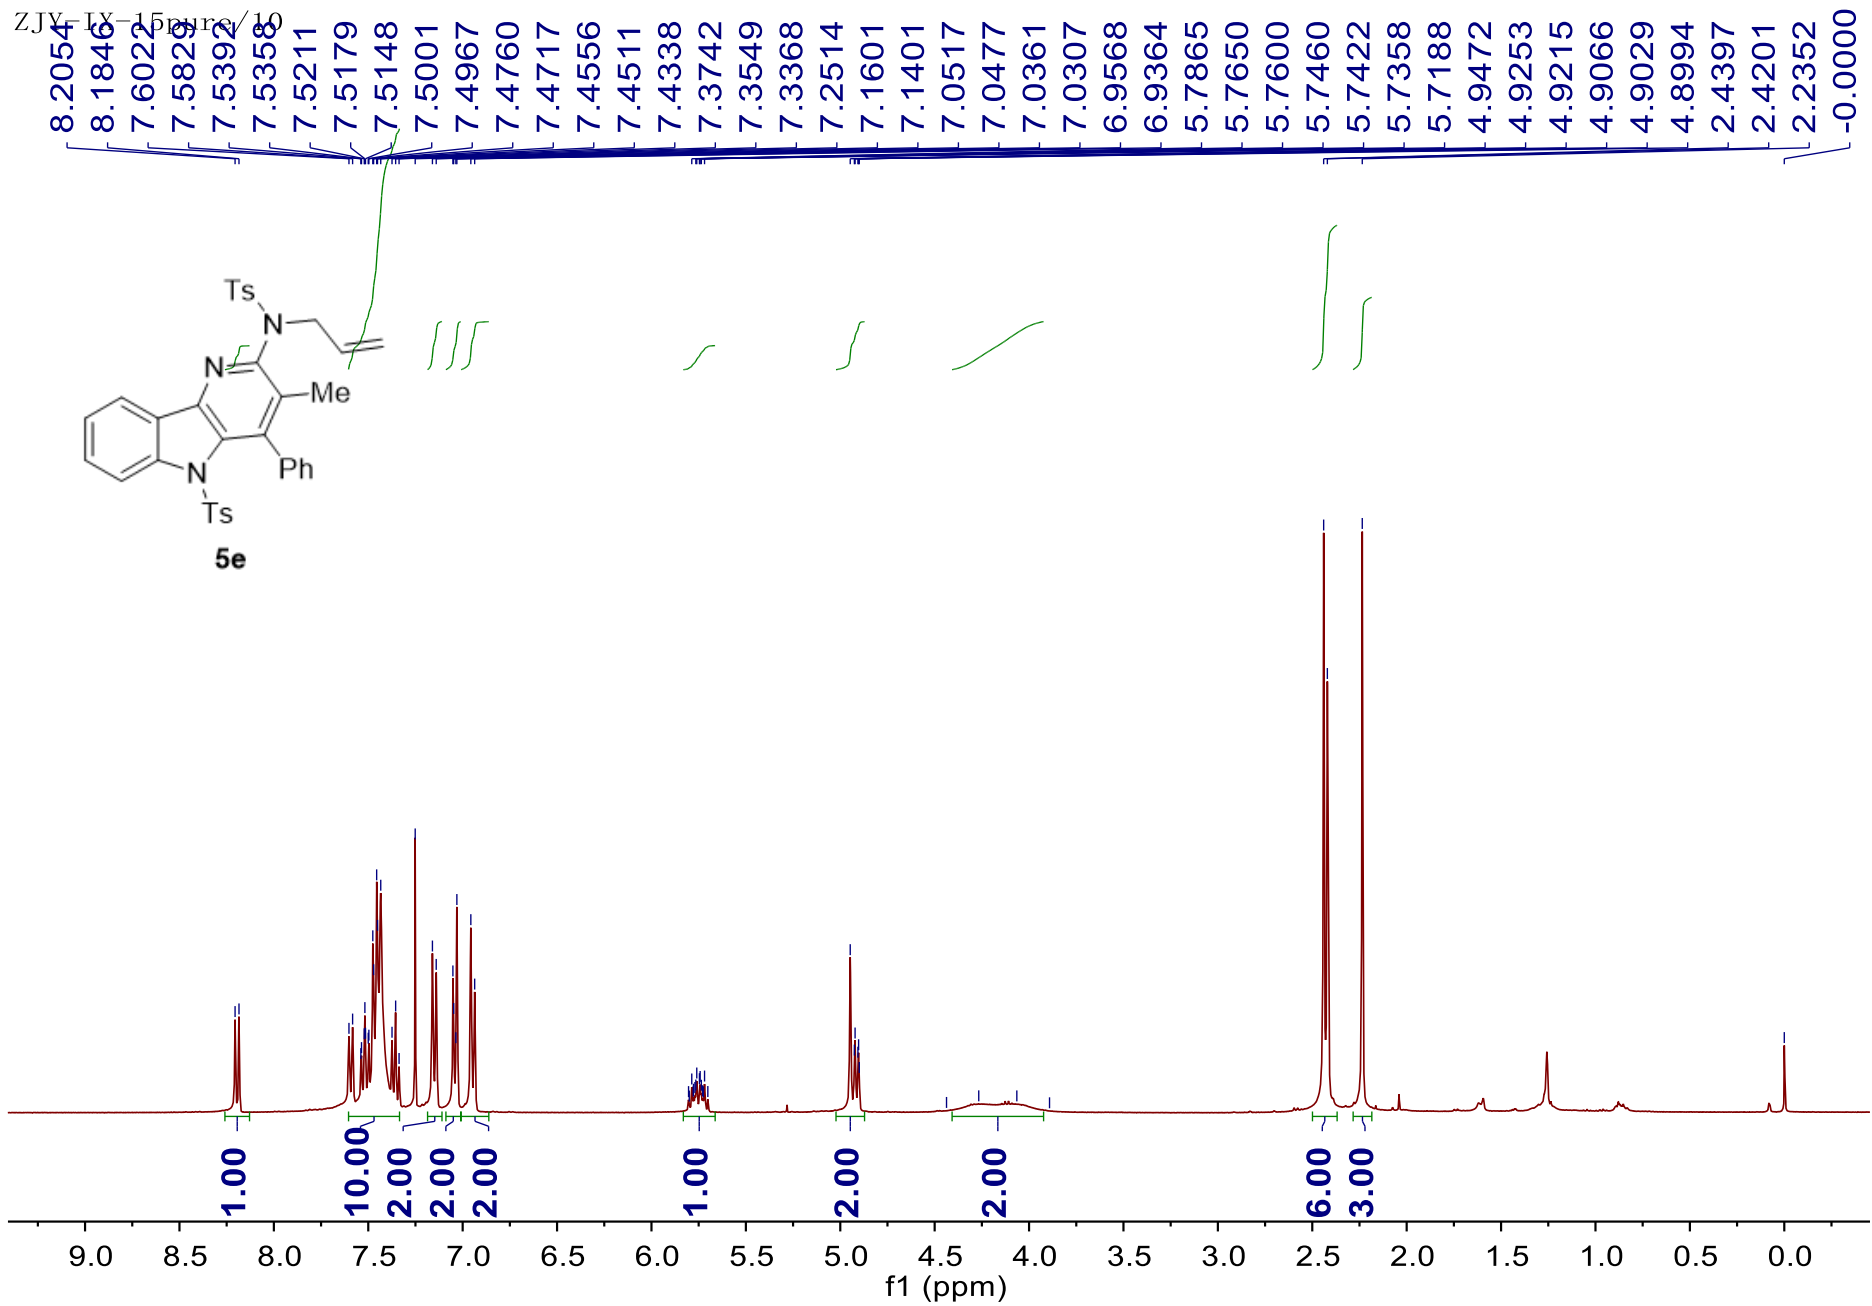

Zy-X1 source

150.599  
145.611  
144.401  
143.584  
142.856  
142.732  
137.339  
135.200  
133.165  
132.875  
132.681  
132.215  
129.951  
129.043  
129.037  
129.028  
129.007  
128.201  
128.191  
126.791  
125.758  
125.745  
120.162  
119.766  
119.490  
77.517  
77.200  
76.881

— 53.390

{ 21.790  
21.661  
17.549

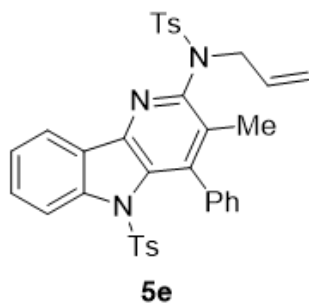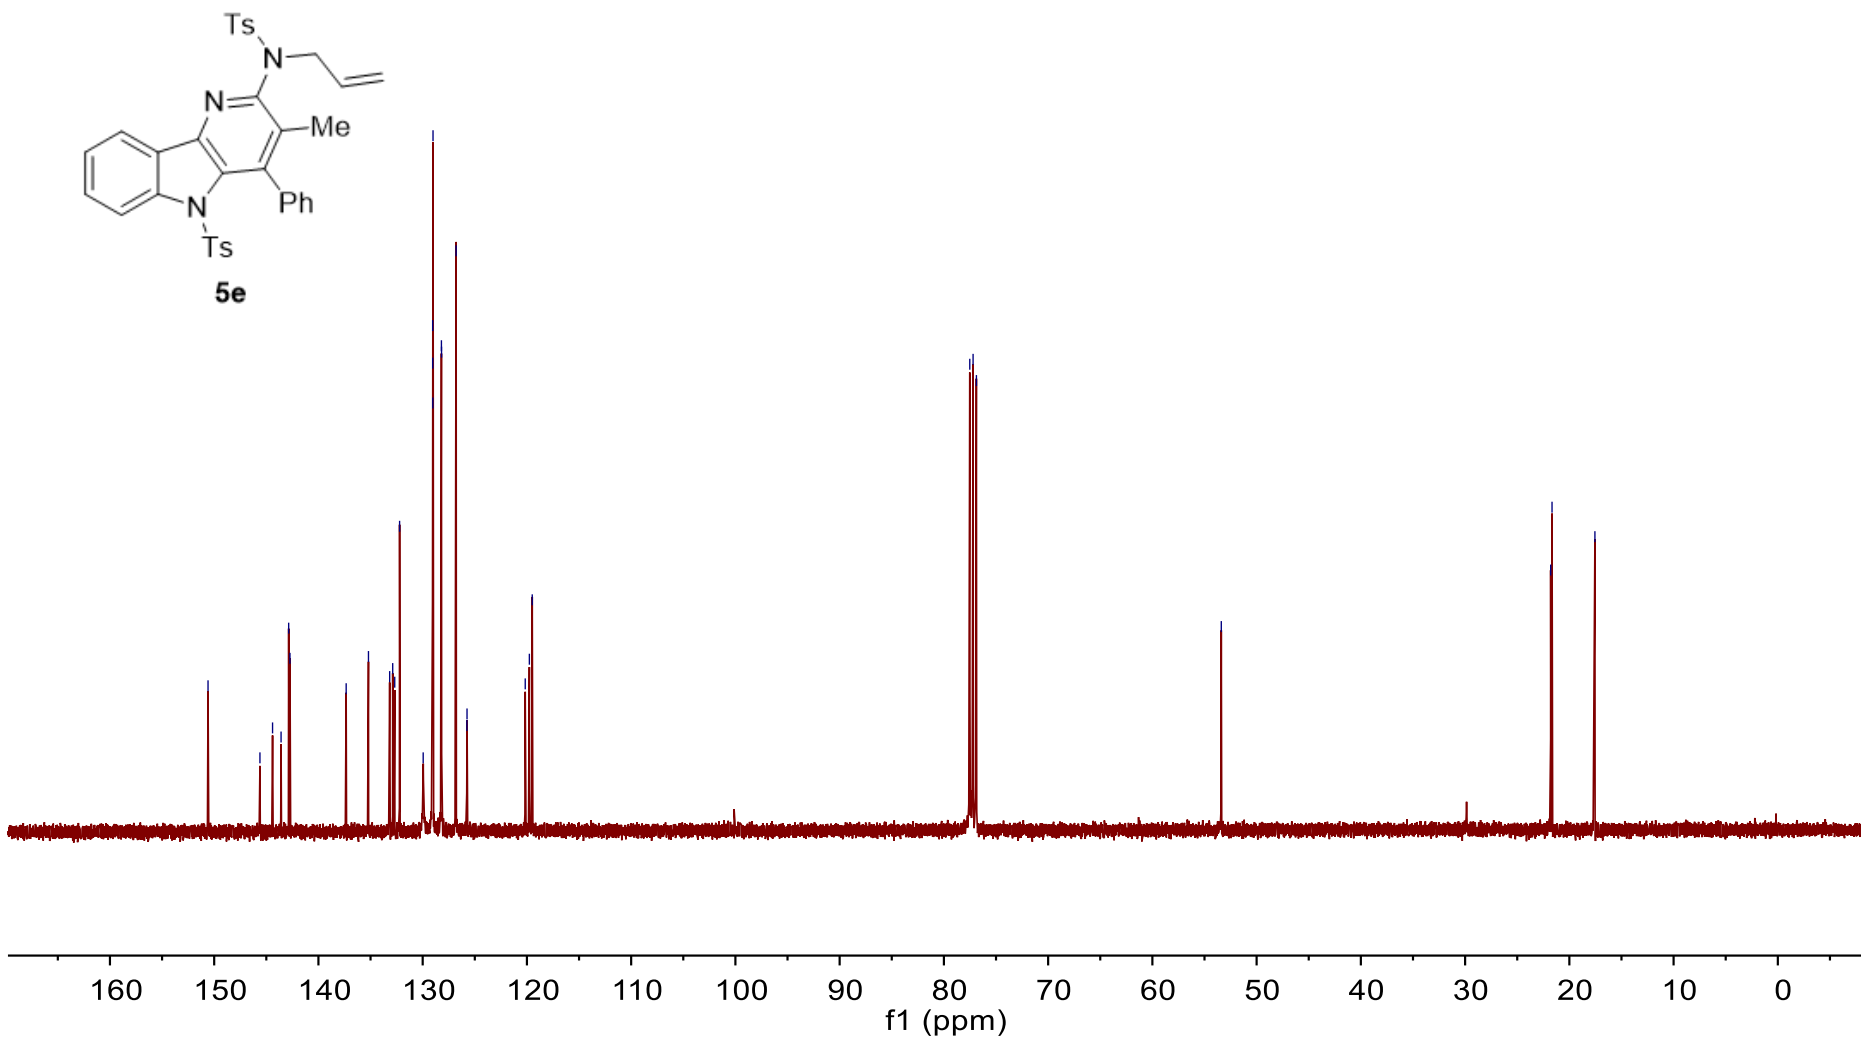

S130

ZJY-IX-18-10113

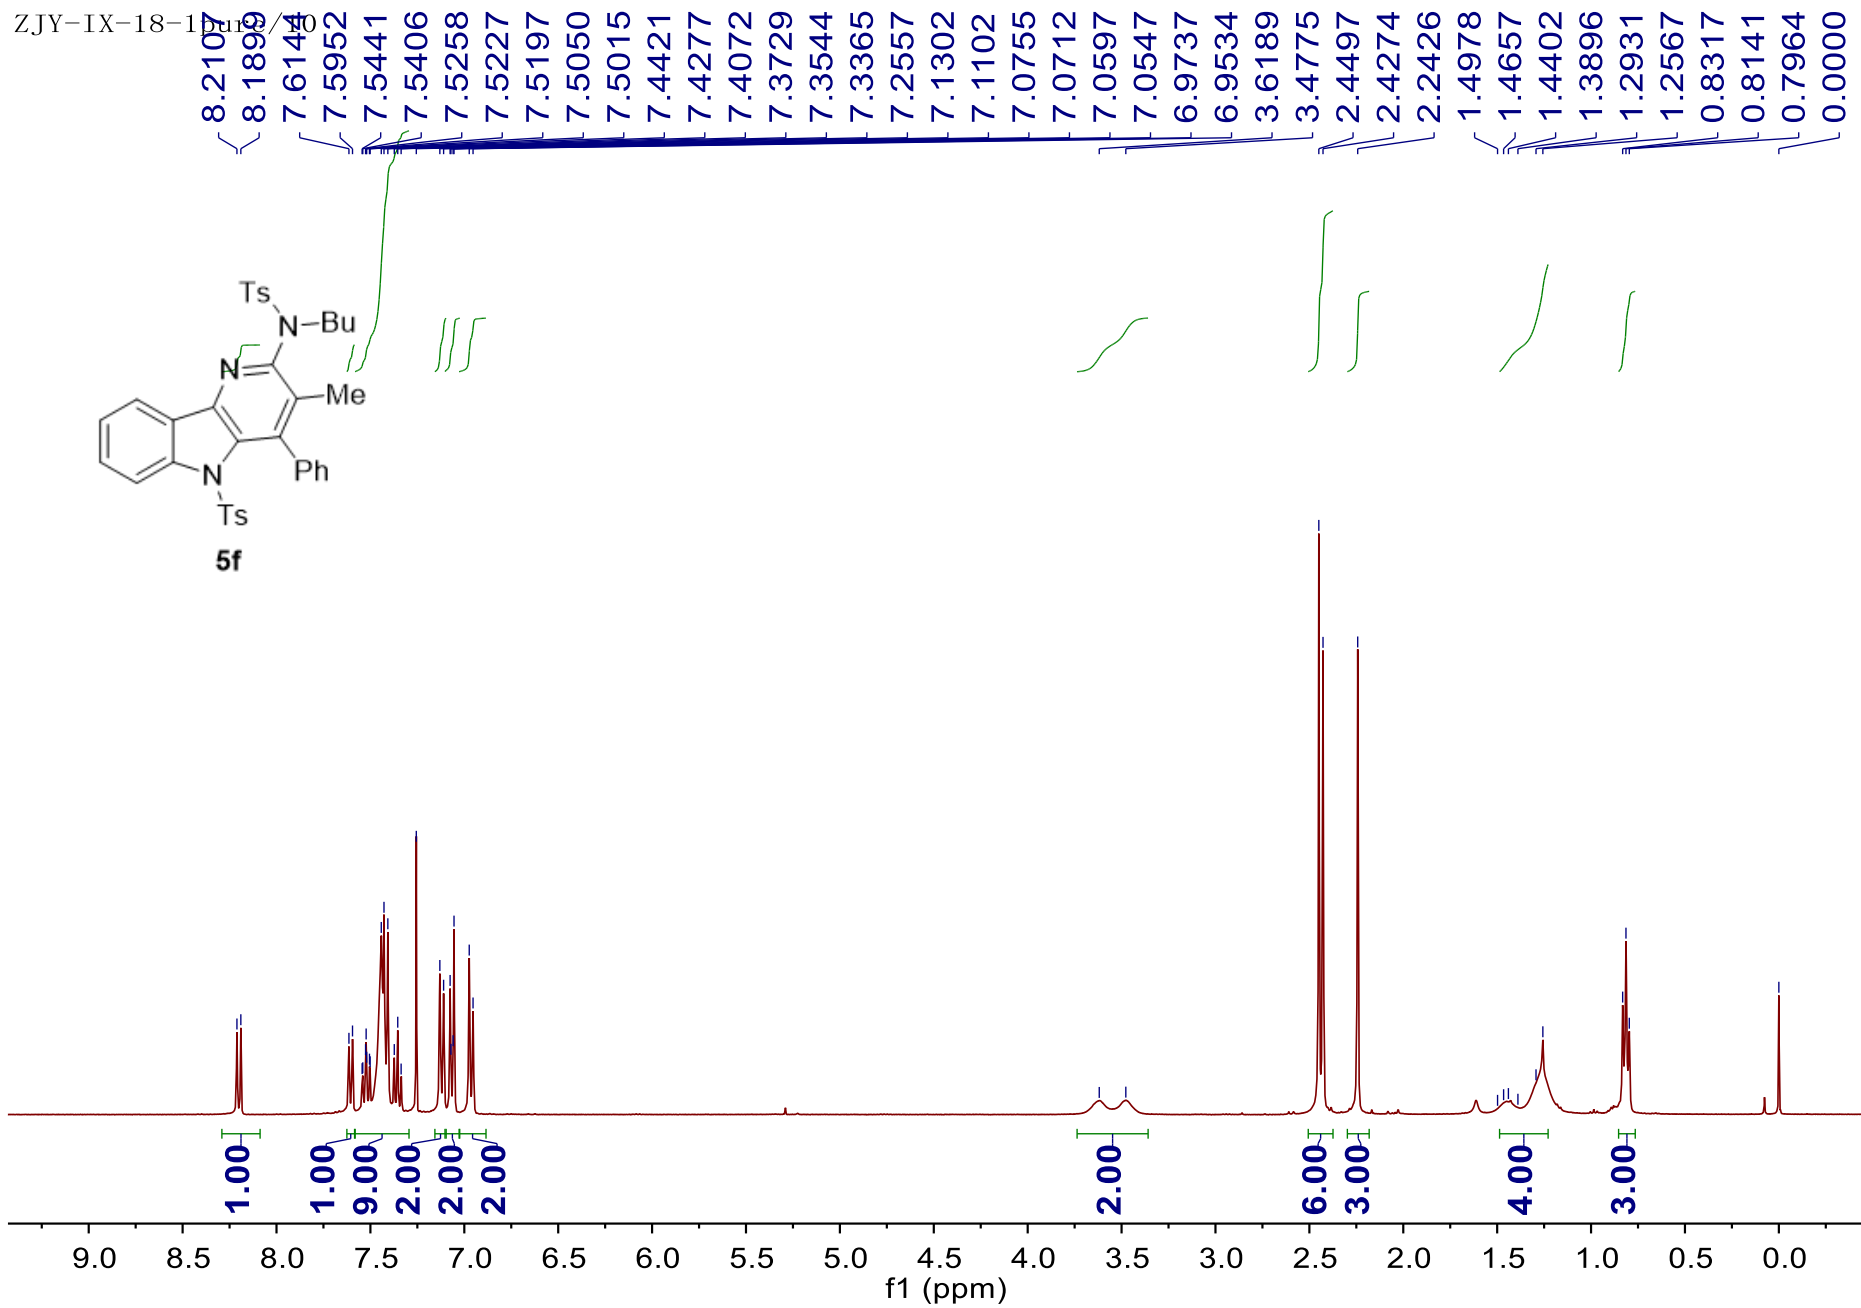



150.816  
145.656  
144.426  
143.387  
142.882  
142.708  
137.774  
135.211  
133.206  
132.855  
132.824  
129.064  
128.958  
128.917  
128.225  
128.215  
128.194  
126.828  
125.739  
120.196  
119.497  
77.518  
77.200  
76.882  
50.207  
30.191  
21.788  
21.678  
20.270  
17.717  
13.862

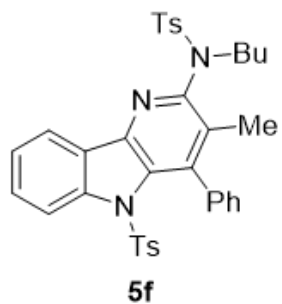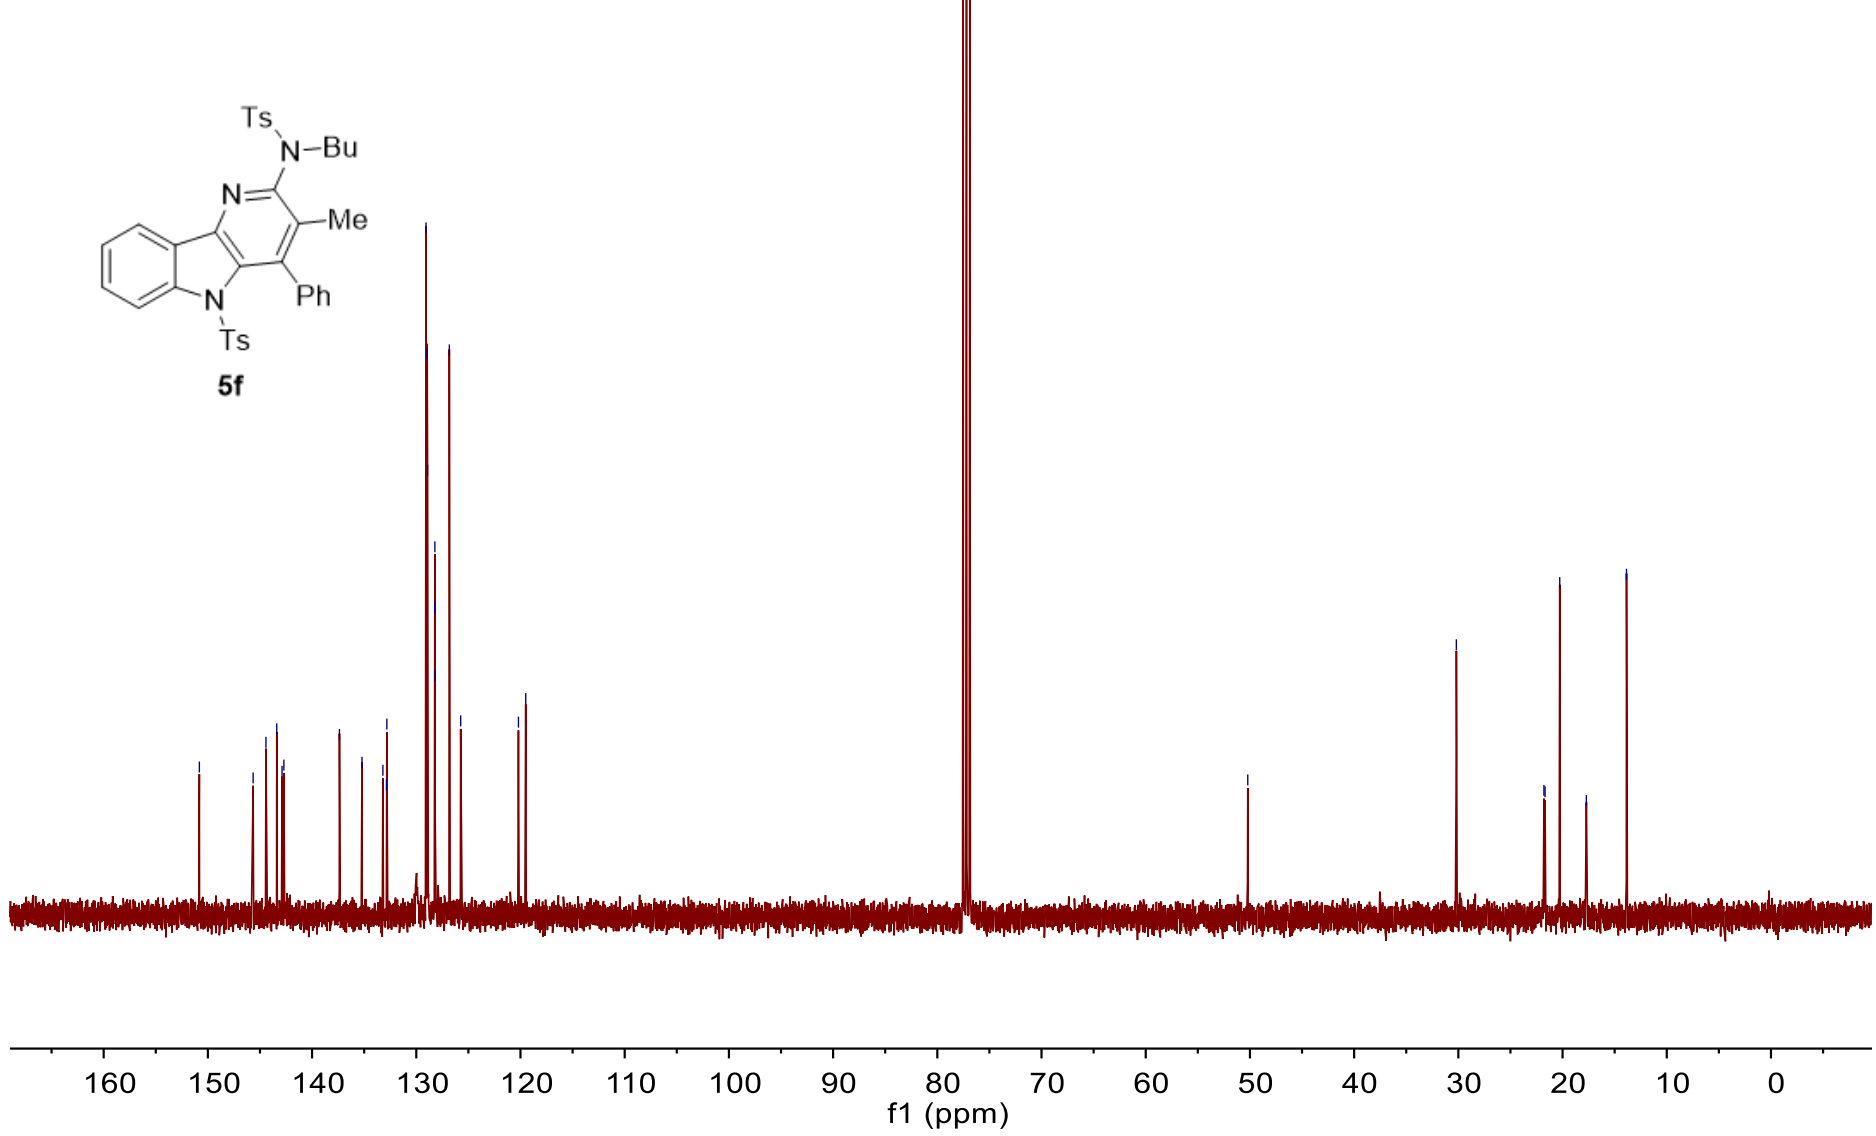

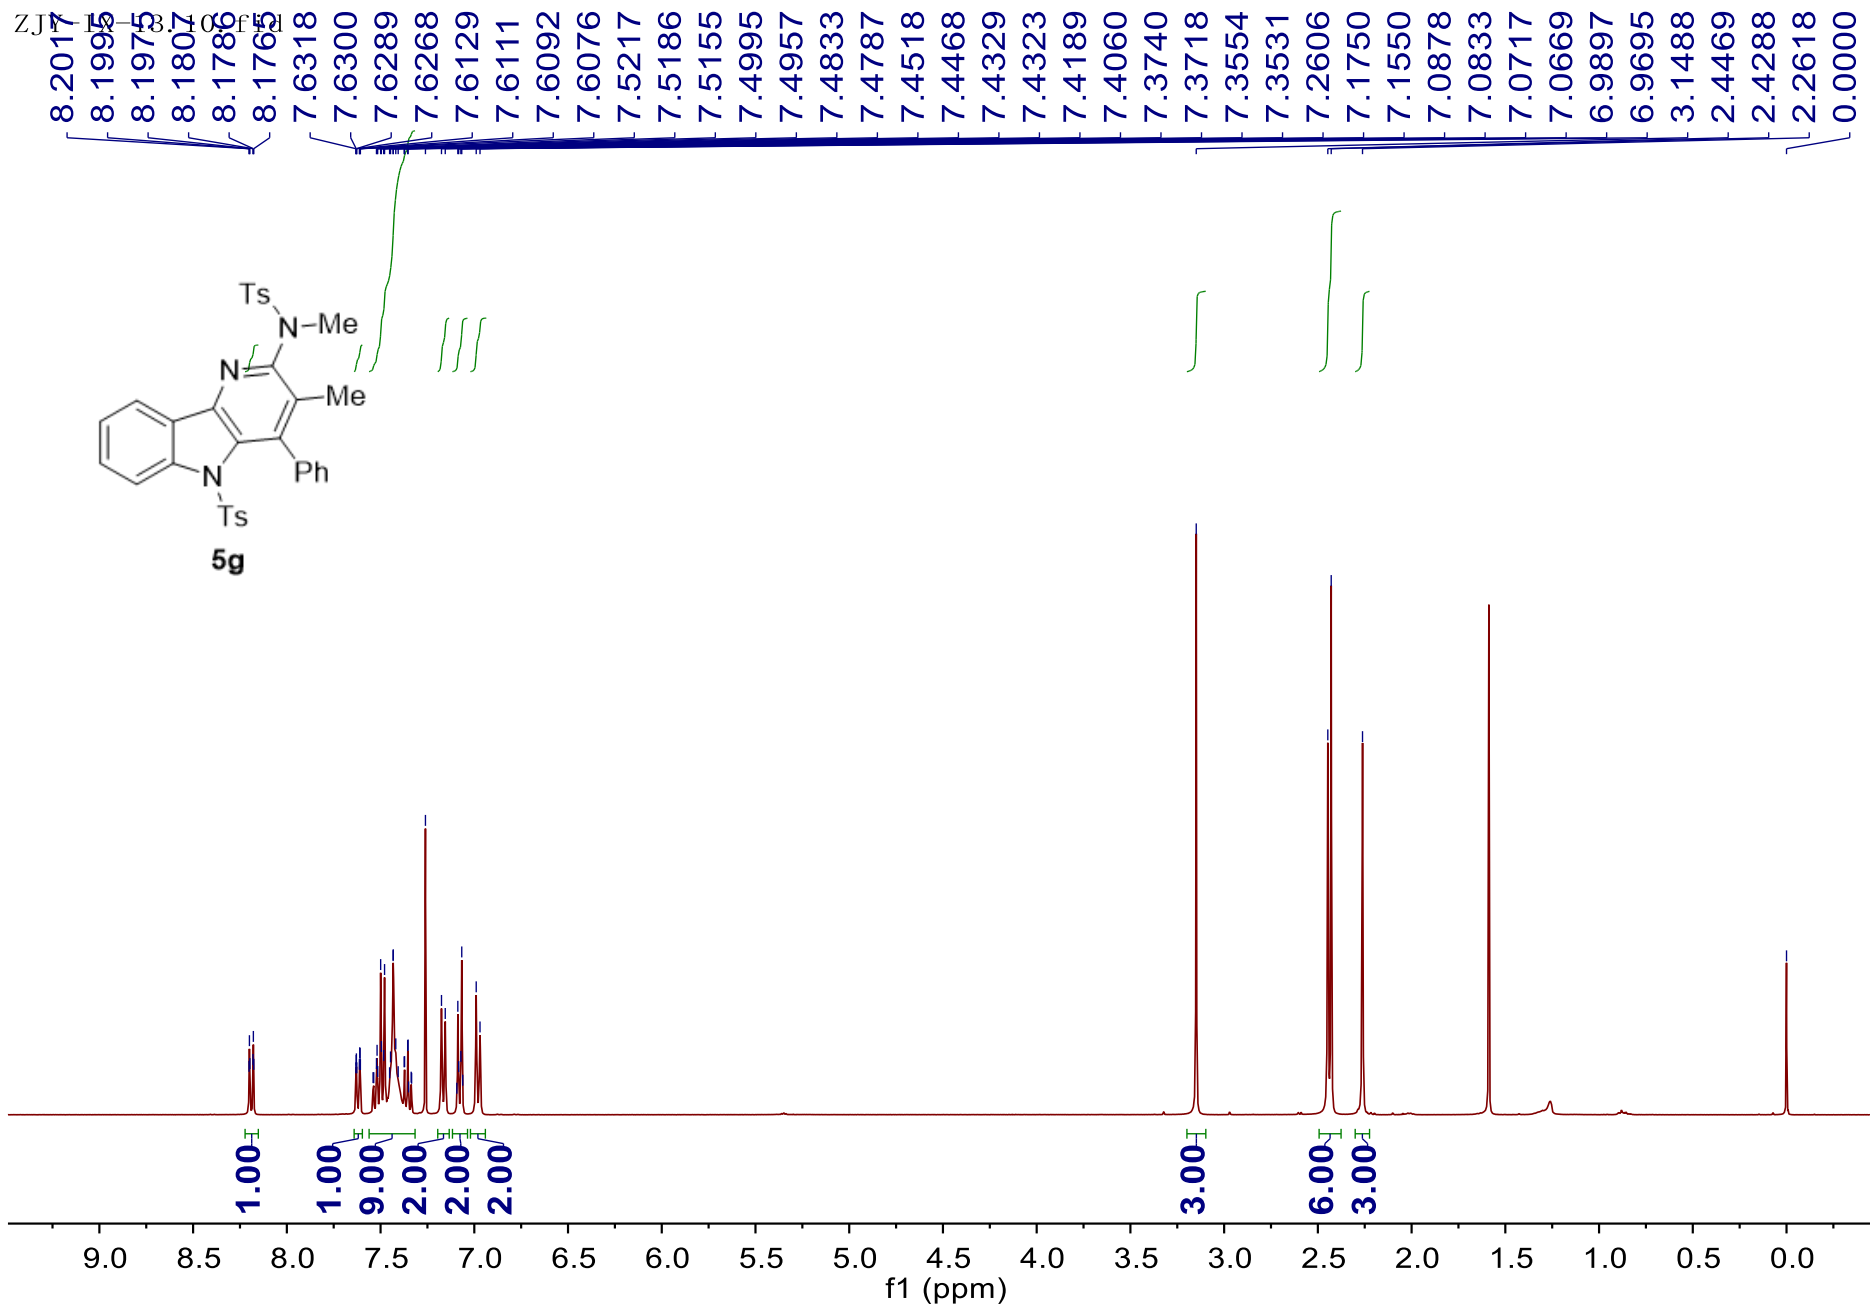

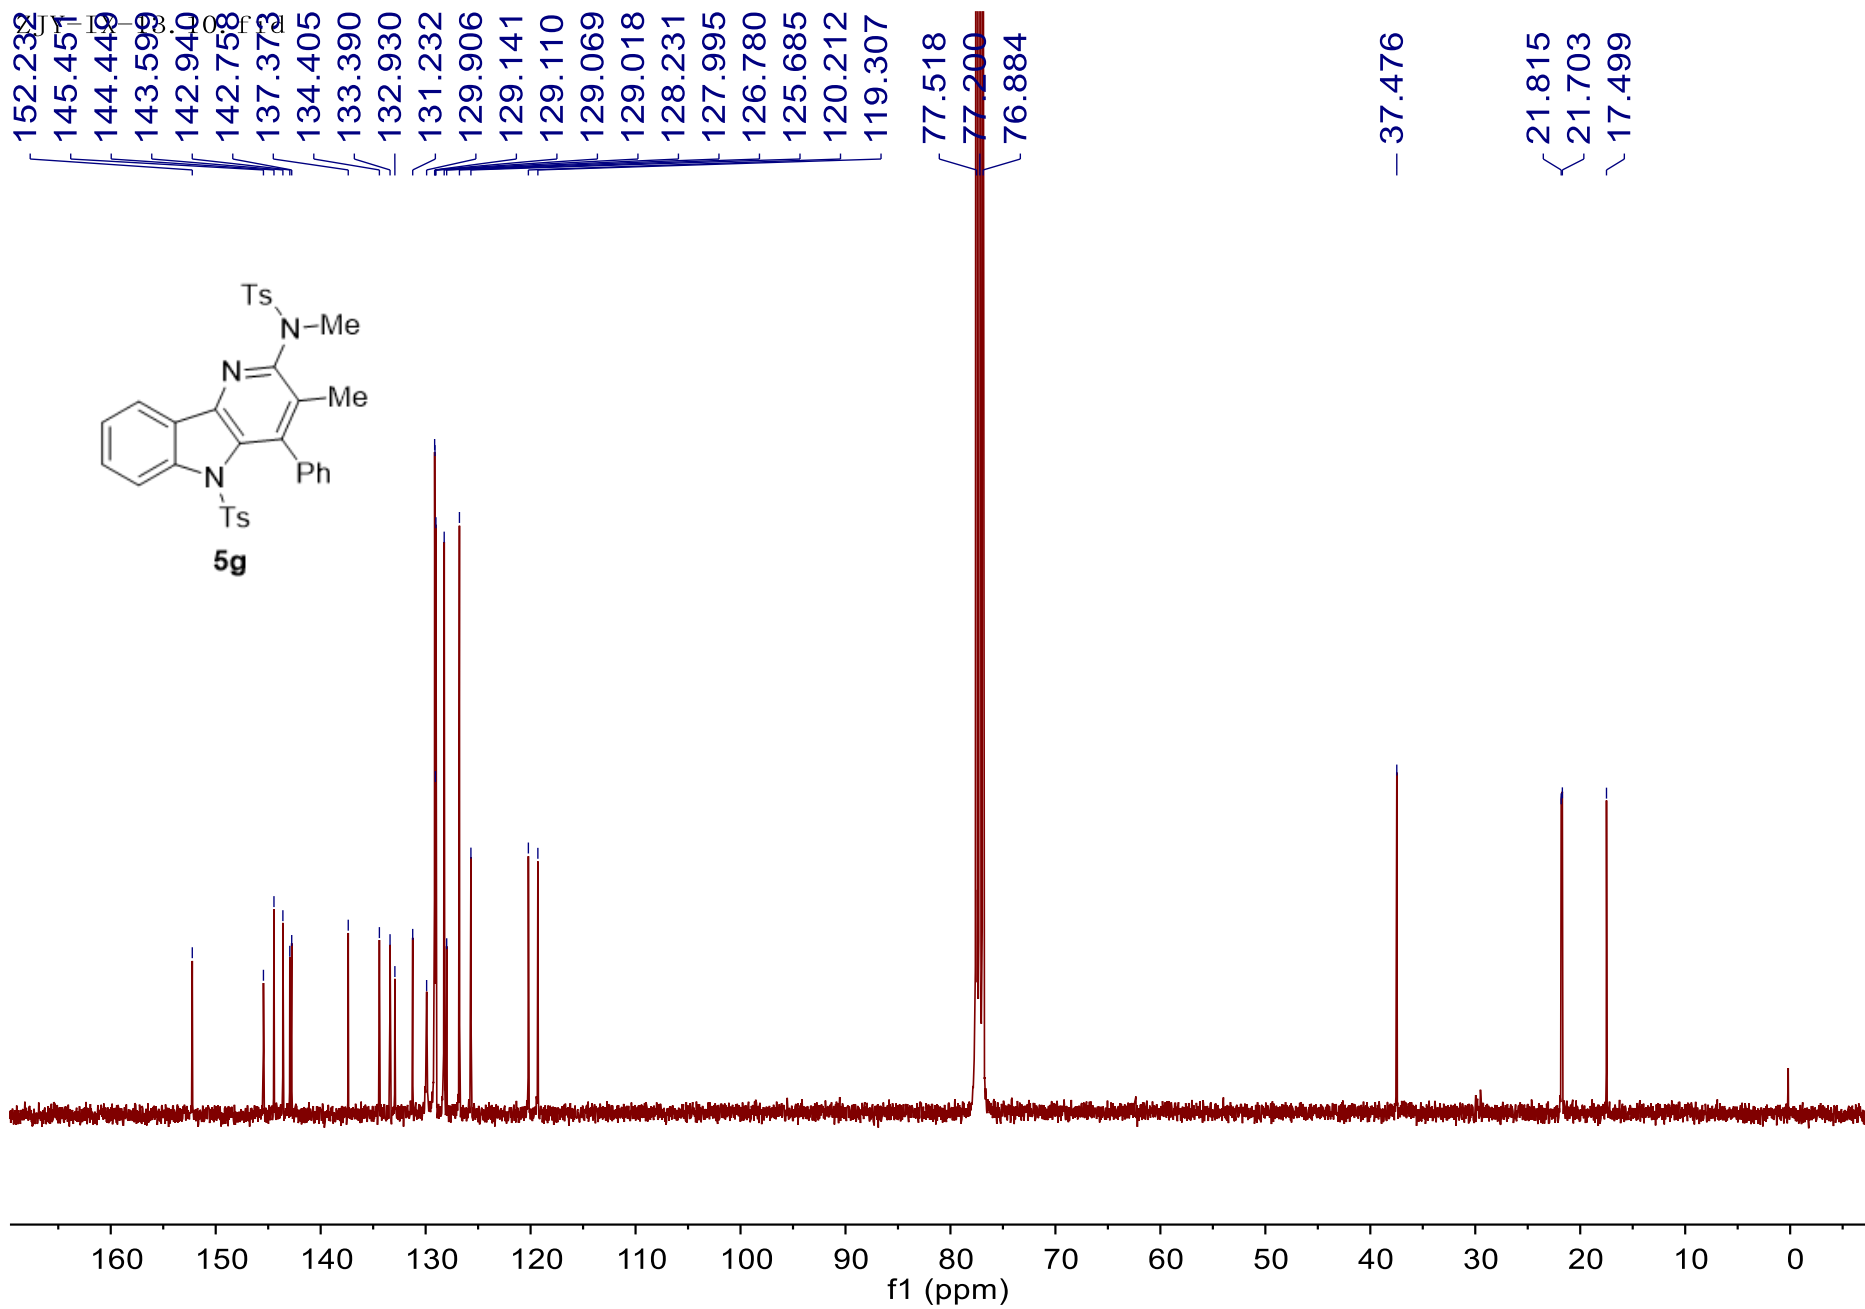

S134

ZJY-LX-28-10.fid

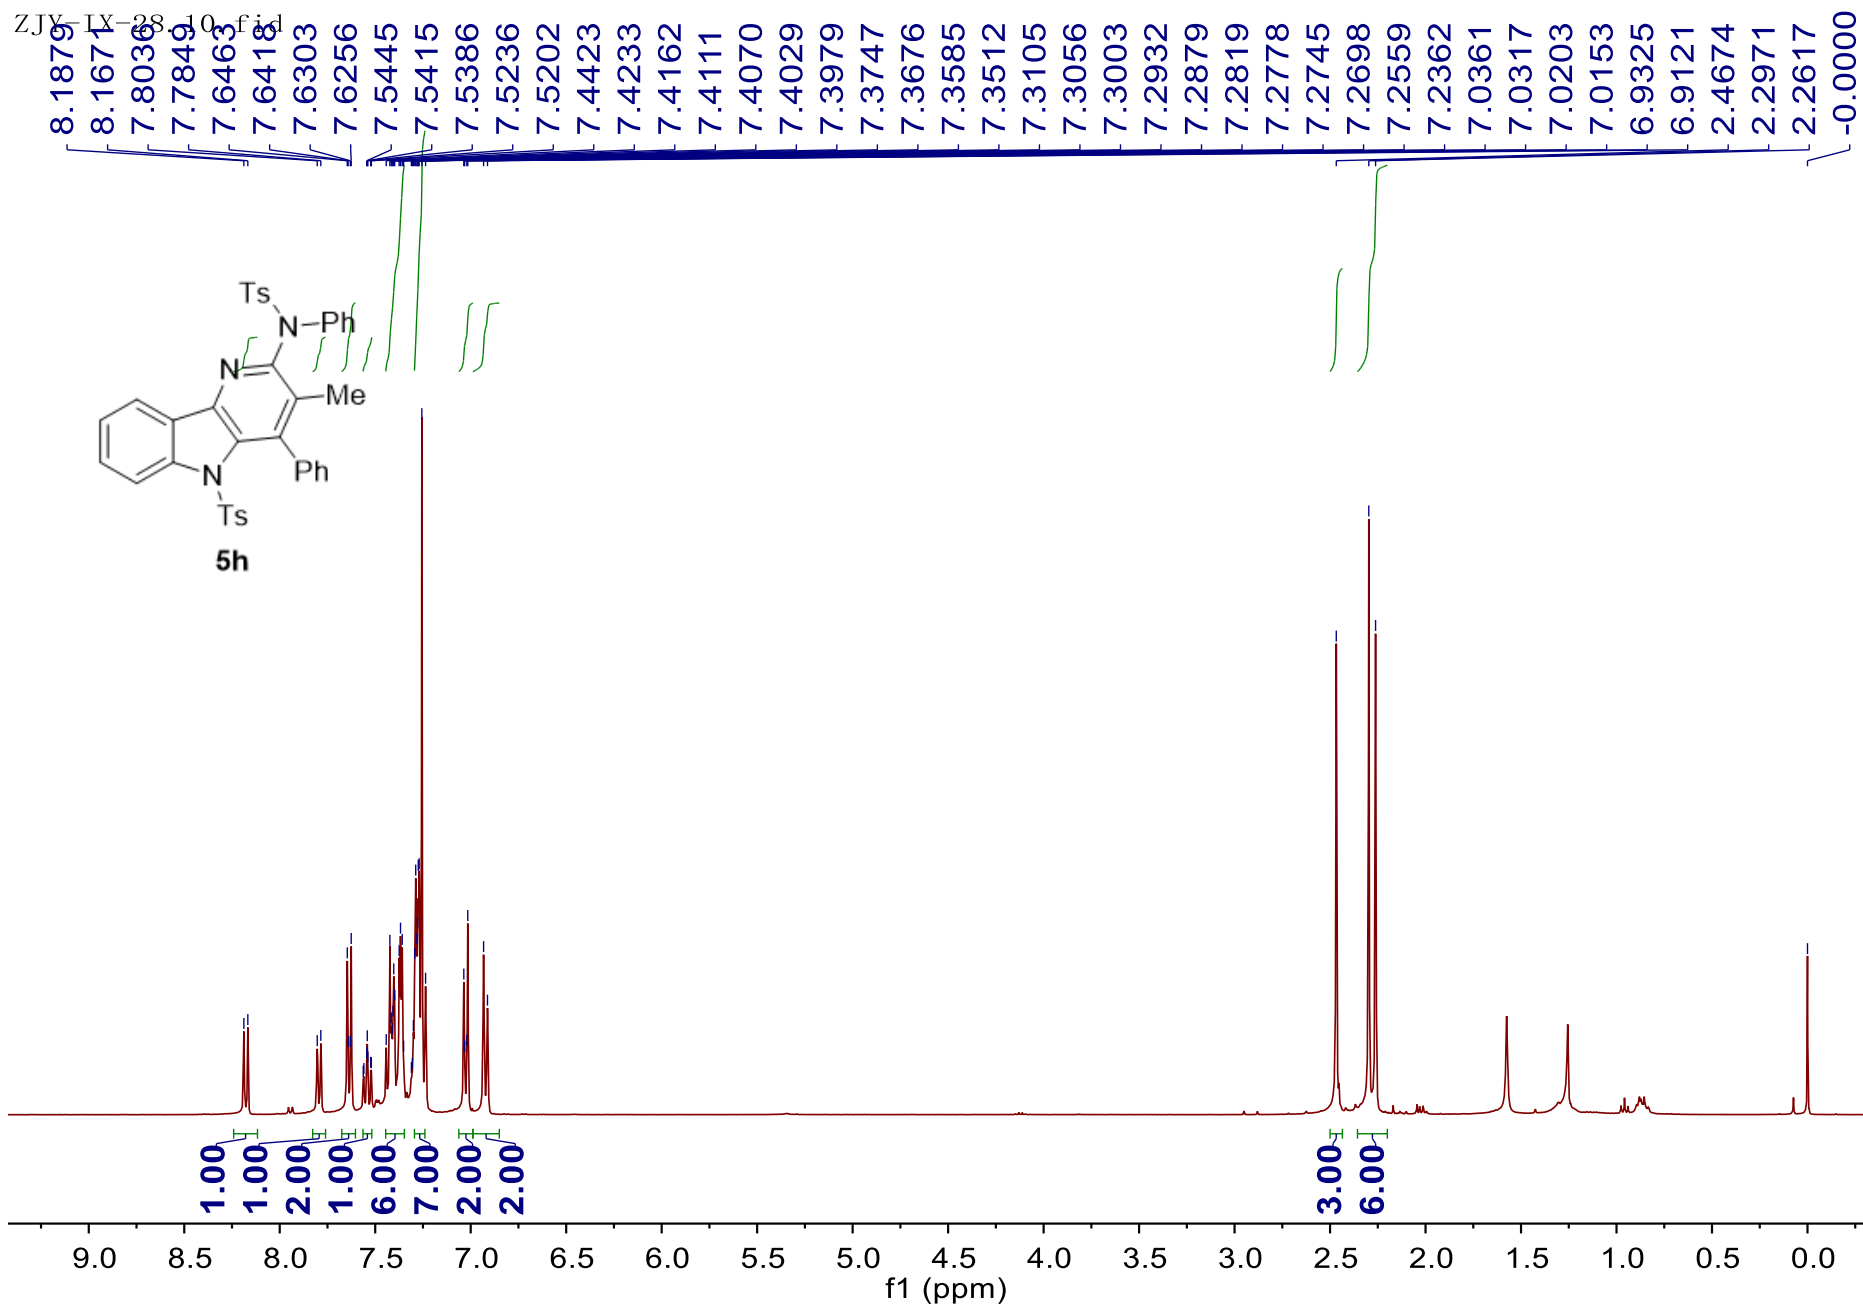

151.677  
145.385  
144.414  
143.569  
143.185  
142.759  
139.647  
137.124  
136.793  
133.715  
132.927  
130.723  
129.880  
129.454  
129.170  
129.150  
129.054  
128.834  
128.352  
128.192  
128.102  
128.018  
127.585  
126.579  
125.627  
120.483  
119.134  
77.518  
77.200  
76.883

21.871  
21.696  
16.571

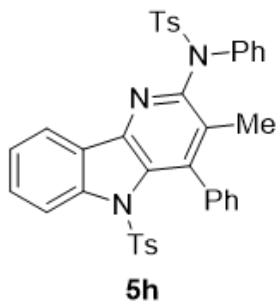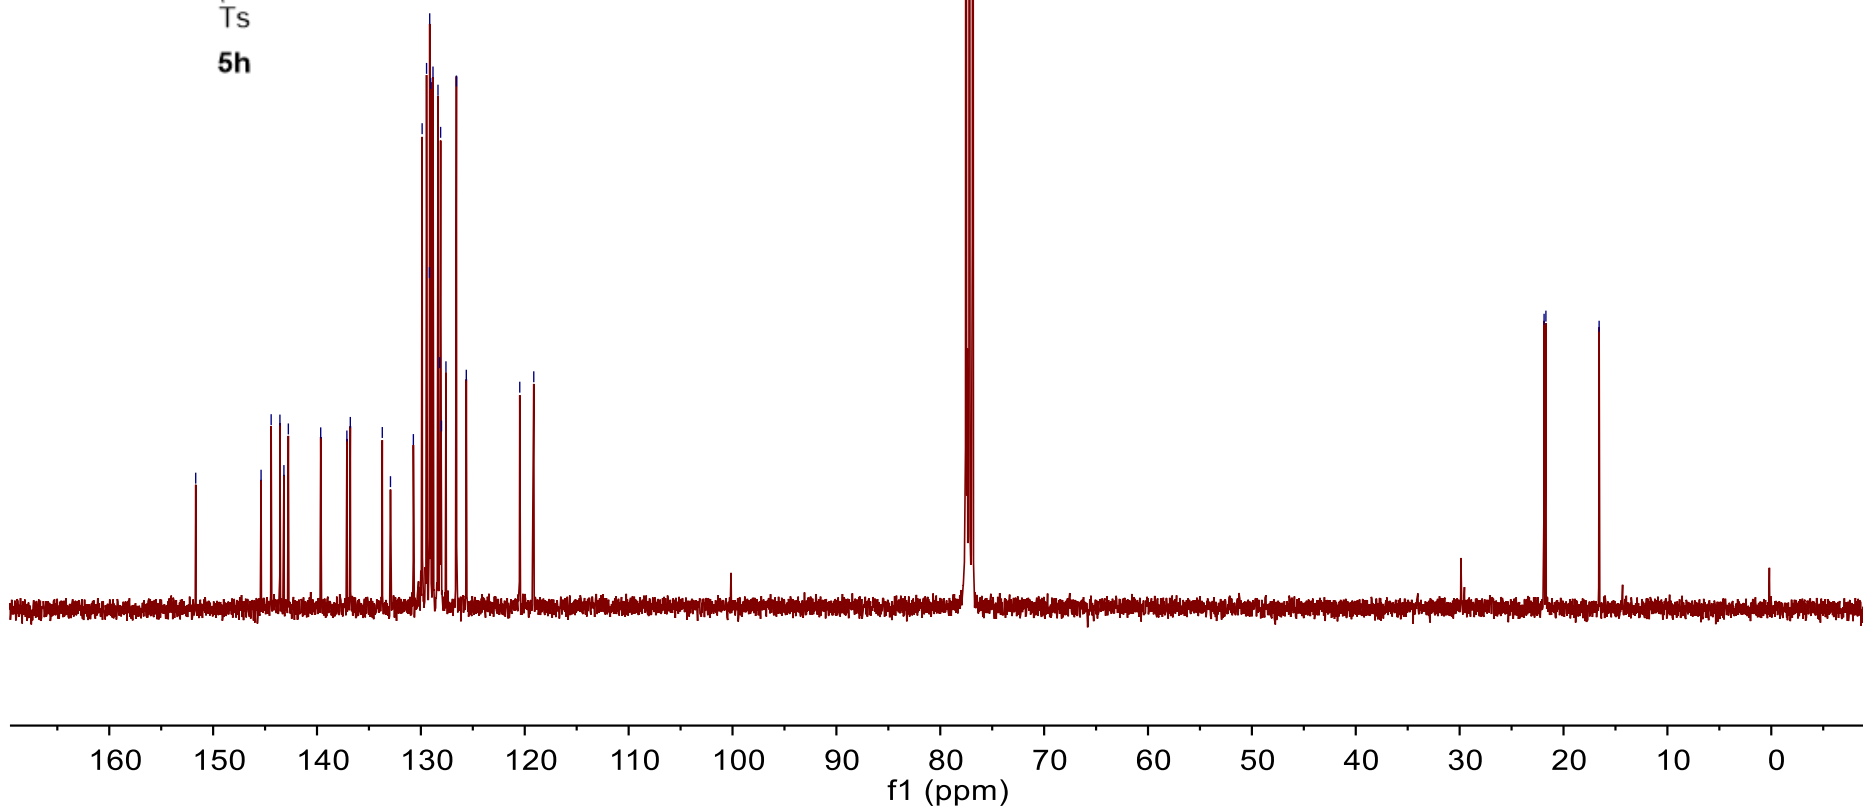

S136

ZJY-IX-39-10.fid

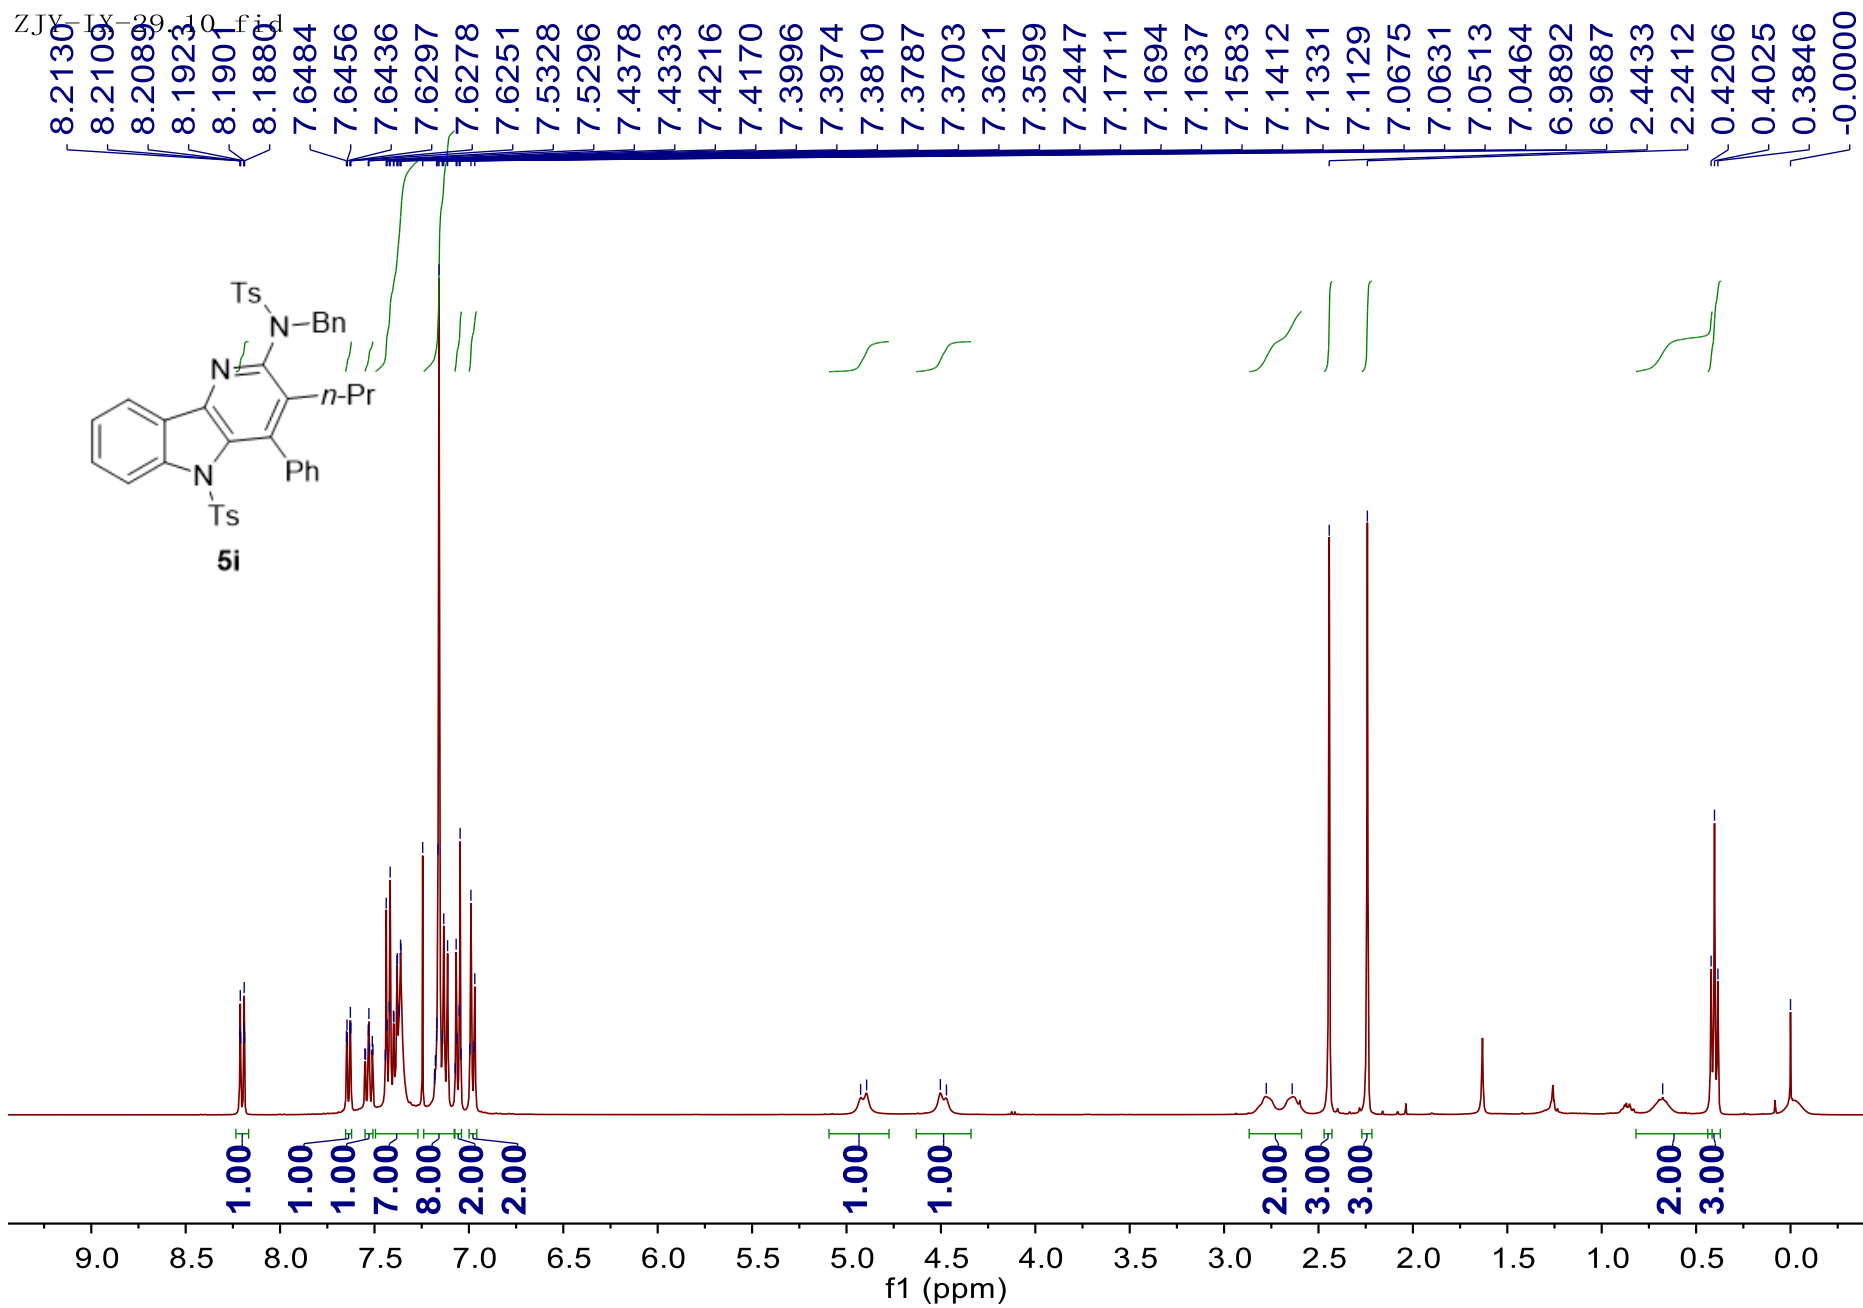

ZJY-K-1911-fd

150.086  
145.595  
144.428  
143.619  
143.004  
142.808  
137.359  
136.938  
135.612  
135.013  
133.260  
133.033  
129.970  
129.688  
129.174  
129.087  
129.025  
128.977  
128.359  
128.229  
128.048  
128.018  
127.994  
126.846  
125.846  
120.113  
119.633  
77.518  
77.200  
76.883  
54.424

— 31.149

22.236

21.780

21.660

14.625

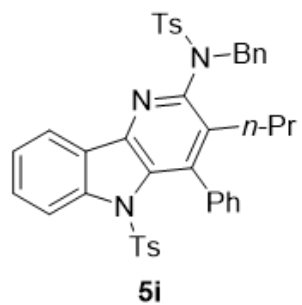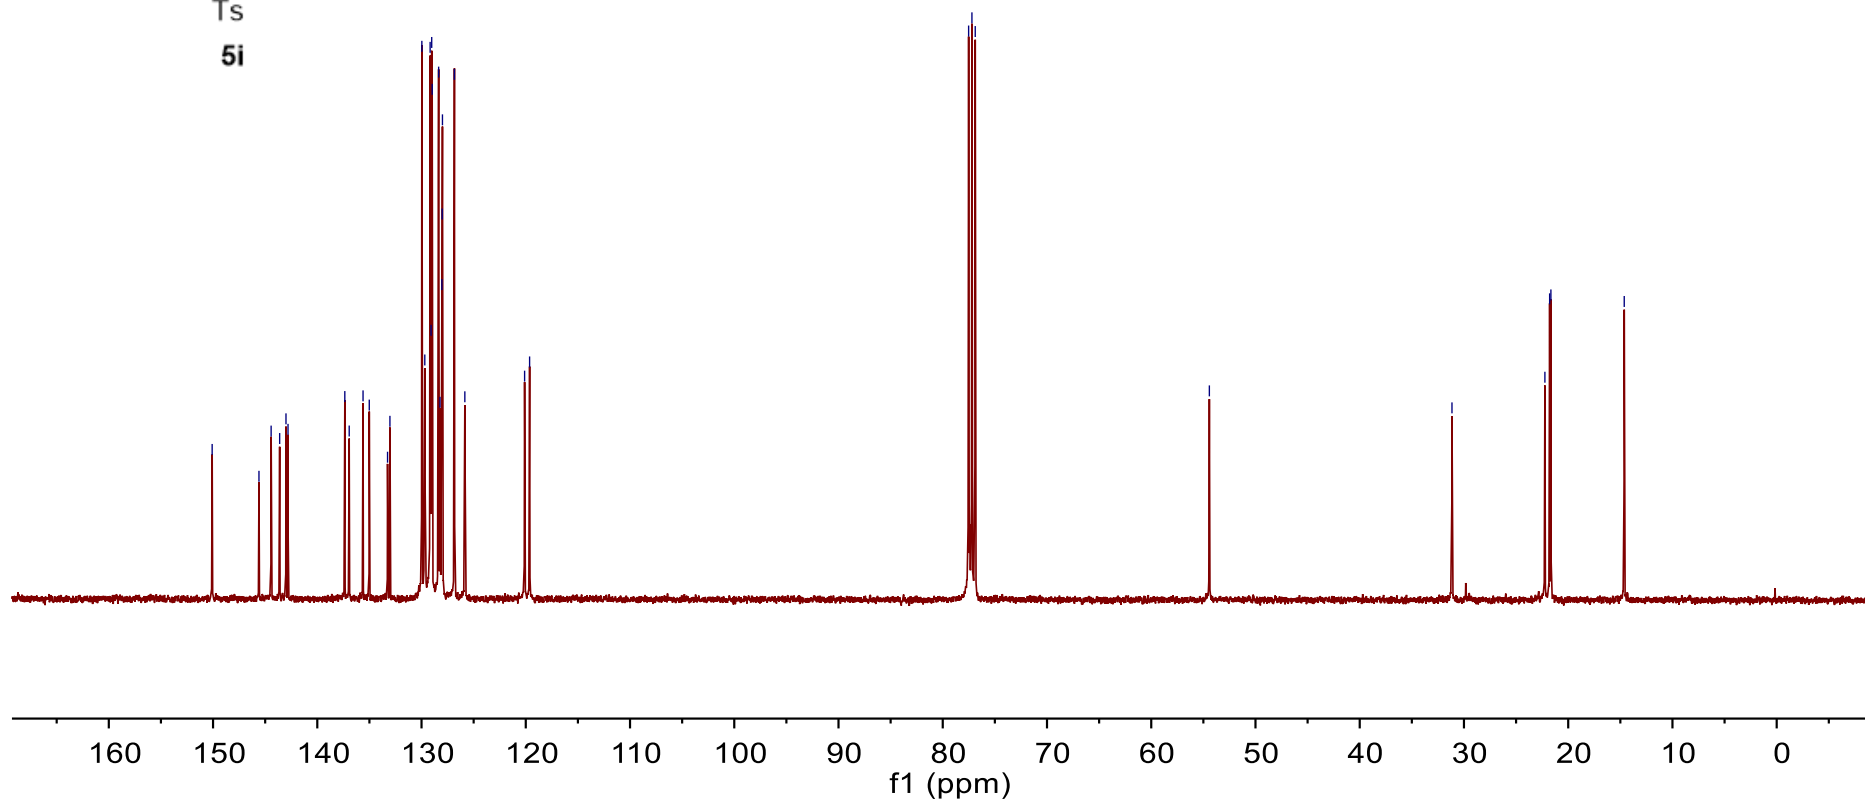

ZJ-13-2010-f1a

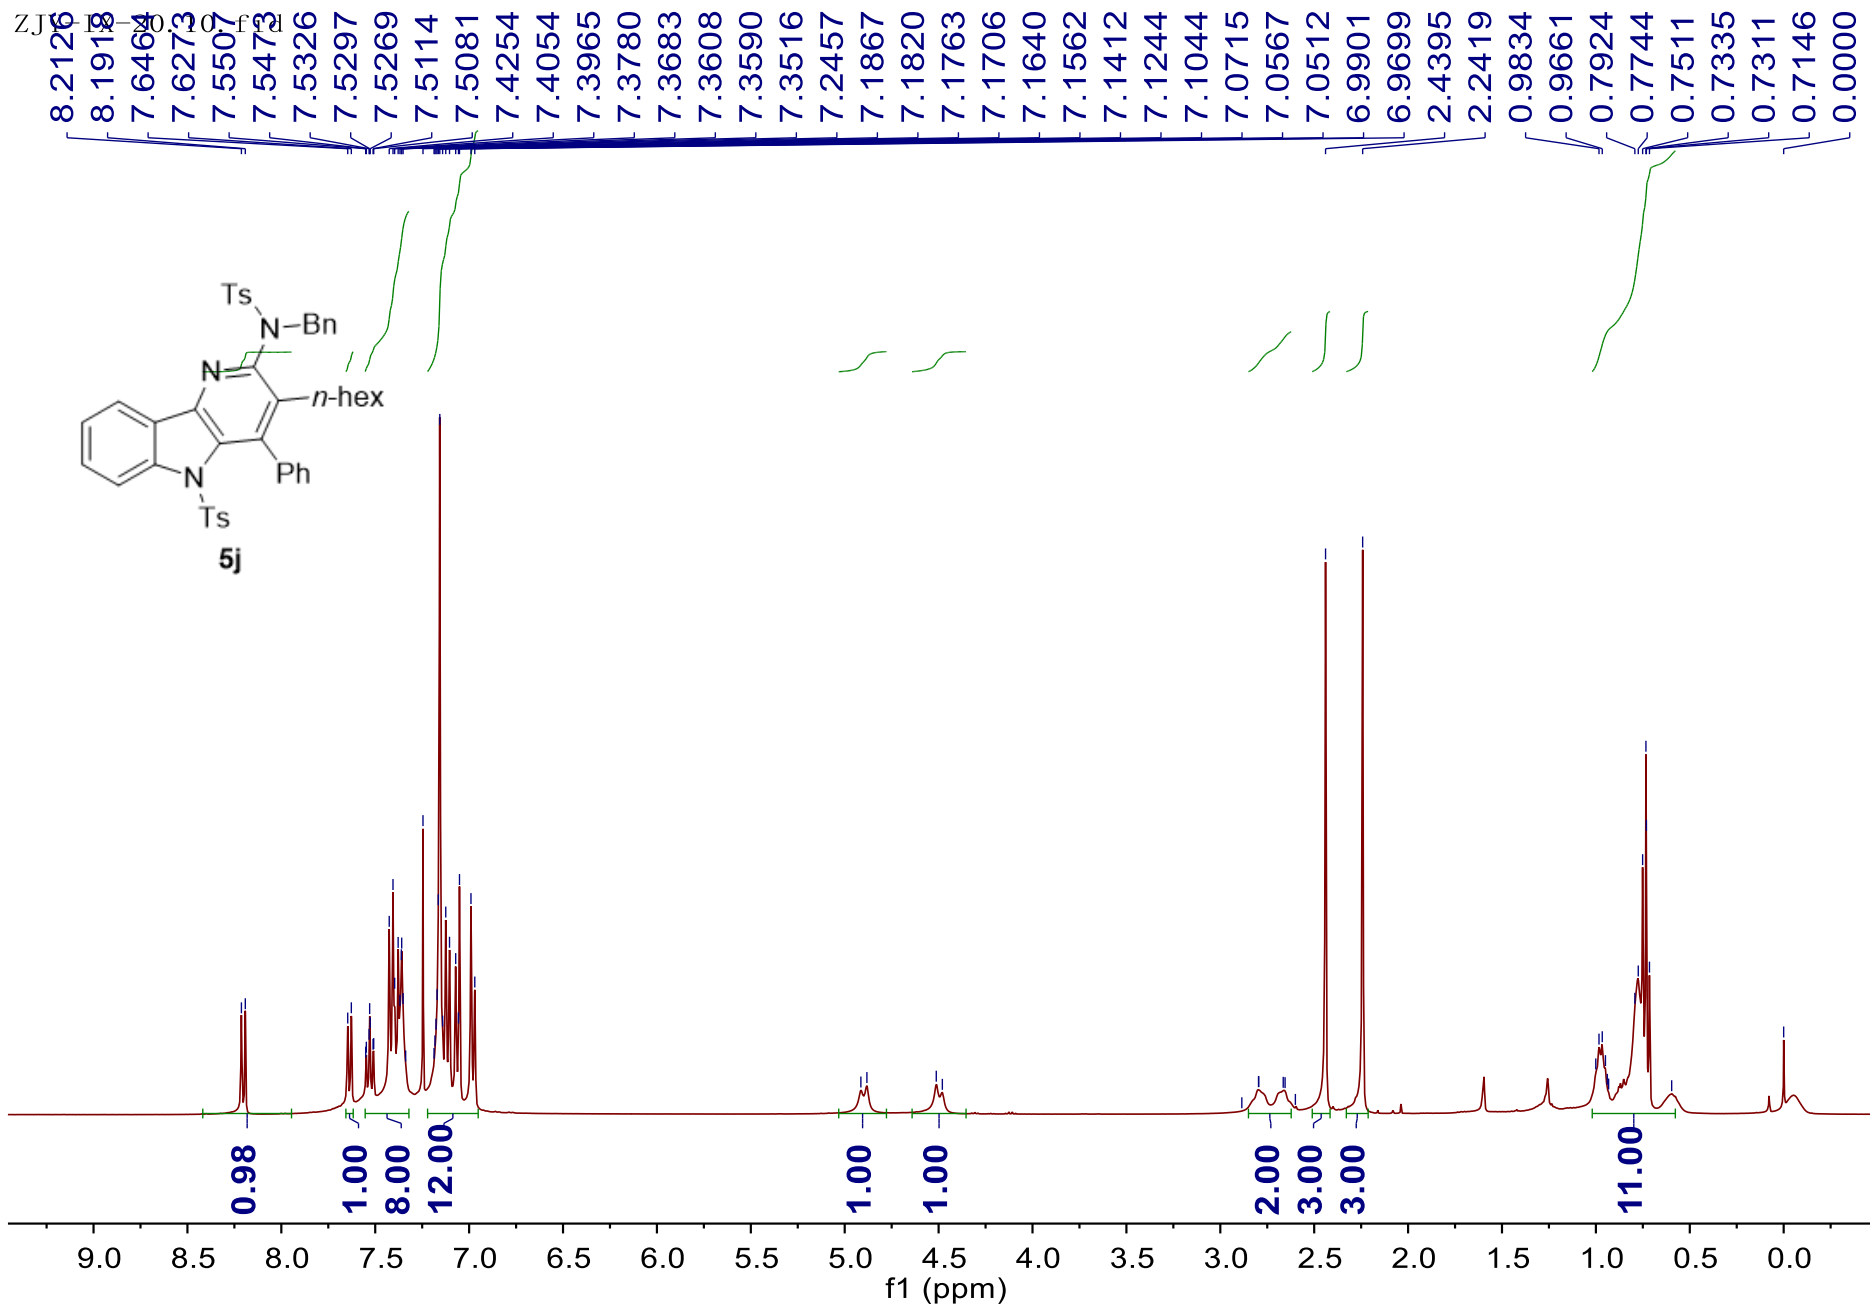



150.074  
 145.513  
 144.415  
 143.589  
 143.001  
 142.777  
 137.587  
 136.888  
 135.680  
 135.023  
 133.260  
 133.093  
 130.006  
 129.768  
 129.173  
 129.062  
 129.032  
 128.975  
 128.387  
 128.252  
 128.031  
 127.986  
 126.862  
 125.832  
 120.098  
 119.638  
 77.517  
 77.200  
 76.883  
 -54.365  
 31.000  
 29.564  
 29.072  
 28.591  
 22.397  
 21.782  
 21.666  
 14.149

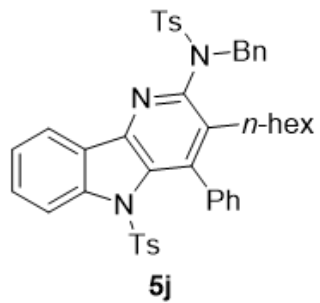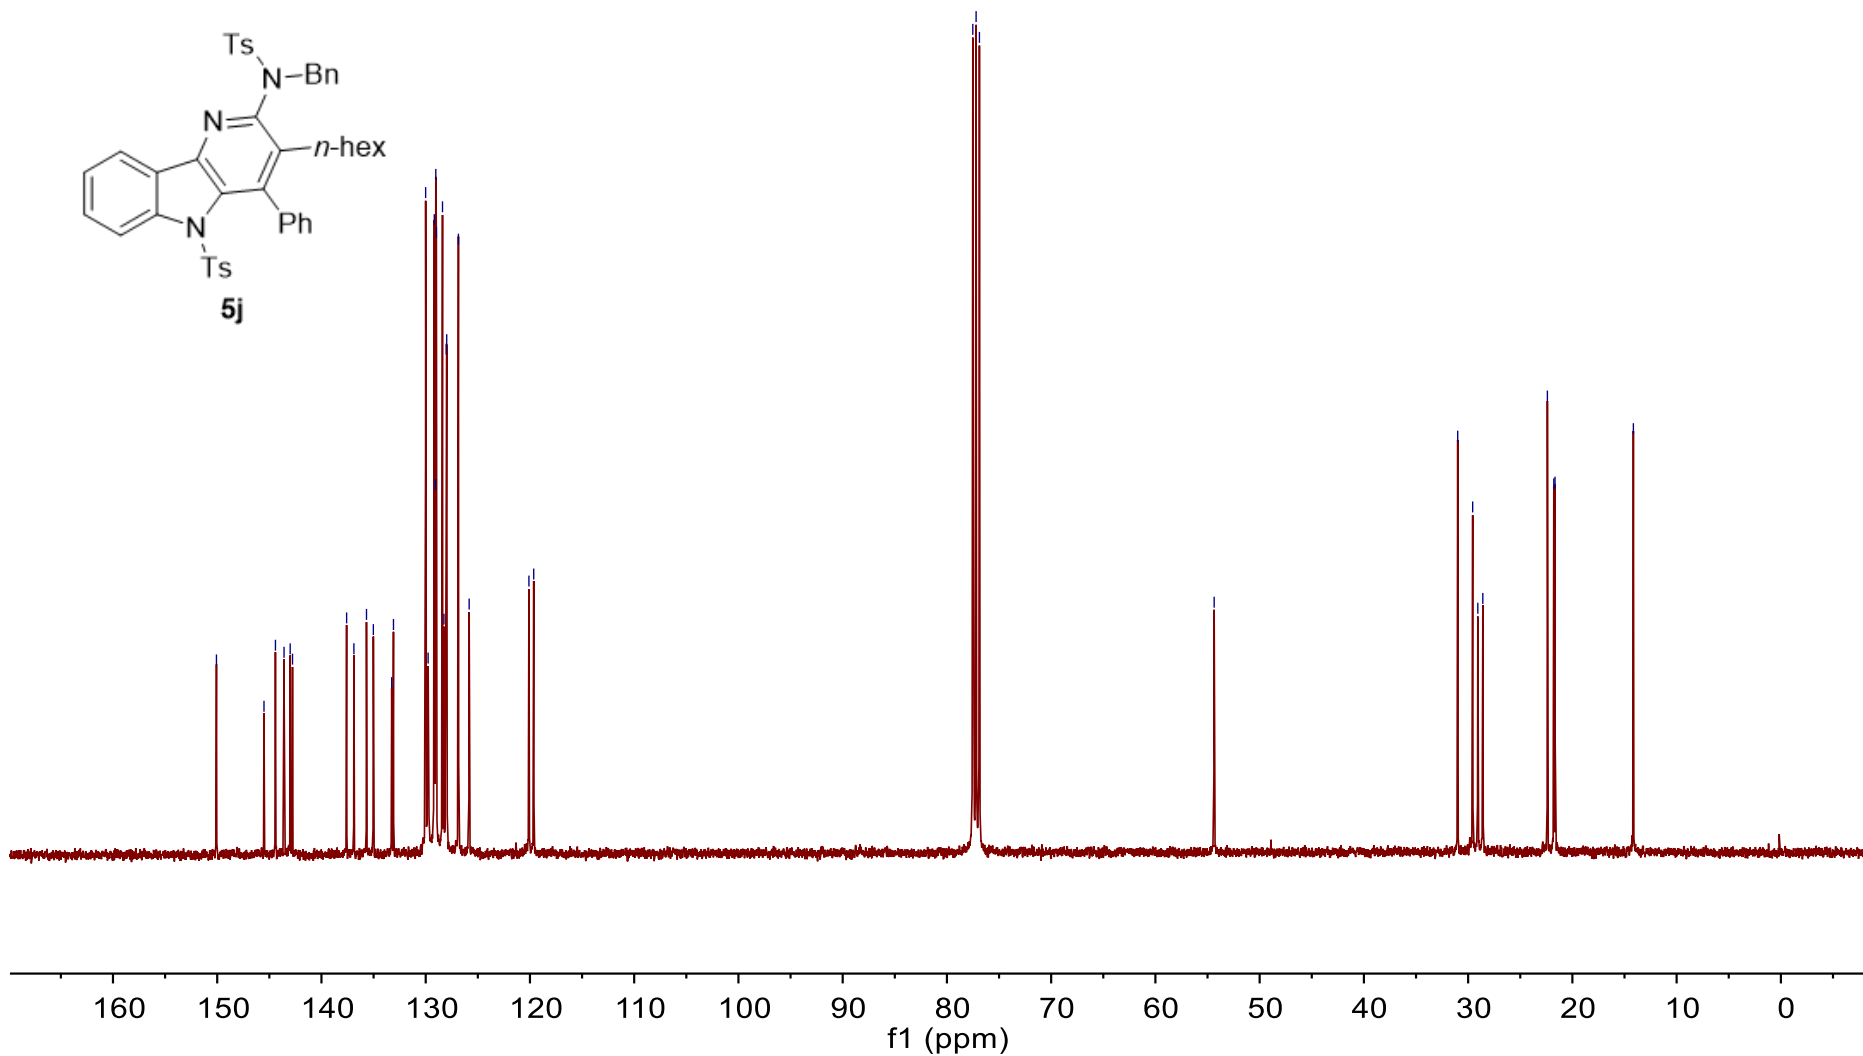

ZJY-IX-14-10.fid

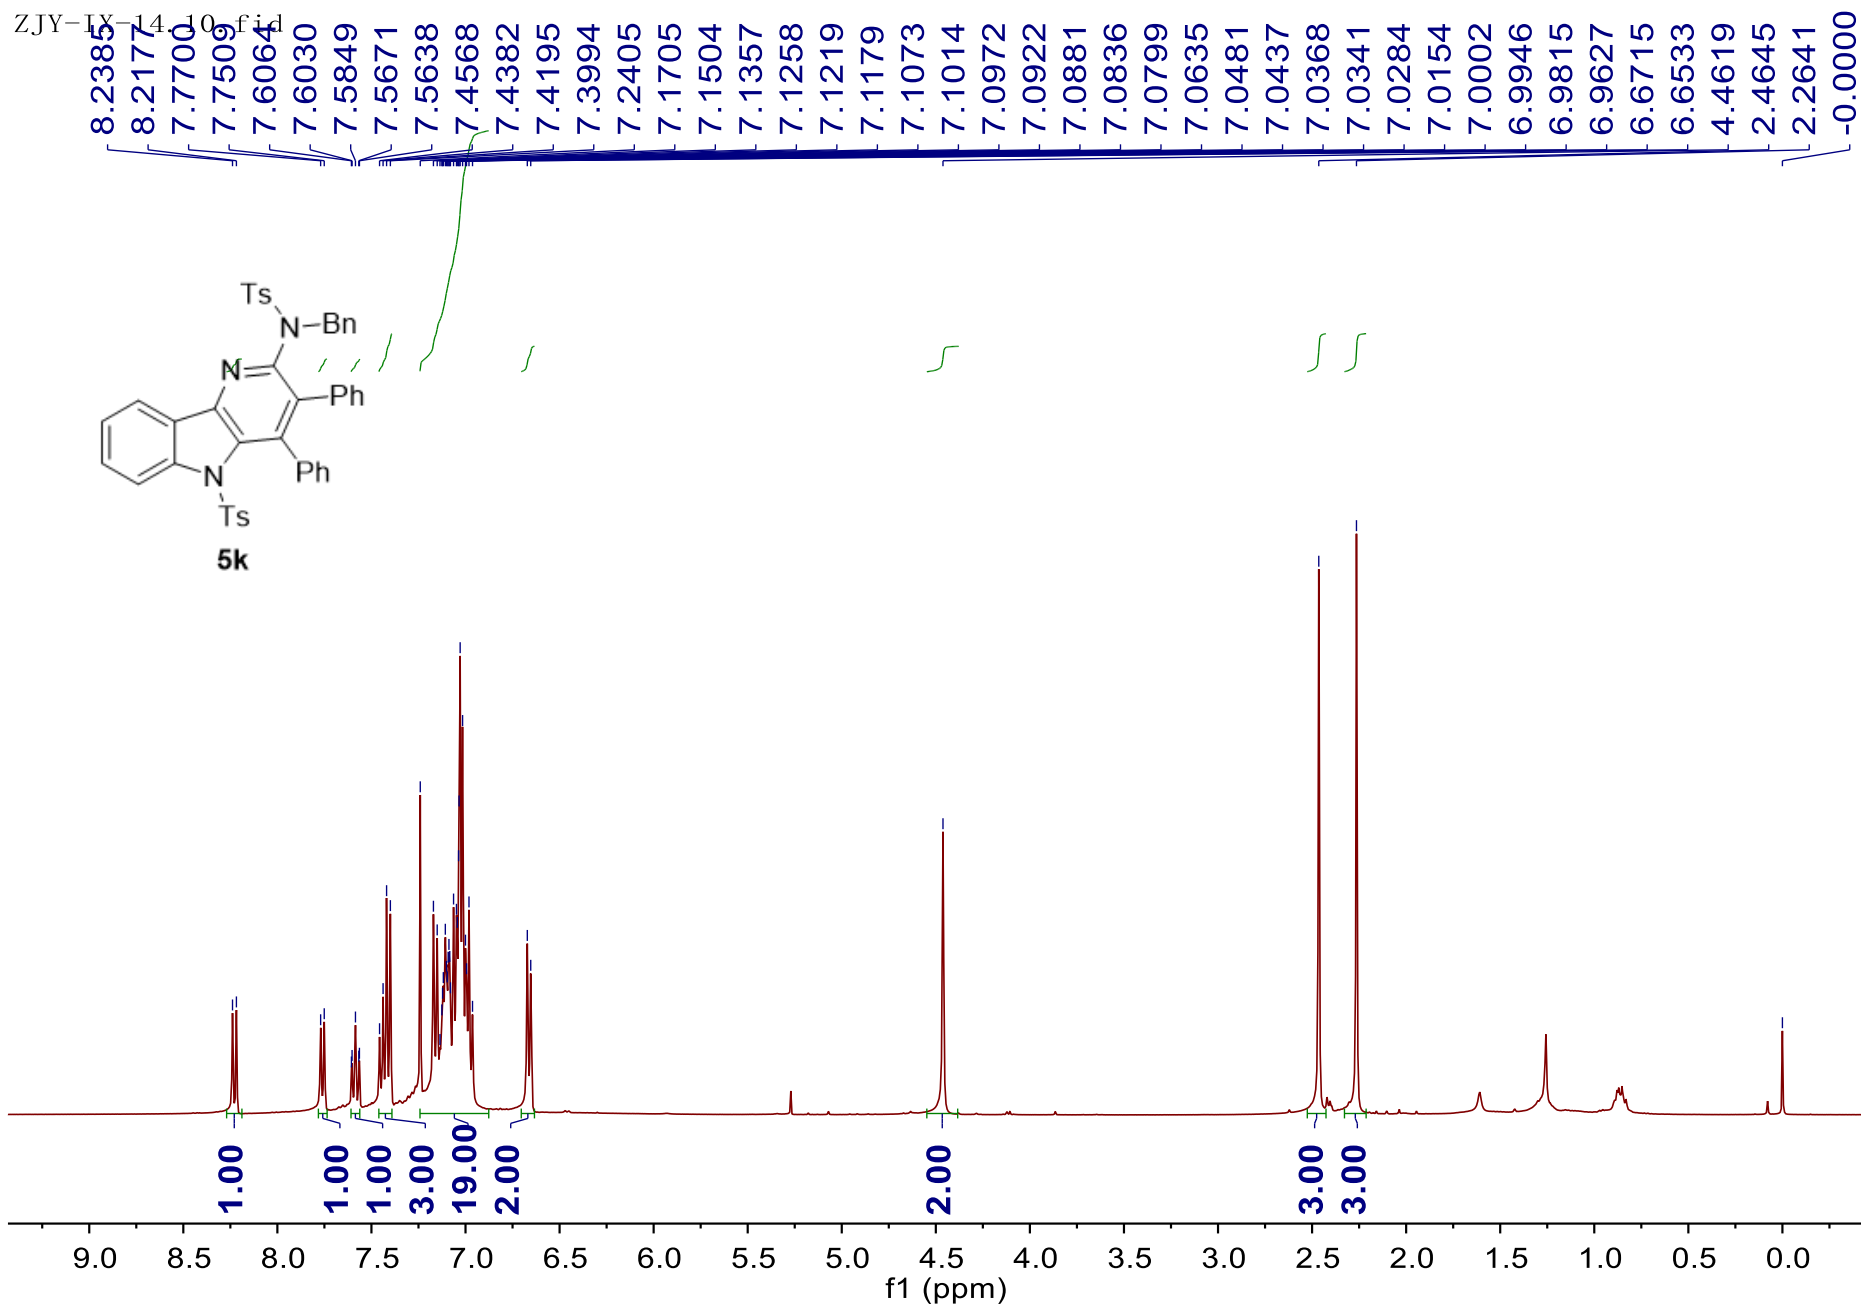

149.767  
147.564  
144.640  
143.578  
143.432  
142.959  
137.159  
136.881  
135.855  
135.237  
134.675  
133.210  
132.704  
131.579  
130.392  
129.831  
129.541  
129.434  
129.097  
128.930  
128.199  
128.170  
127.650  
127.466  
127.364  
127.008  
126.815  
126.667  
125.993  
120.627  
119.690  
77.518  
77.200  
76.883  
54.856  
  
21.790  
21.690

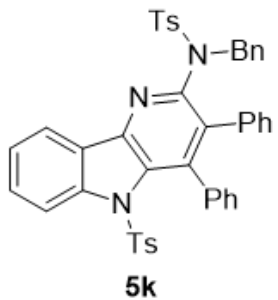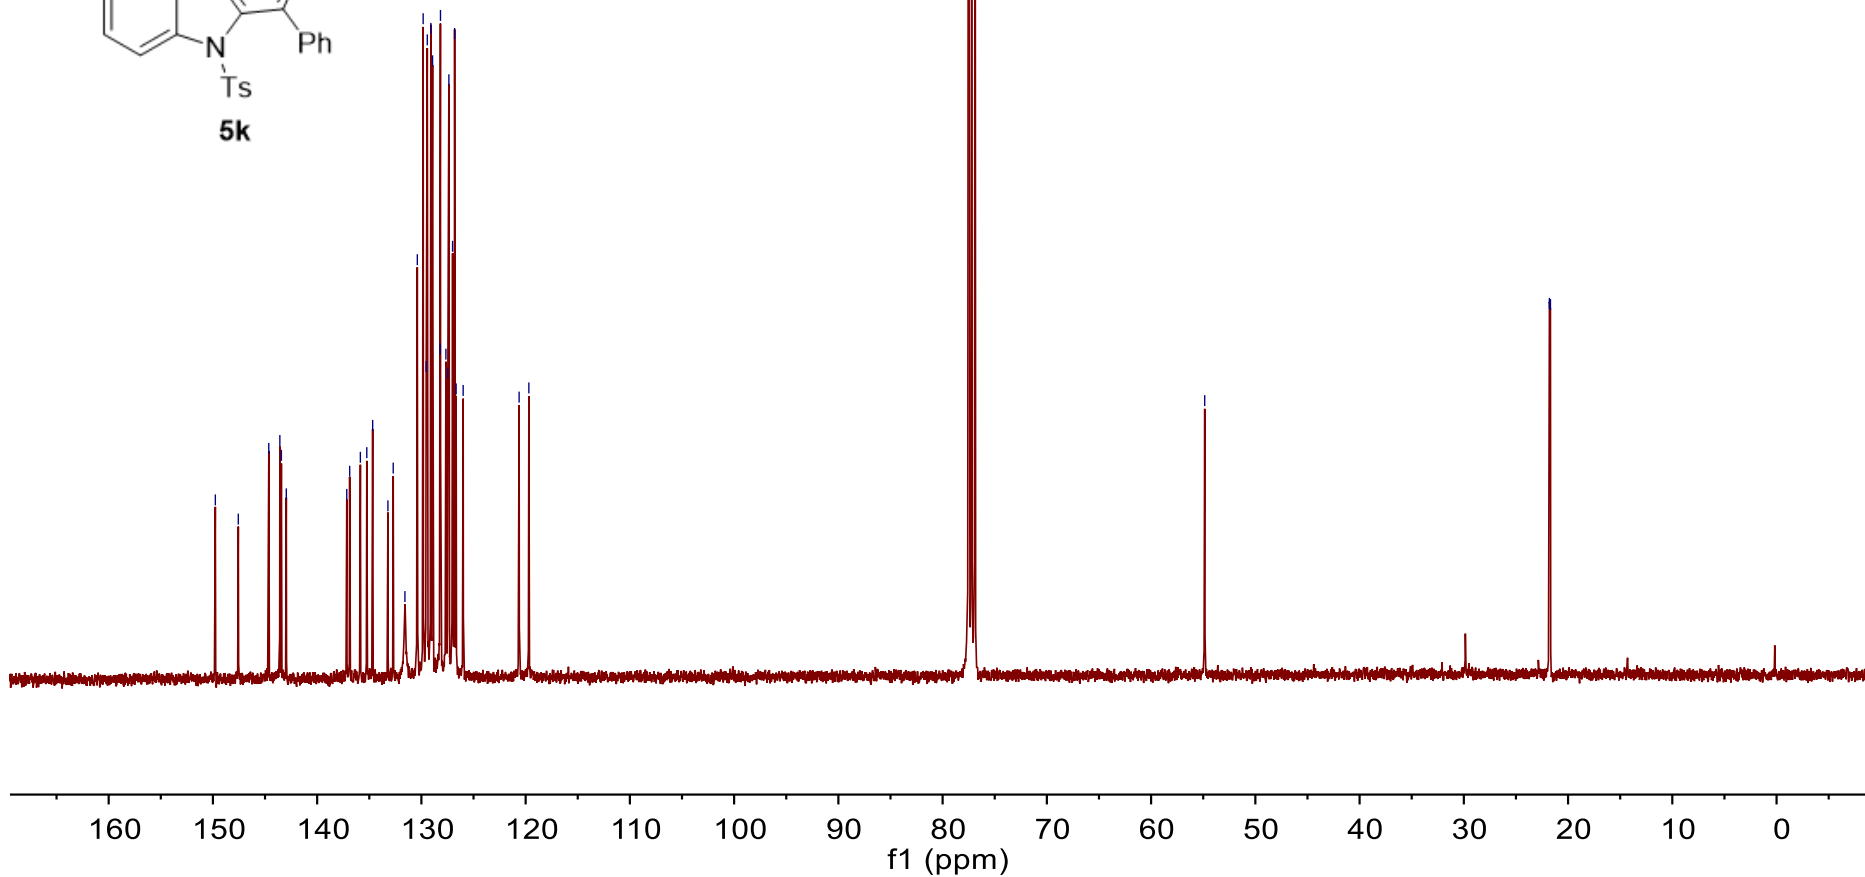

ZJY-IX-42-10.fid

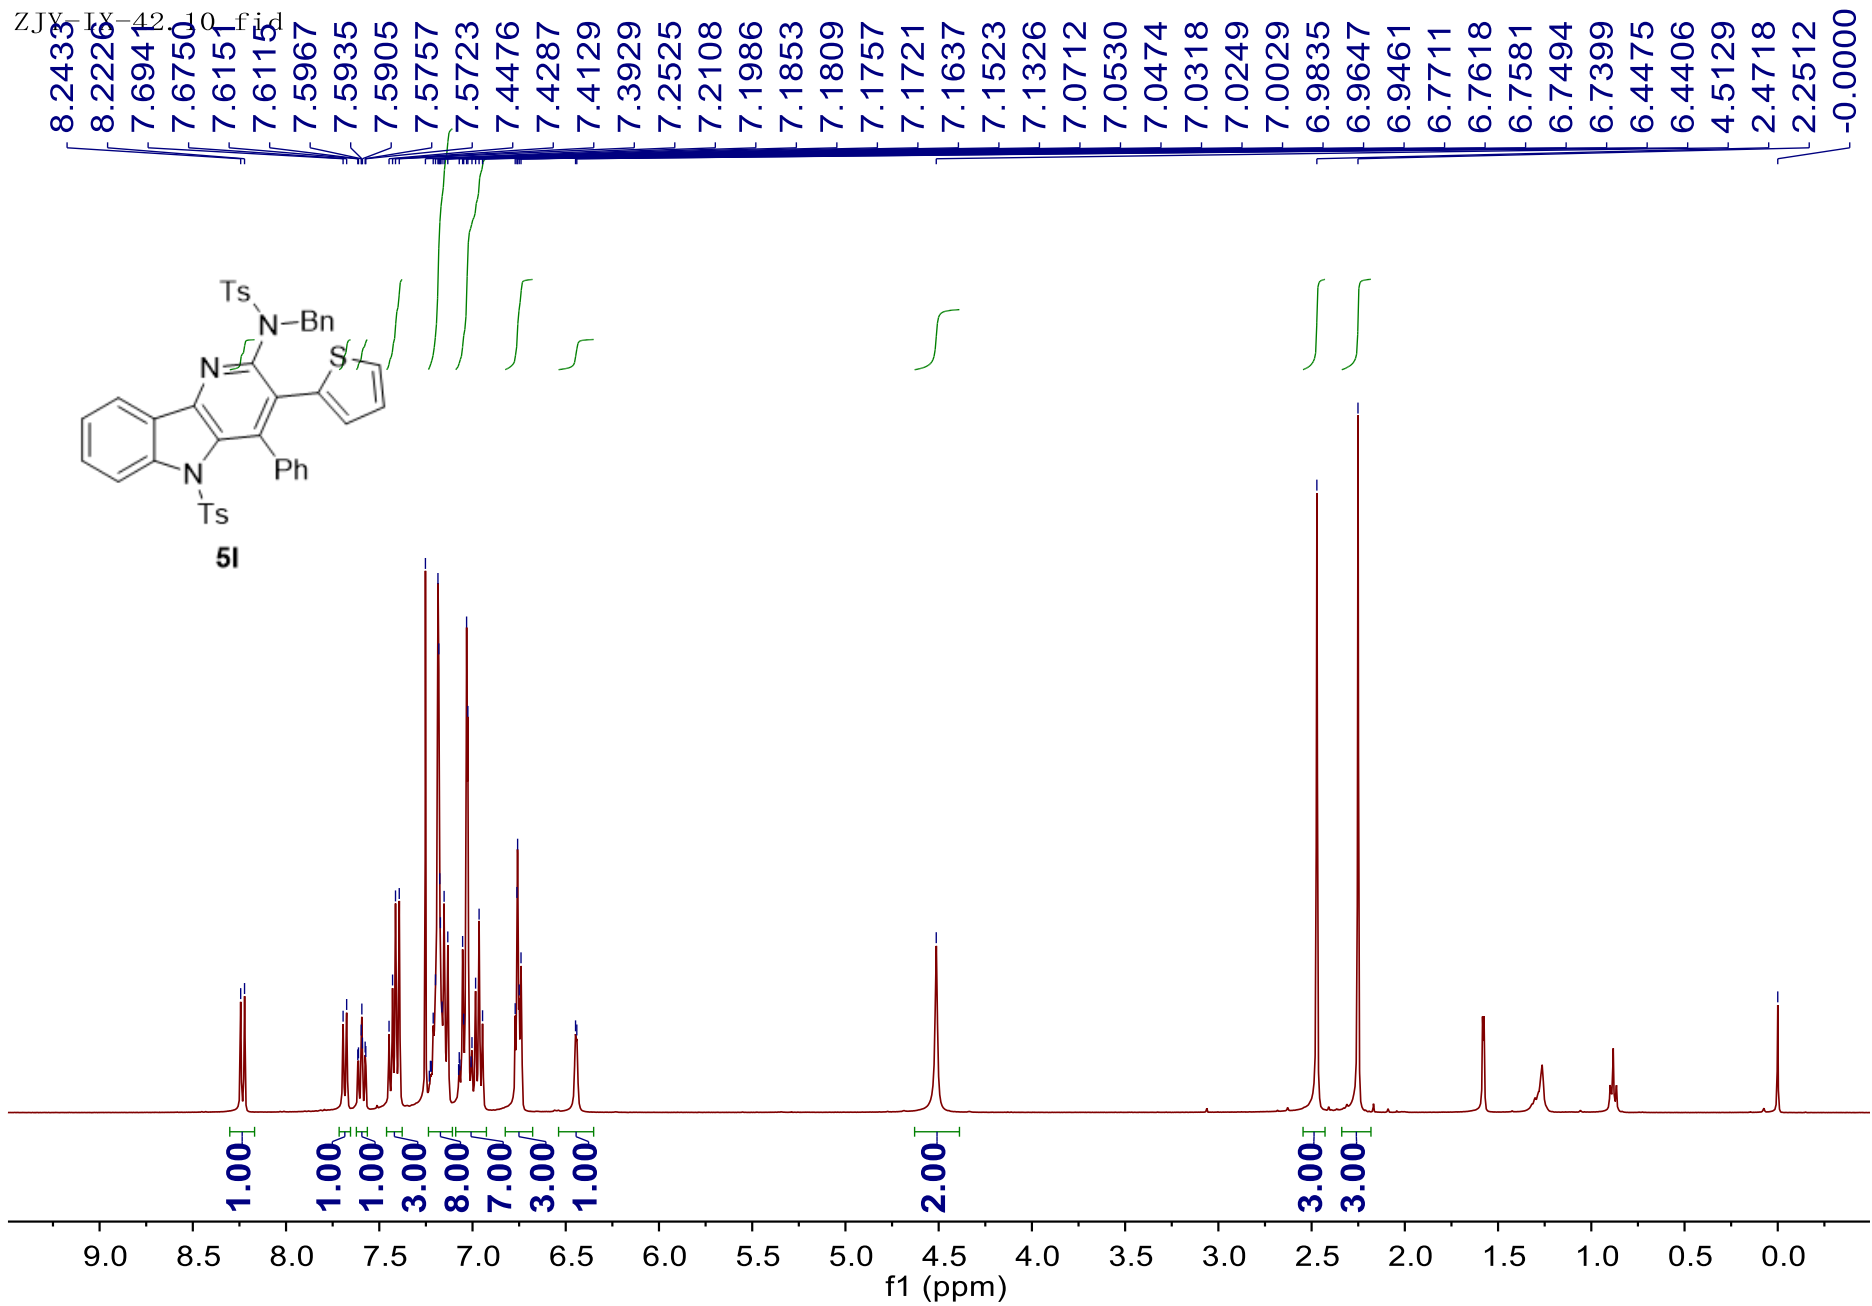

150.702  
147.841  
144.710  
143.932  
143.627  
143.613  
137.087  
135.582  
135.455  
134.841  
133.161  
132.471  
131.288  
130.467  
129.994  
129.755  
129.387  
129.126  
128.908  
128.123  
128.095  
127.850  
127.591  
127.515  
127.190  
126.922  
126.119  
125.870  
120.552  
119.874  
77.518  
77.200  
76.882  
54.739  
  
21.816  
21.699

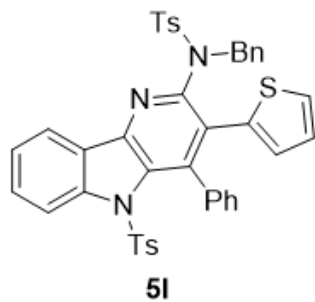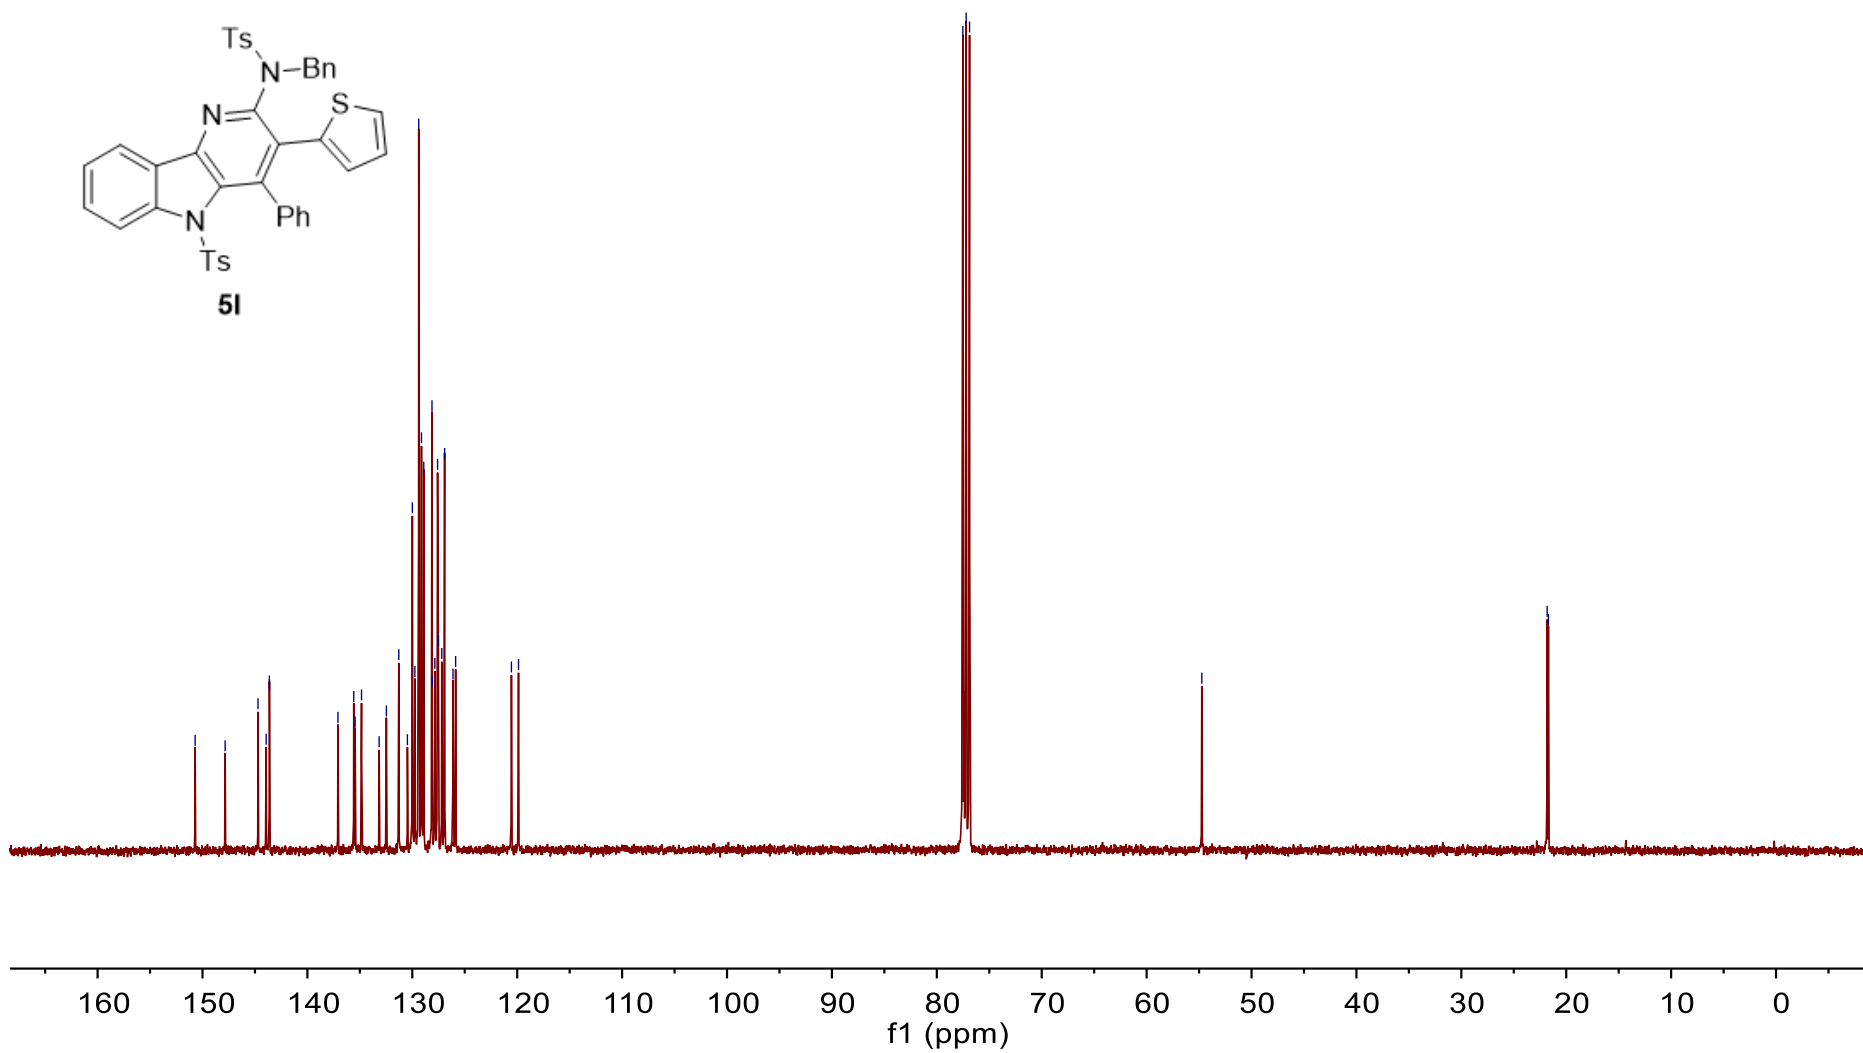

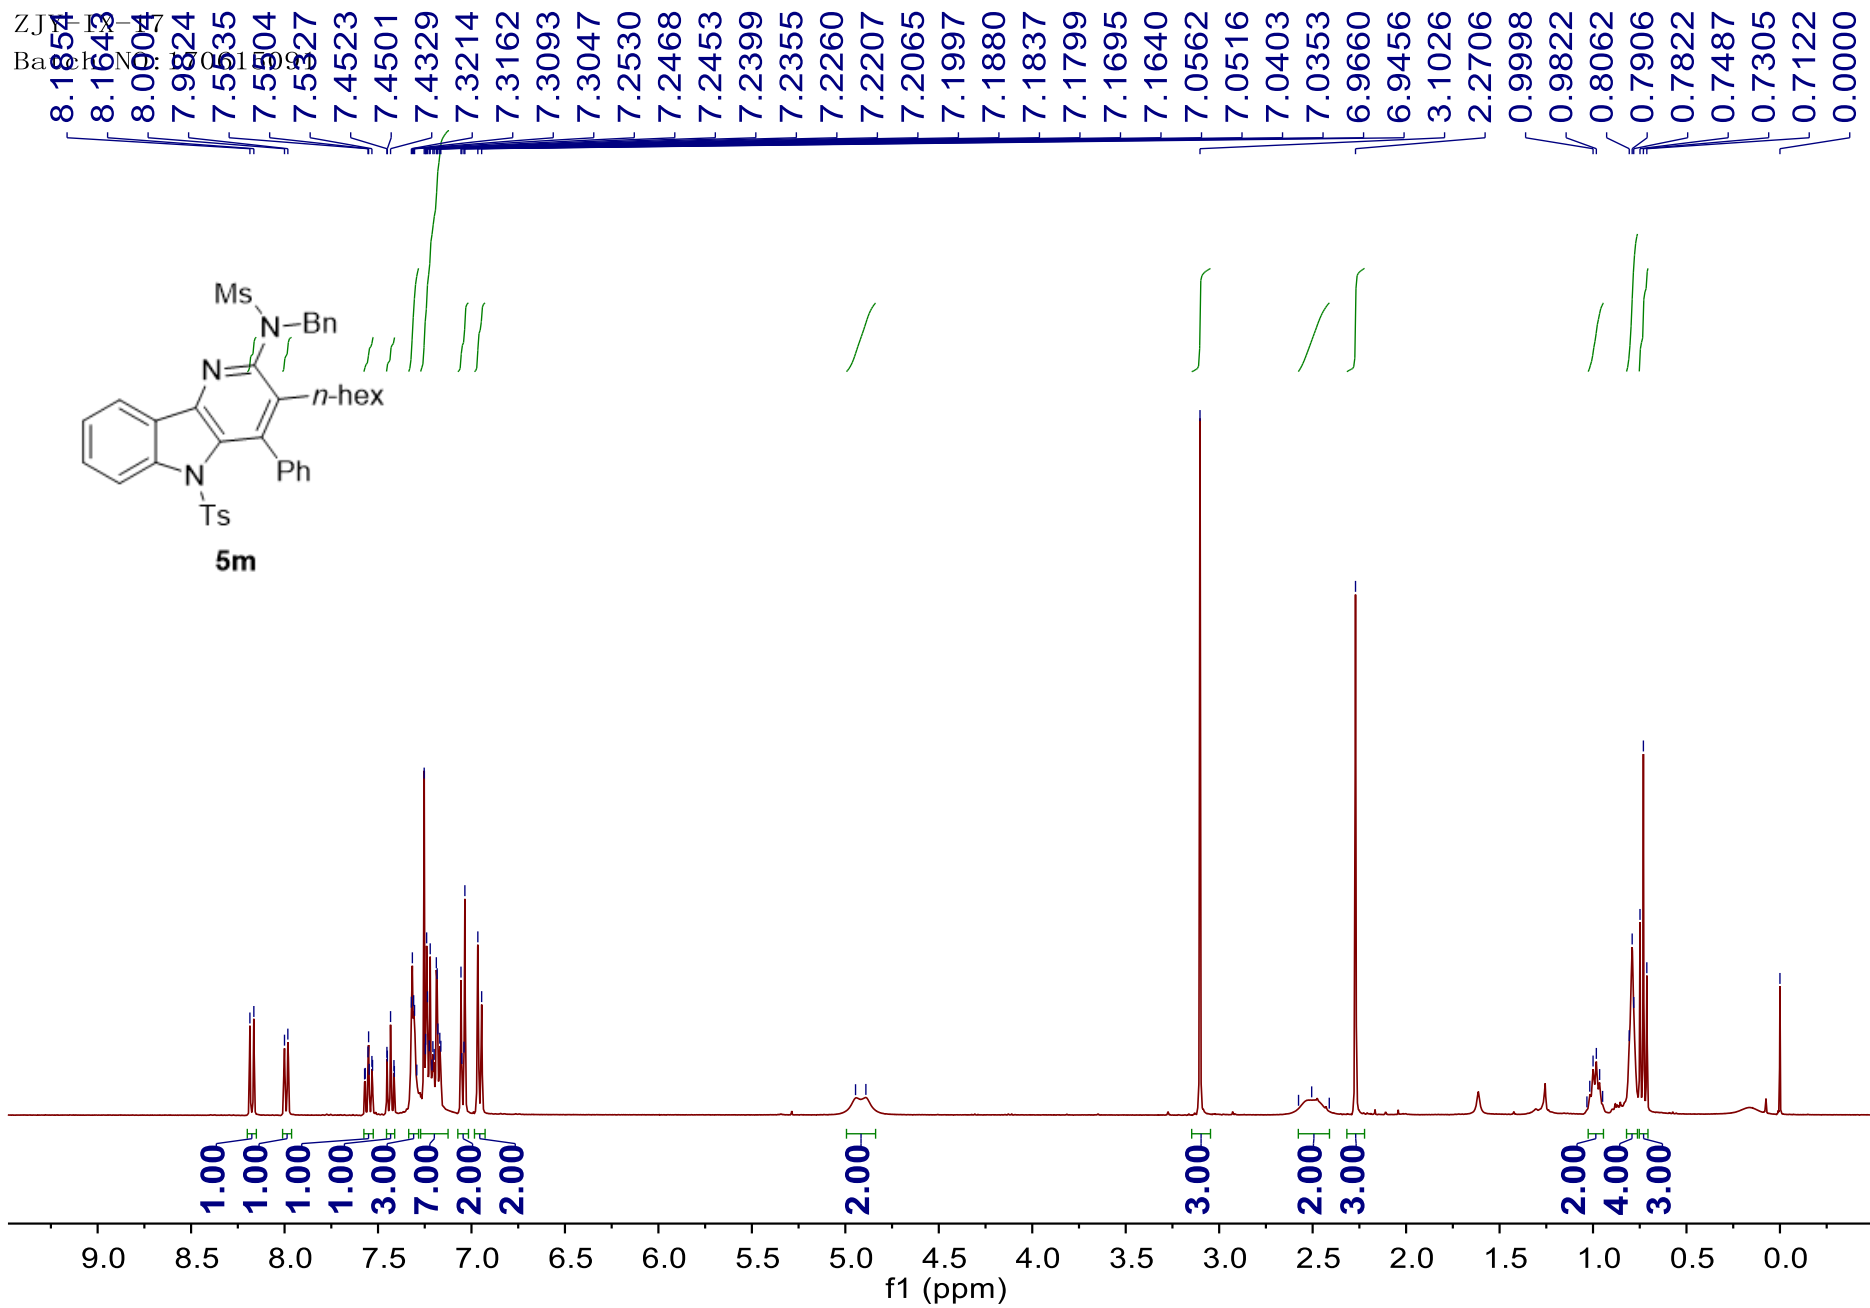

ZJY-LX-100ppm  
Gradient Spinning

150.174  
145.711  
144.580  
143.610  
142.992  
137.189  
136.644  
135.395  
133.732  
133.471  
130.106  
129.776  
129.332  
129.108  
128.509  
128.338  
128.105  
127.886  
127.761  
126.547  
125.709  
120.287  
119.276  
77.518  
77.200  
76.882

— 55.457

37.686  
31.005  
29.580  
28.891  
28.753  
22.416  
21.680  
14.146

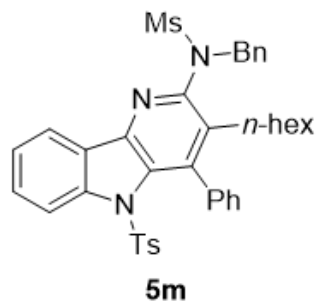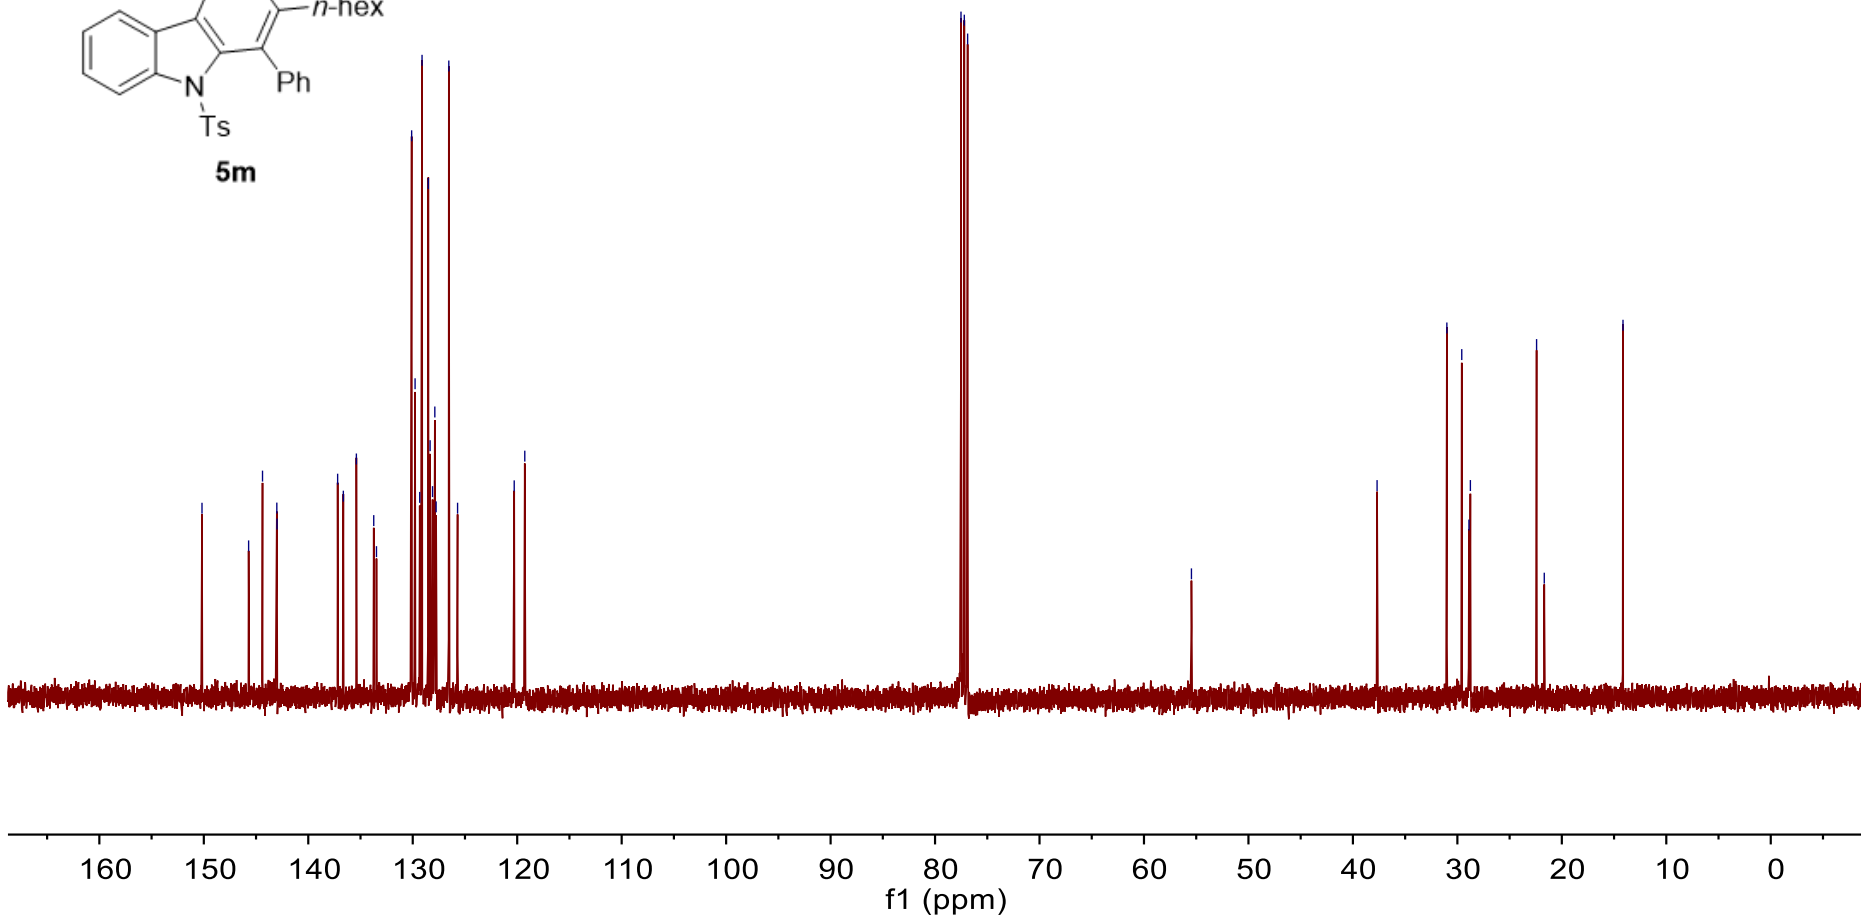

ZJY-LX-43-10.fid

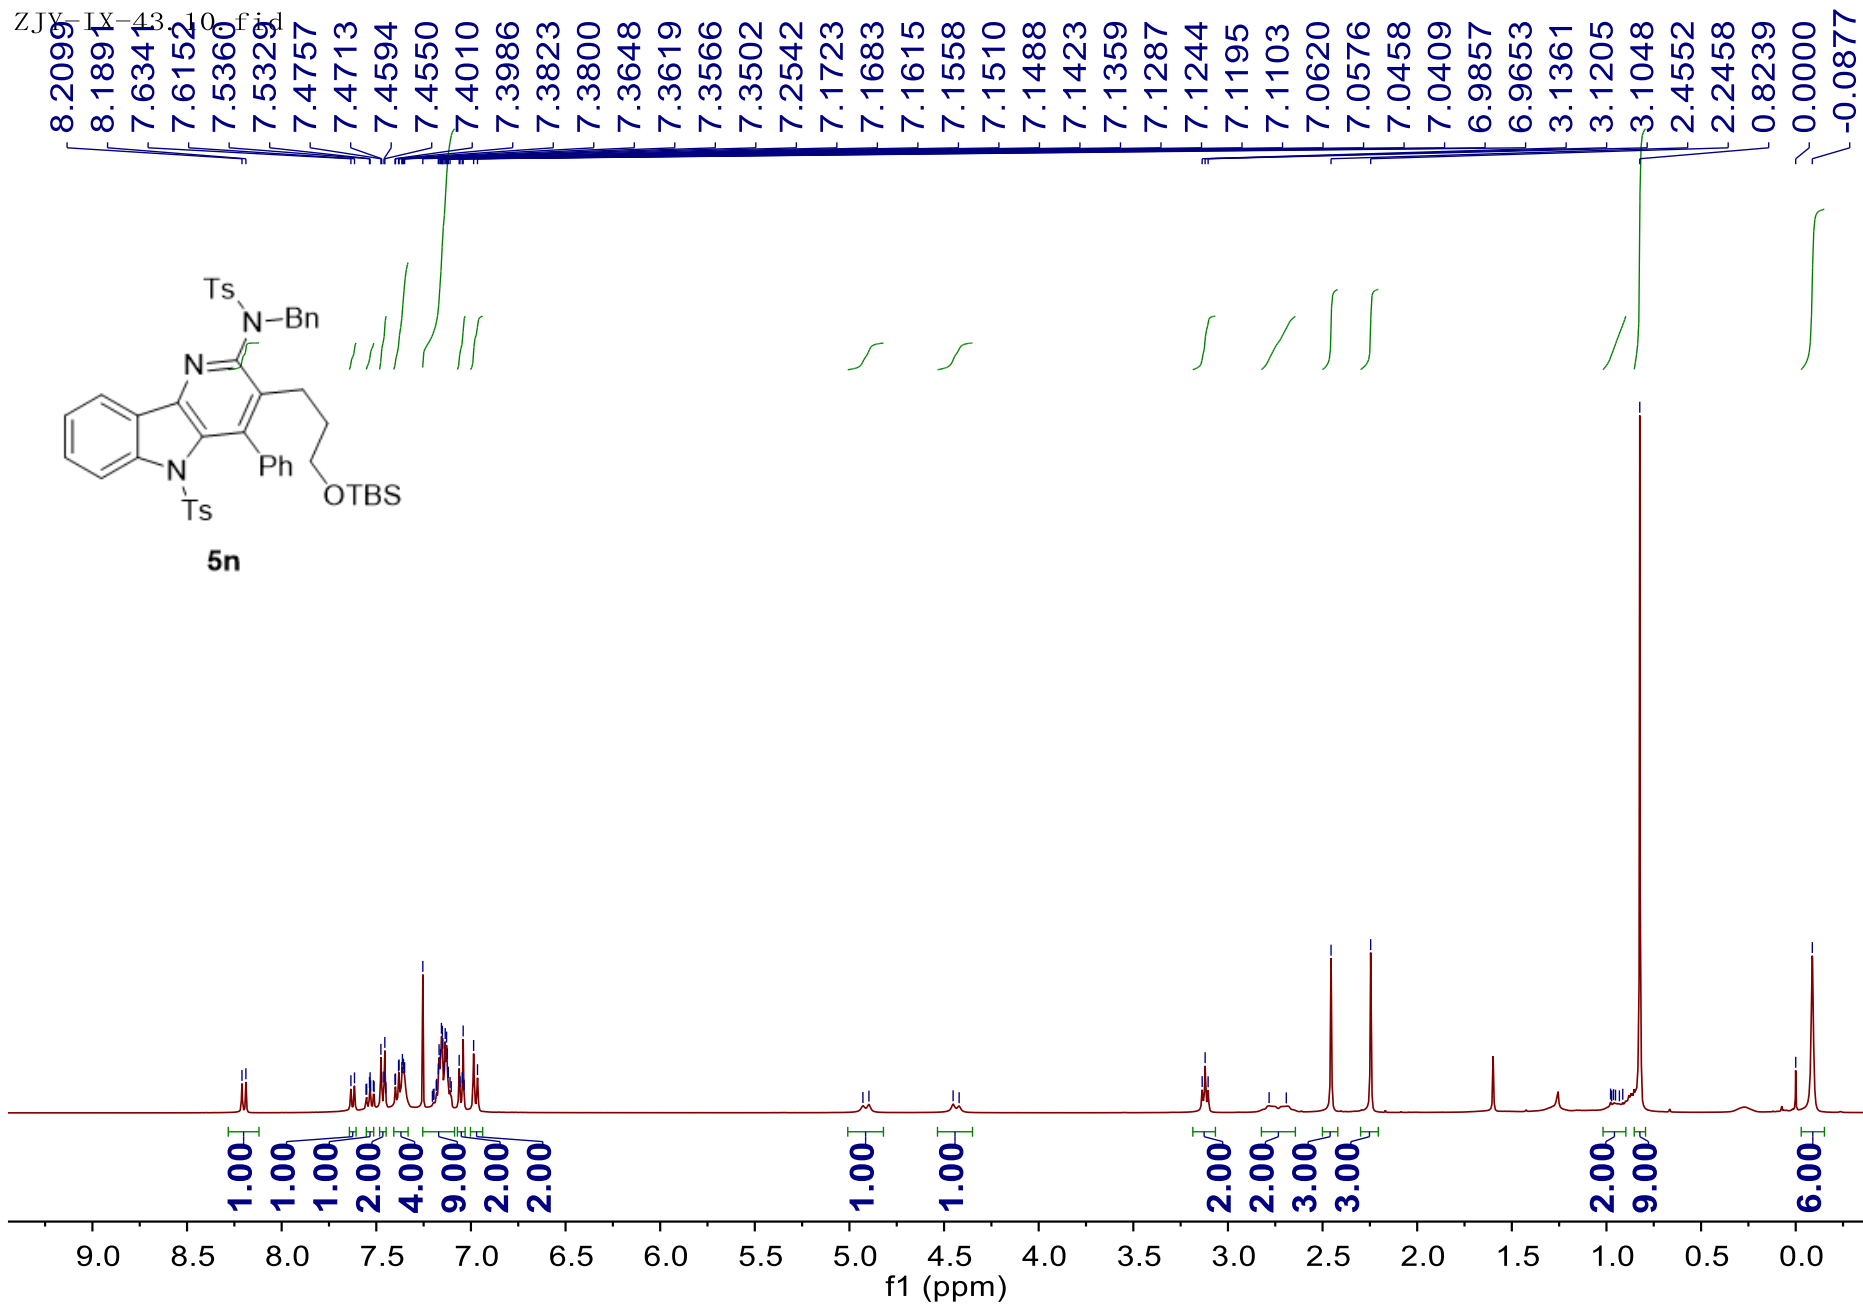



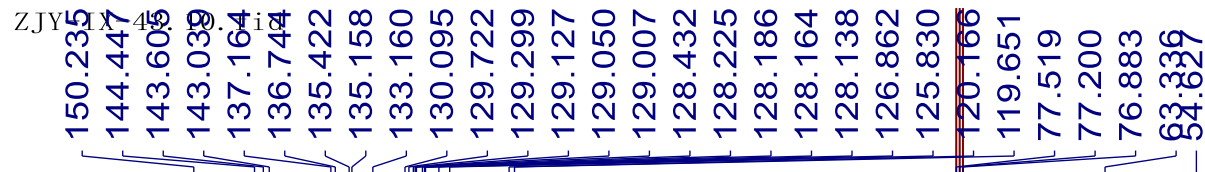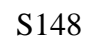

ZJY-IX-61pure/10

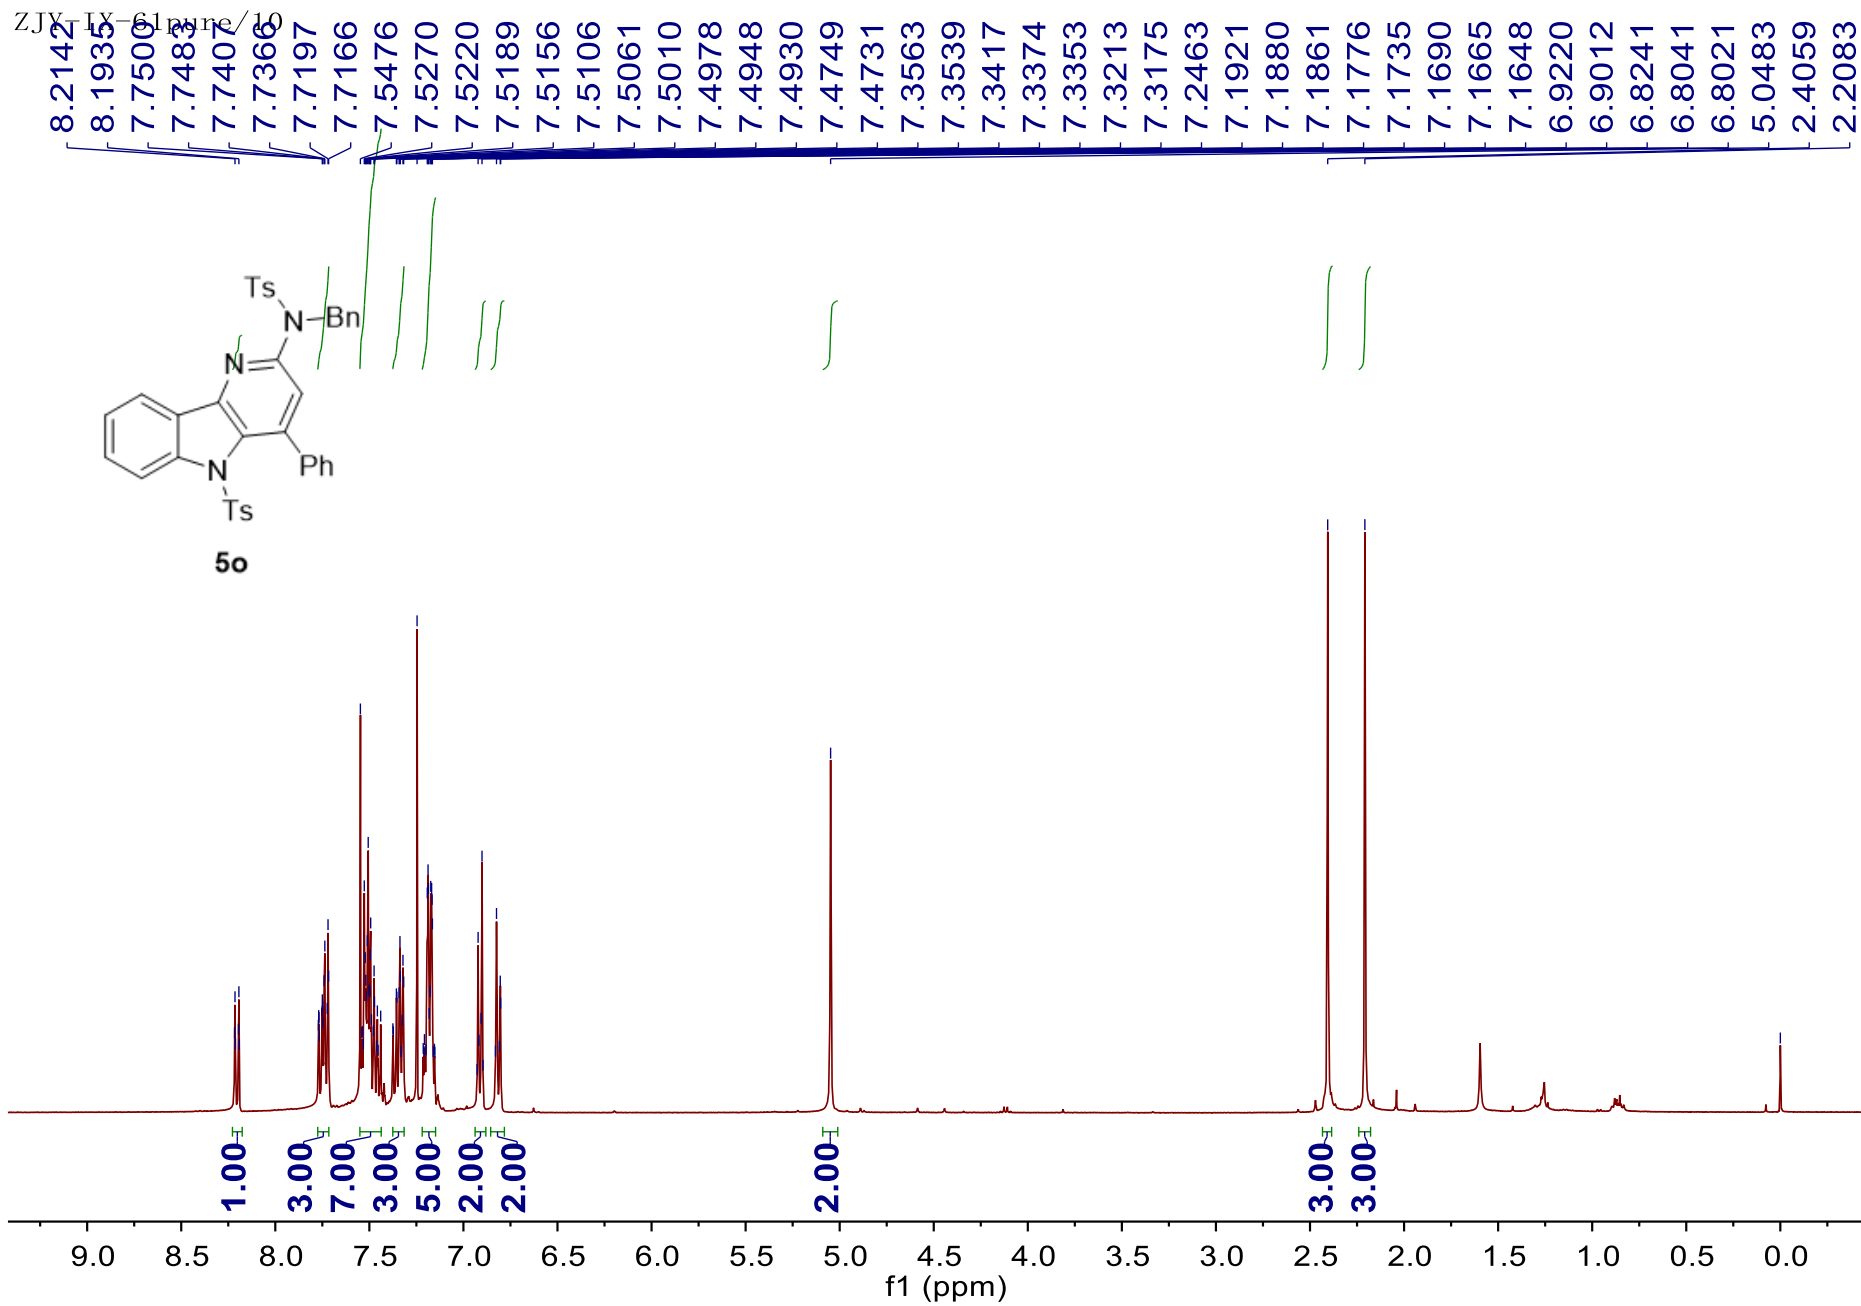

S149

ZJY-13-01-001

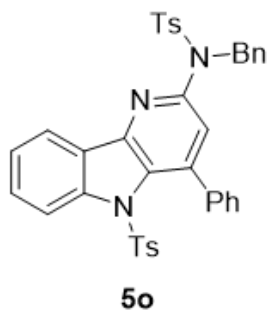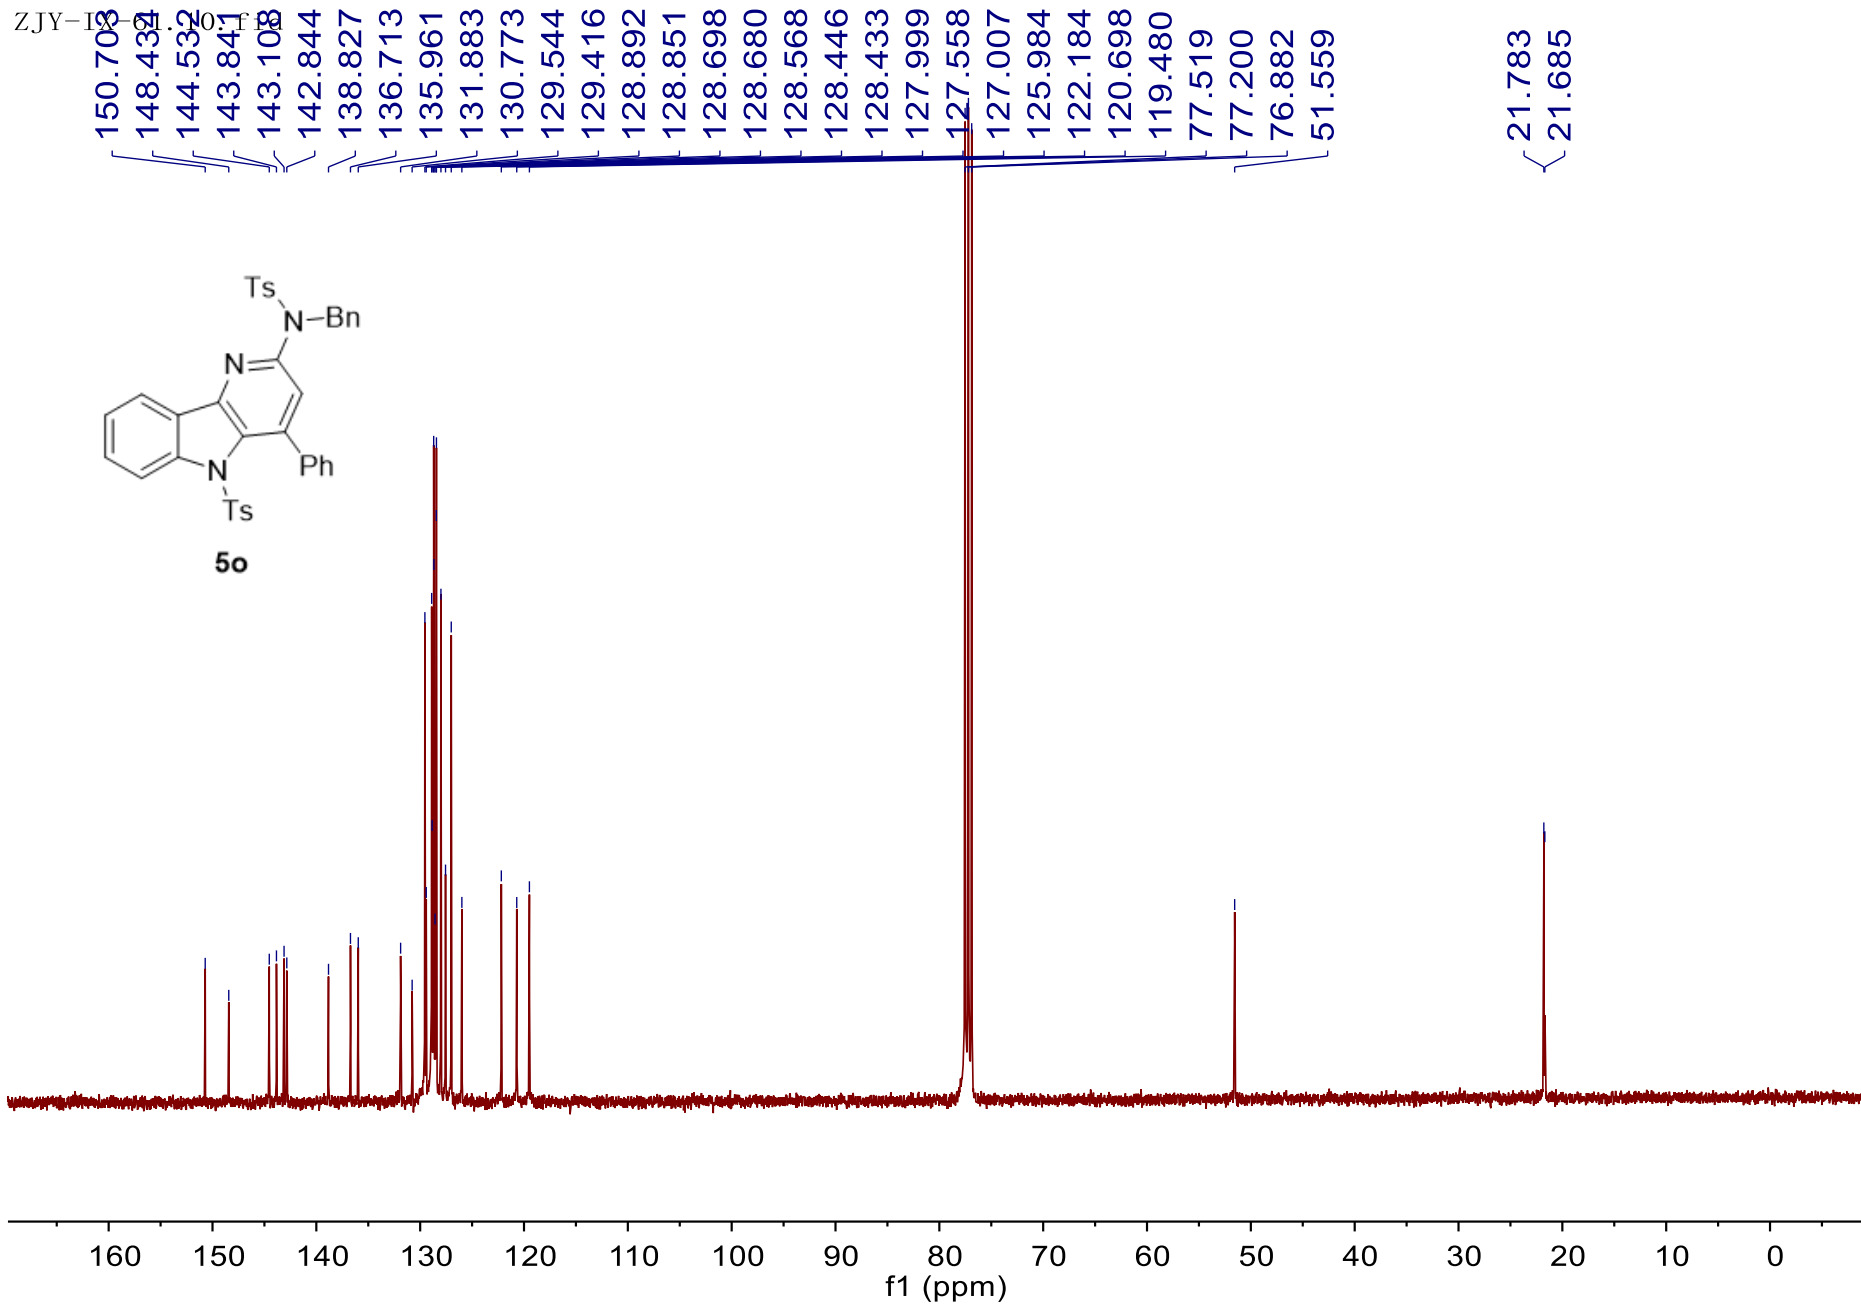

S150

ZJY-IX-54pure/10

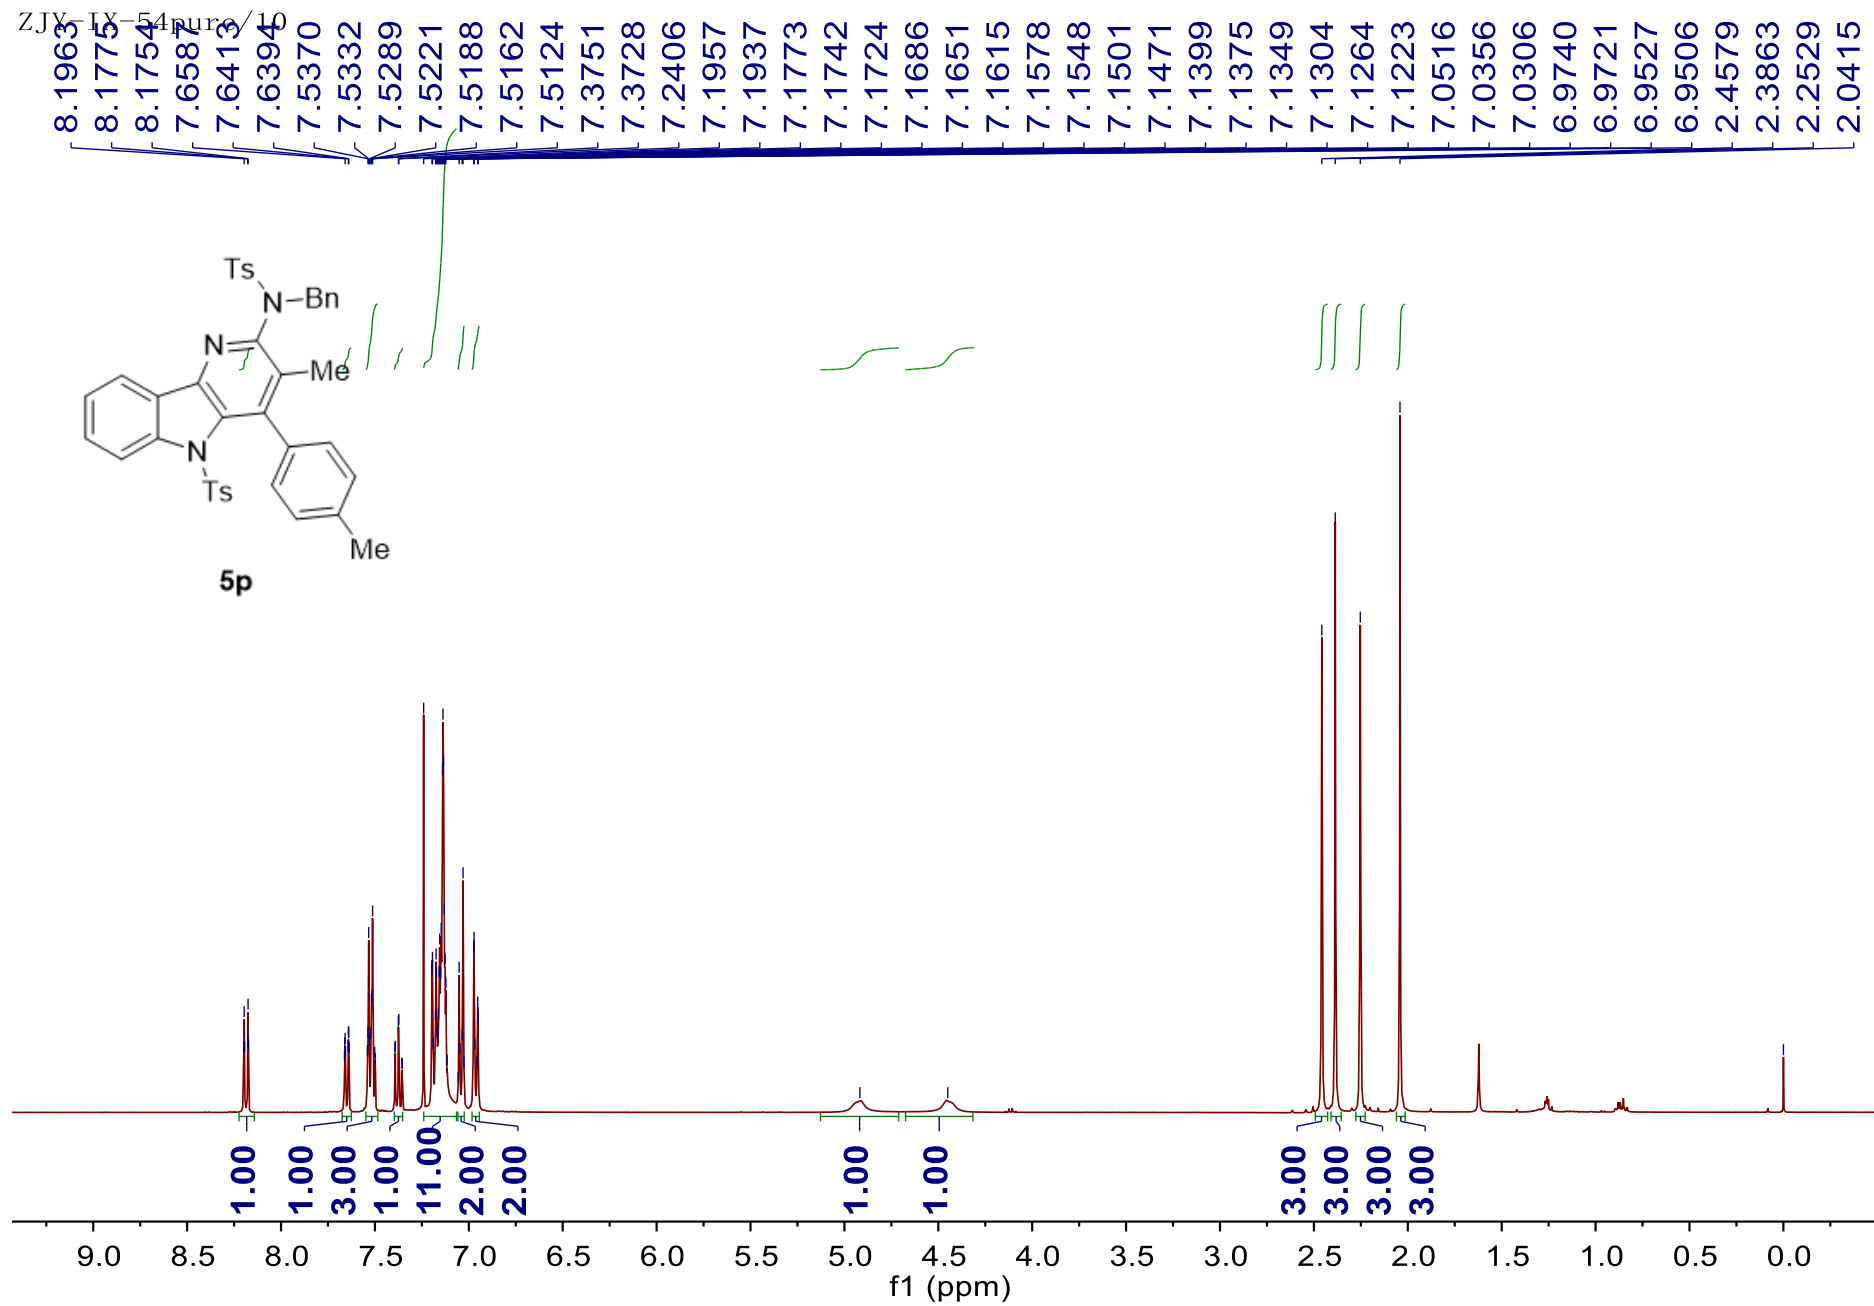

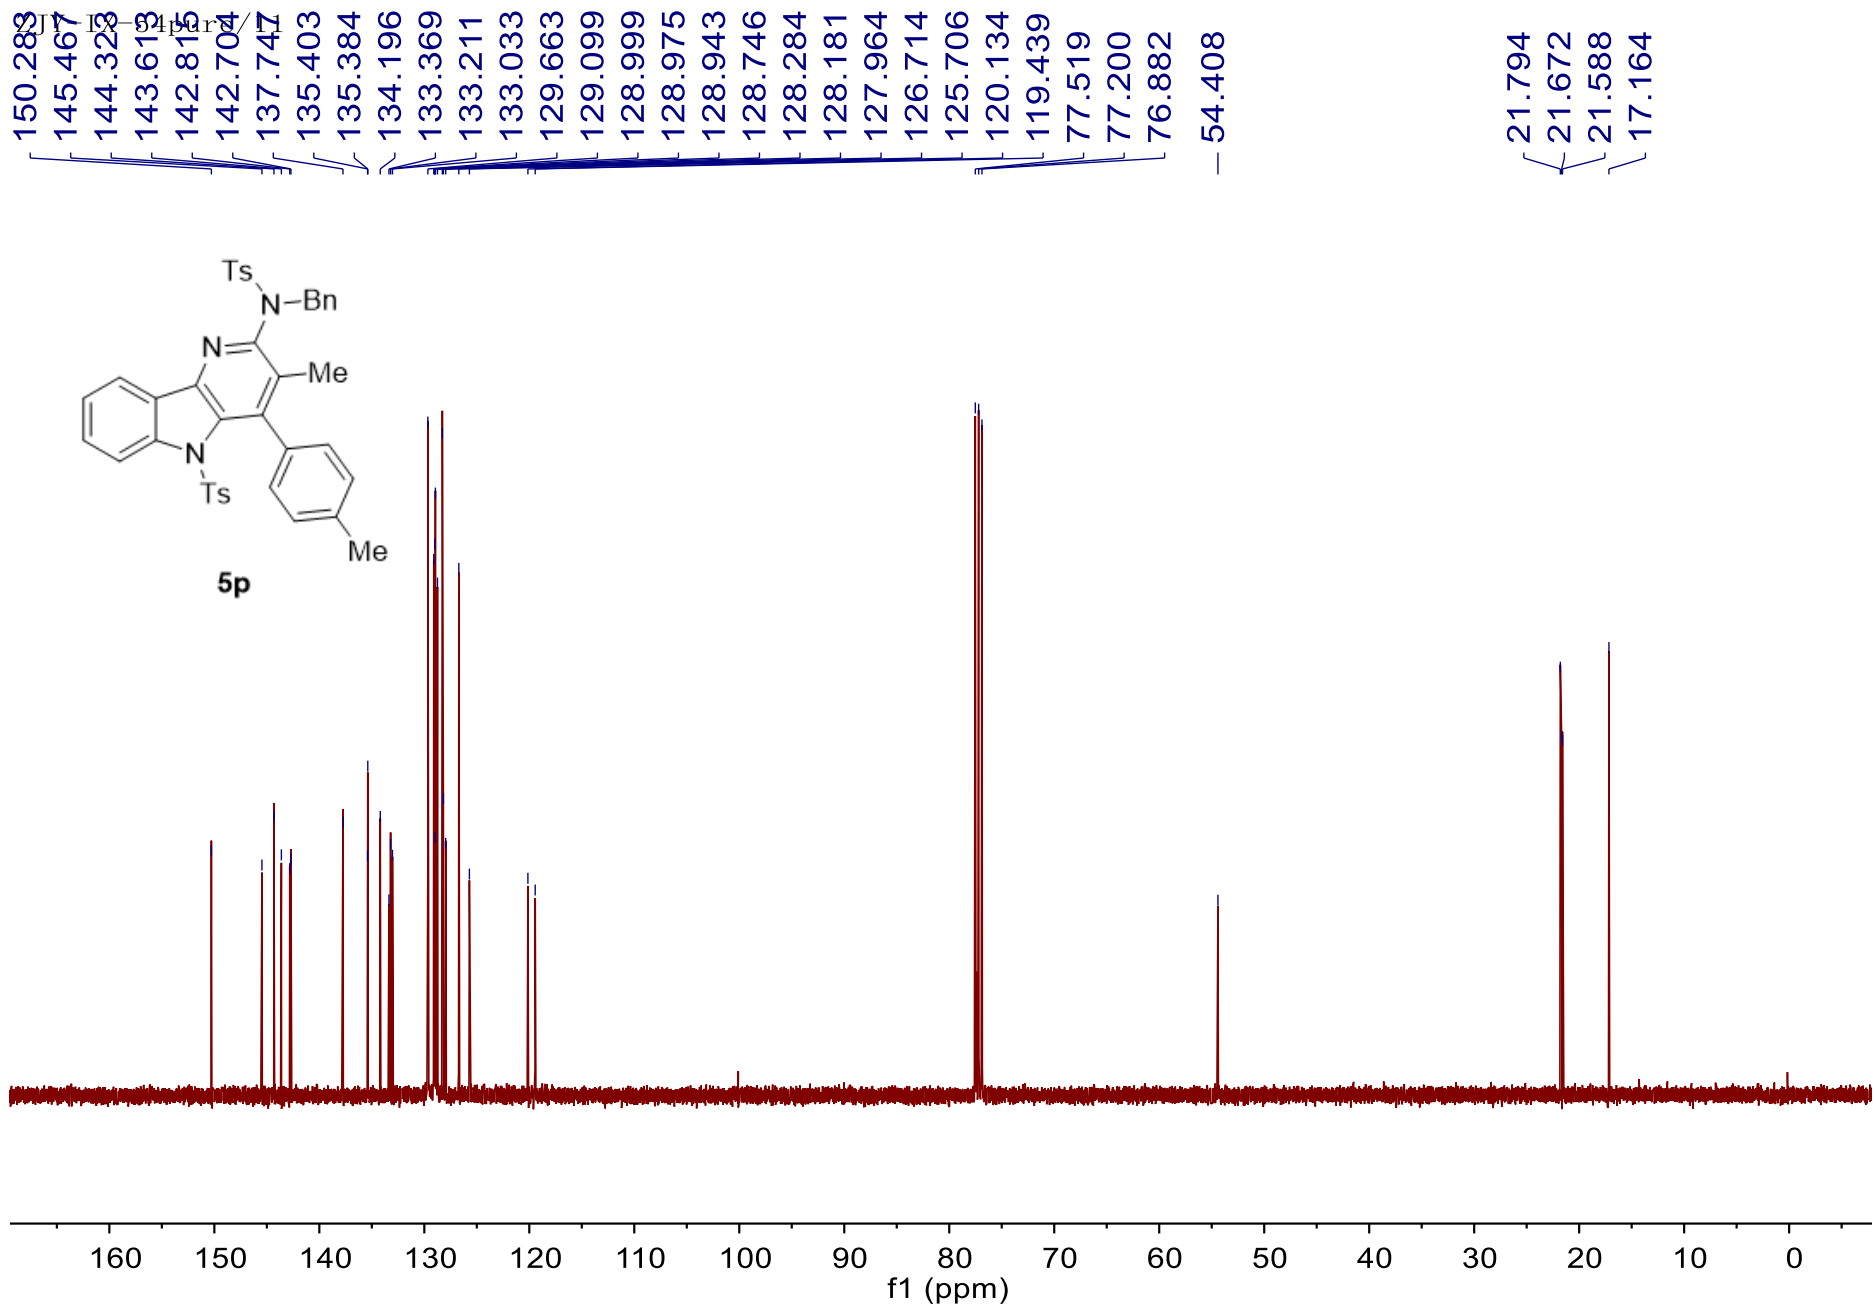

ZJY-IX-84.10.fid

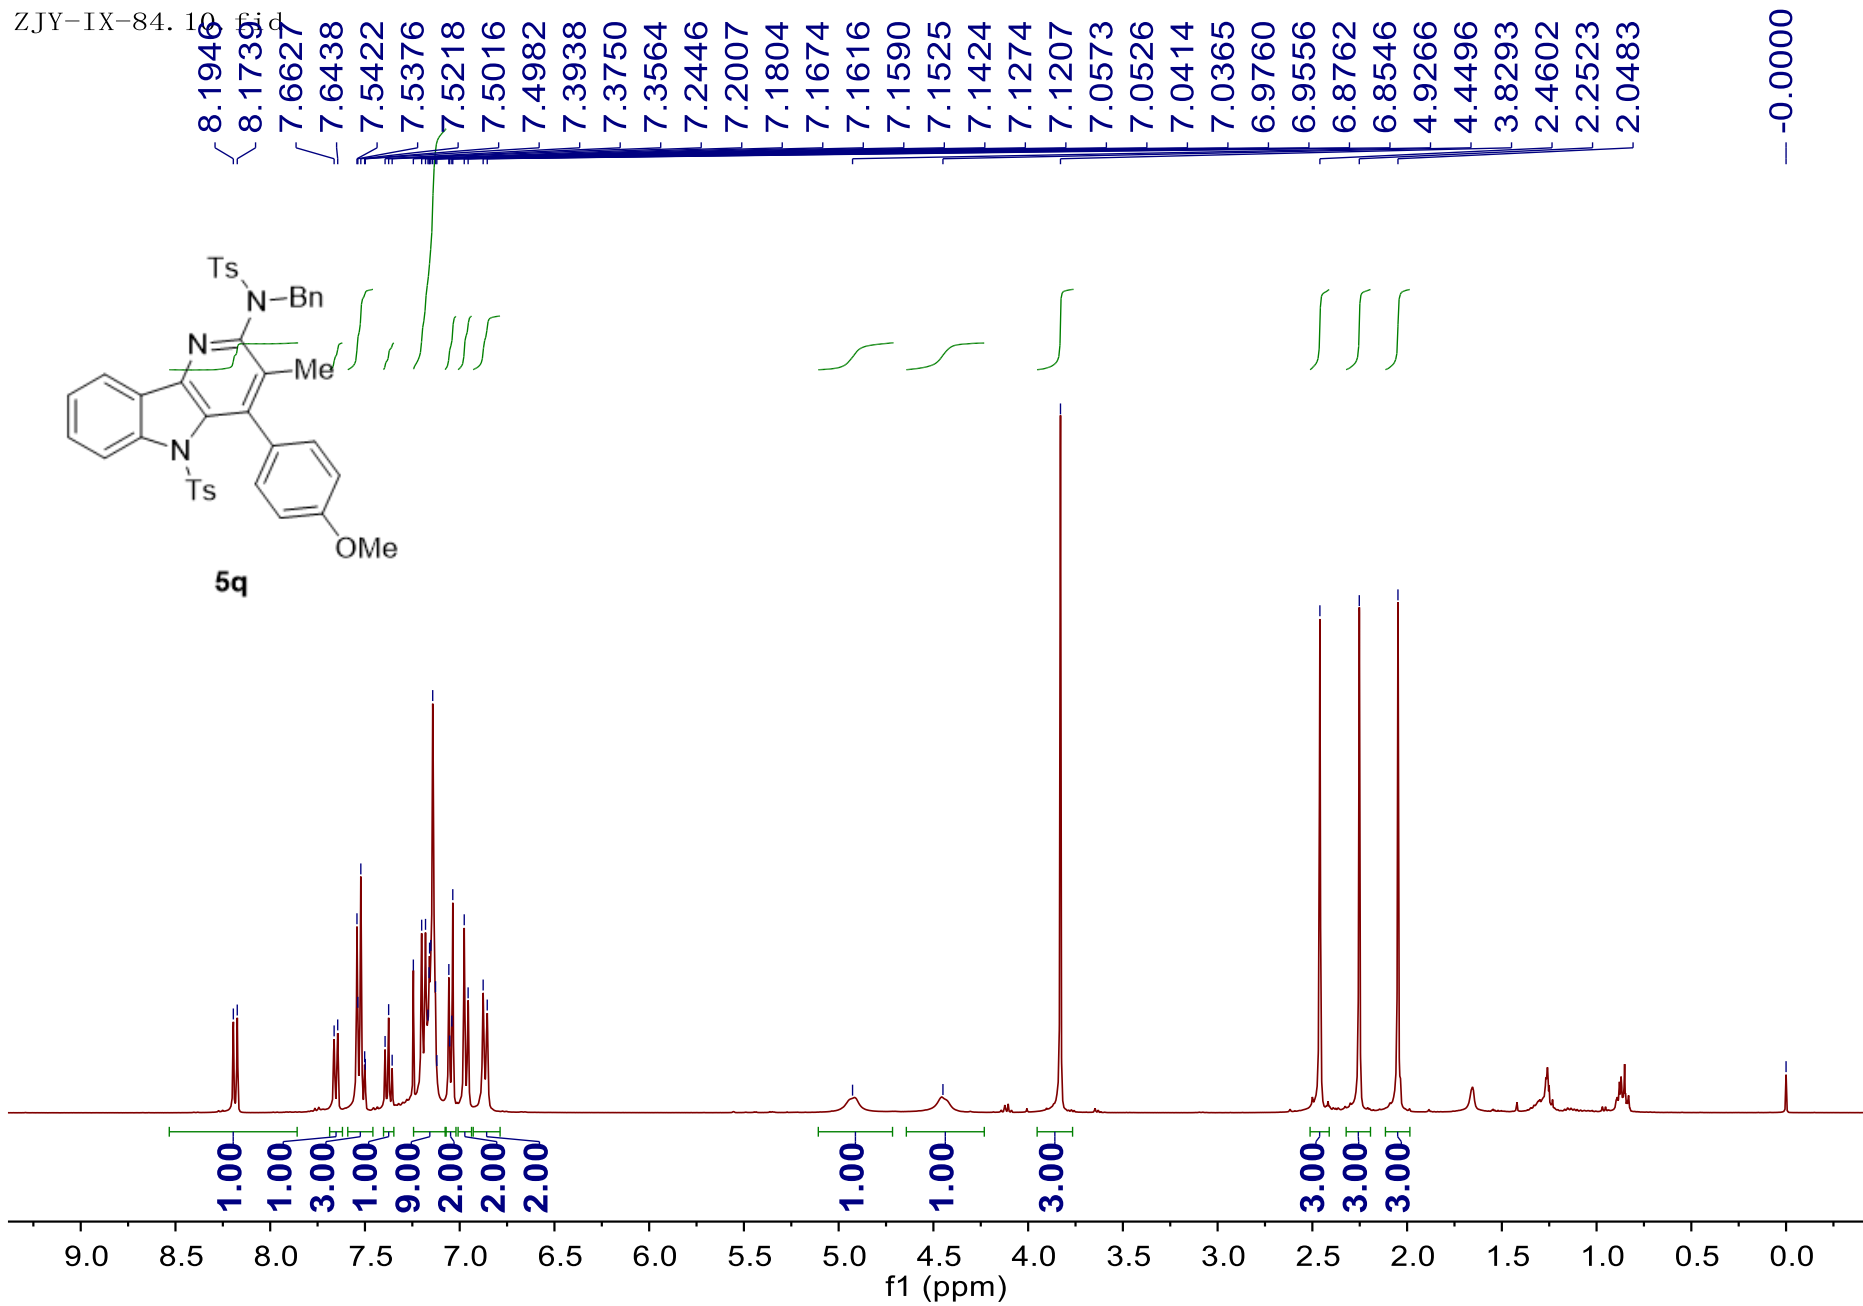

ZJY-15-84-11-11

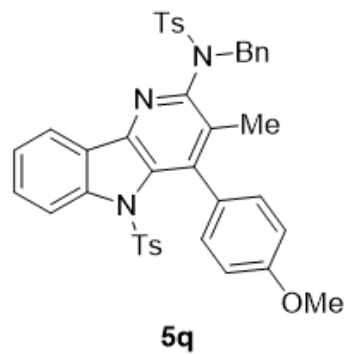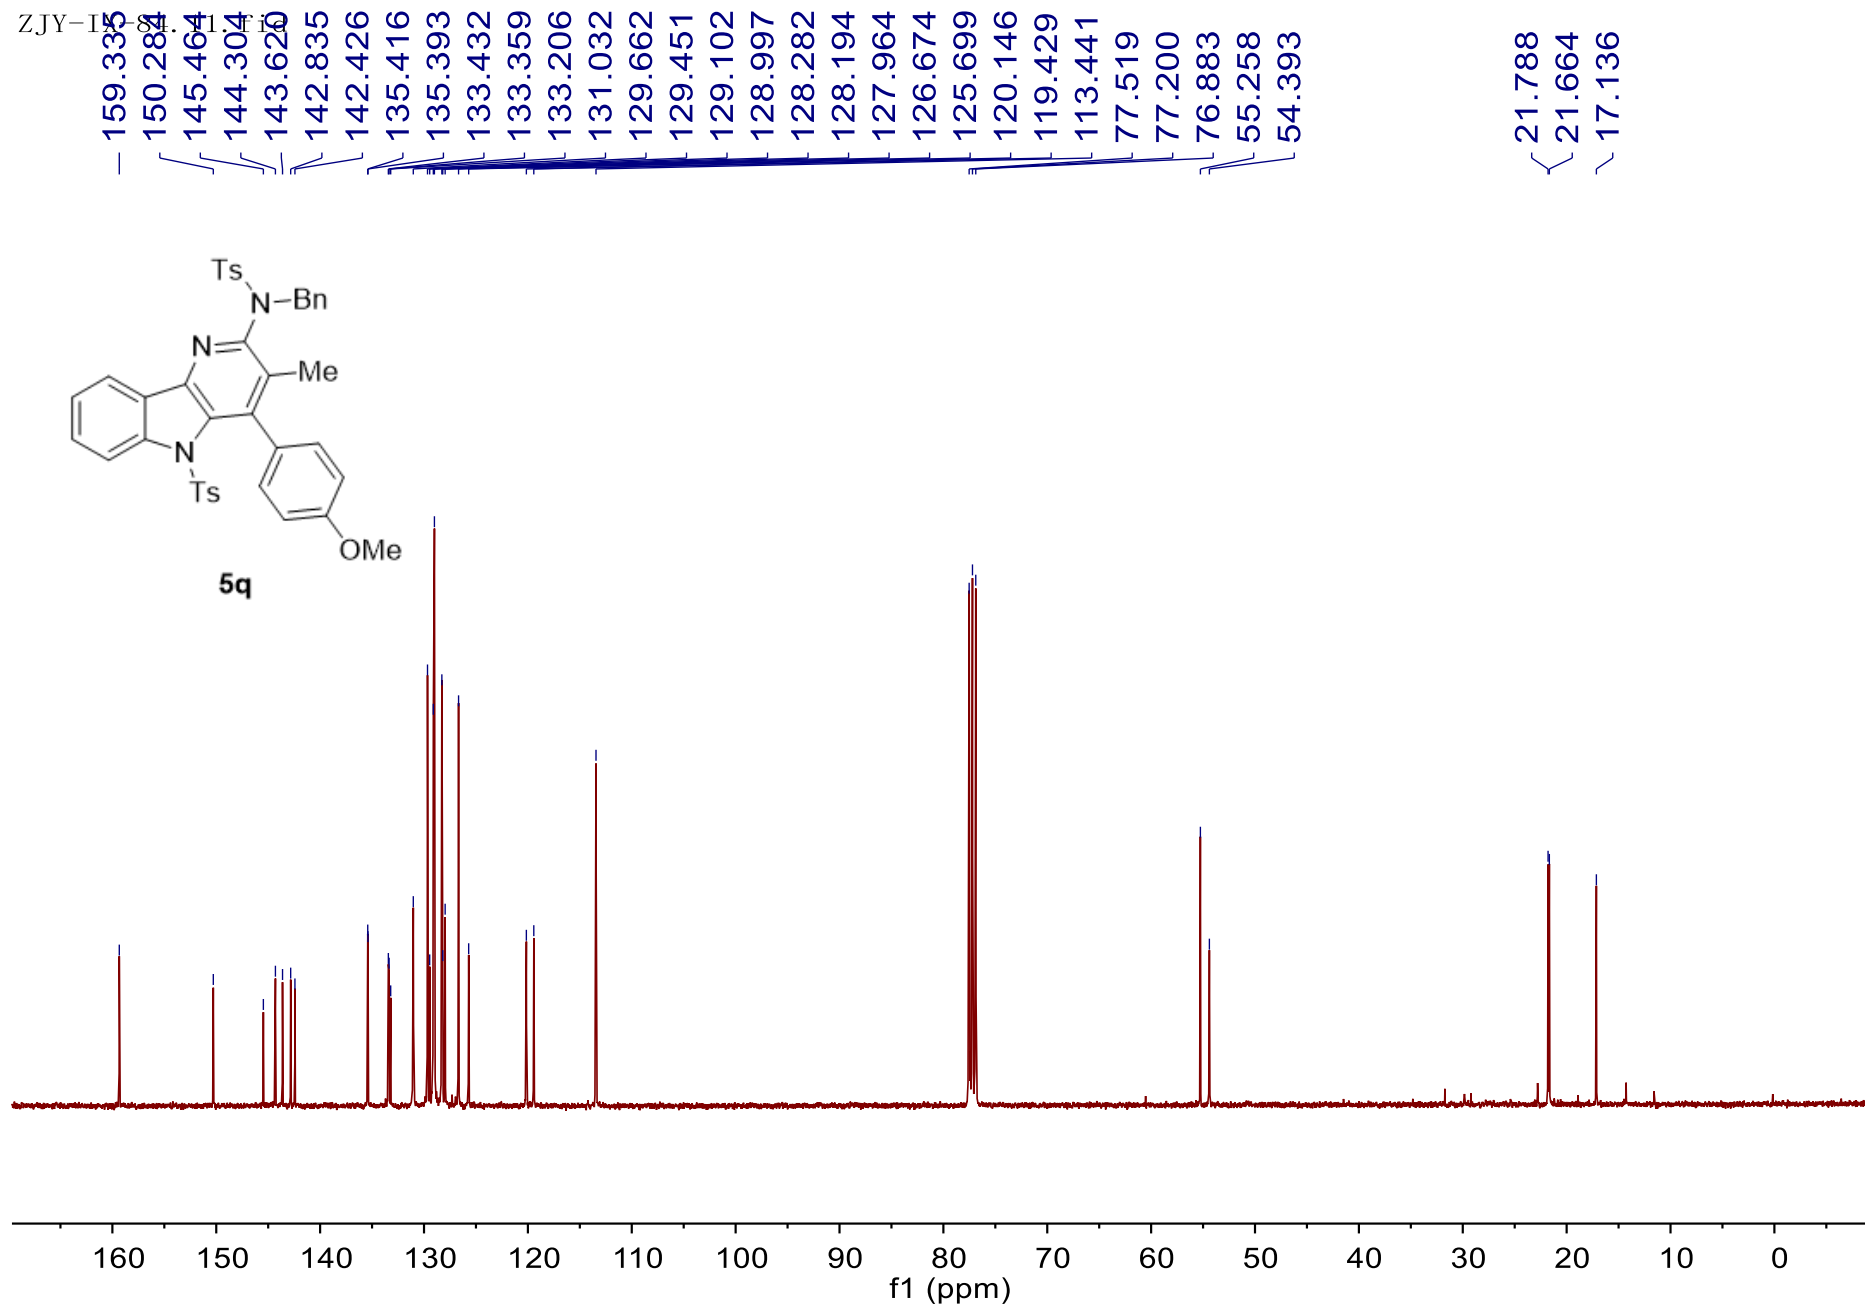

ZJY-IX-75.10 f1d

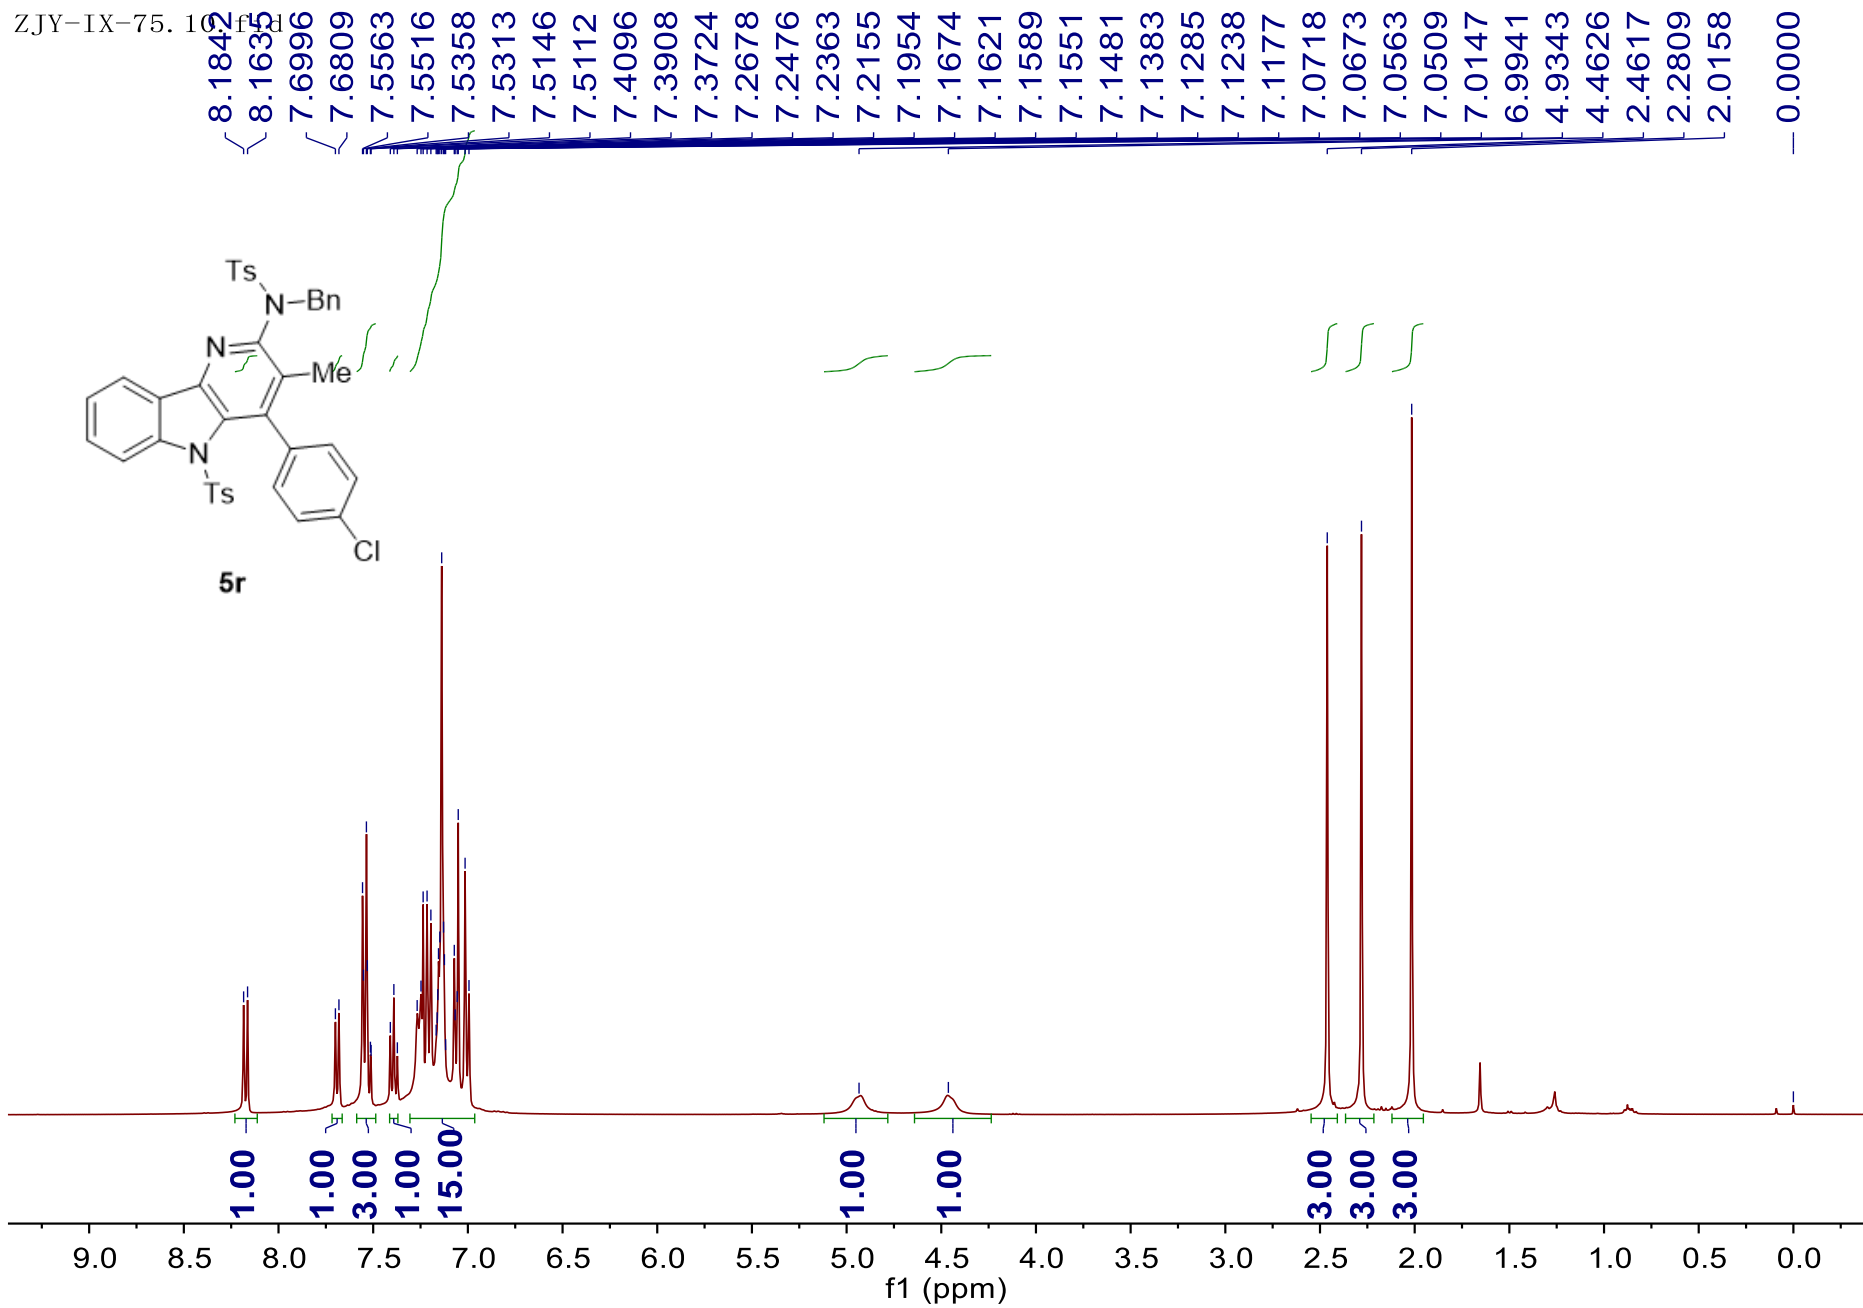



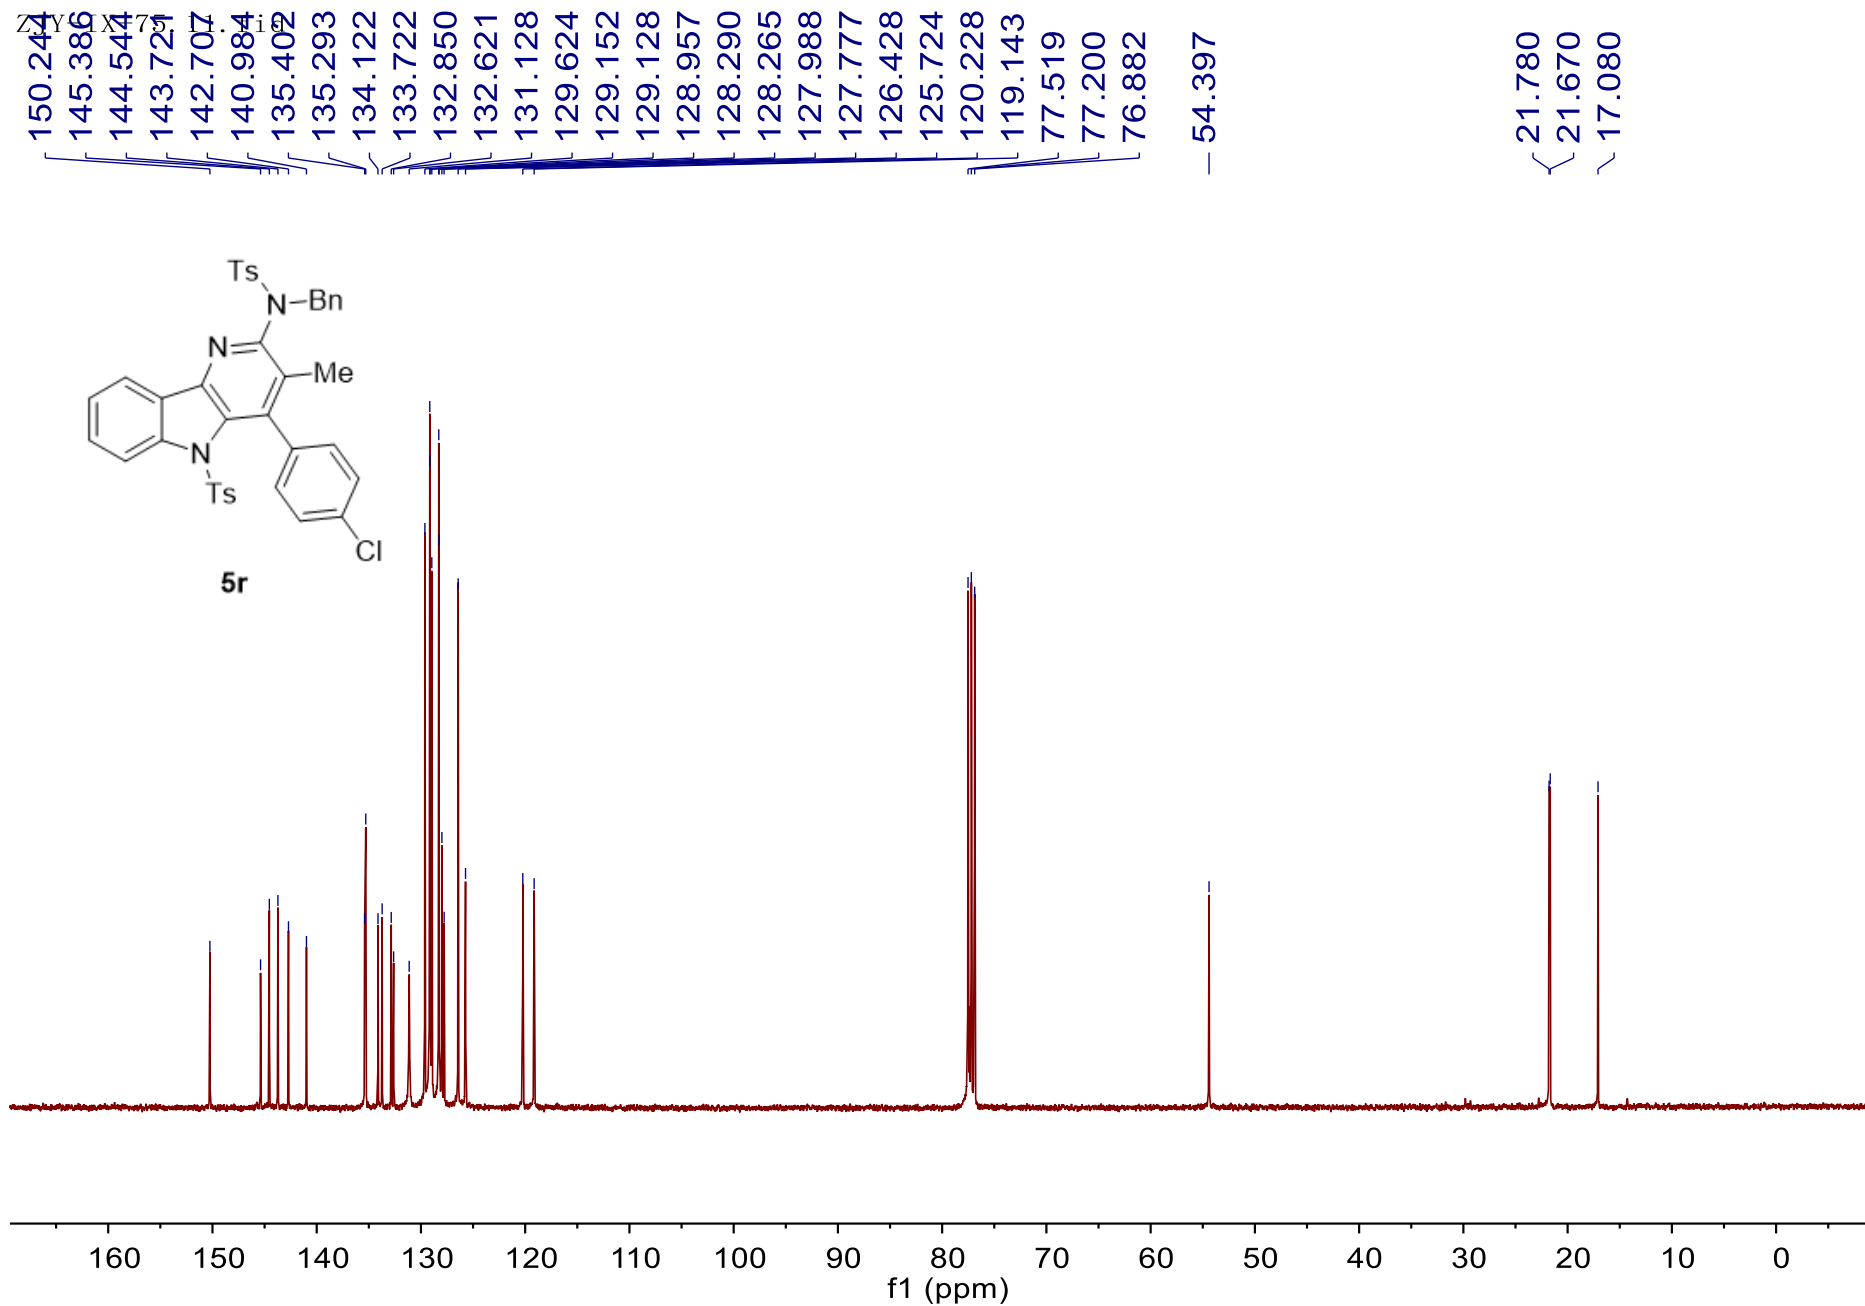

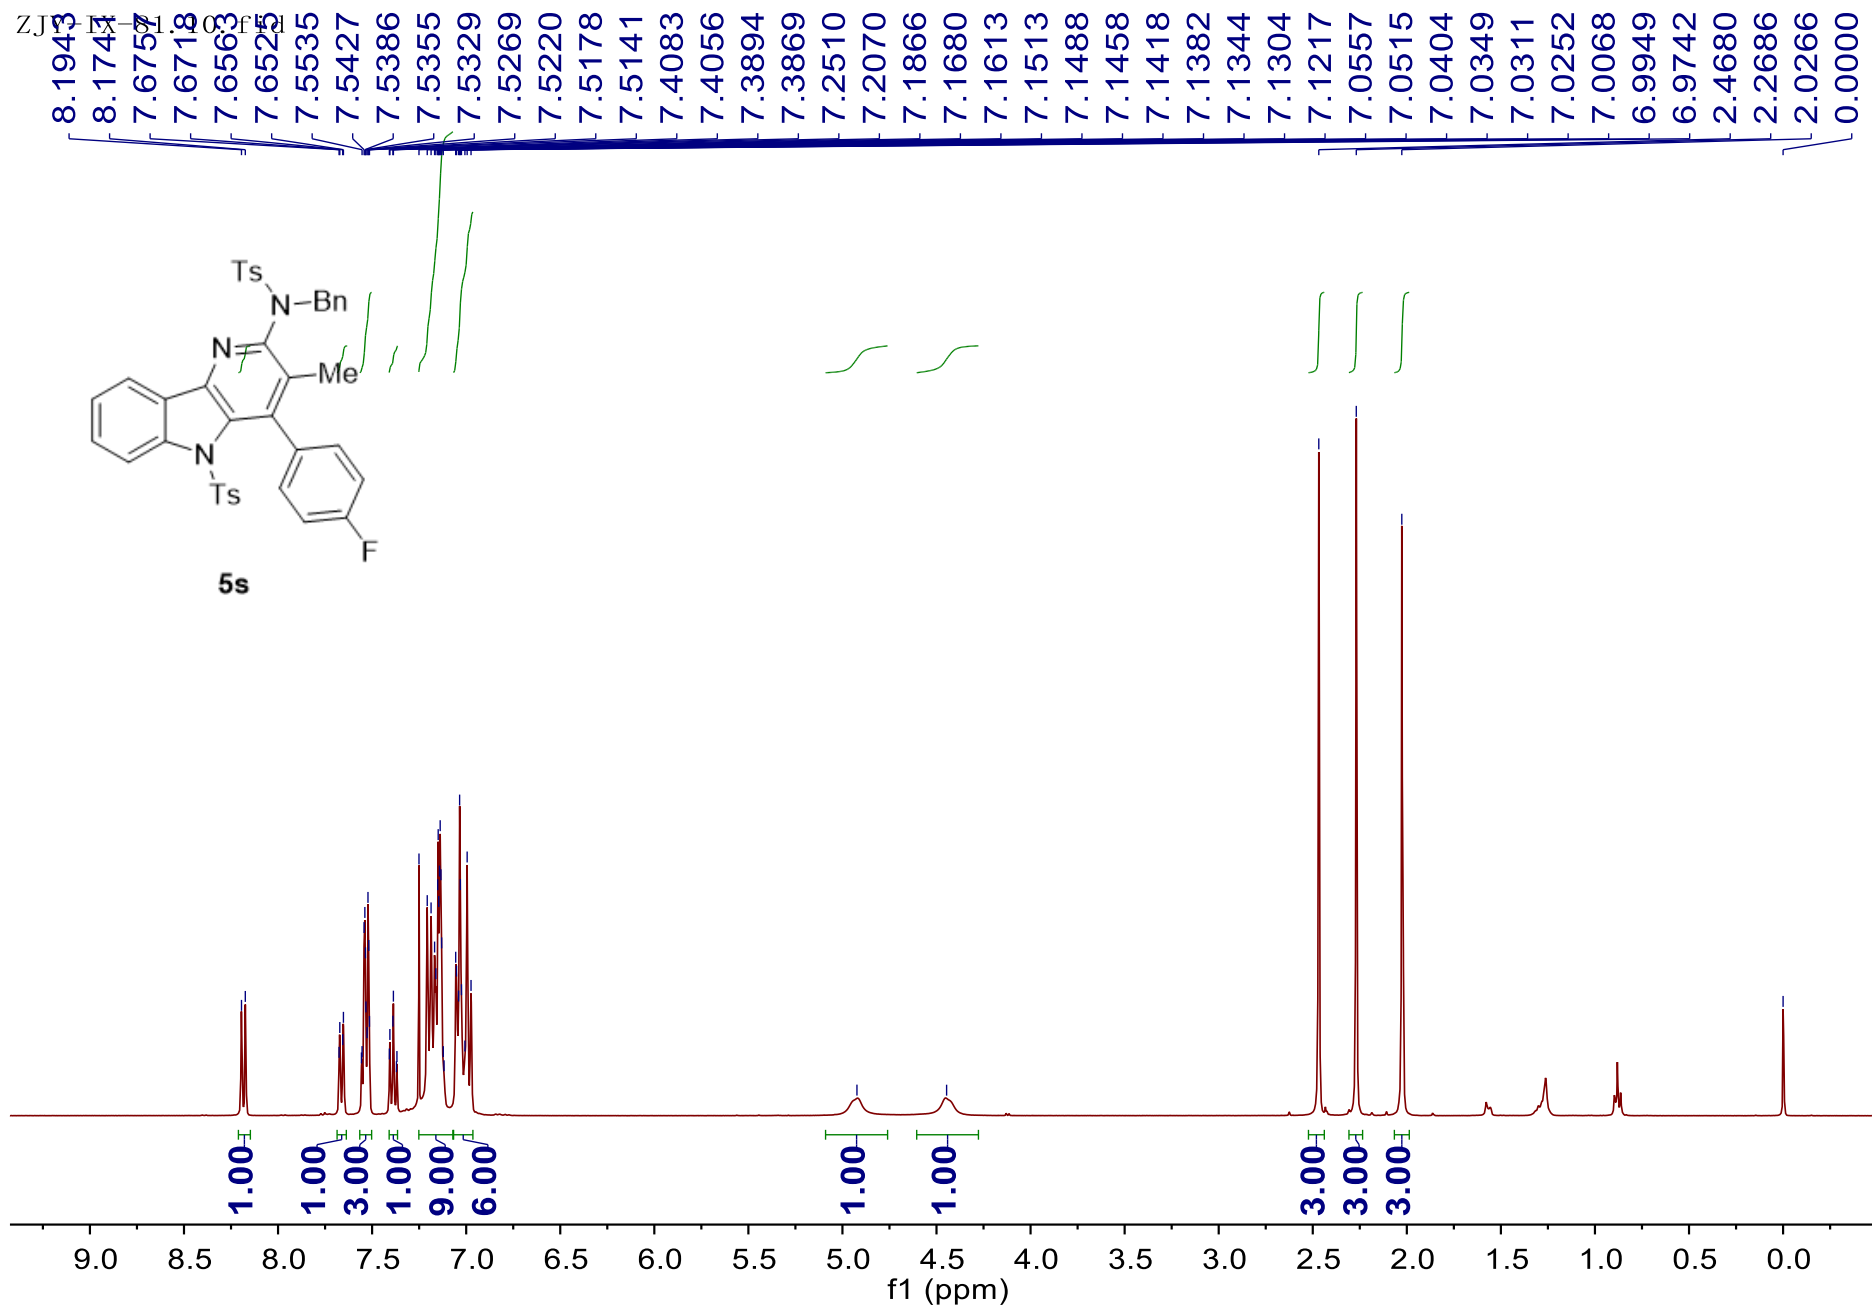



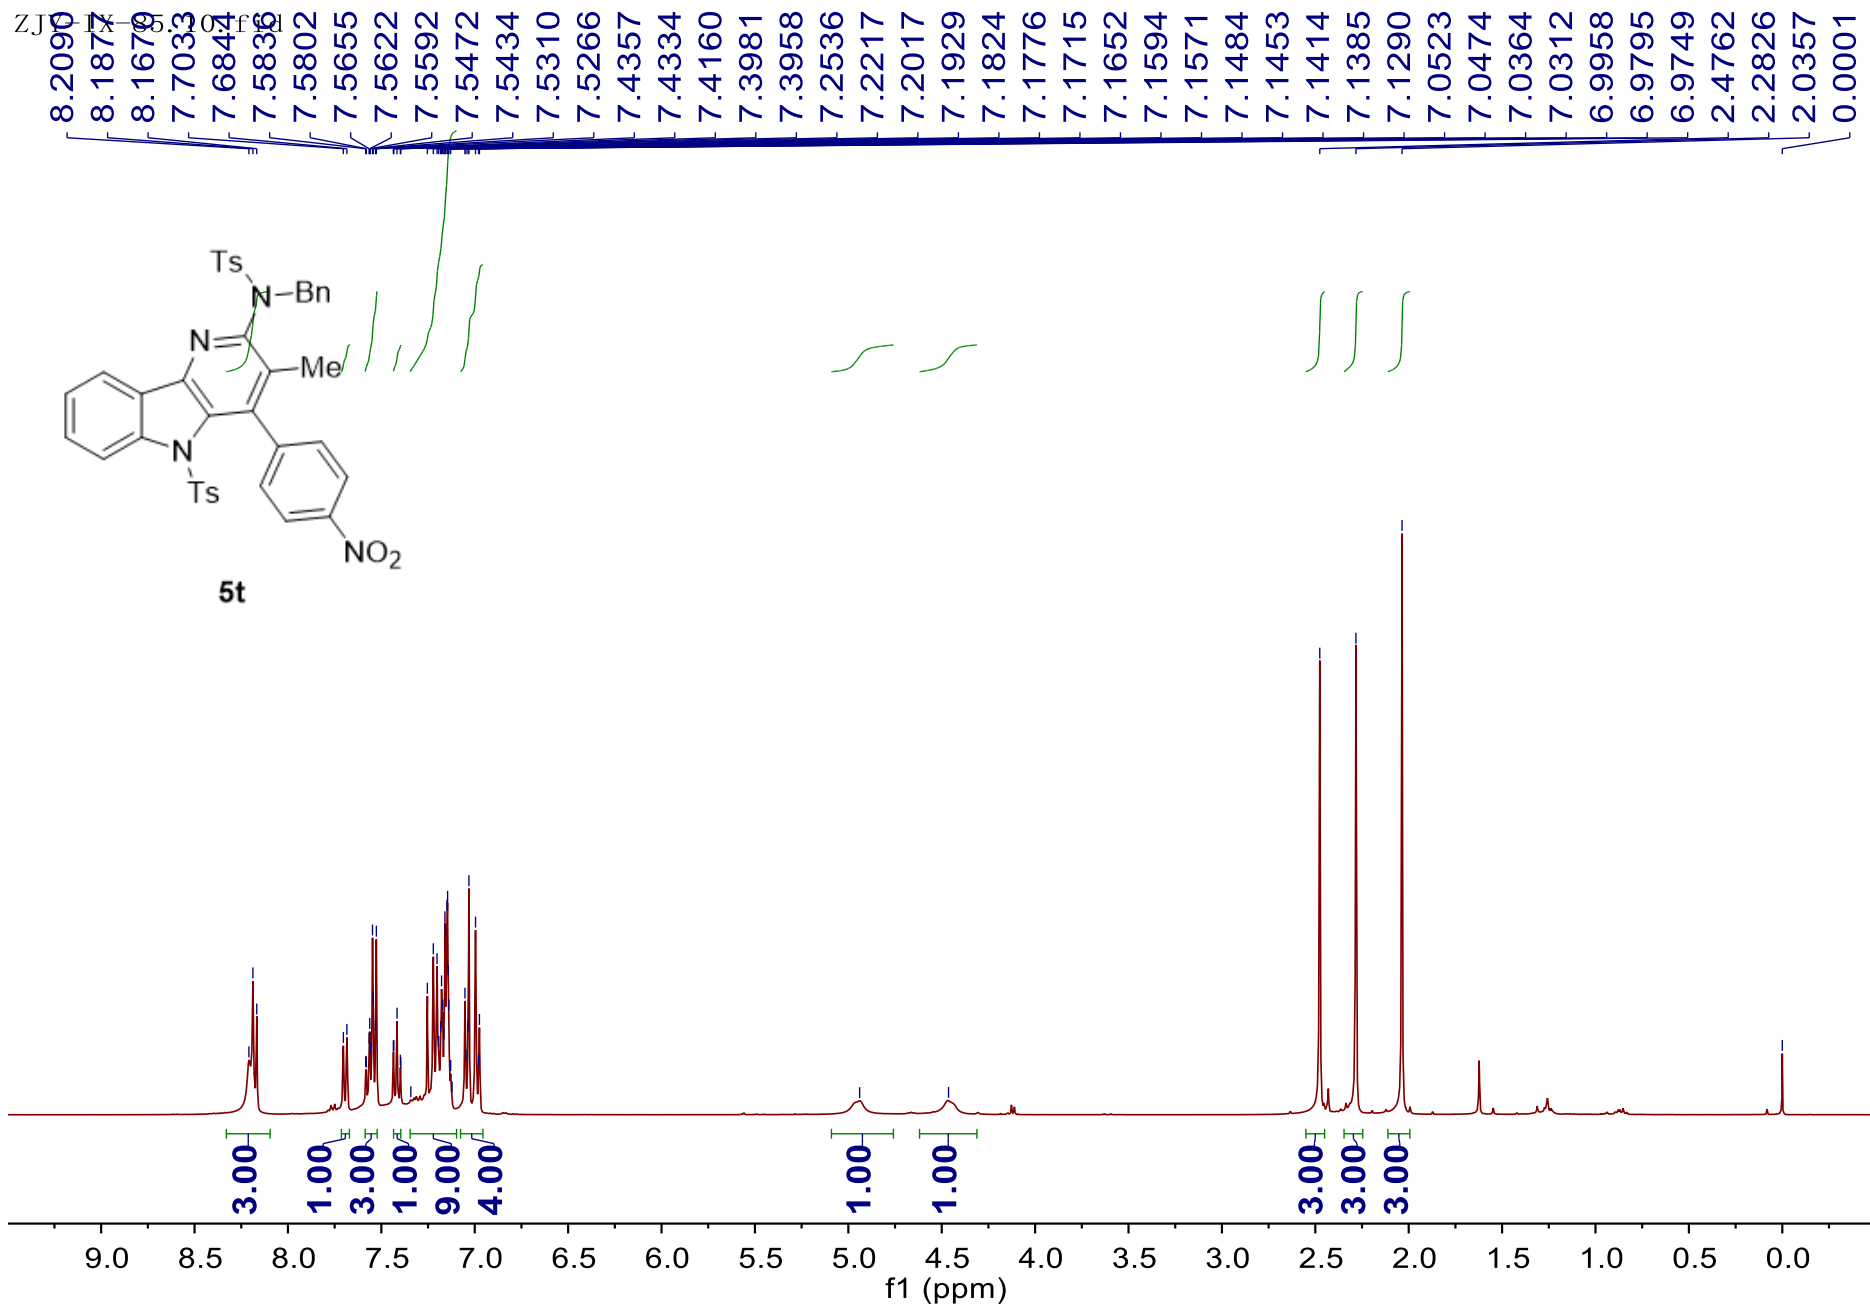

ZJY-EX-88-11c

150.578  
147.470  
145.778  
145.023  
143.891  
143.844  
142.634  
139.874  
135.211  
135.147  
133.181  
132.212  
132.163  
130.867  
129.660  
129.505  
129.226  
129.194  
128.960  
128.370  
128.108  
127.706  
126.559  
126.049  
123.379  
120.354  
119.211  
77.518  
77.200  
76.882  
54.396

21.814  
21.687  
17.196

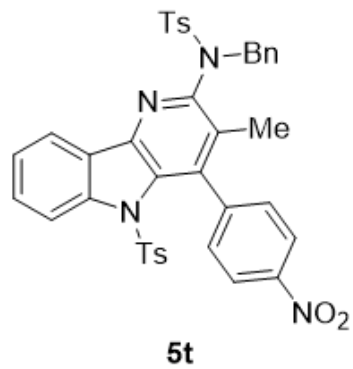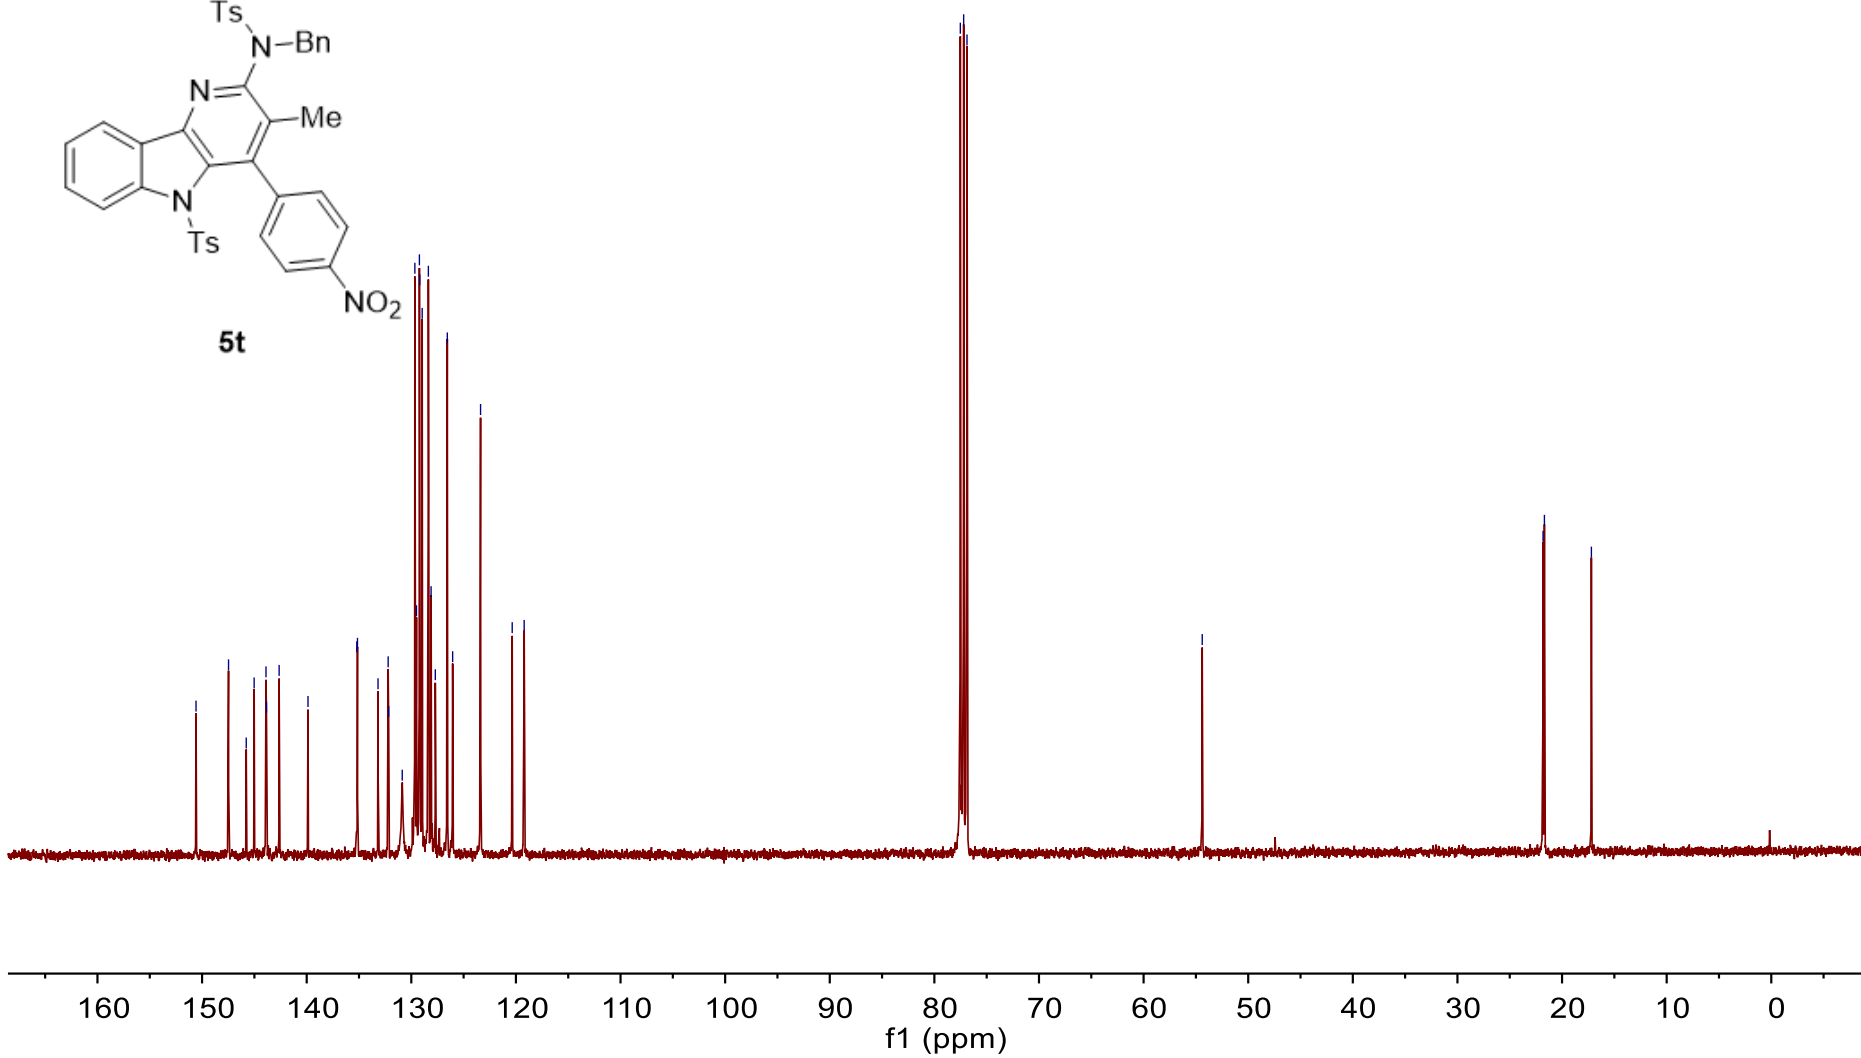

S160

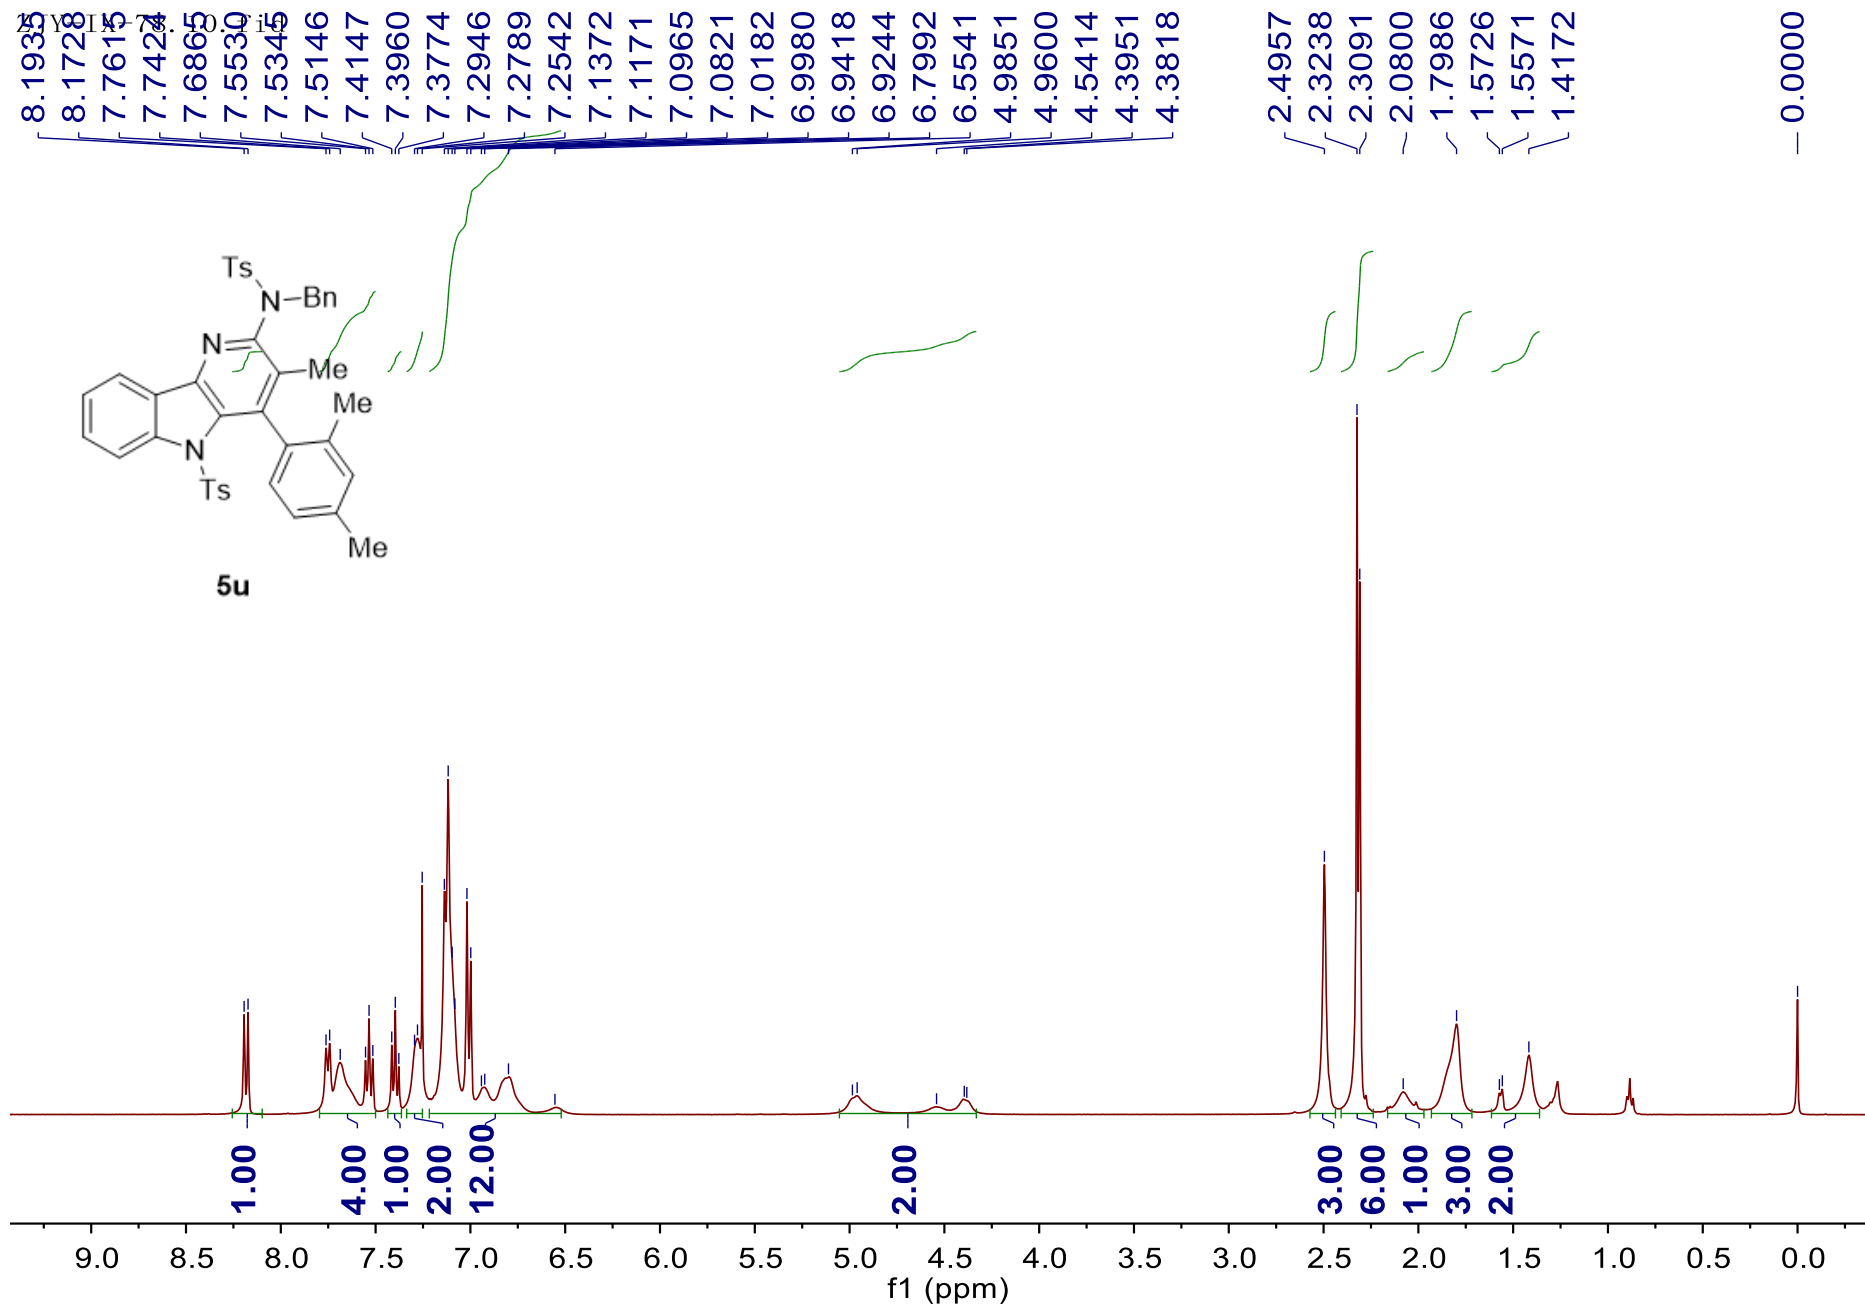

149.632  
144.409  
144.101  
143.635  
142.495  
137.802  
135.593  
135.189  
133.990  
132.966  
130.515  
129.856  
129.226  
129.092  
128.937  
127.941  
127.344  
126.186  
126.010  
125.152  
120.266  
118.474  
77.518  
77.200  
76.883

21.848  
21.731  
21.450  
16.554

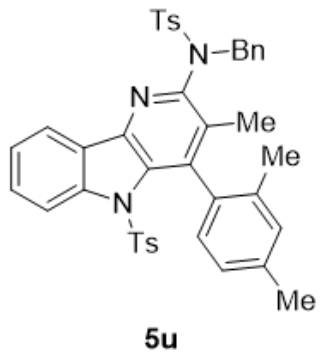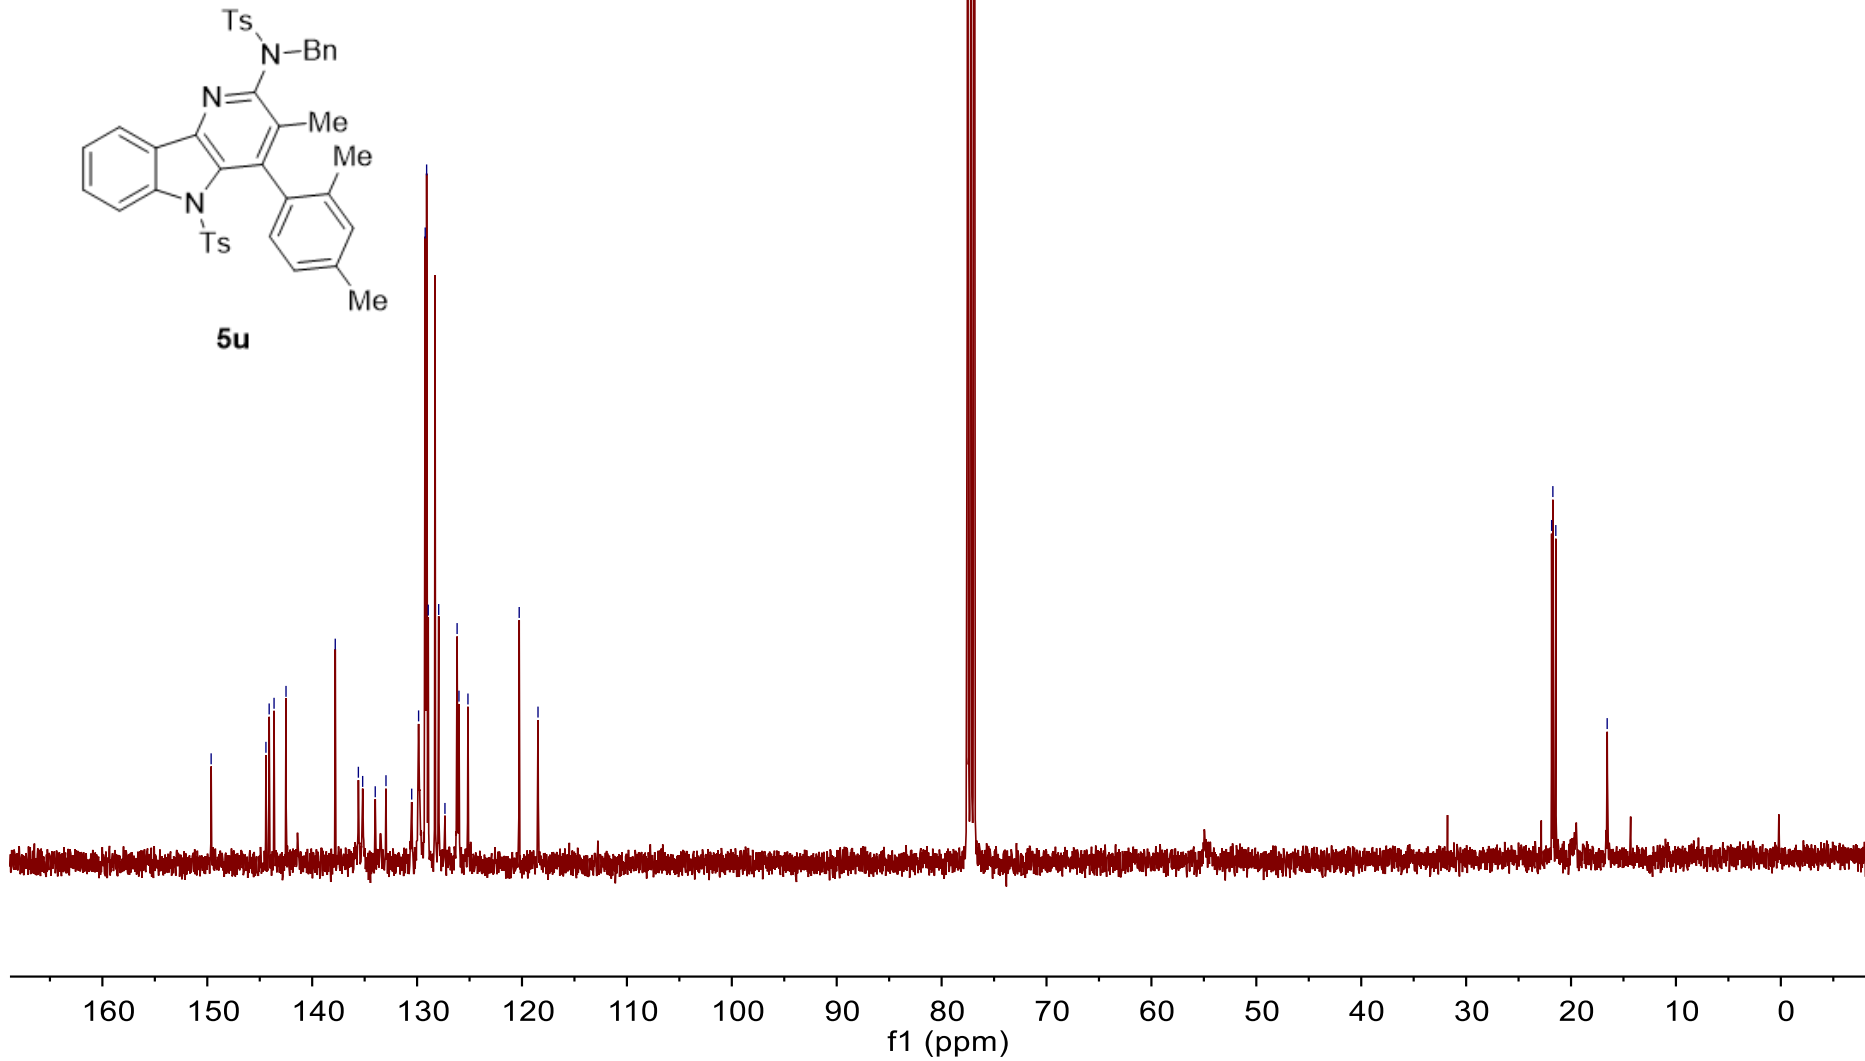

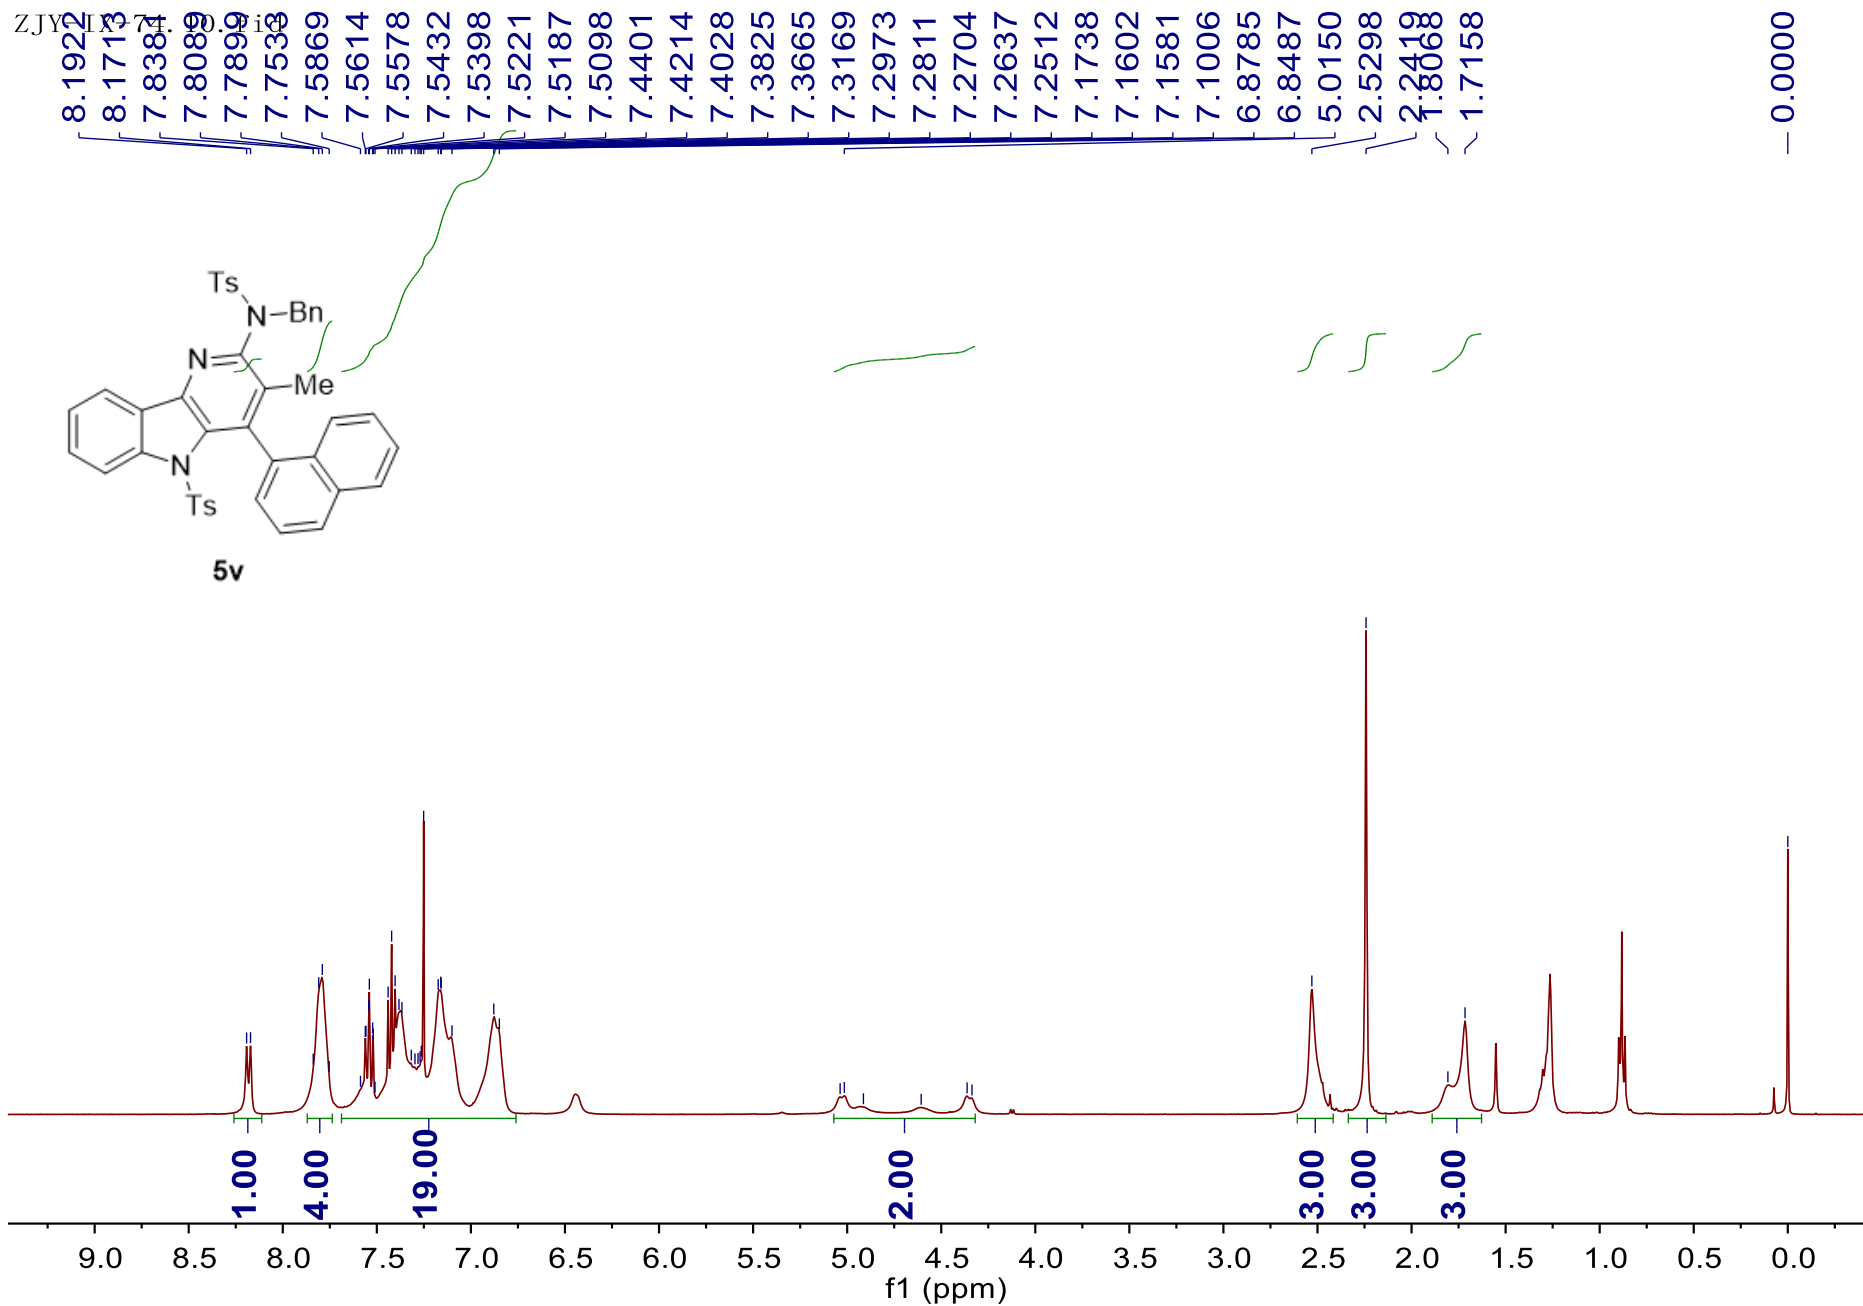



ZJY-IX-74.13

149.713  
143.746  
142.573  
129.275  
129.134  
129.031  
128.837  
128.641  
128.356  
127.988

77.518  
77.200  
76.883

21.881  
21.670

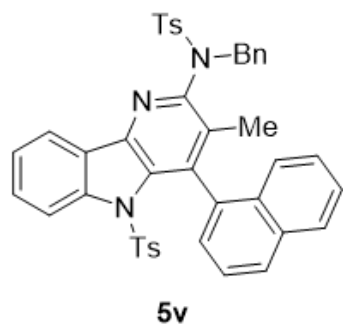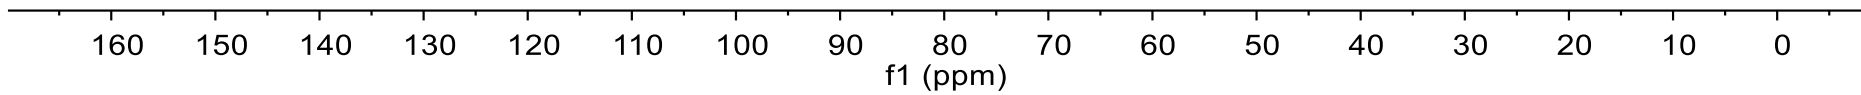

S164

ZJY-IX-64\_10.fid

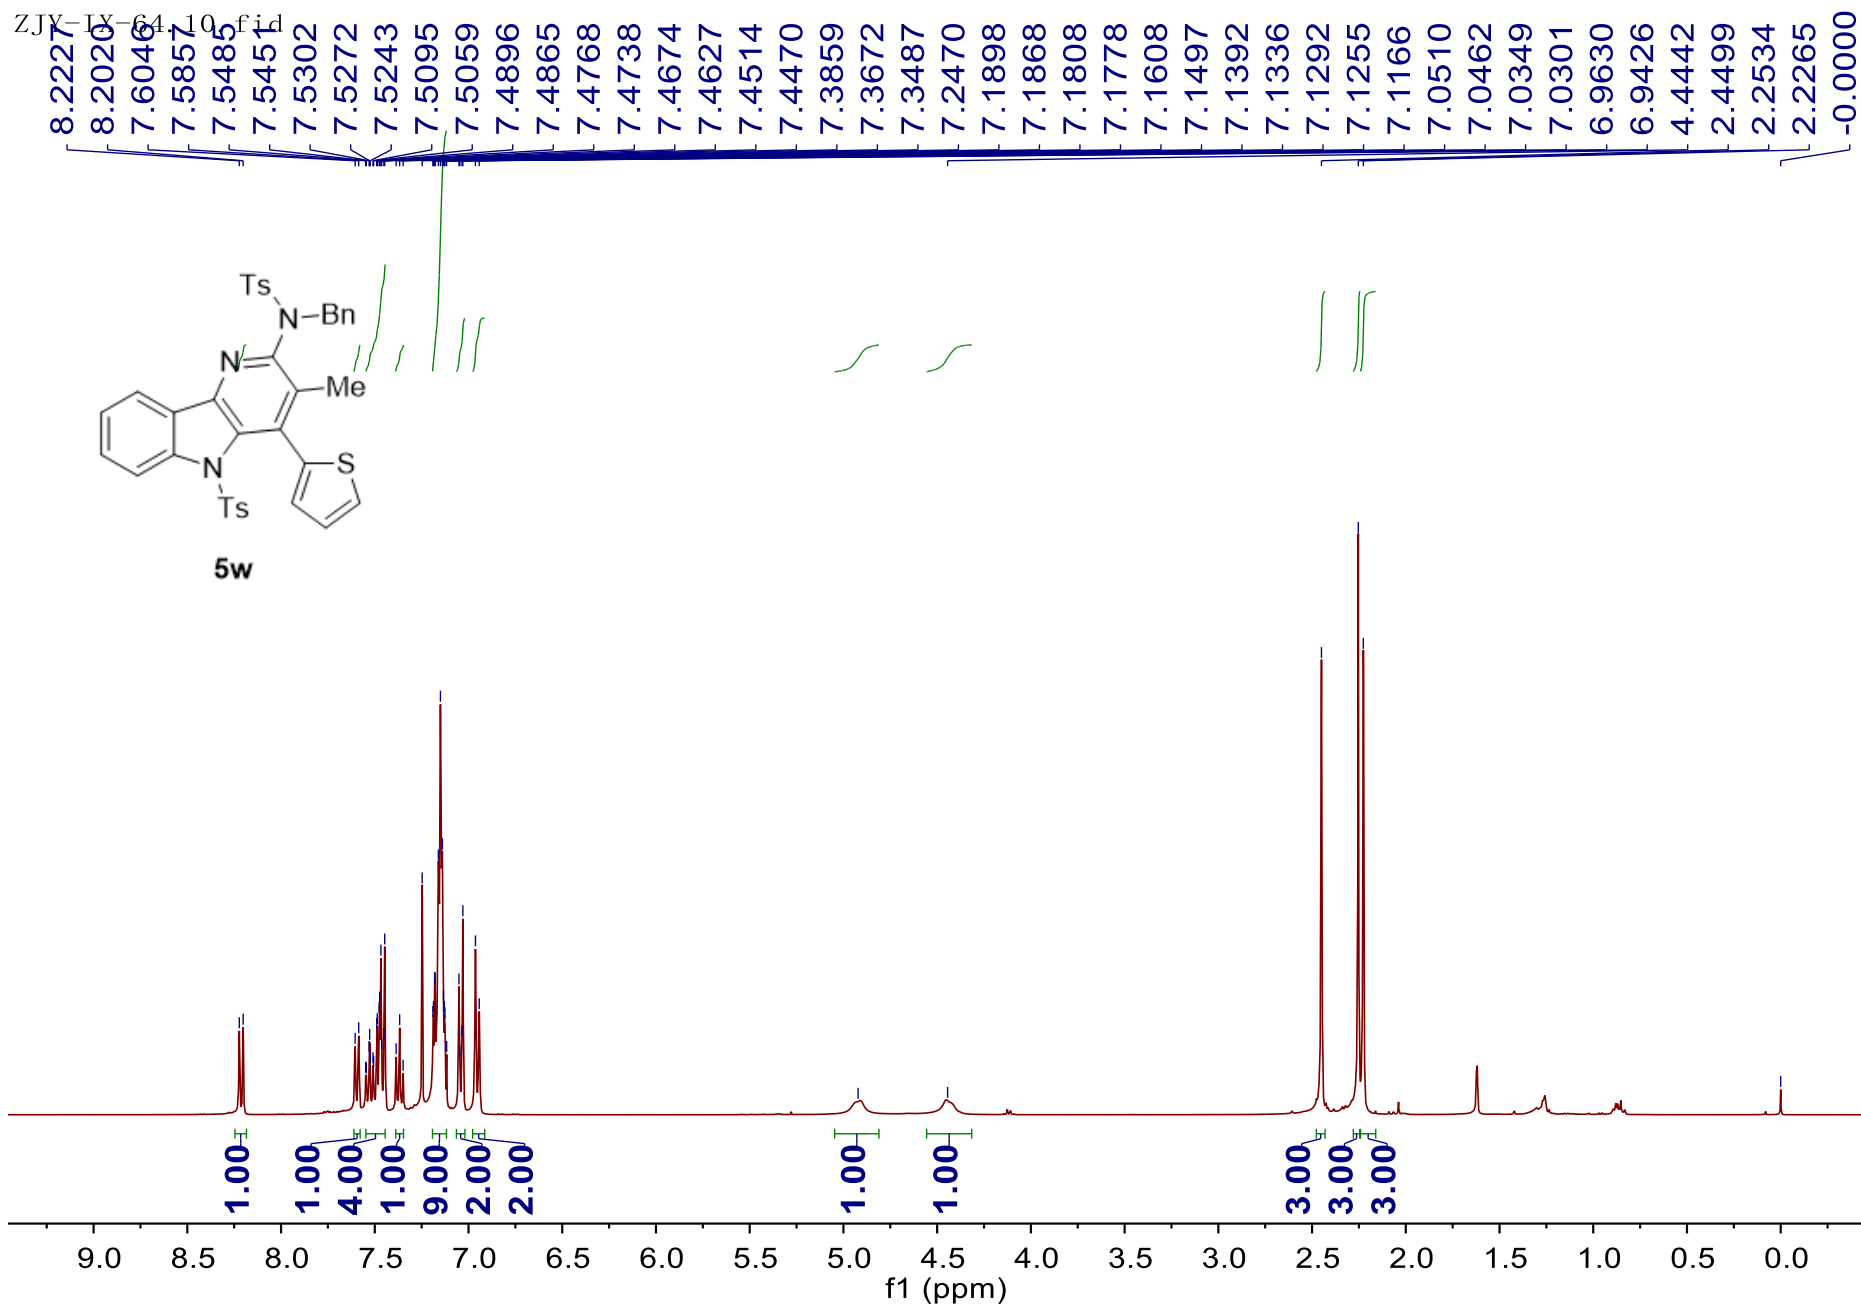

ZJY-LX669

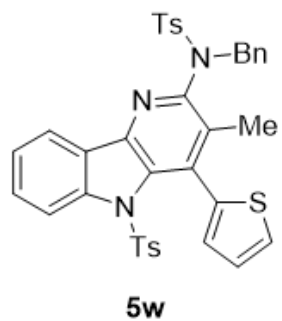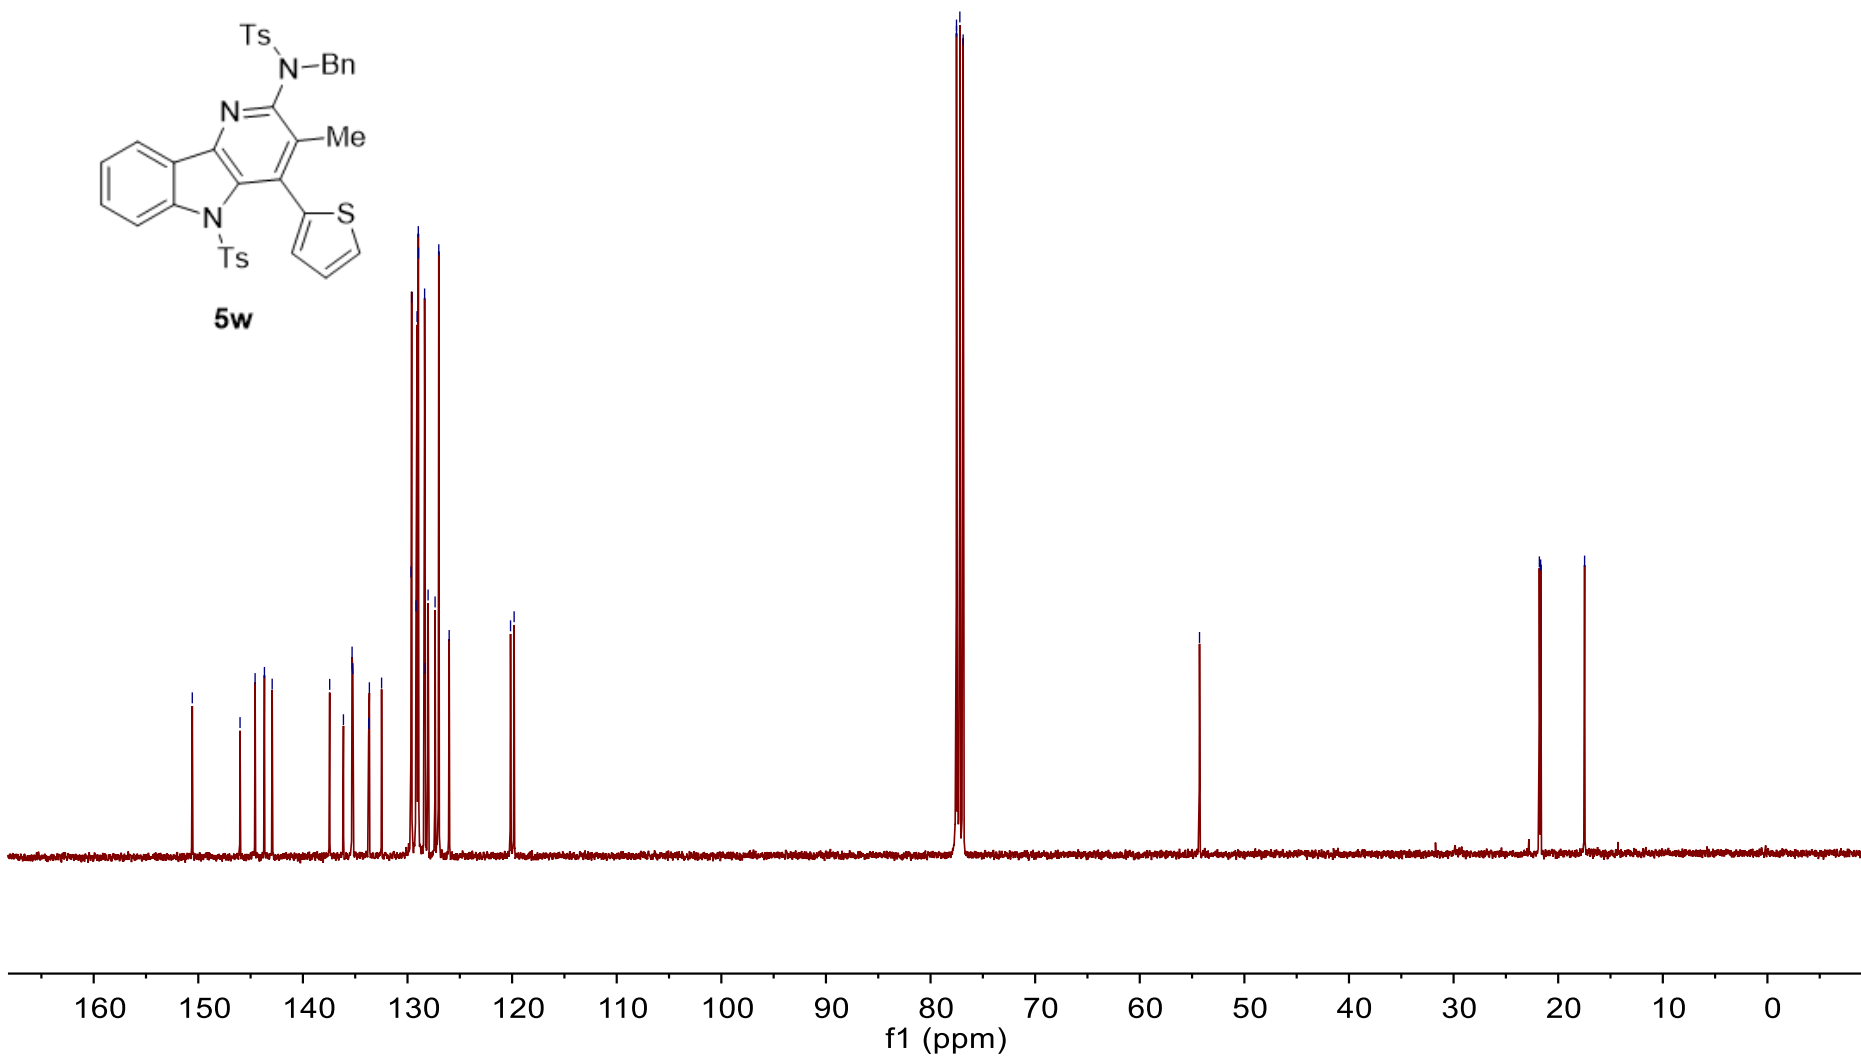

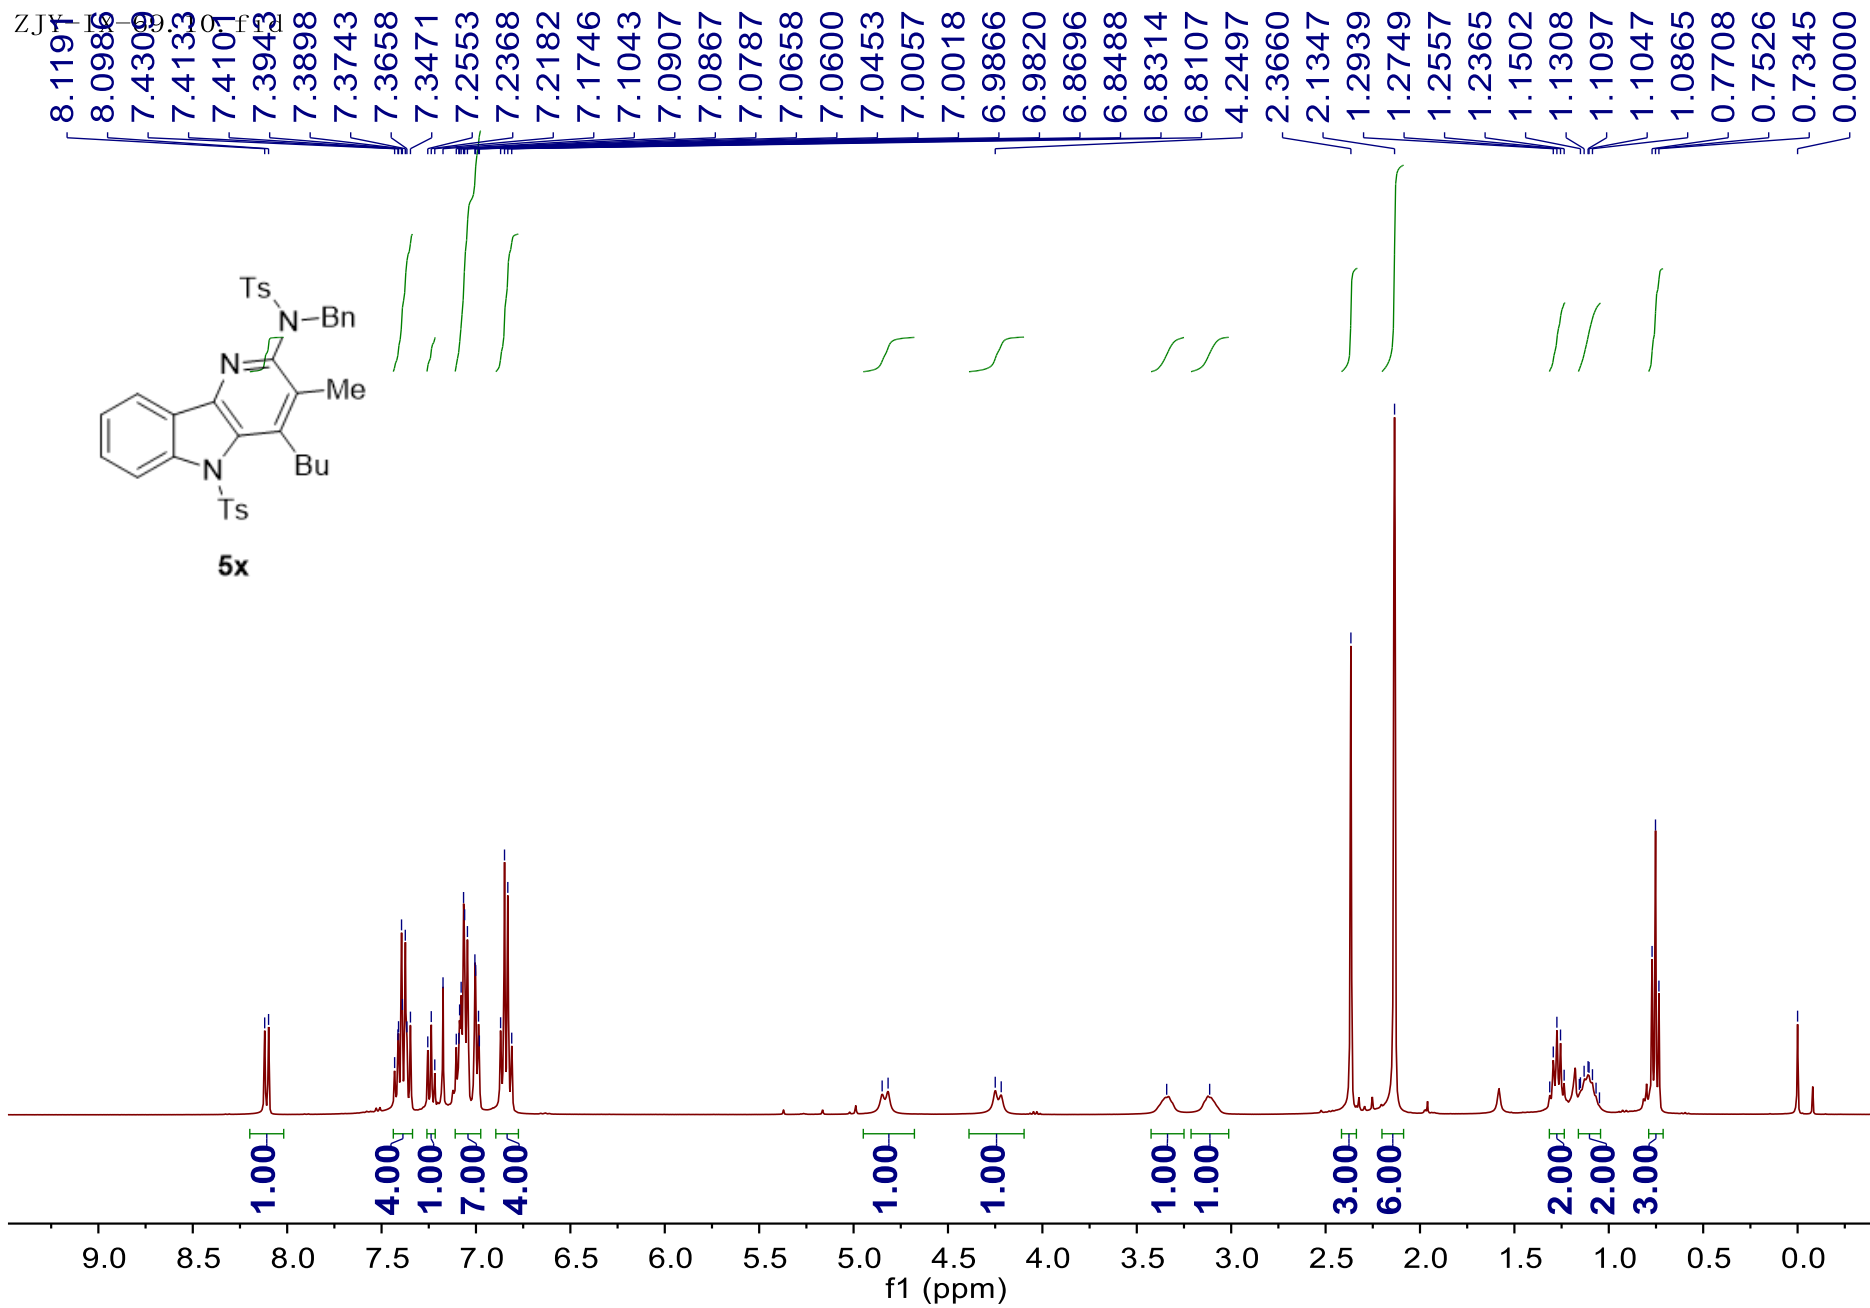

ZJY-6912

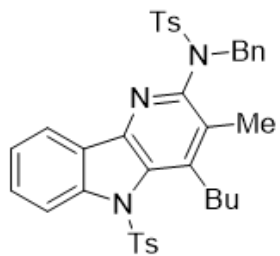

5x

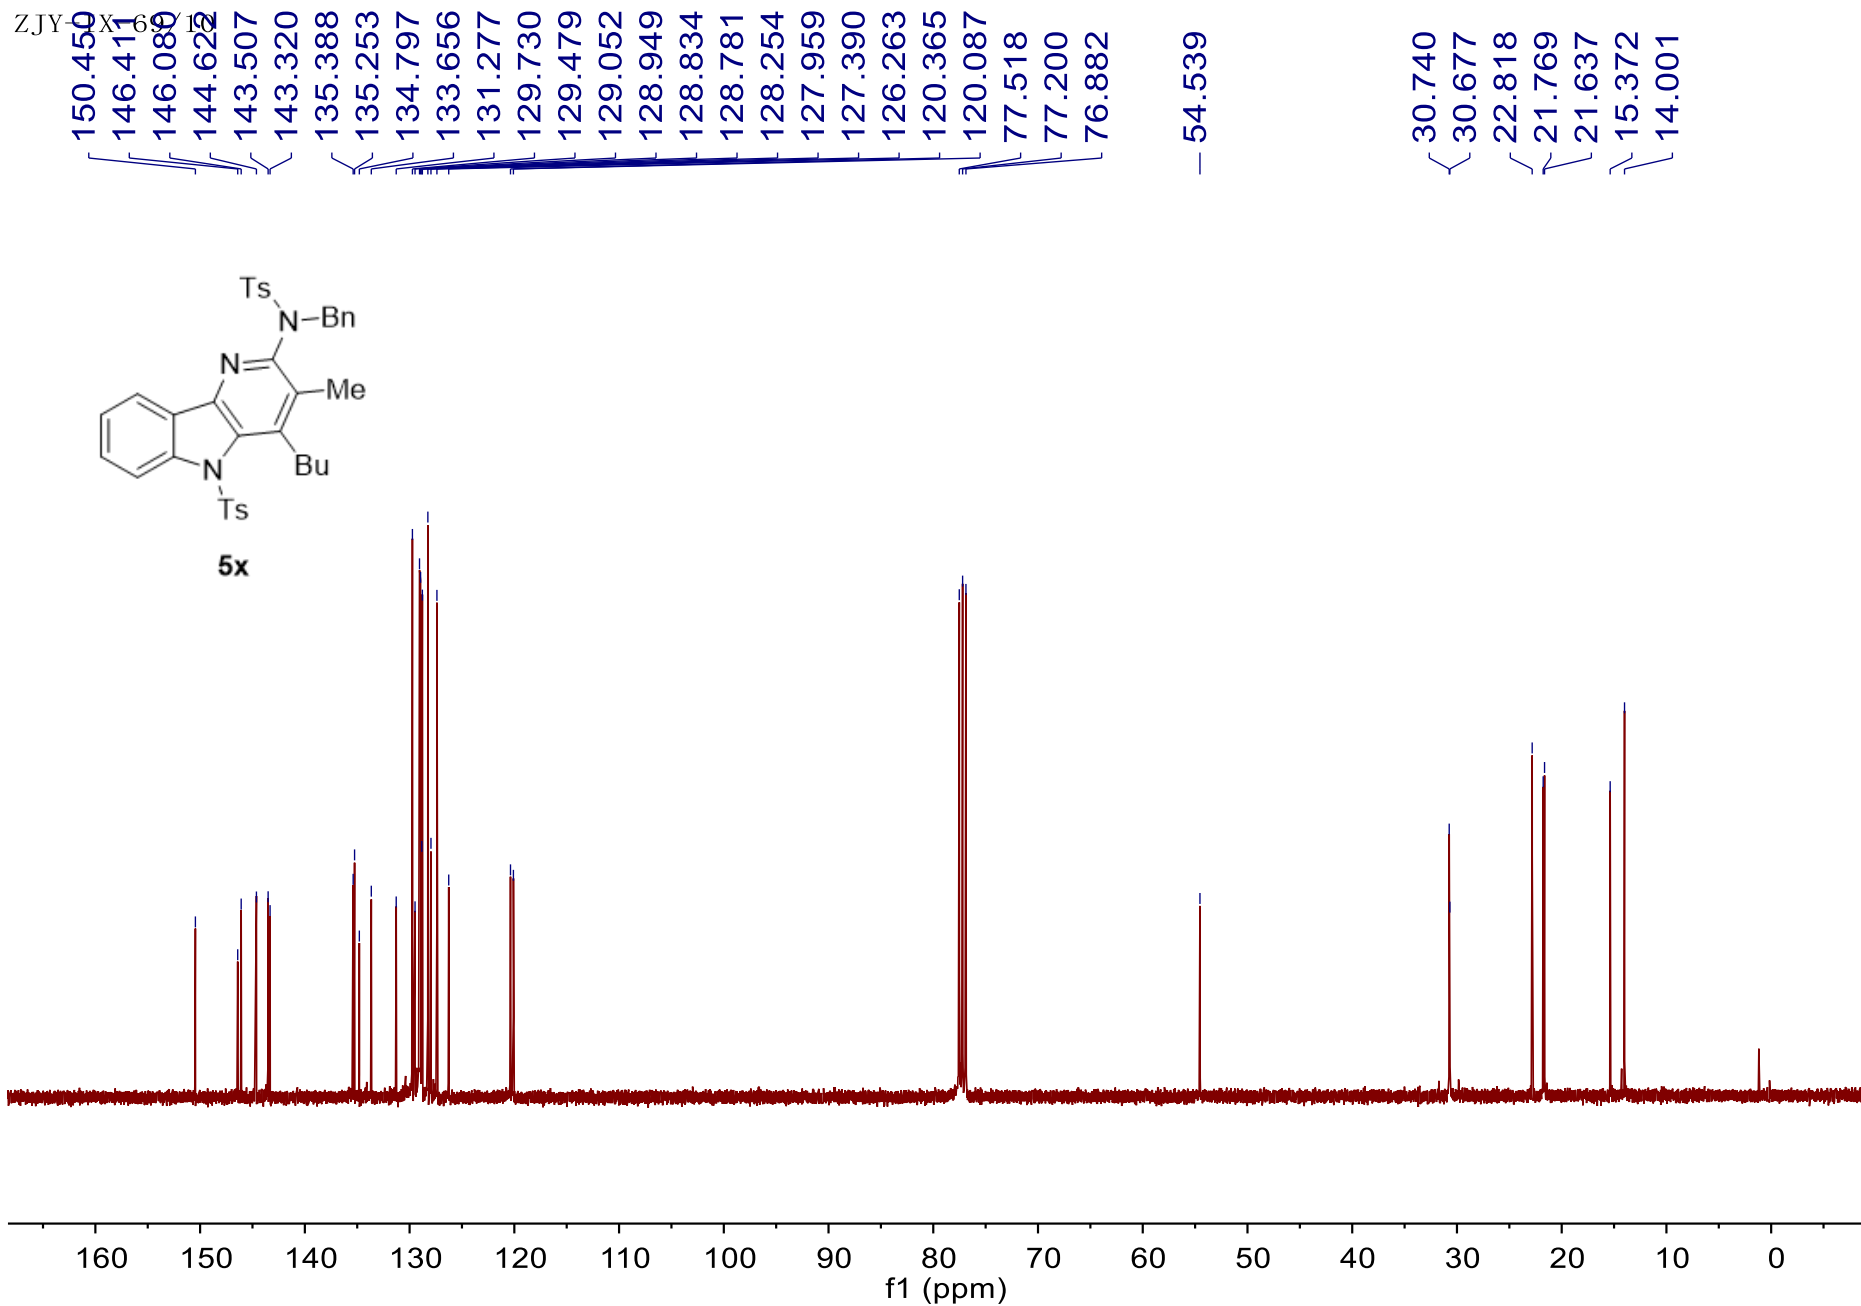

ZJY-IX-4 10.fid

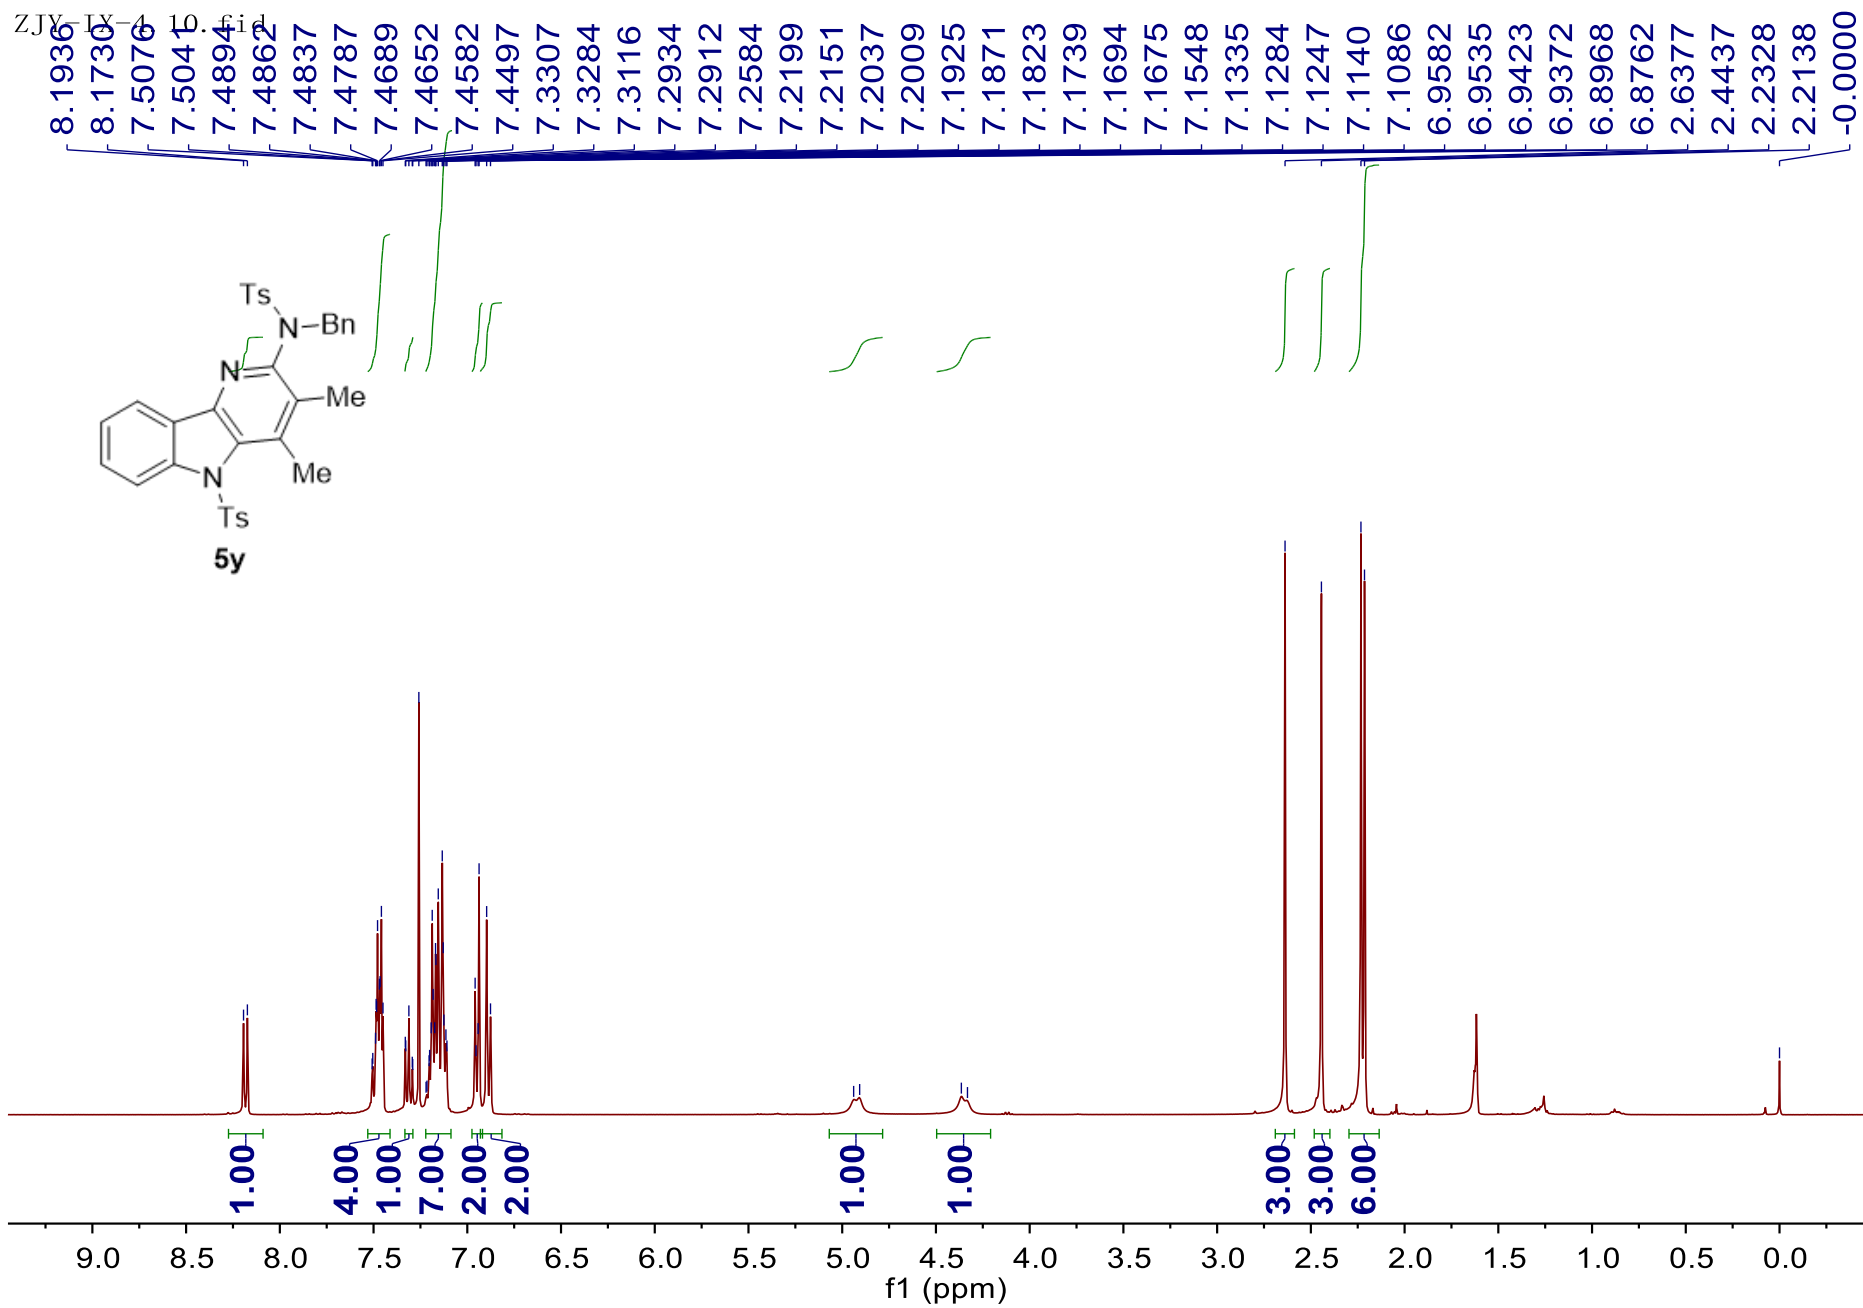

ZJY-EX411.f1d

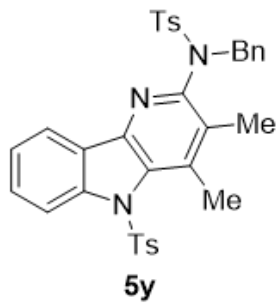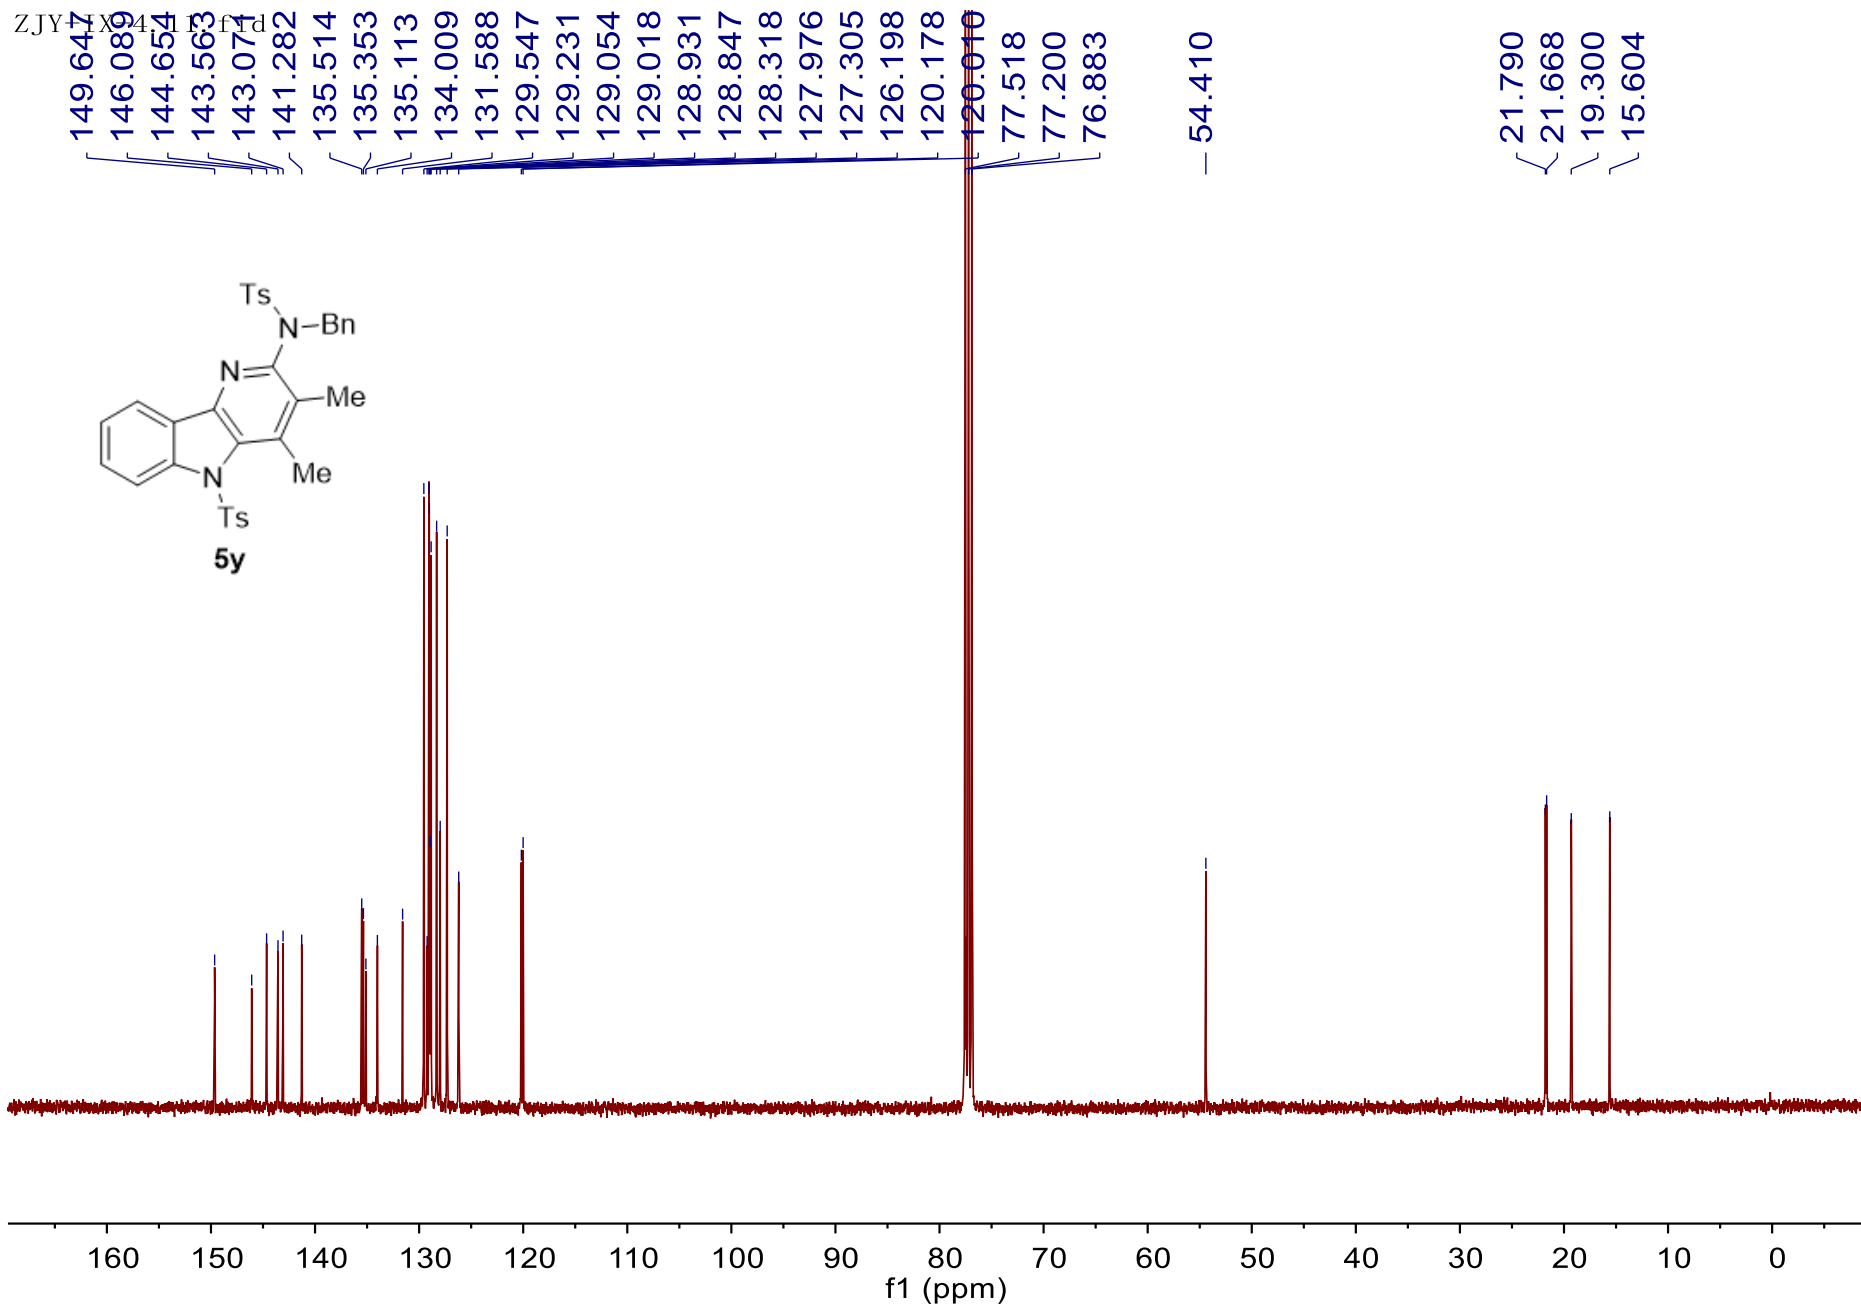

S170

ZJY-IX-5.10.fid

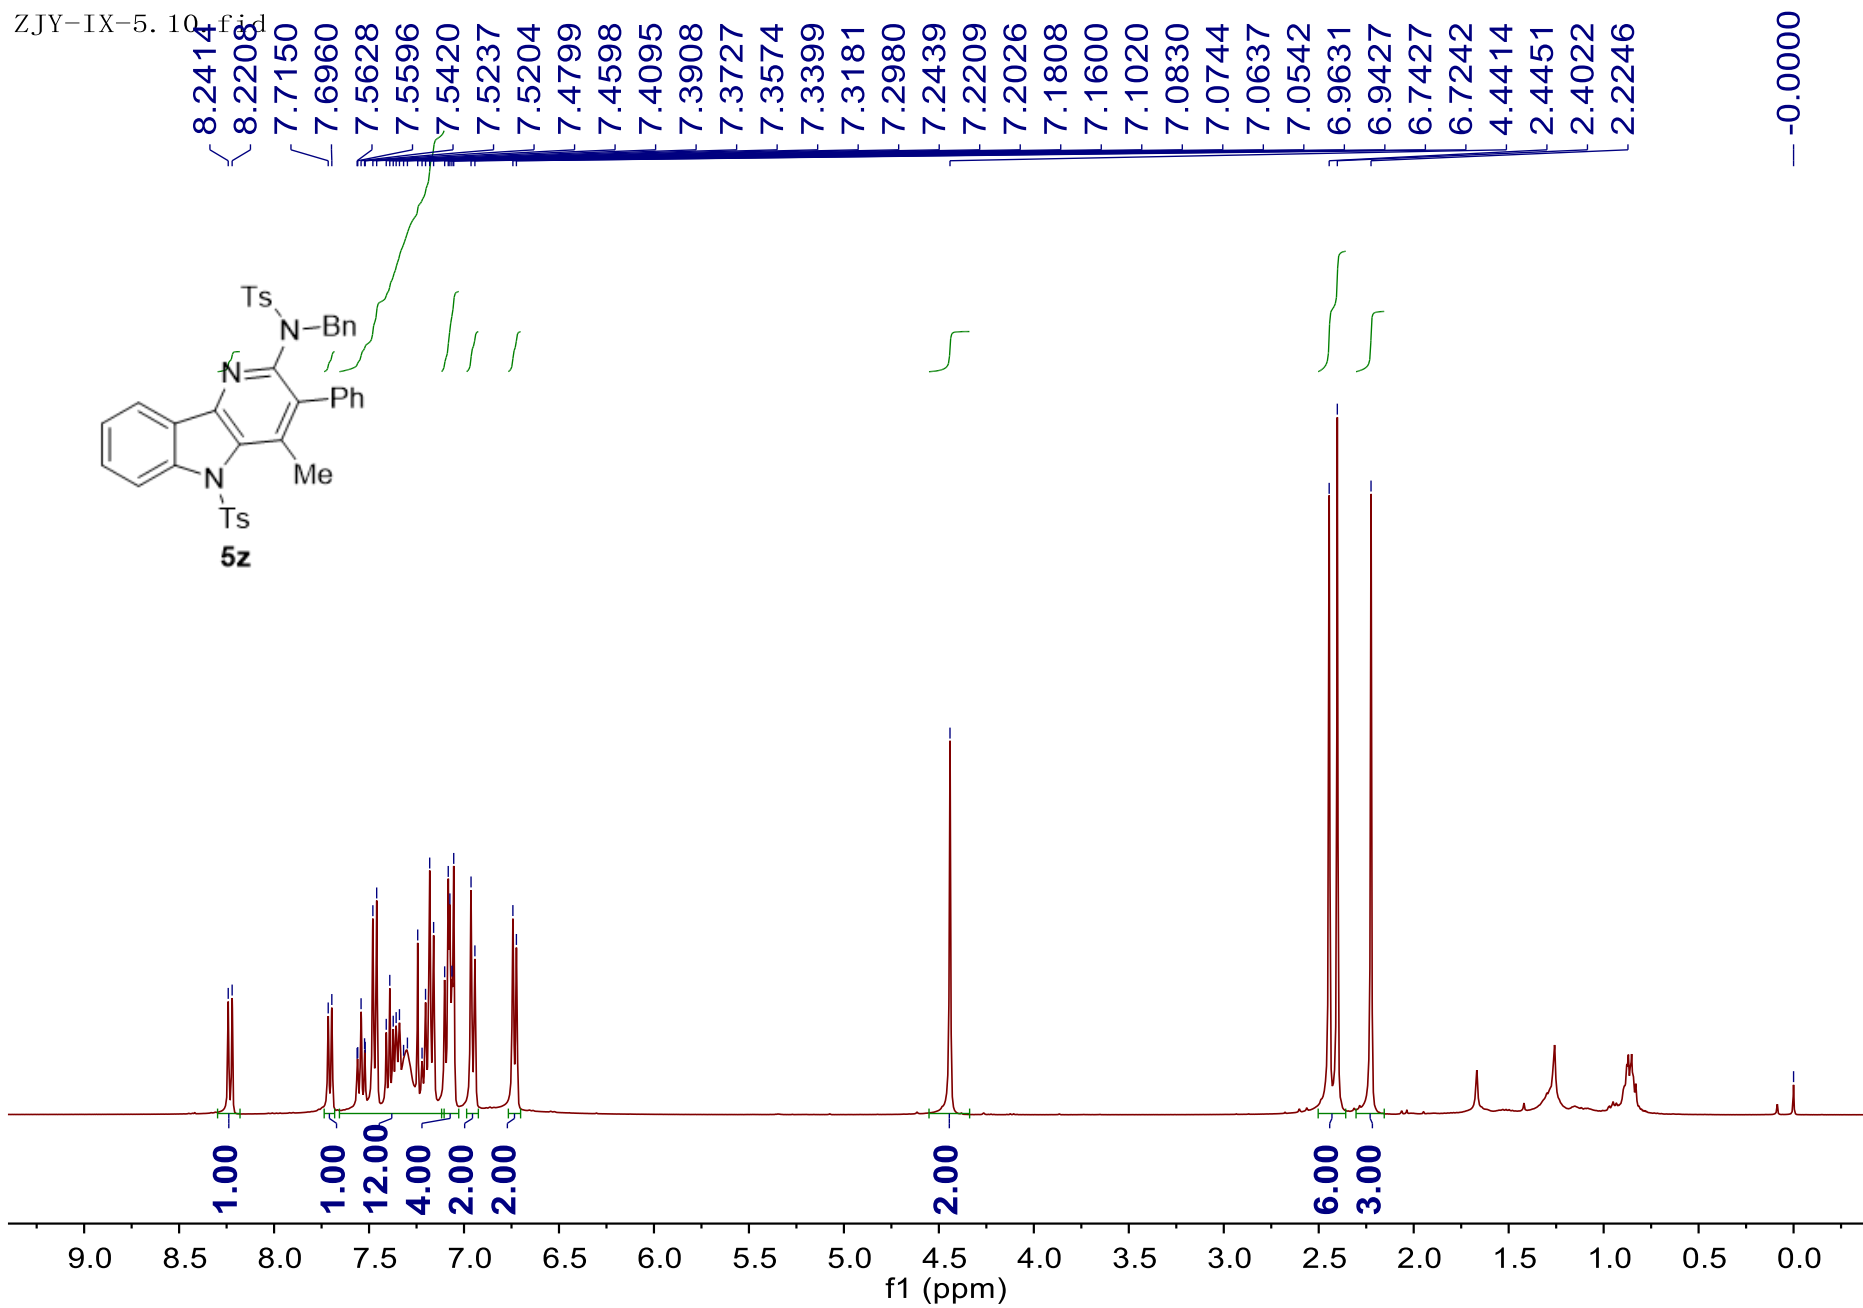



ZJY-19

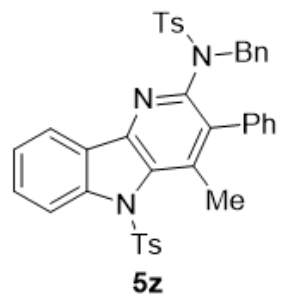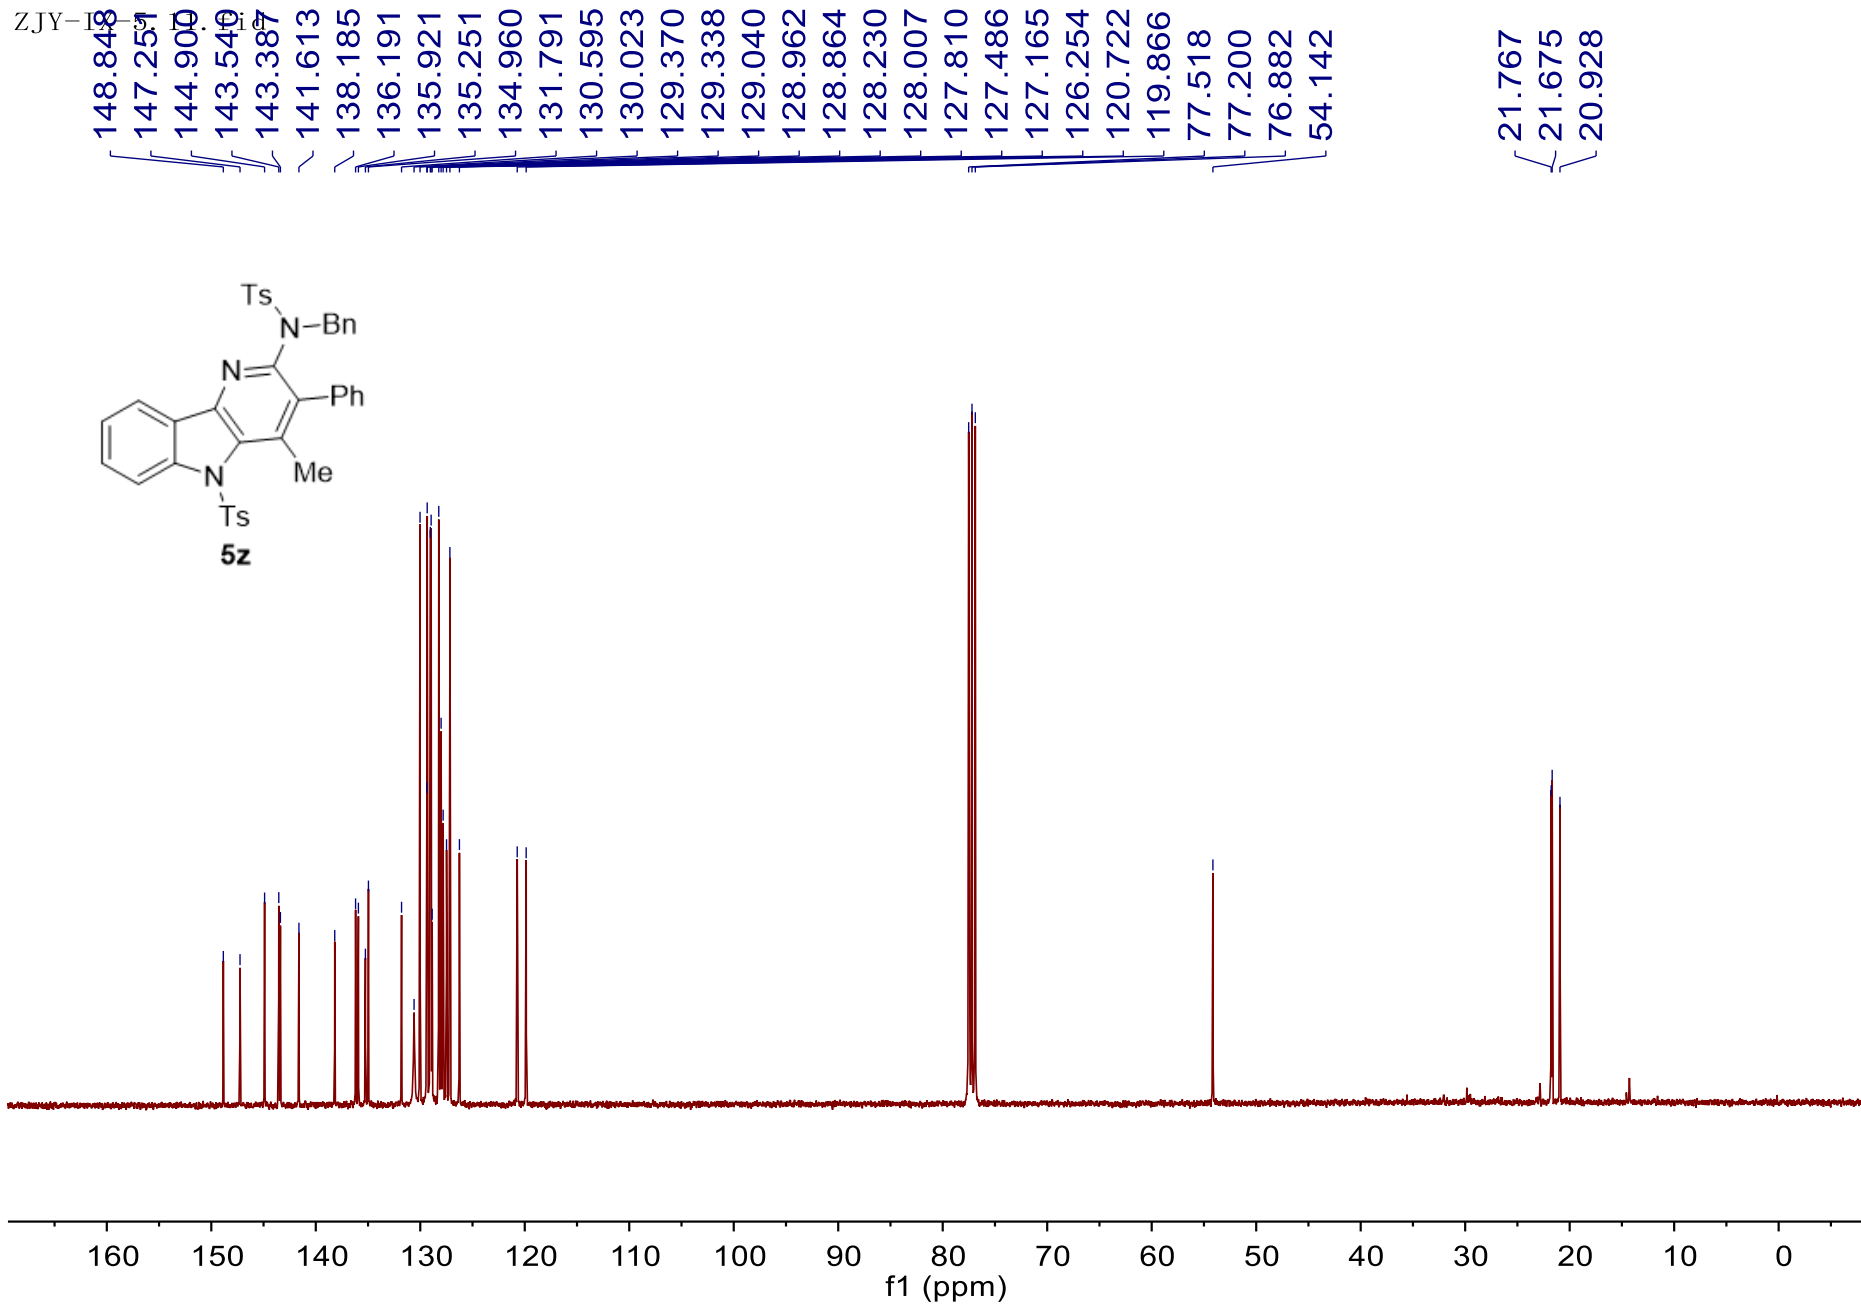

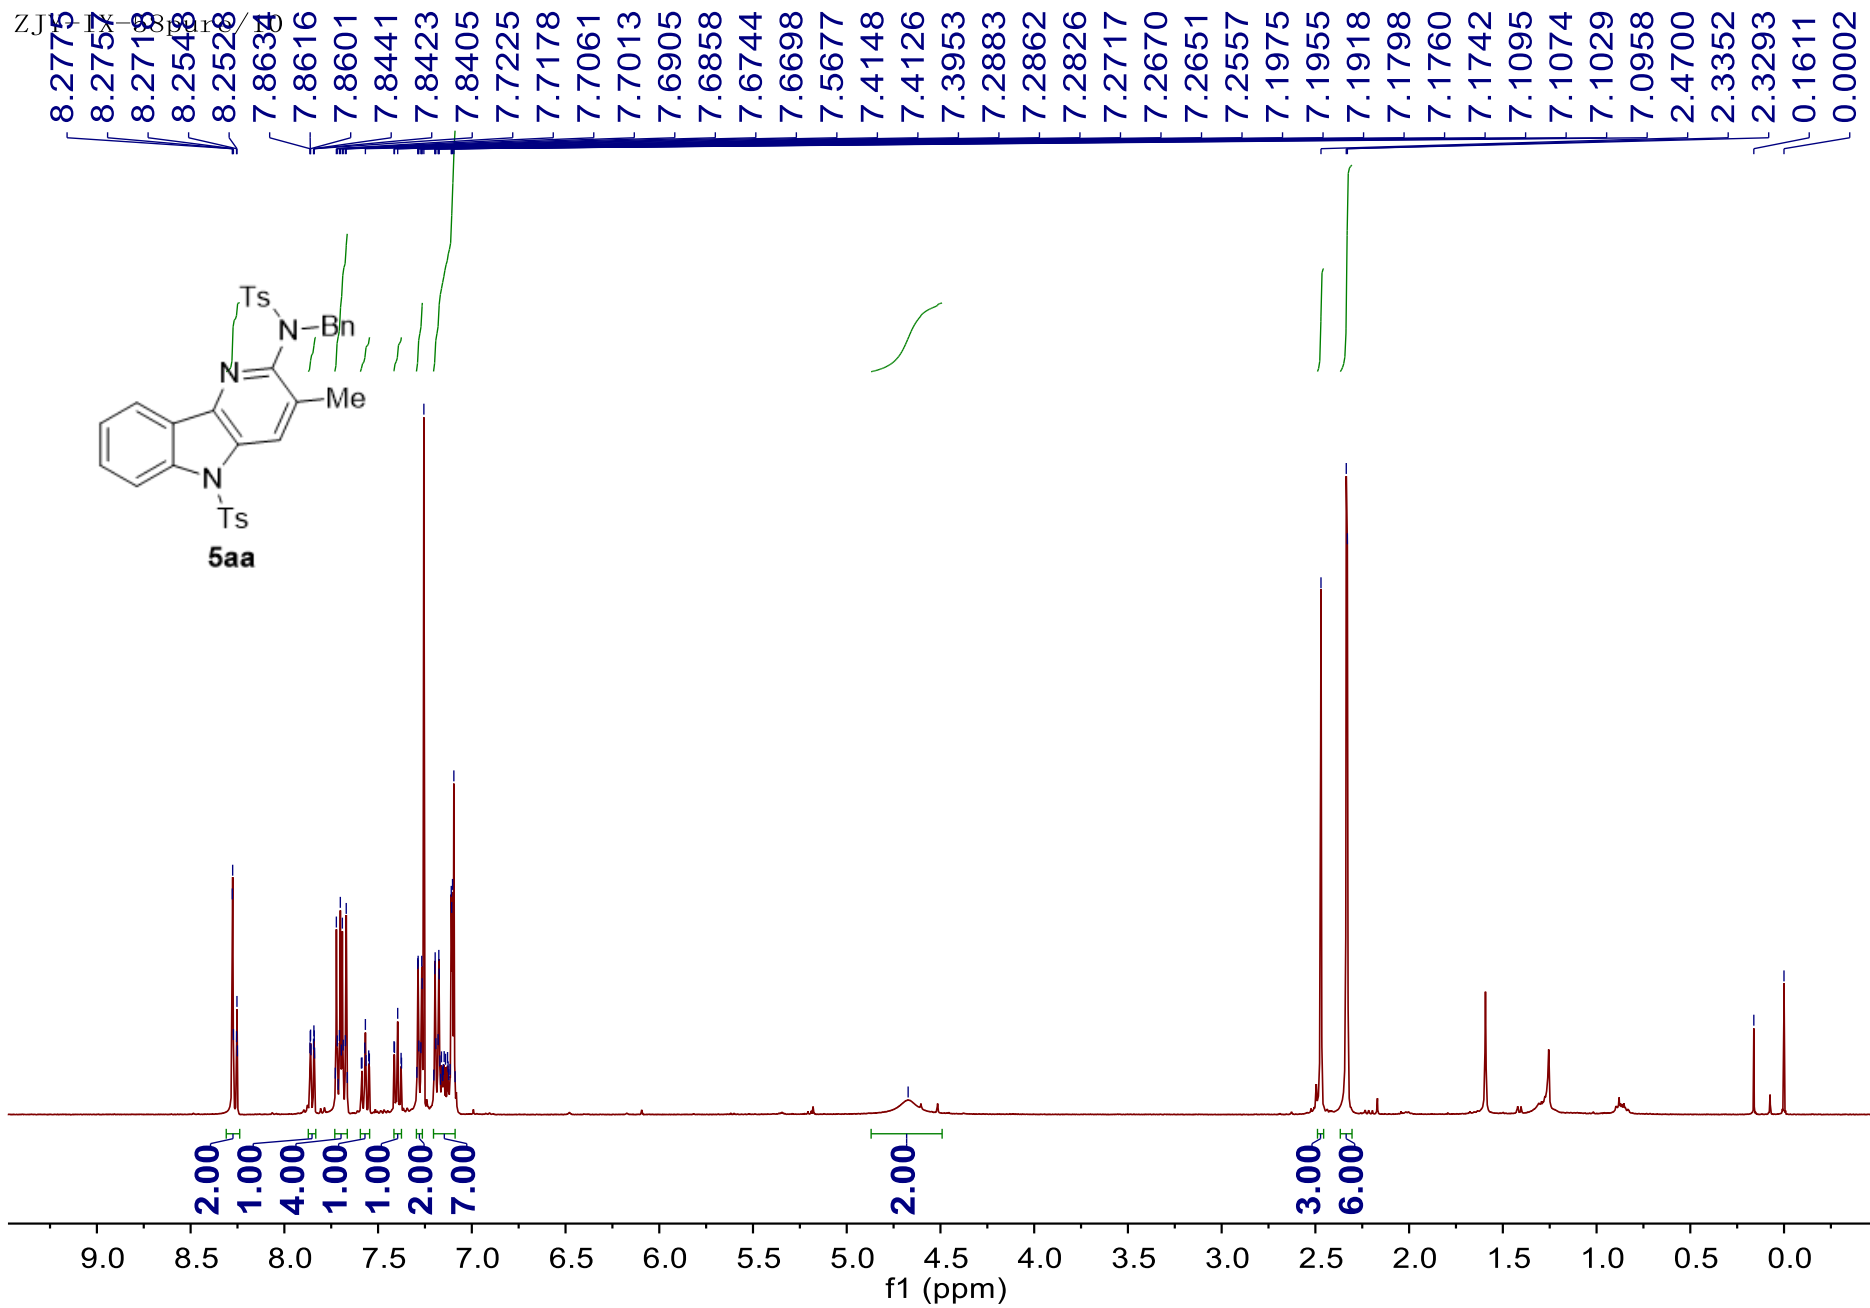

ZJY-X-58-1-14d

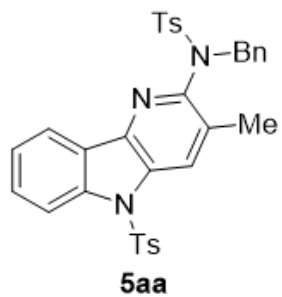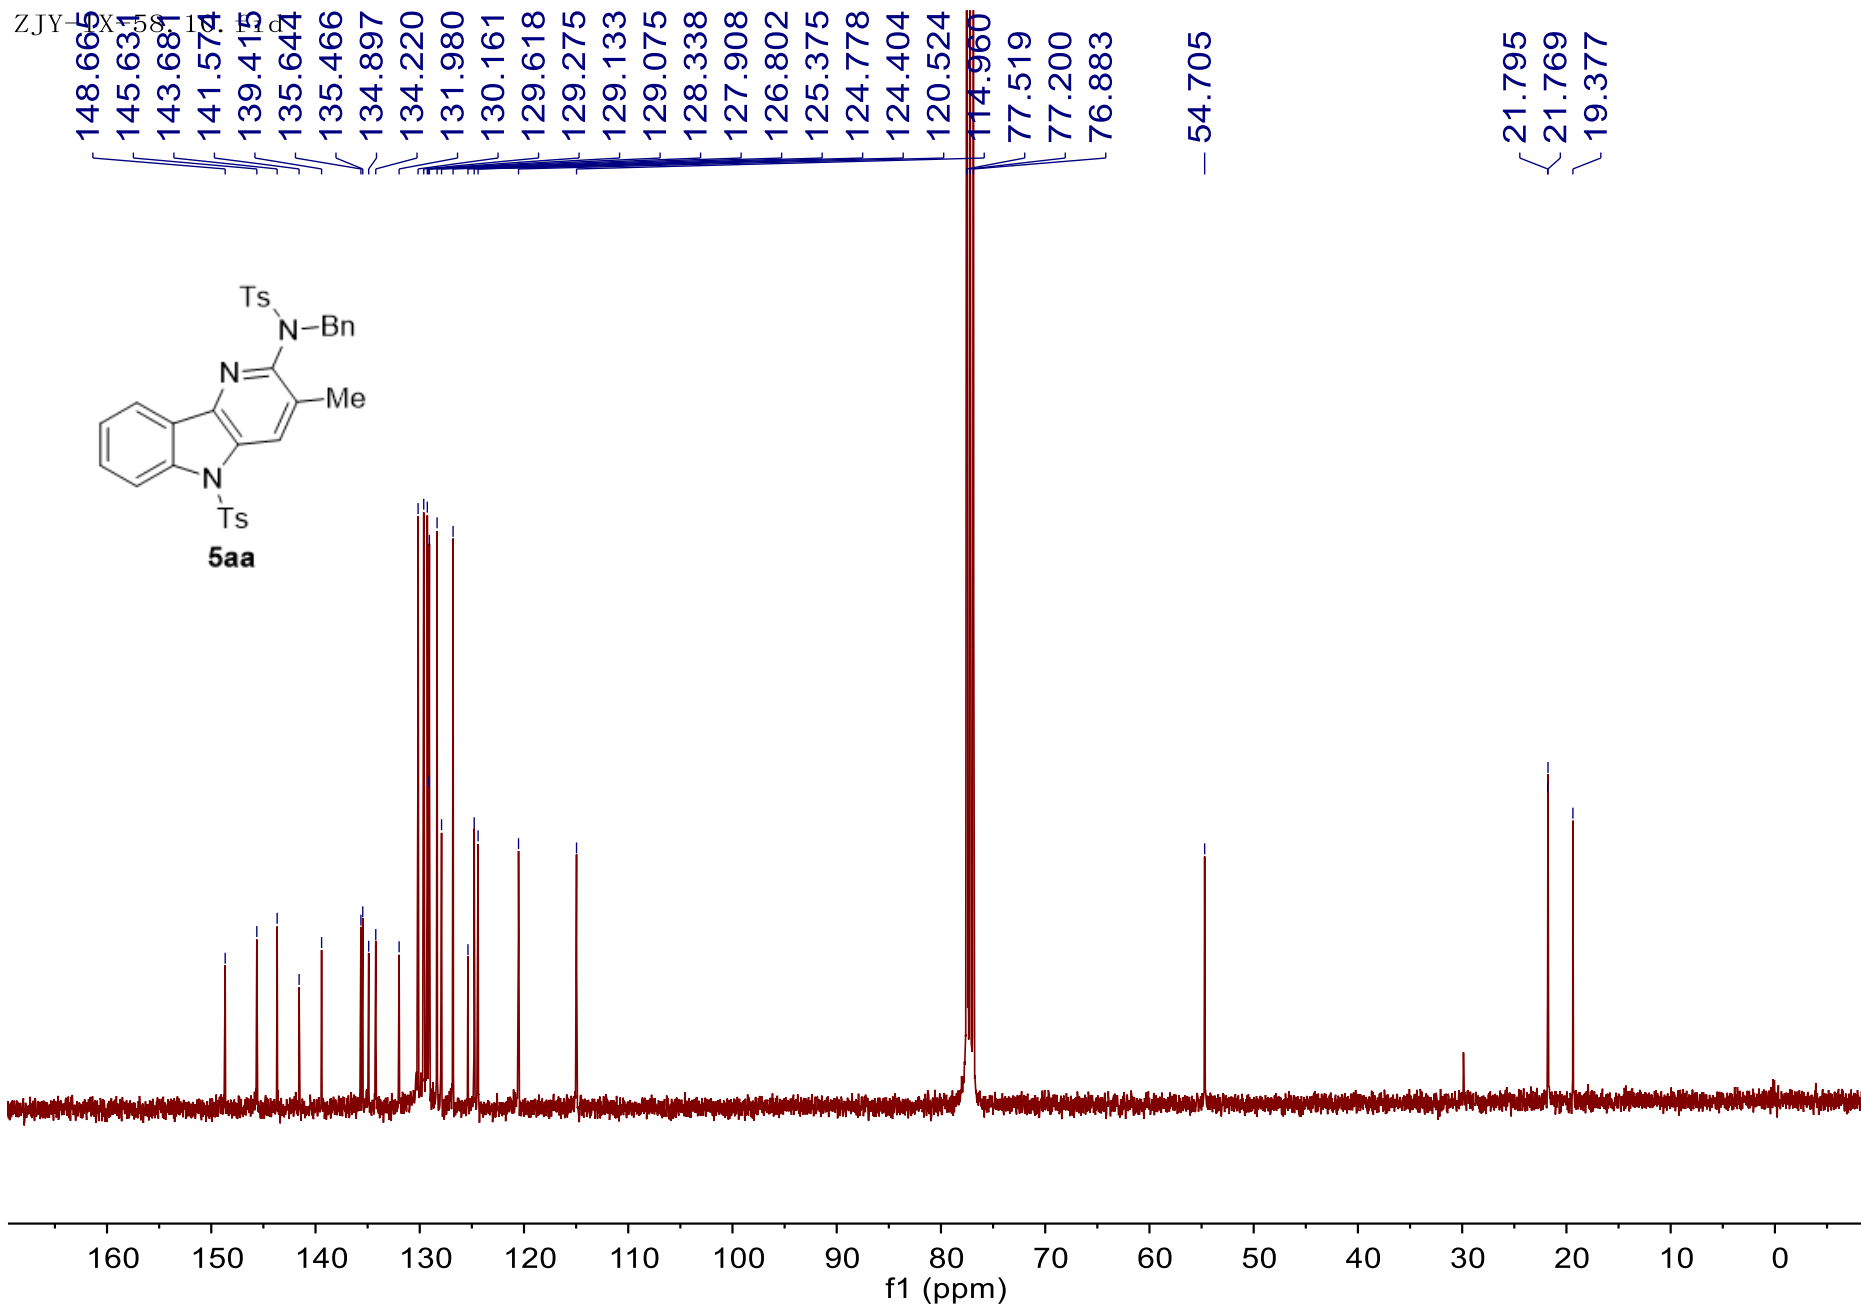

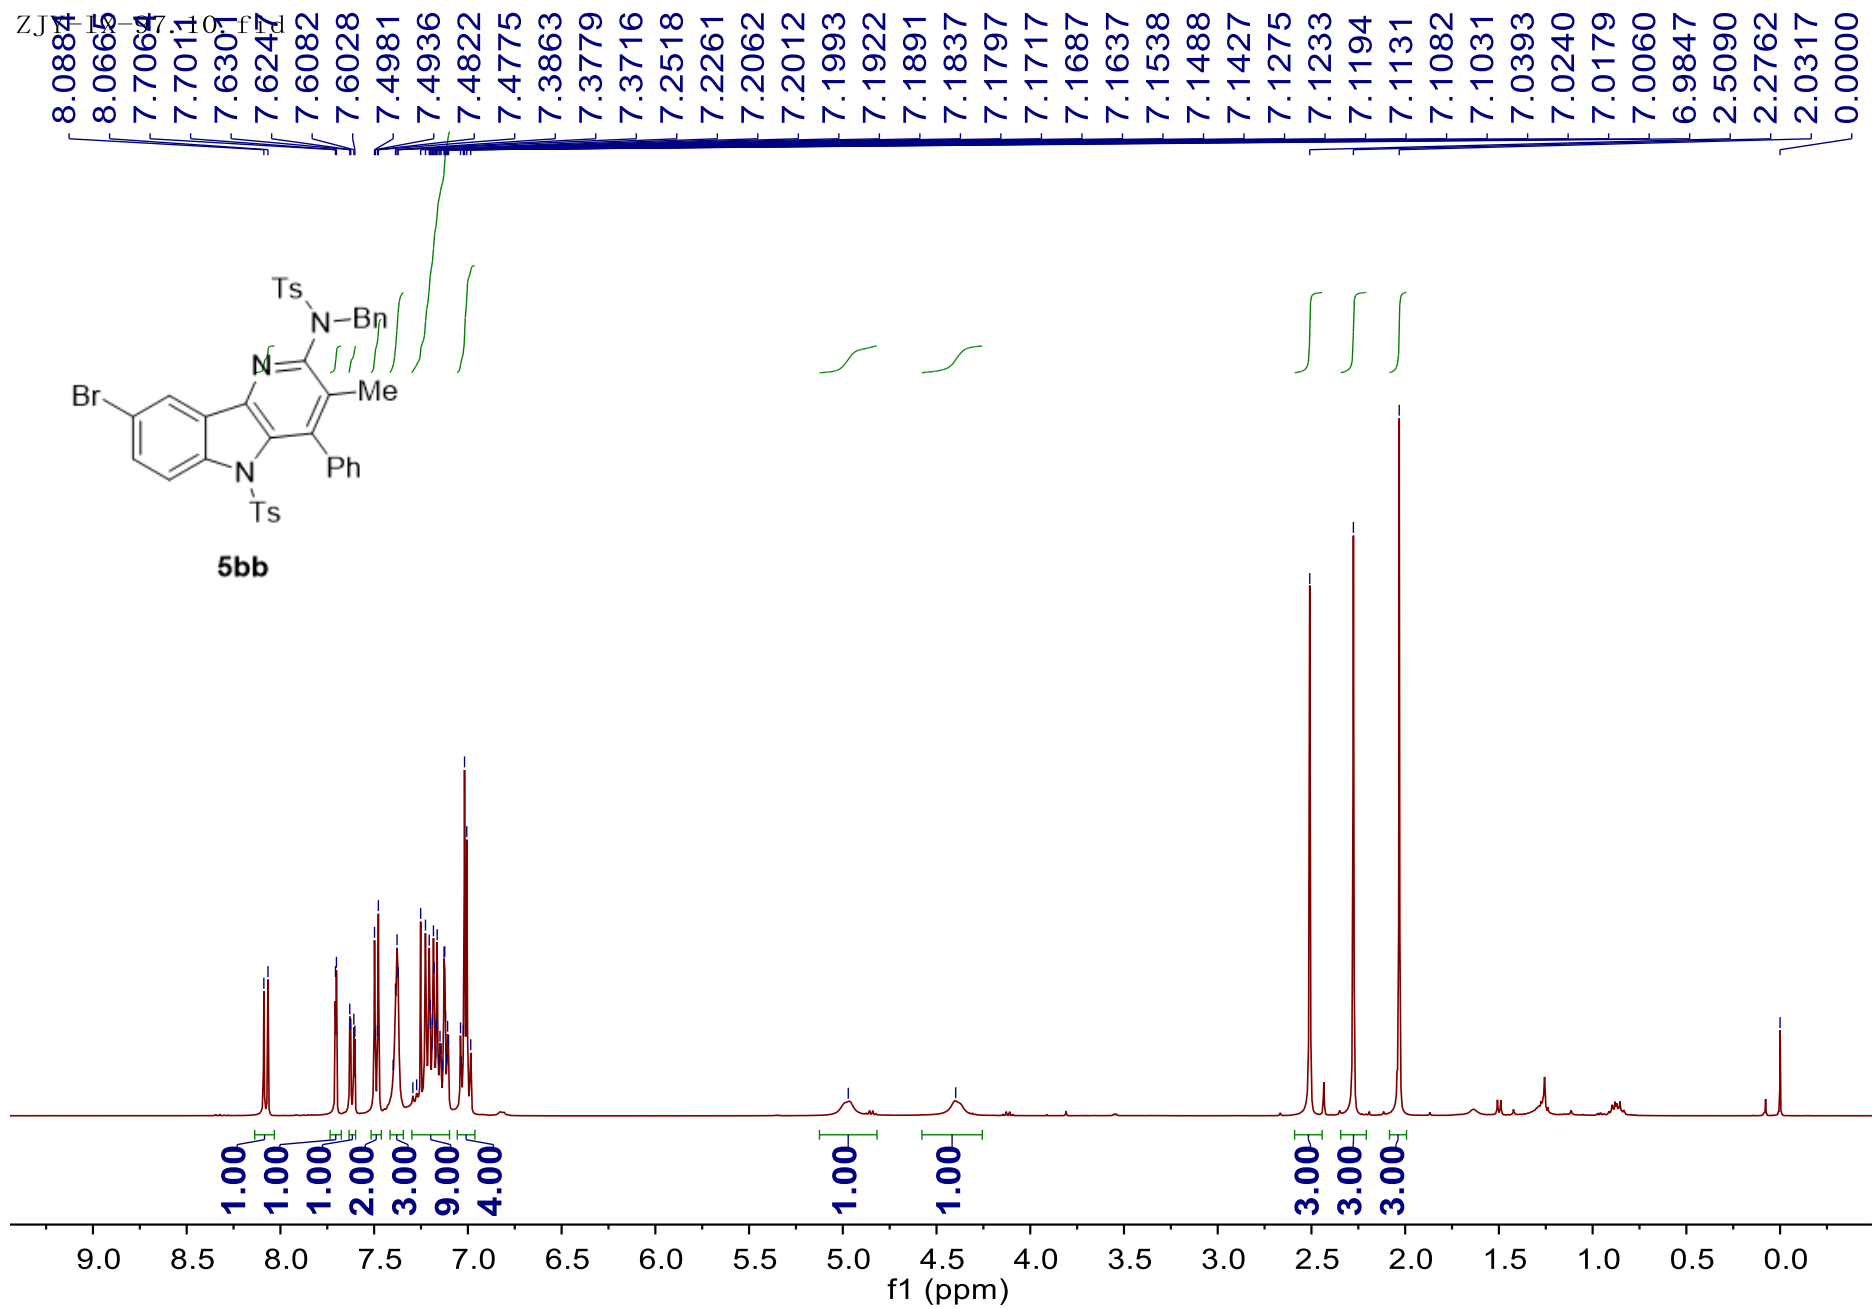

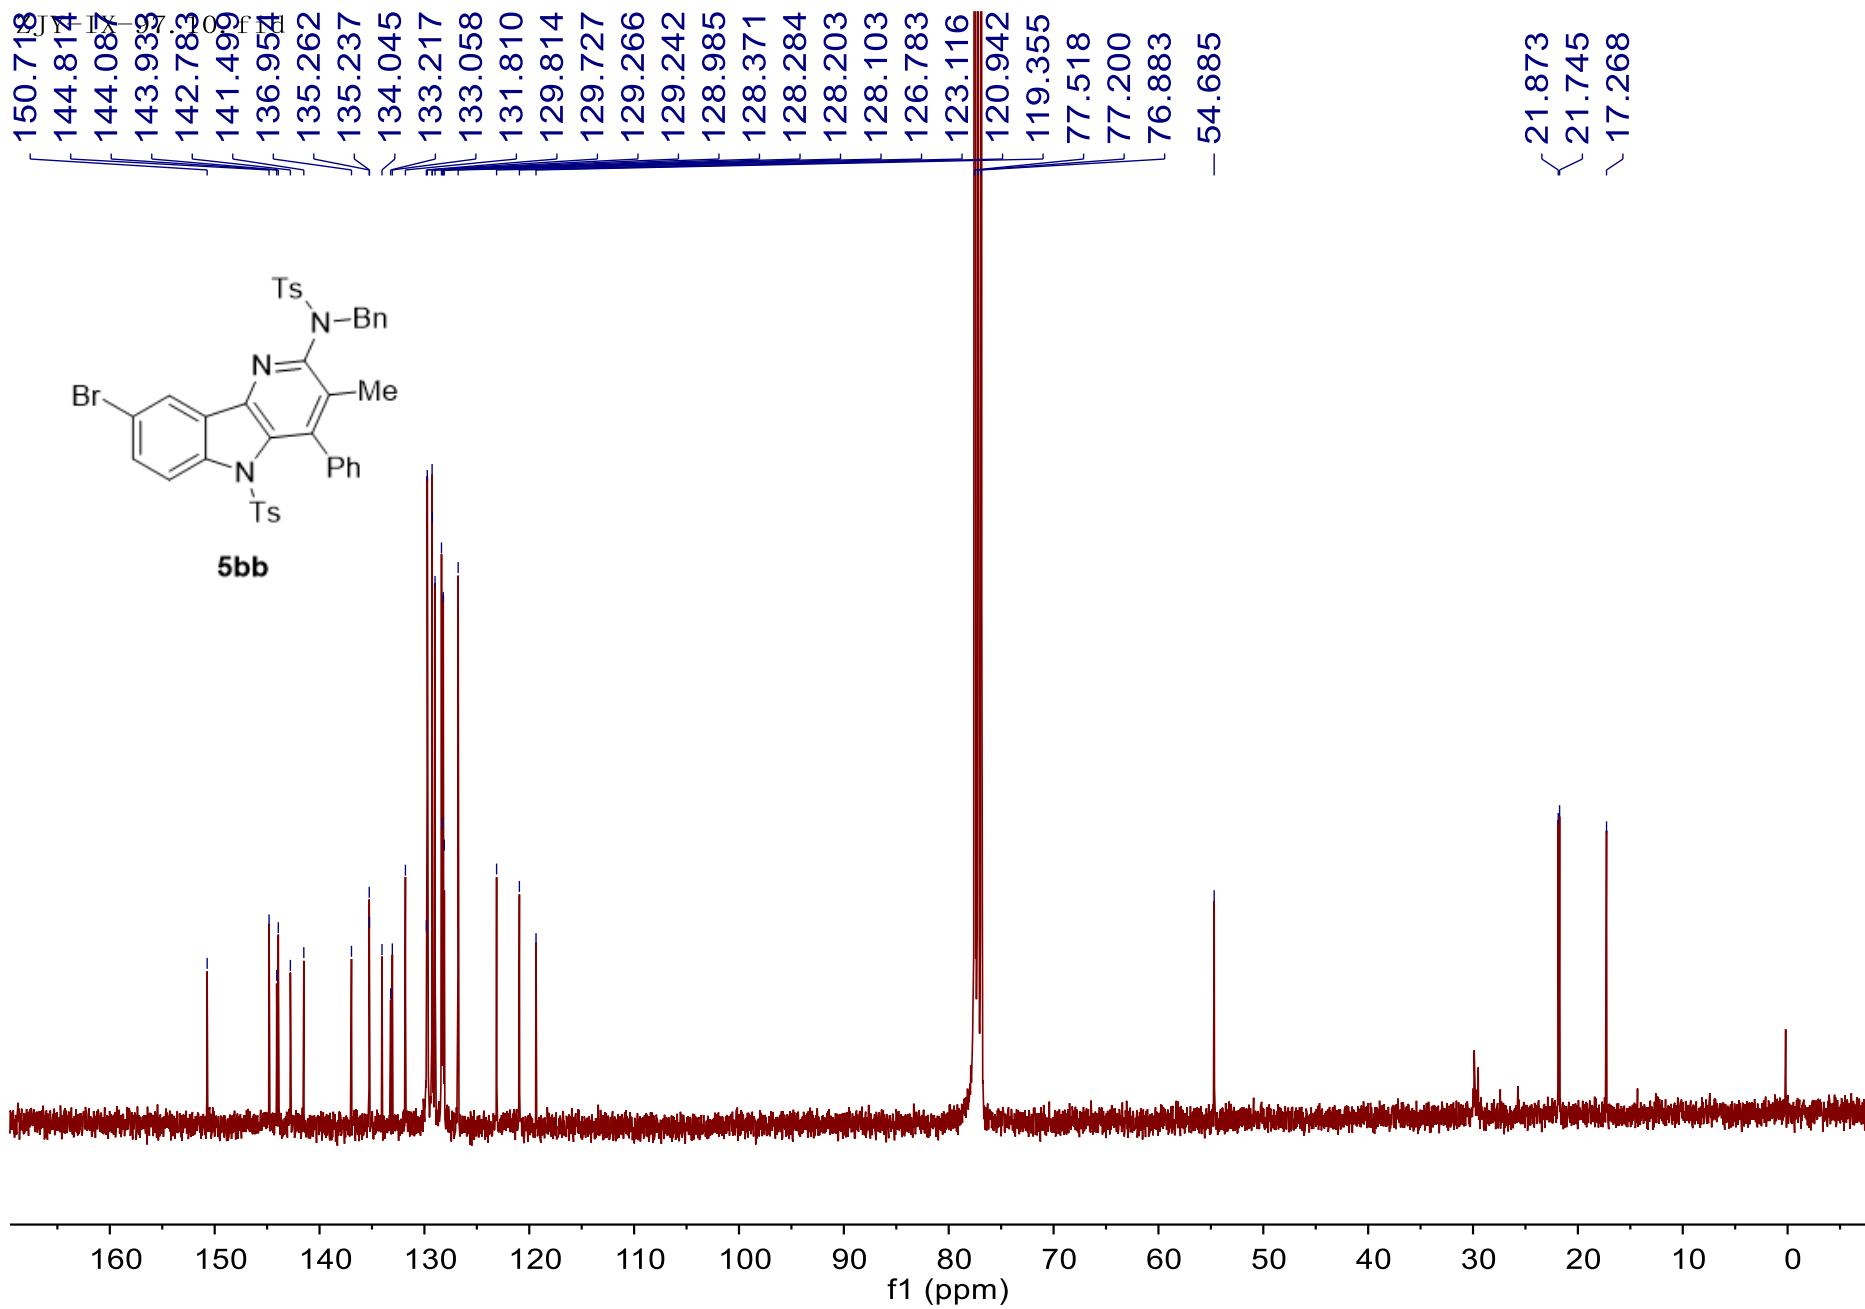

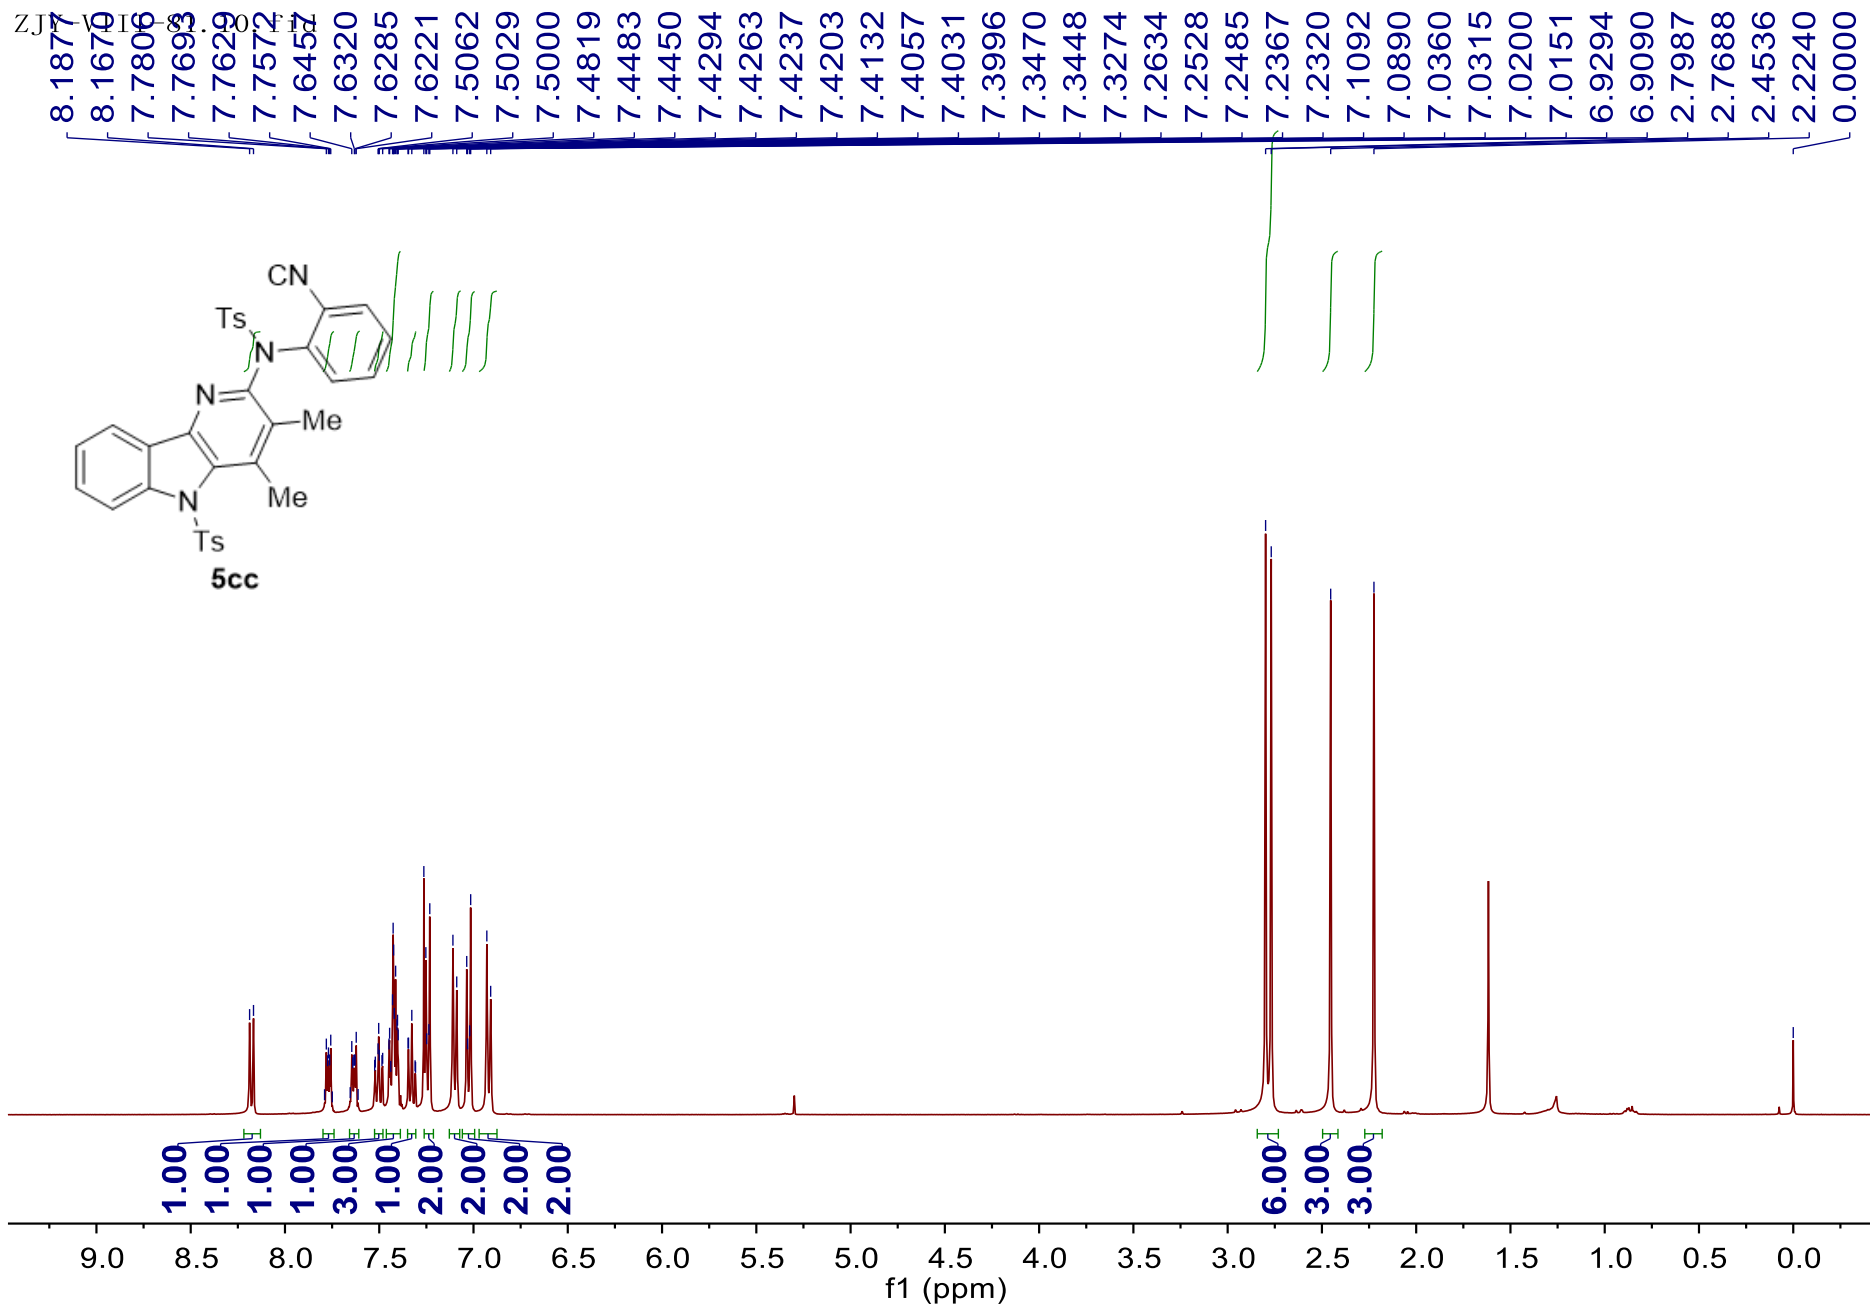

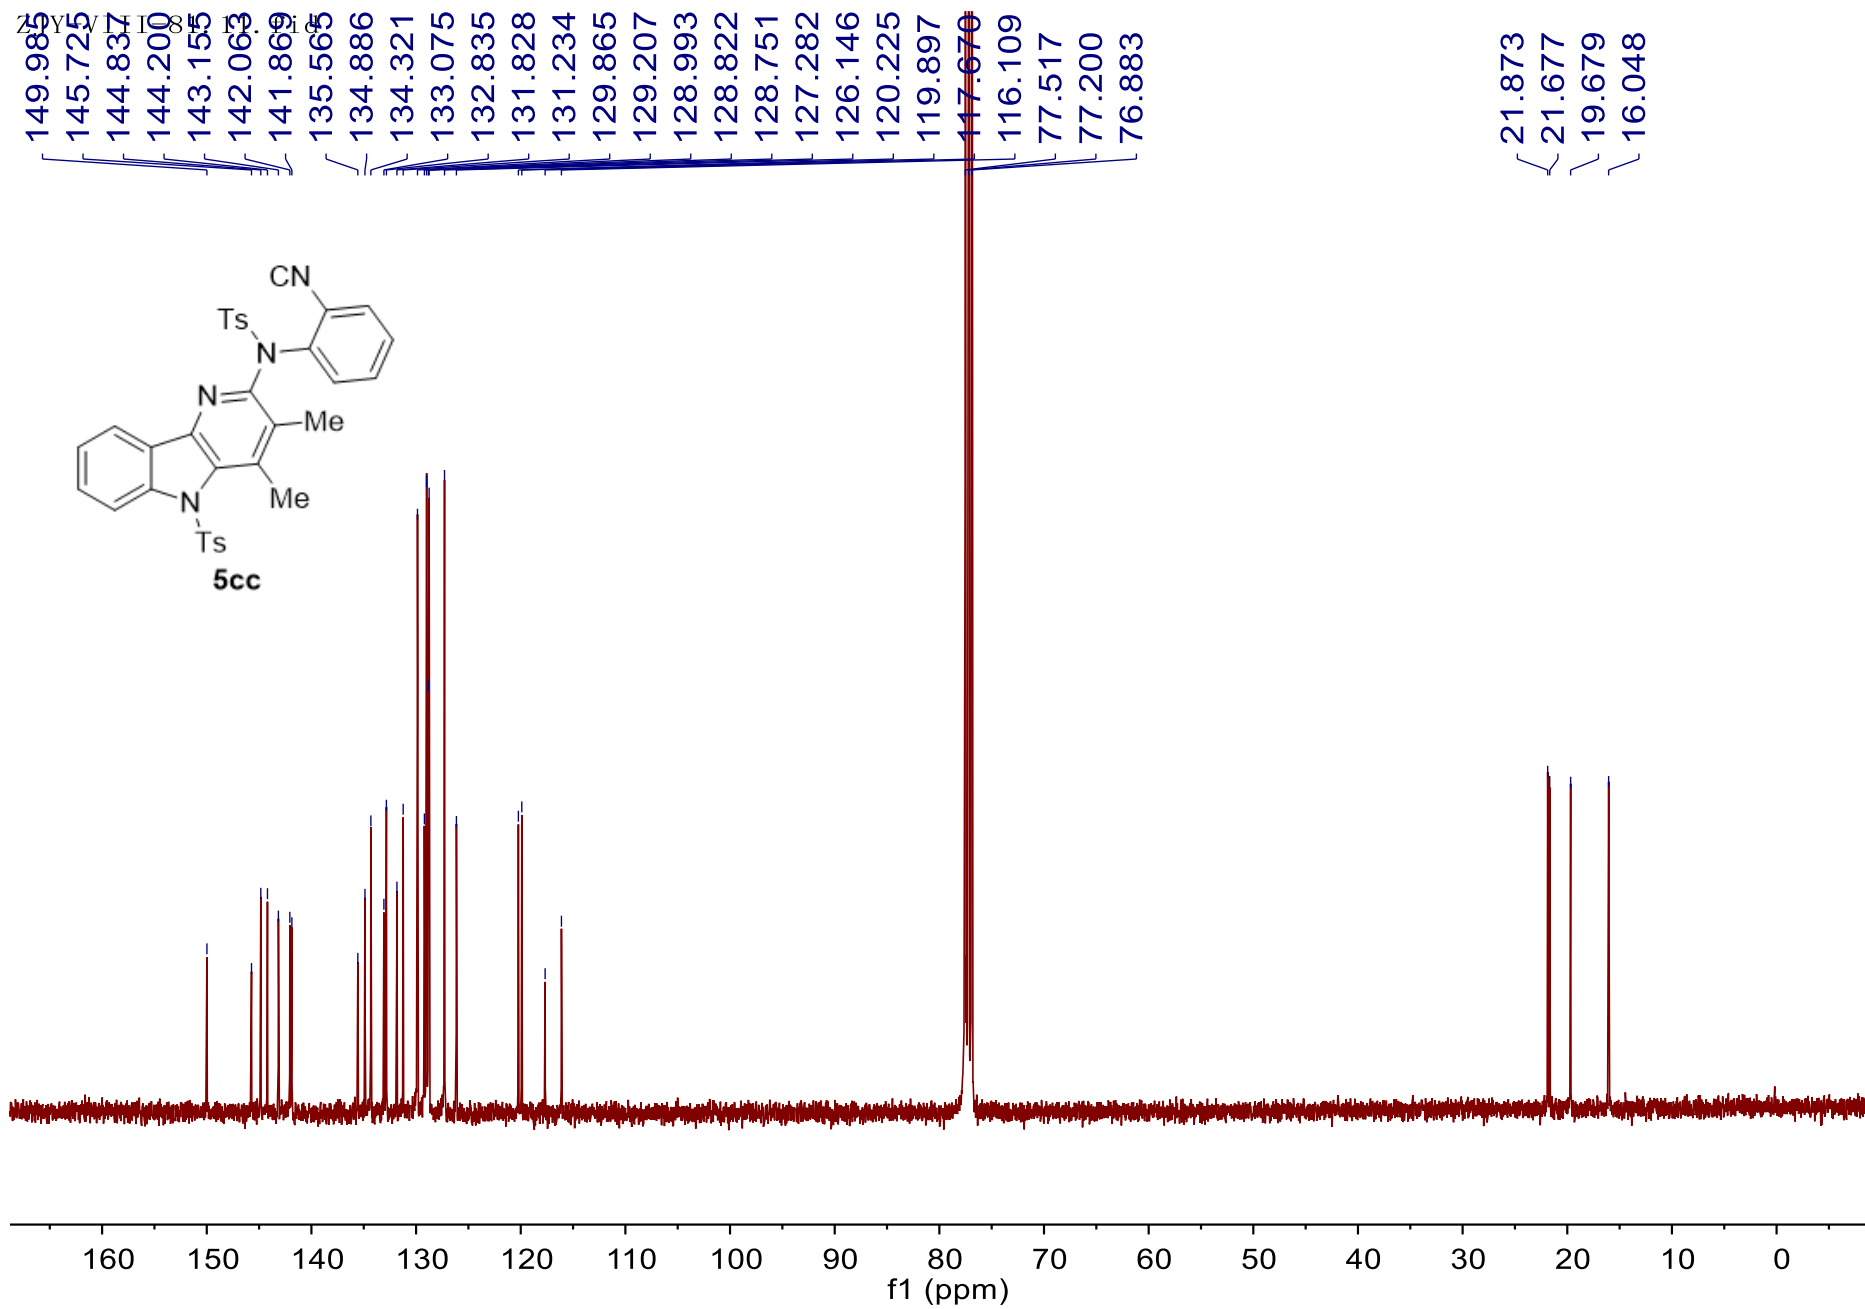

ZJY-IX-82-10.fid

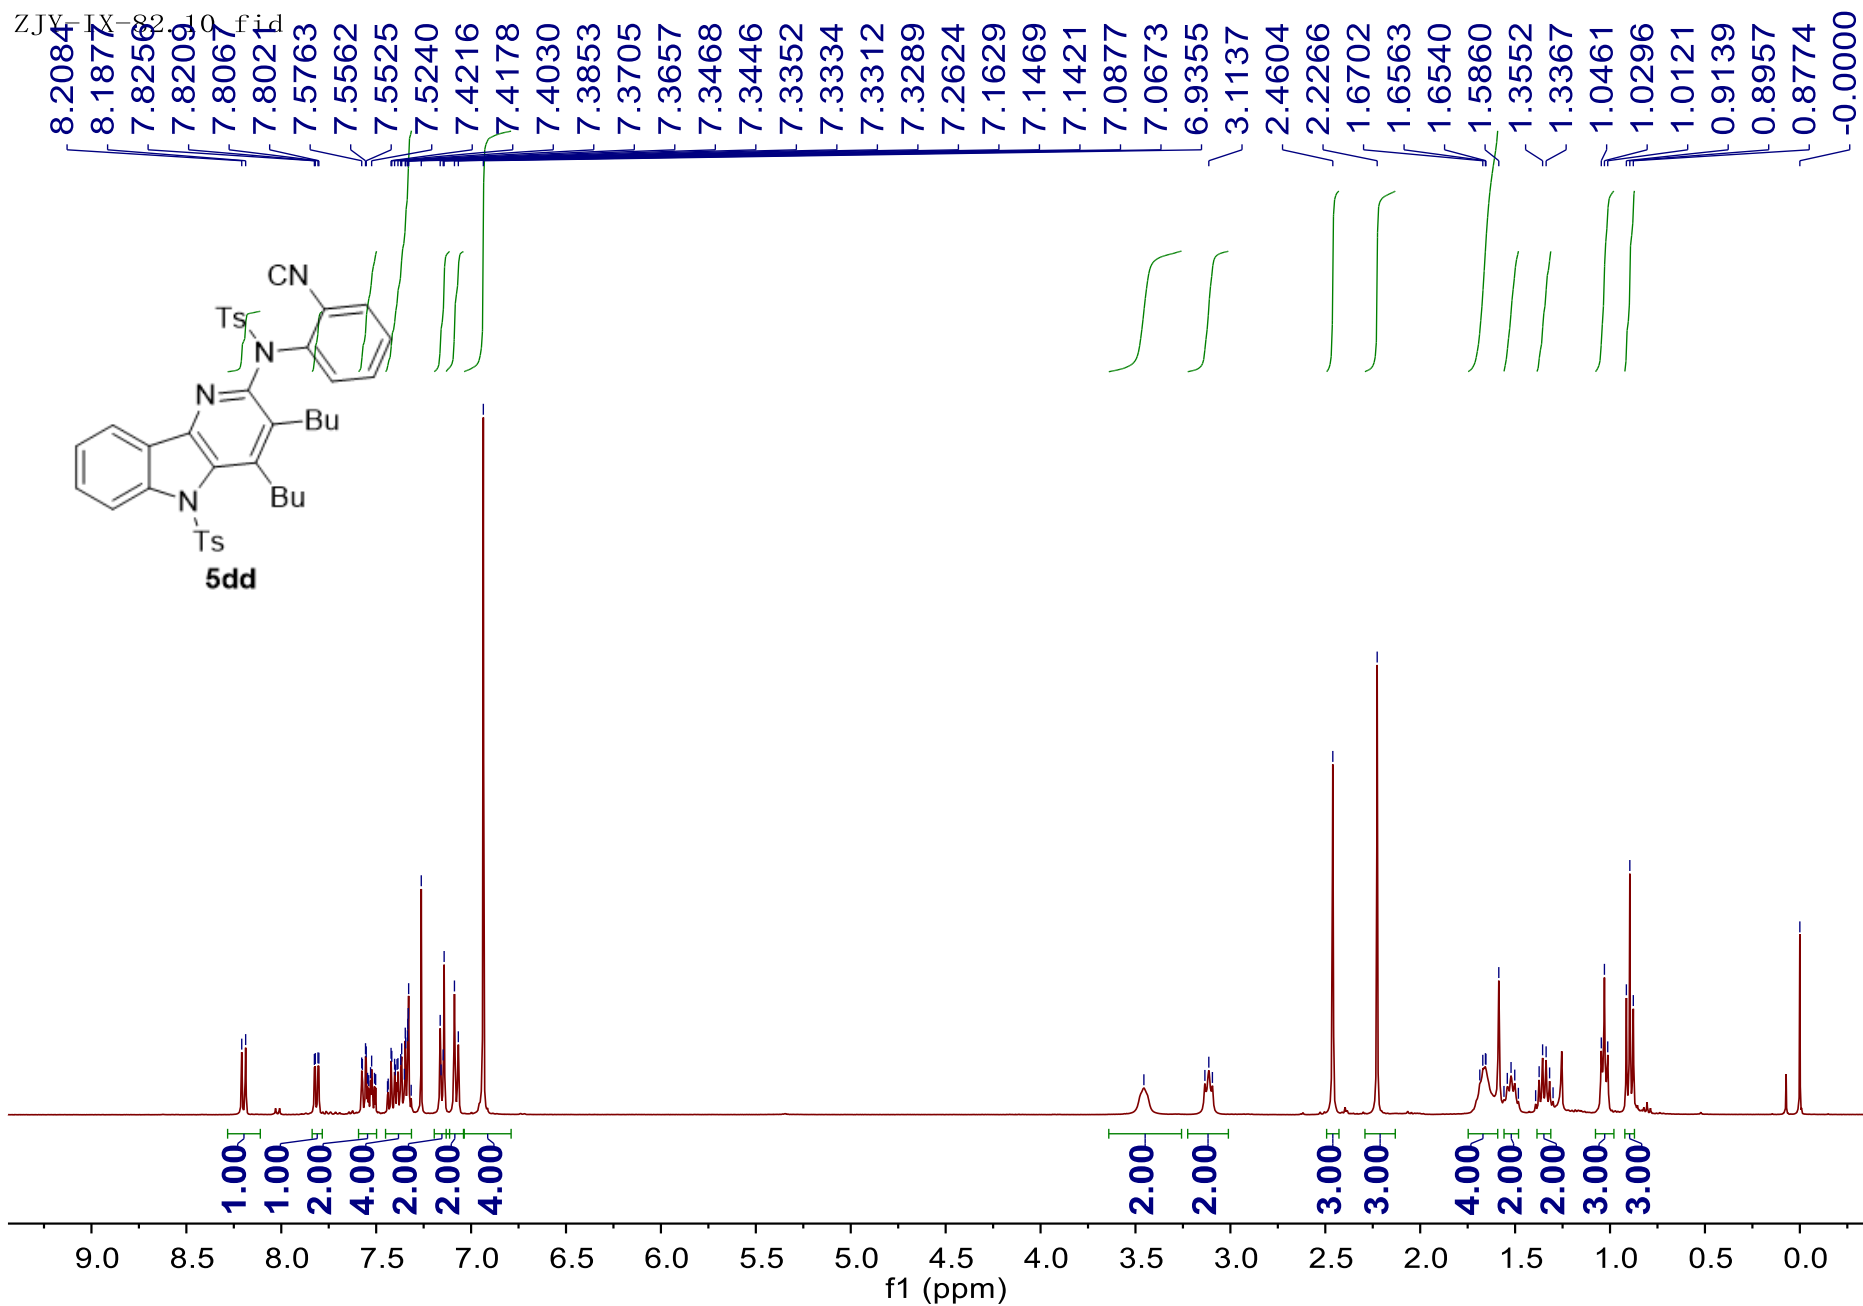



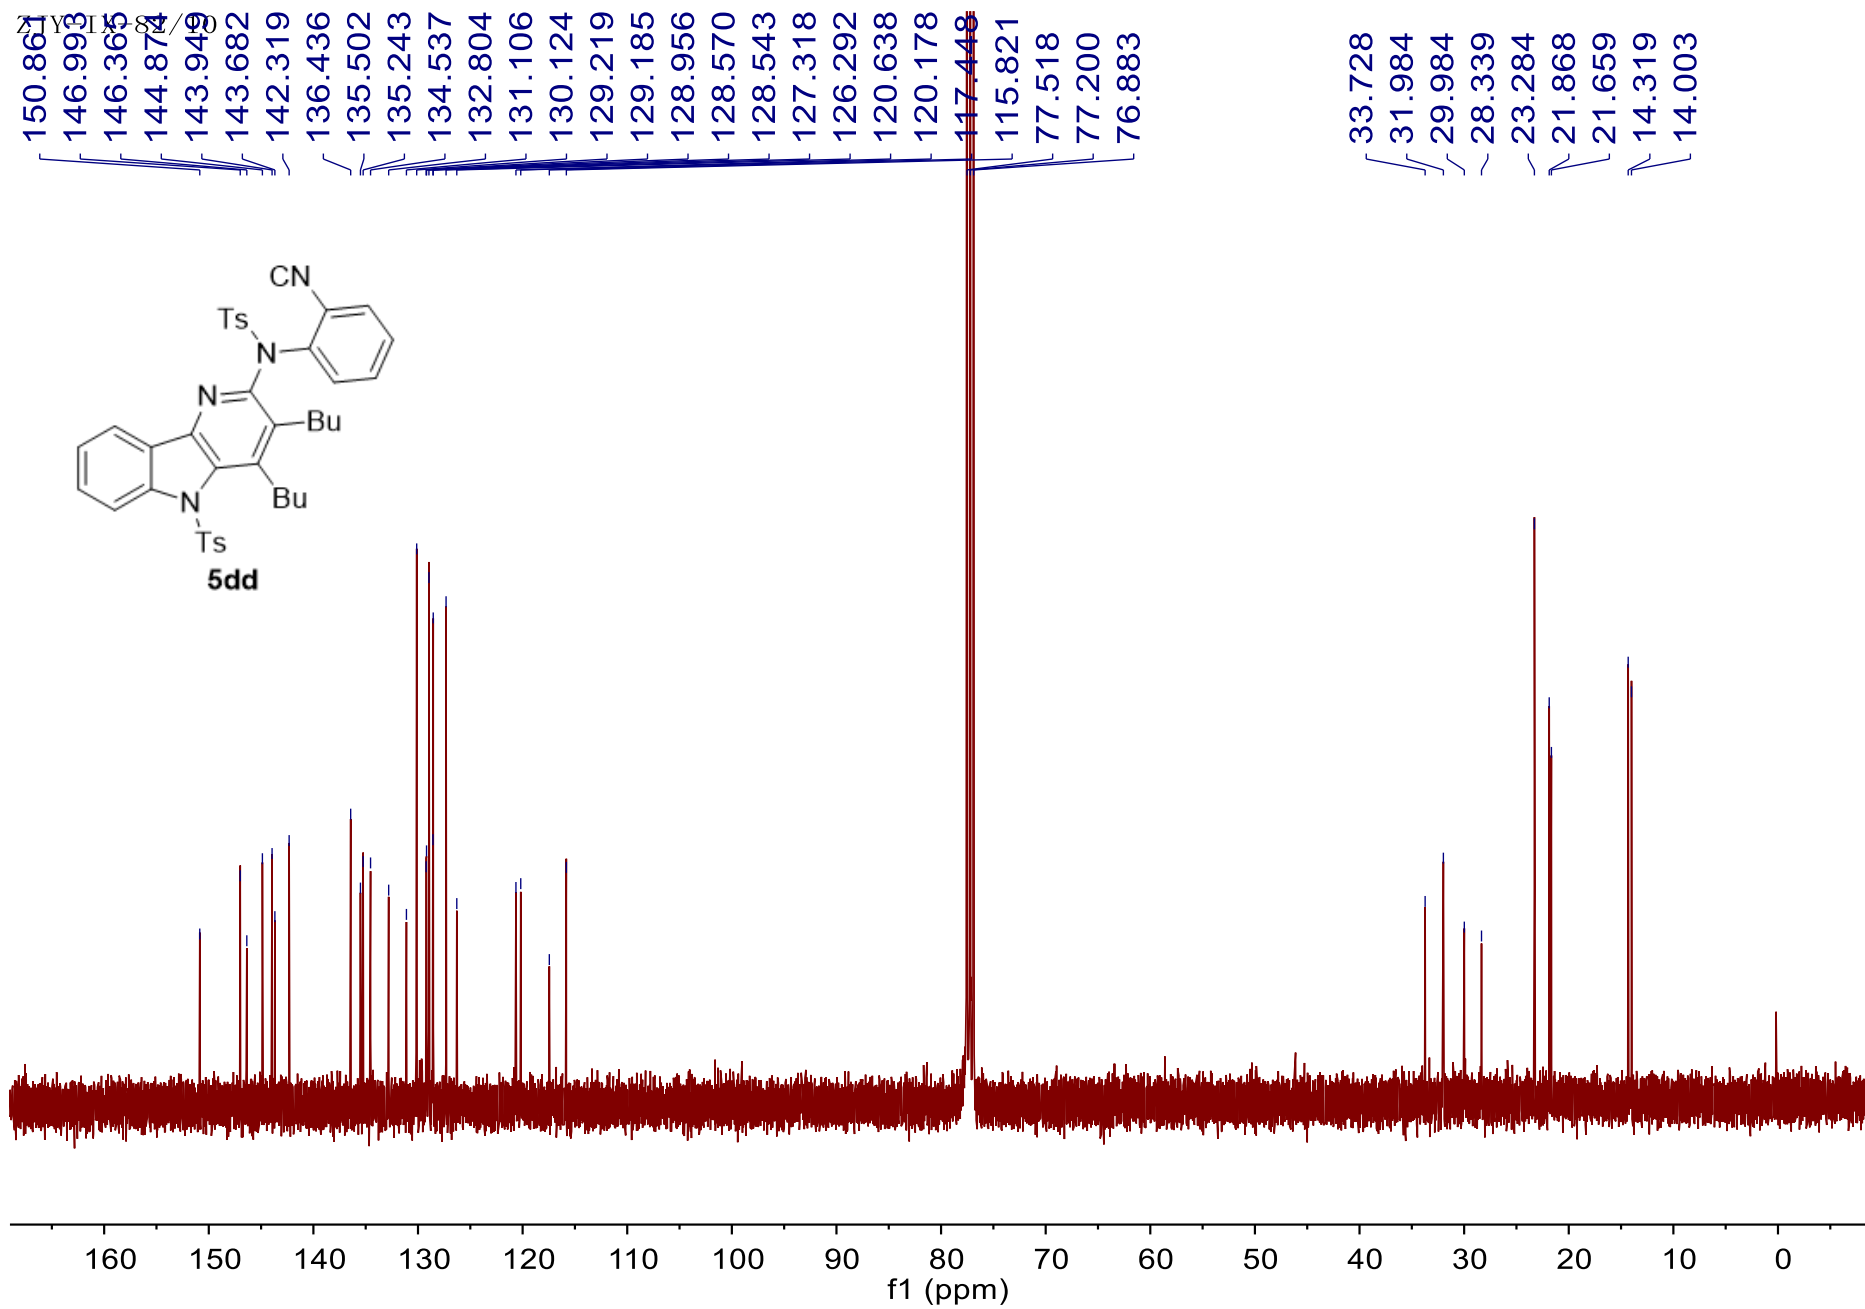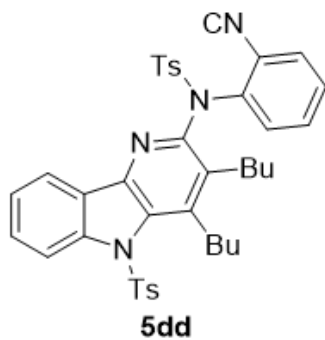

S180



150.451  
 147.760  
 147.699  
 145.628  
 144.505  
 143.597  
 142.654  
 141.702  
 138.447  
 137.194  
 135.470  
 135.330  
 134.171  
 133.285  
 133.227  
 133.191  
 129.791  
 129.535  
 129.164  
 129.129  
 129.117  
 128.659  
 128.349  
 128.146  
 128.087  
 127.968  
 127.677  
 126.855  
 124.628  
 124.095  
 123.352  
 119.680  
 117.806  
 77.517  
 77.200  
 76.882  
 54.676  
 21.832  
 21.733  
 17.163

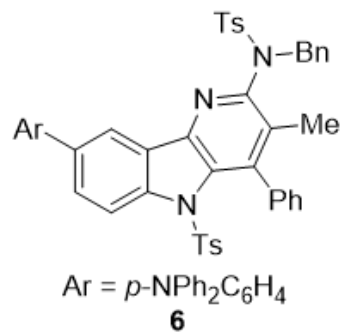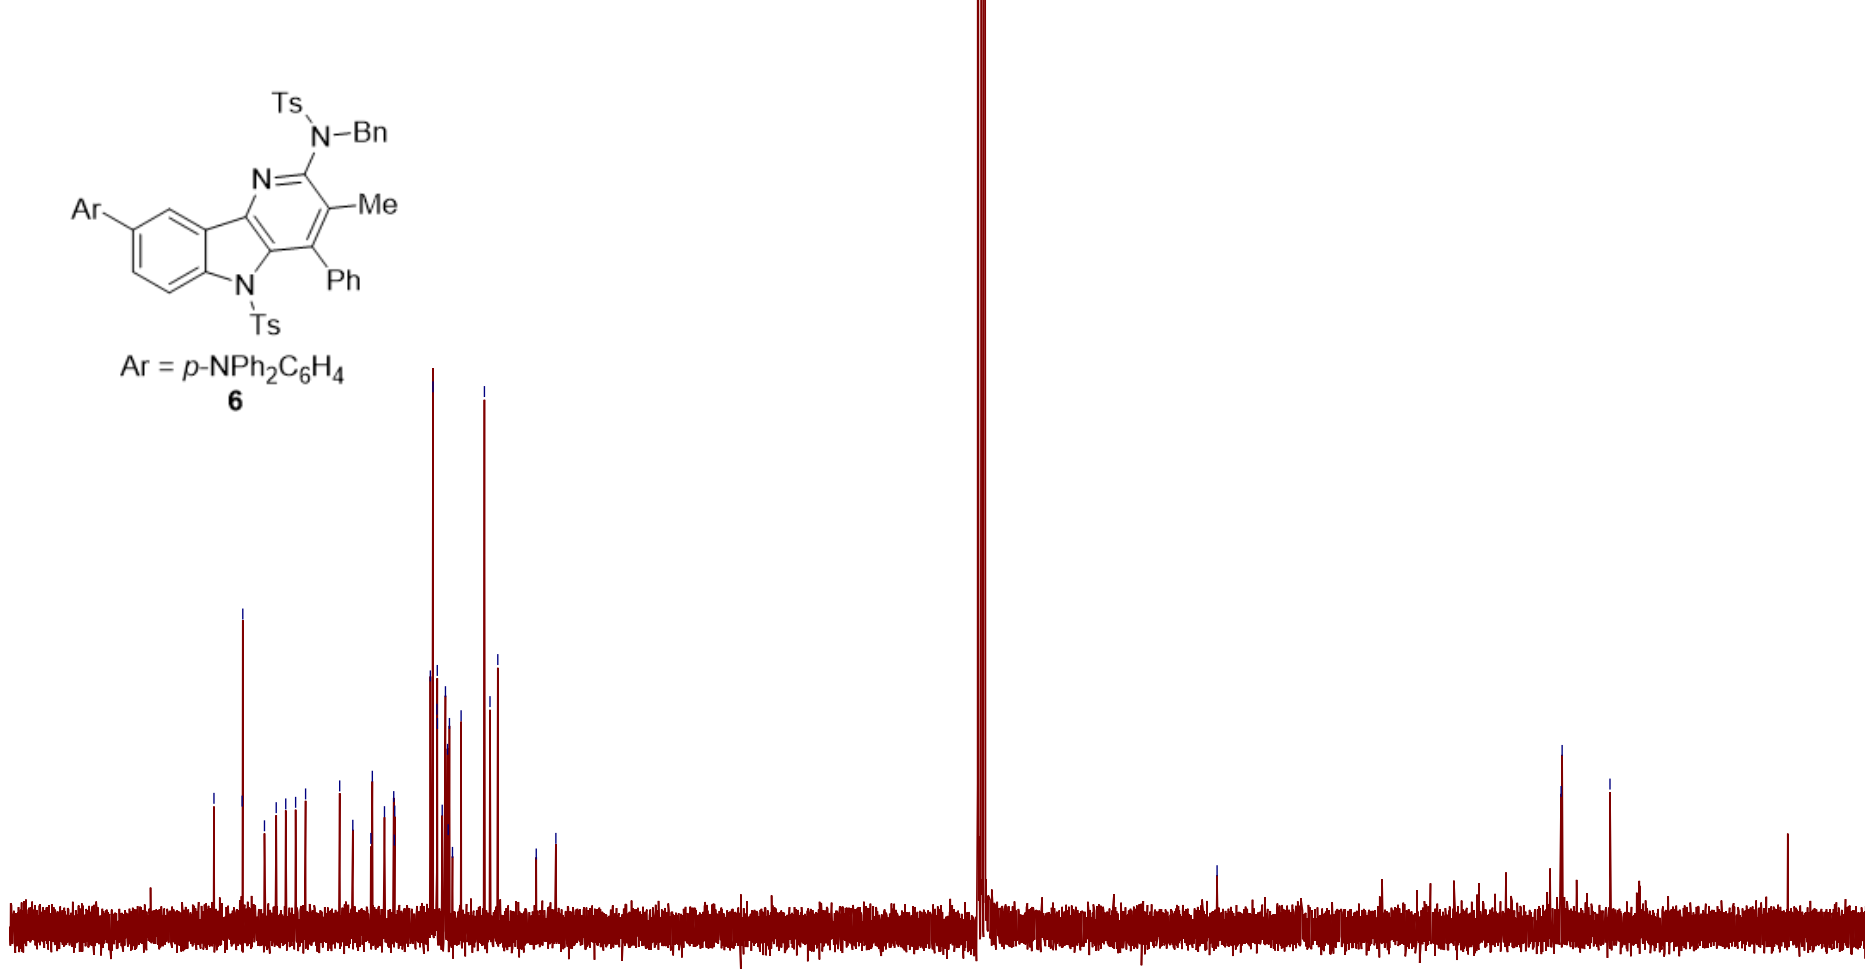

160 150 140 130 120 110 100 90 80 70 60 50 40 30 20 10 0  
 f1 (ppm)

ZJ-X-37DMSO pure/10

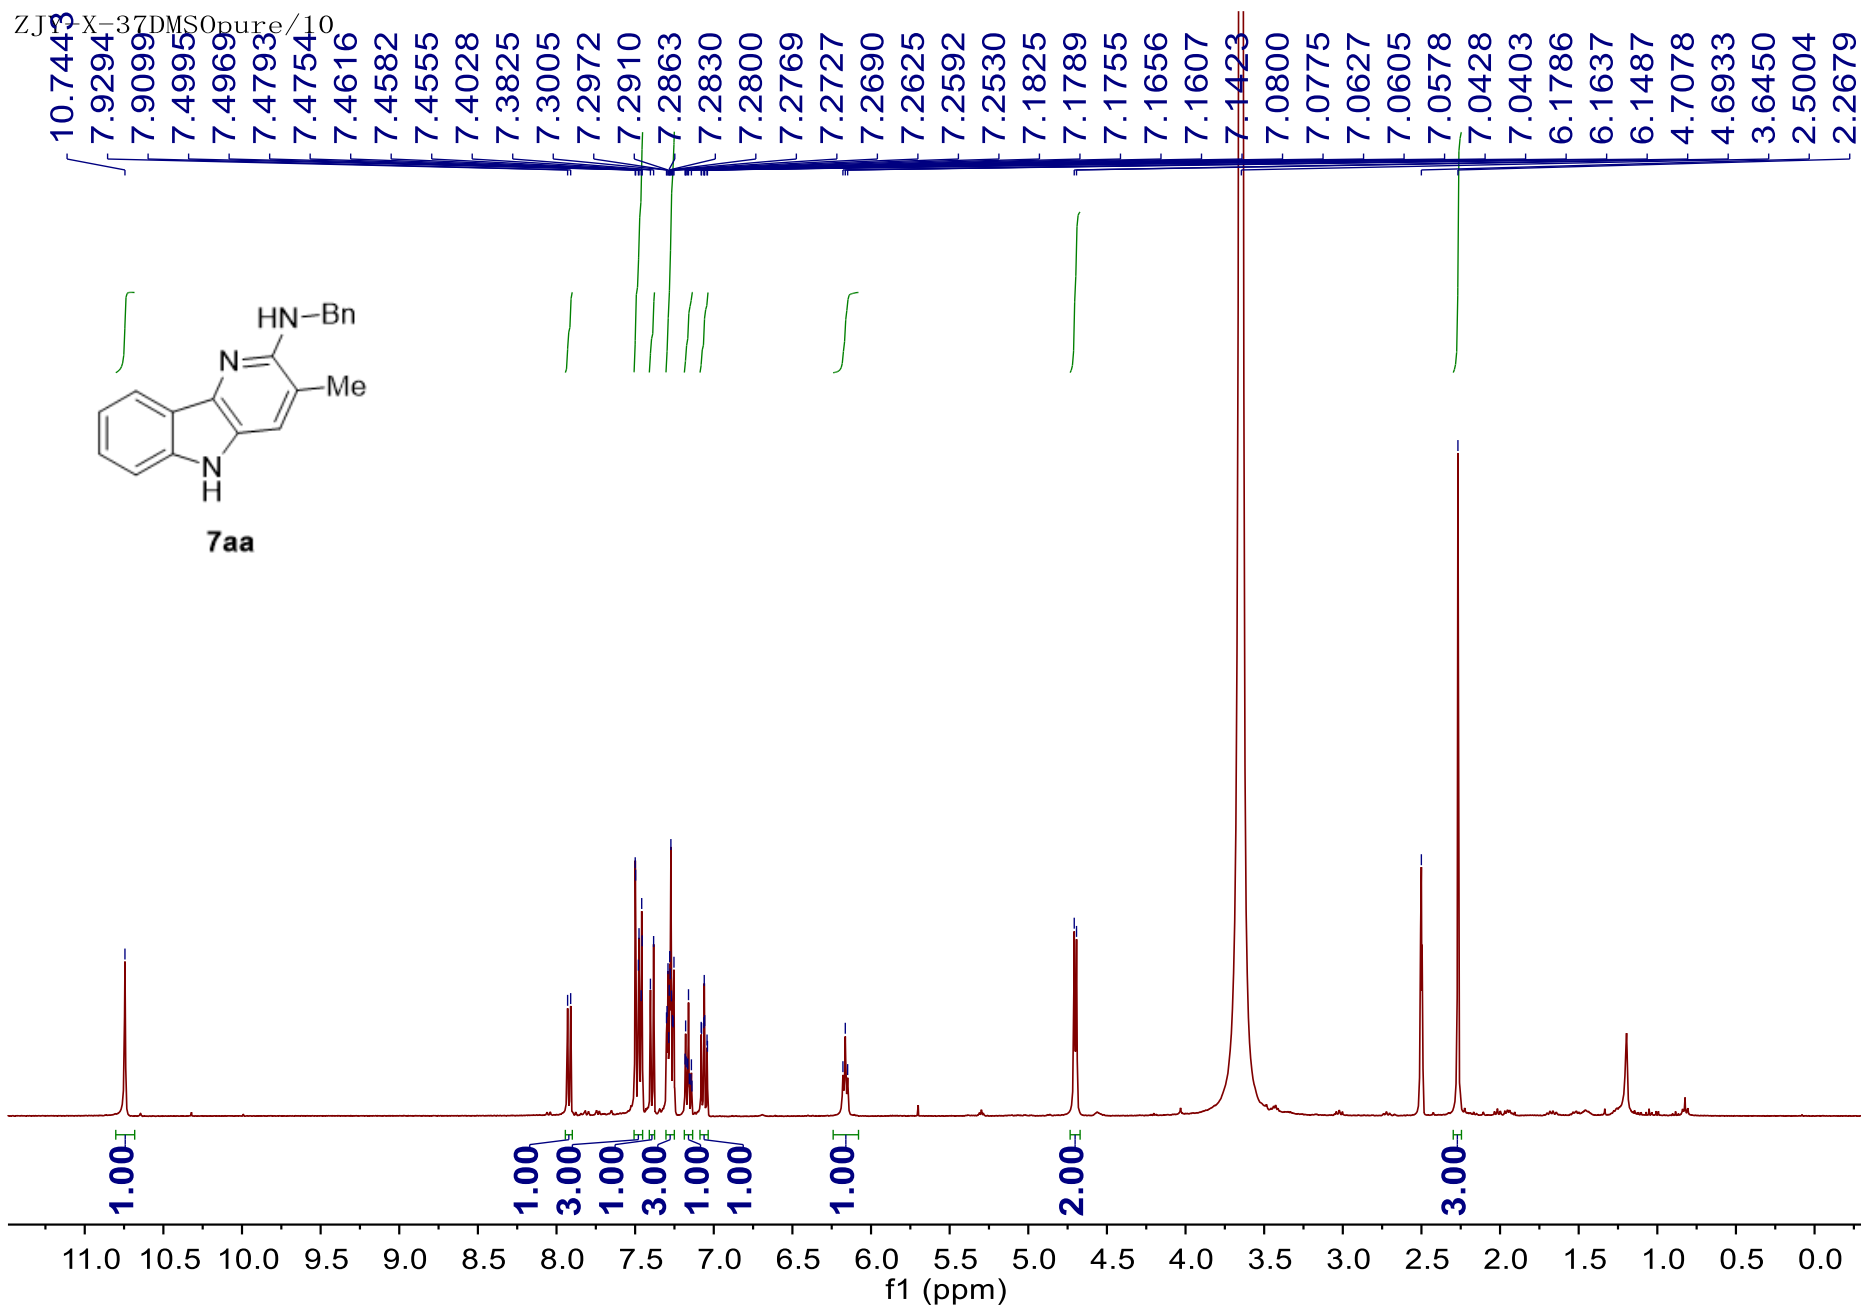

ZJY-X-37DMSOpur

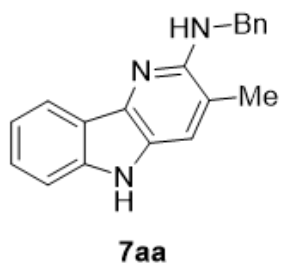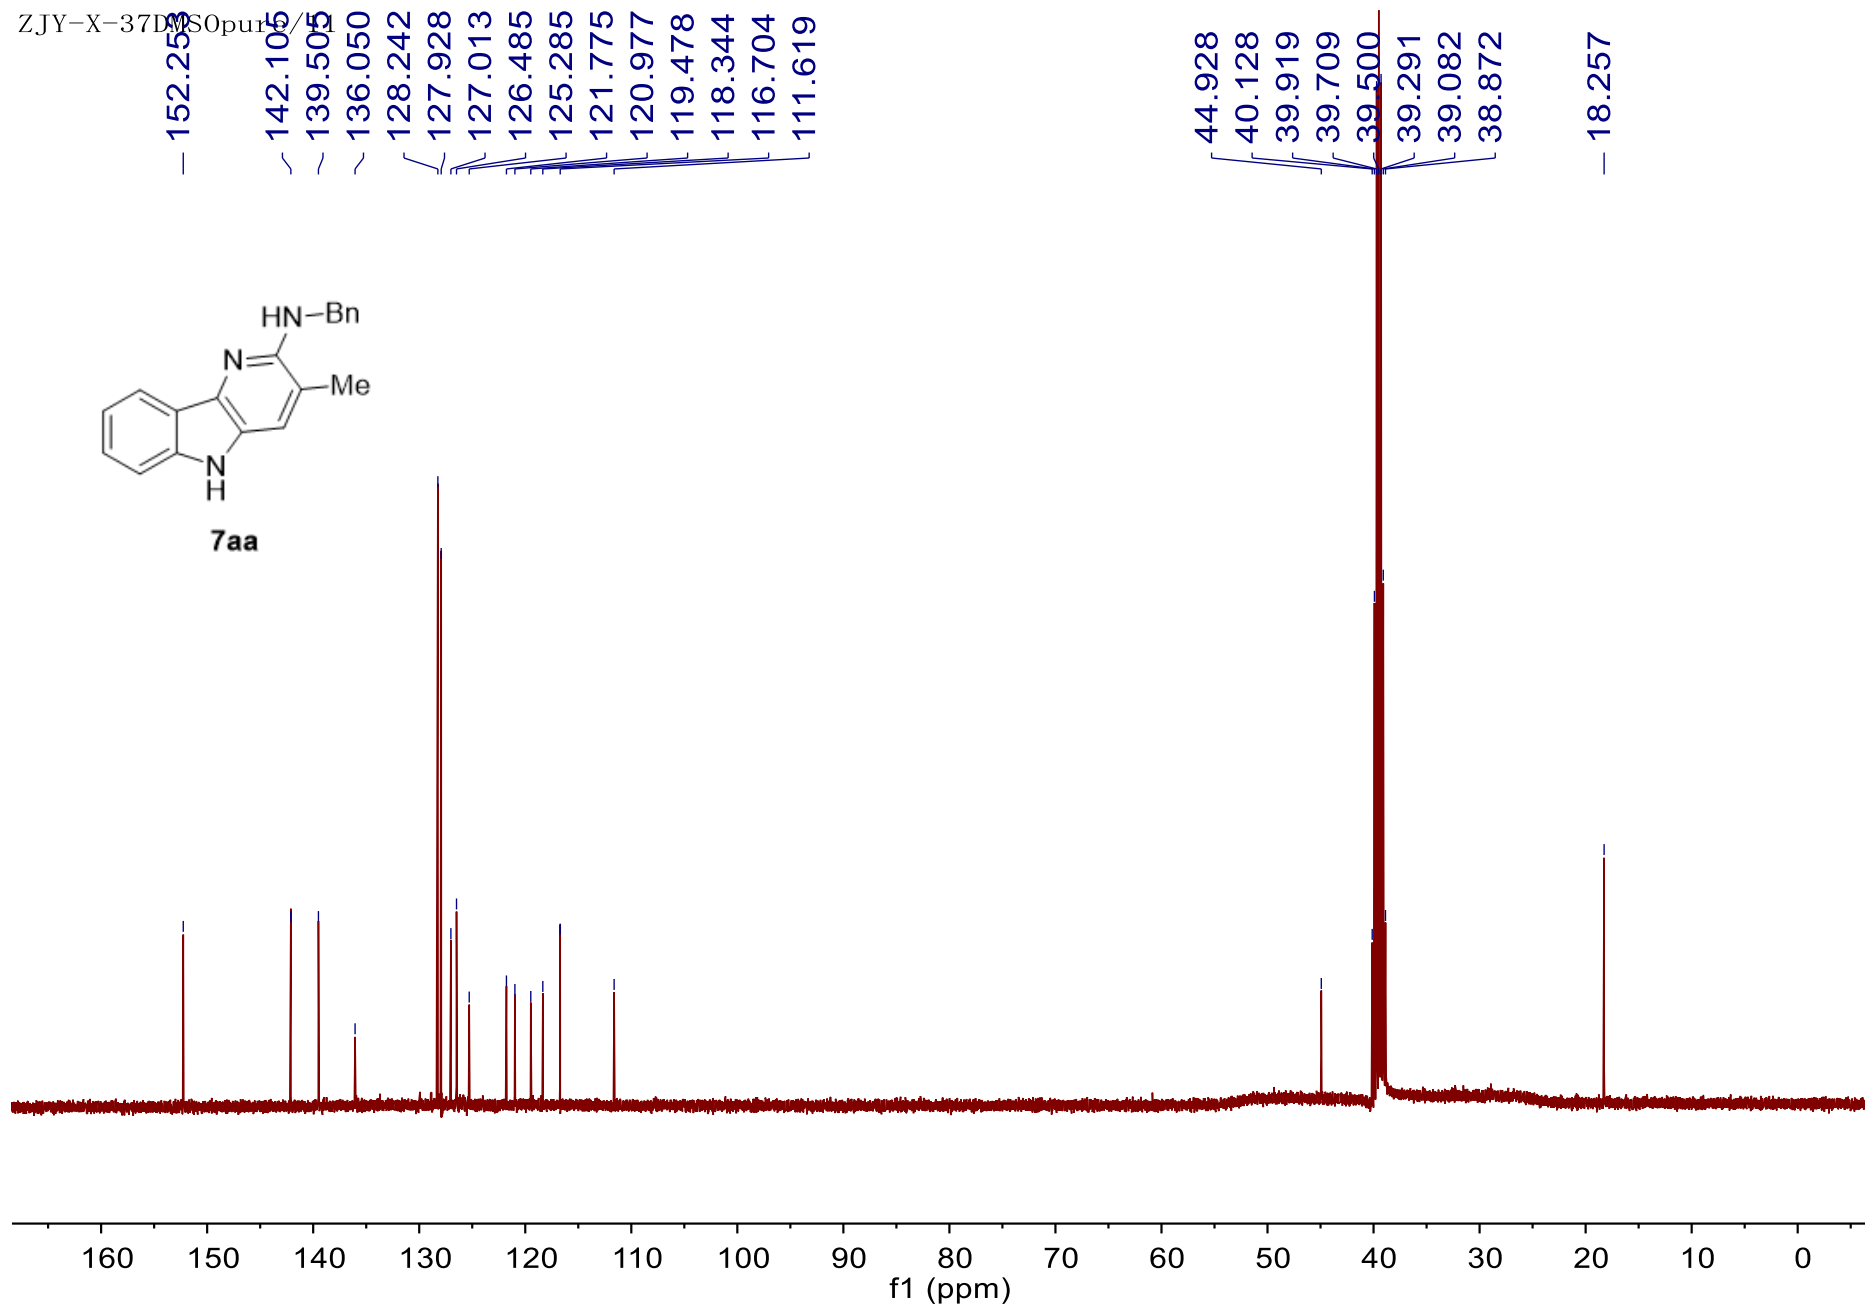

ZJY-X-1-1-10.fid

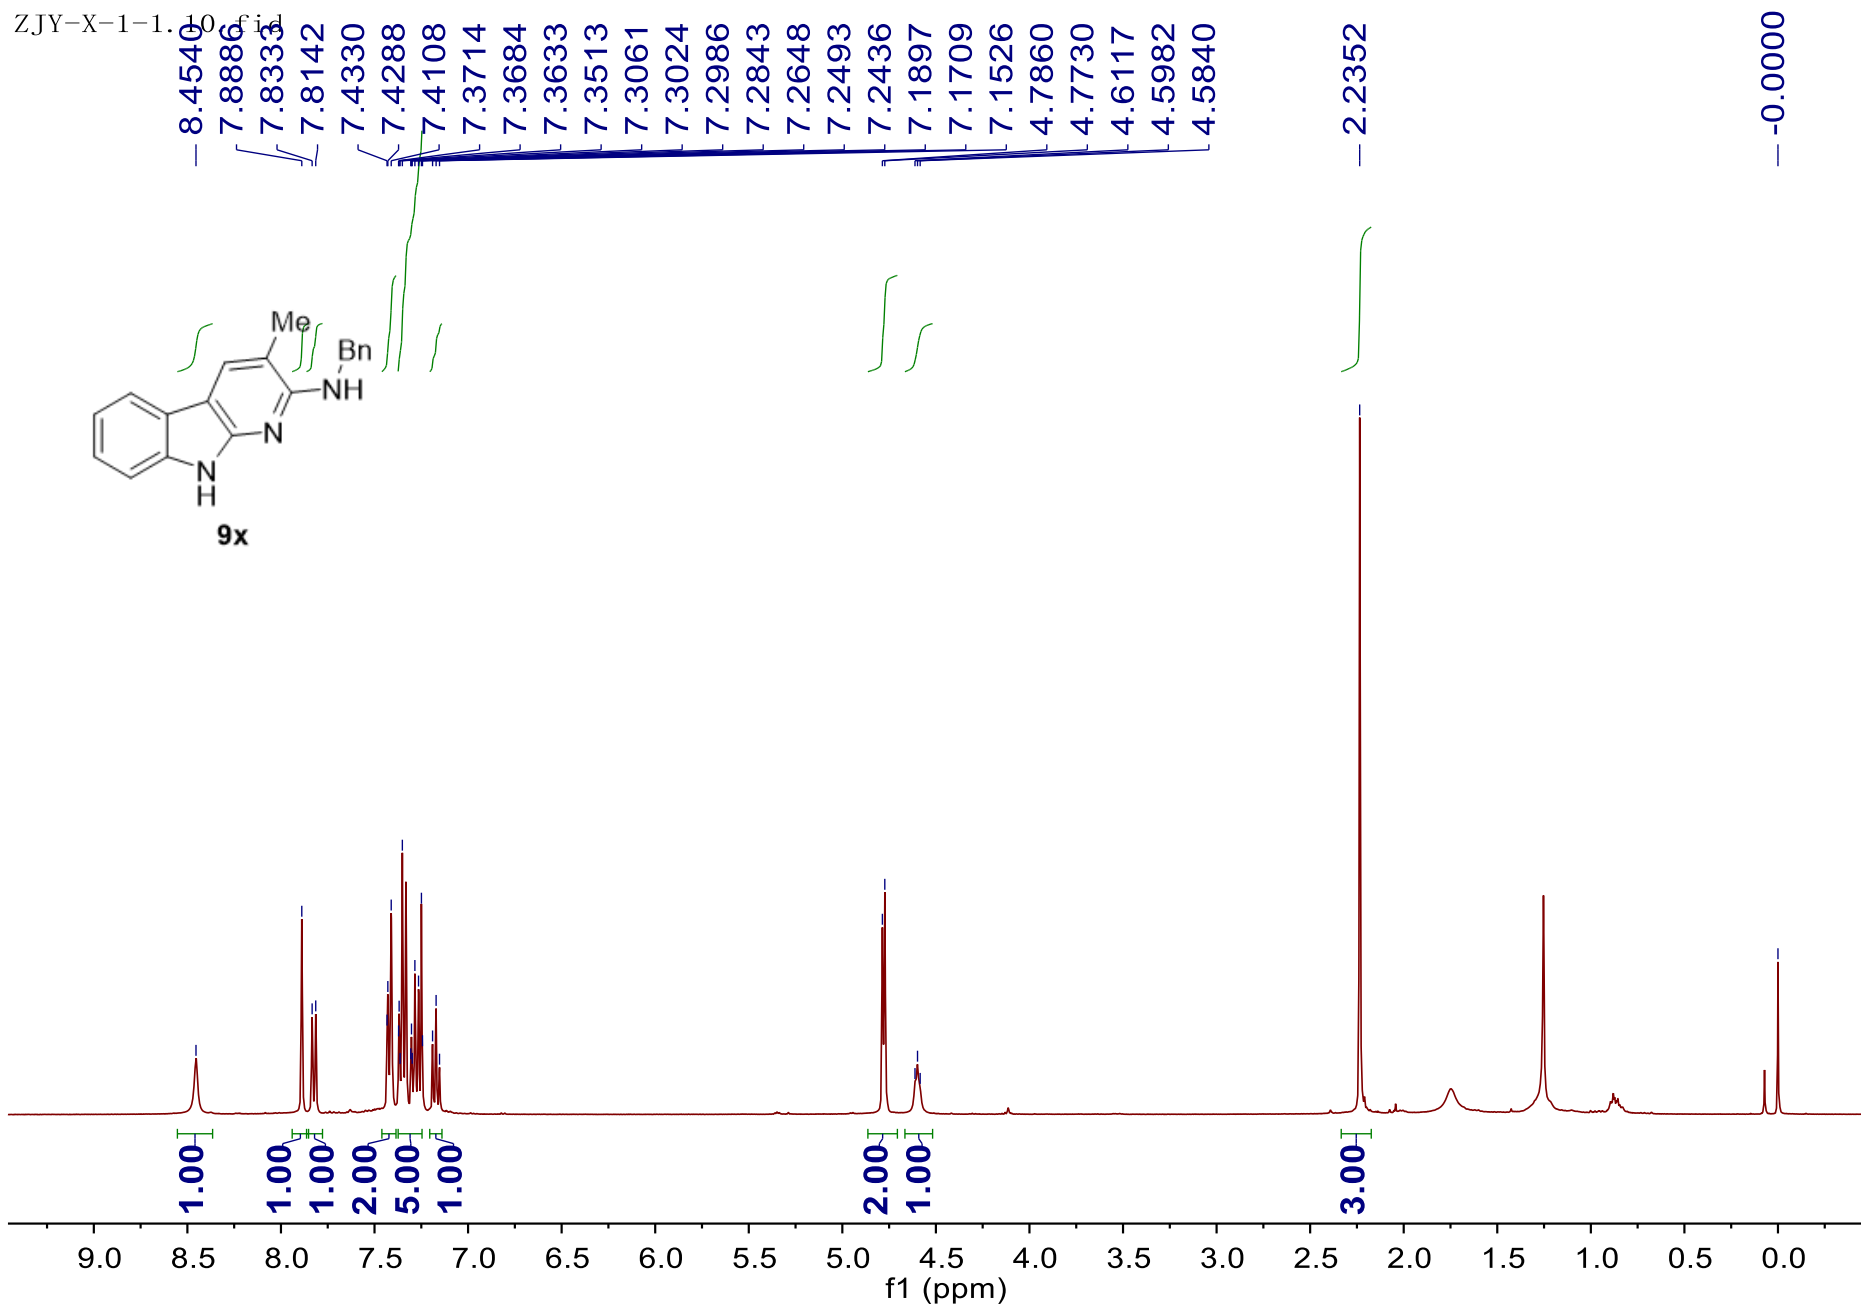

ZJY-X-102

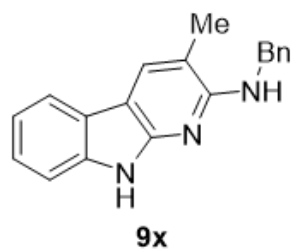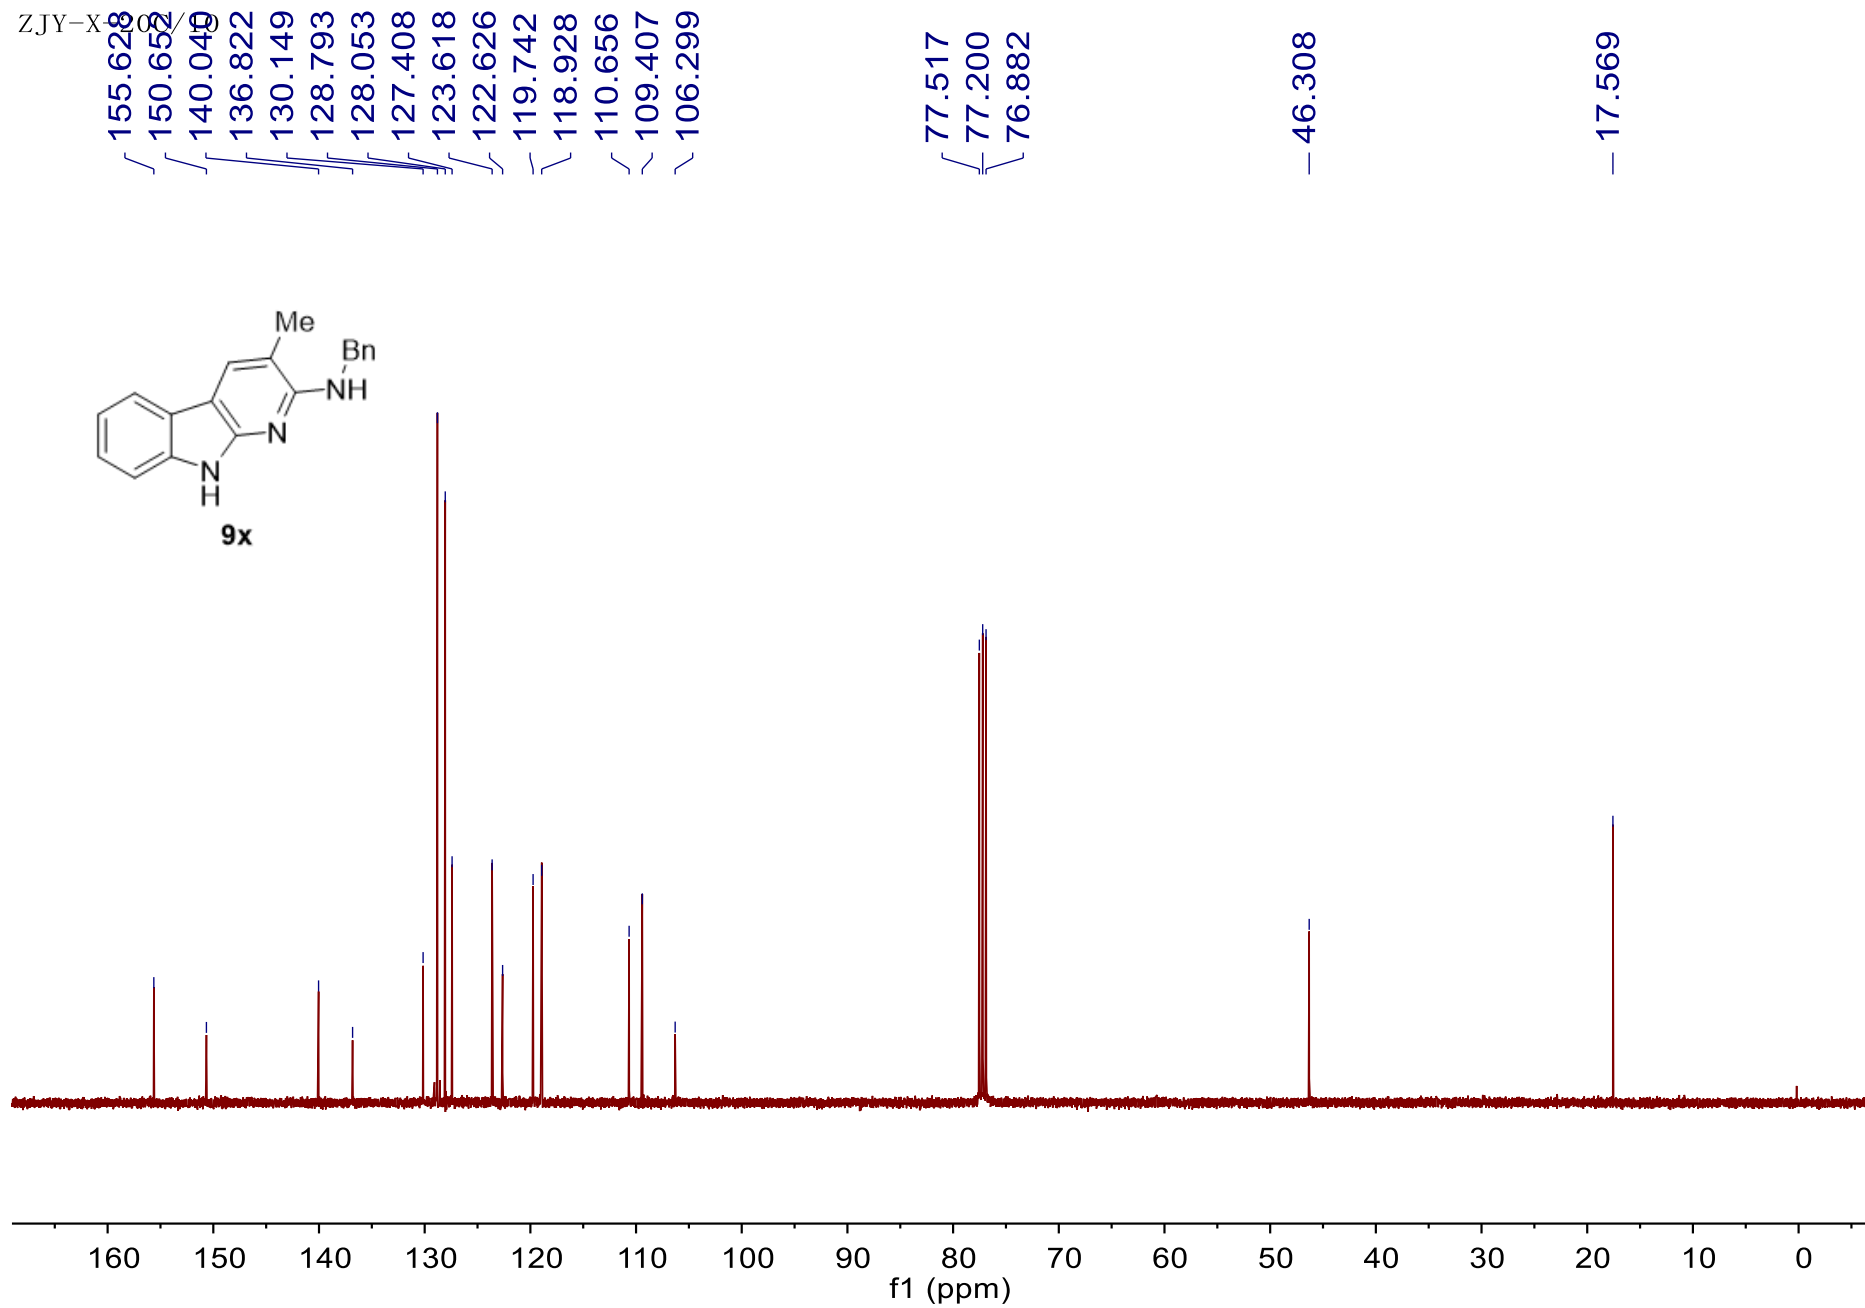

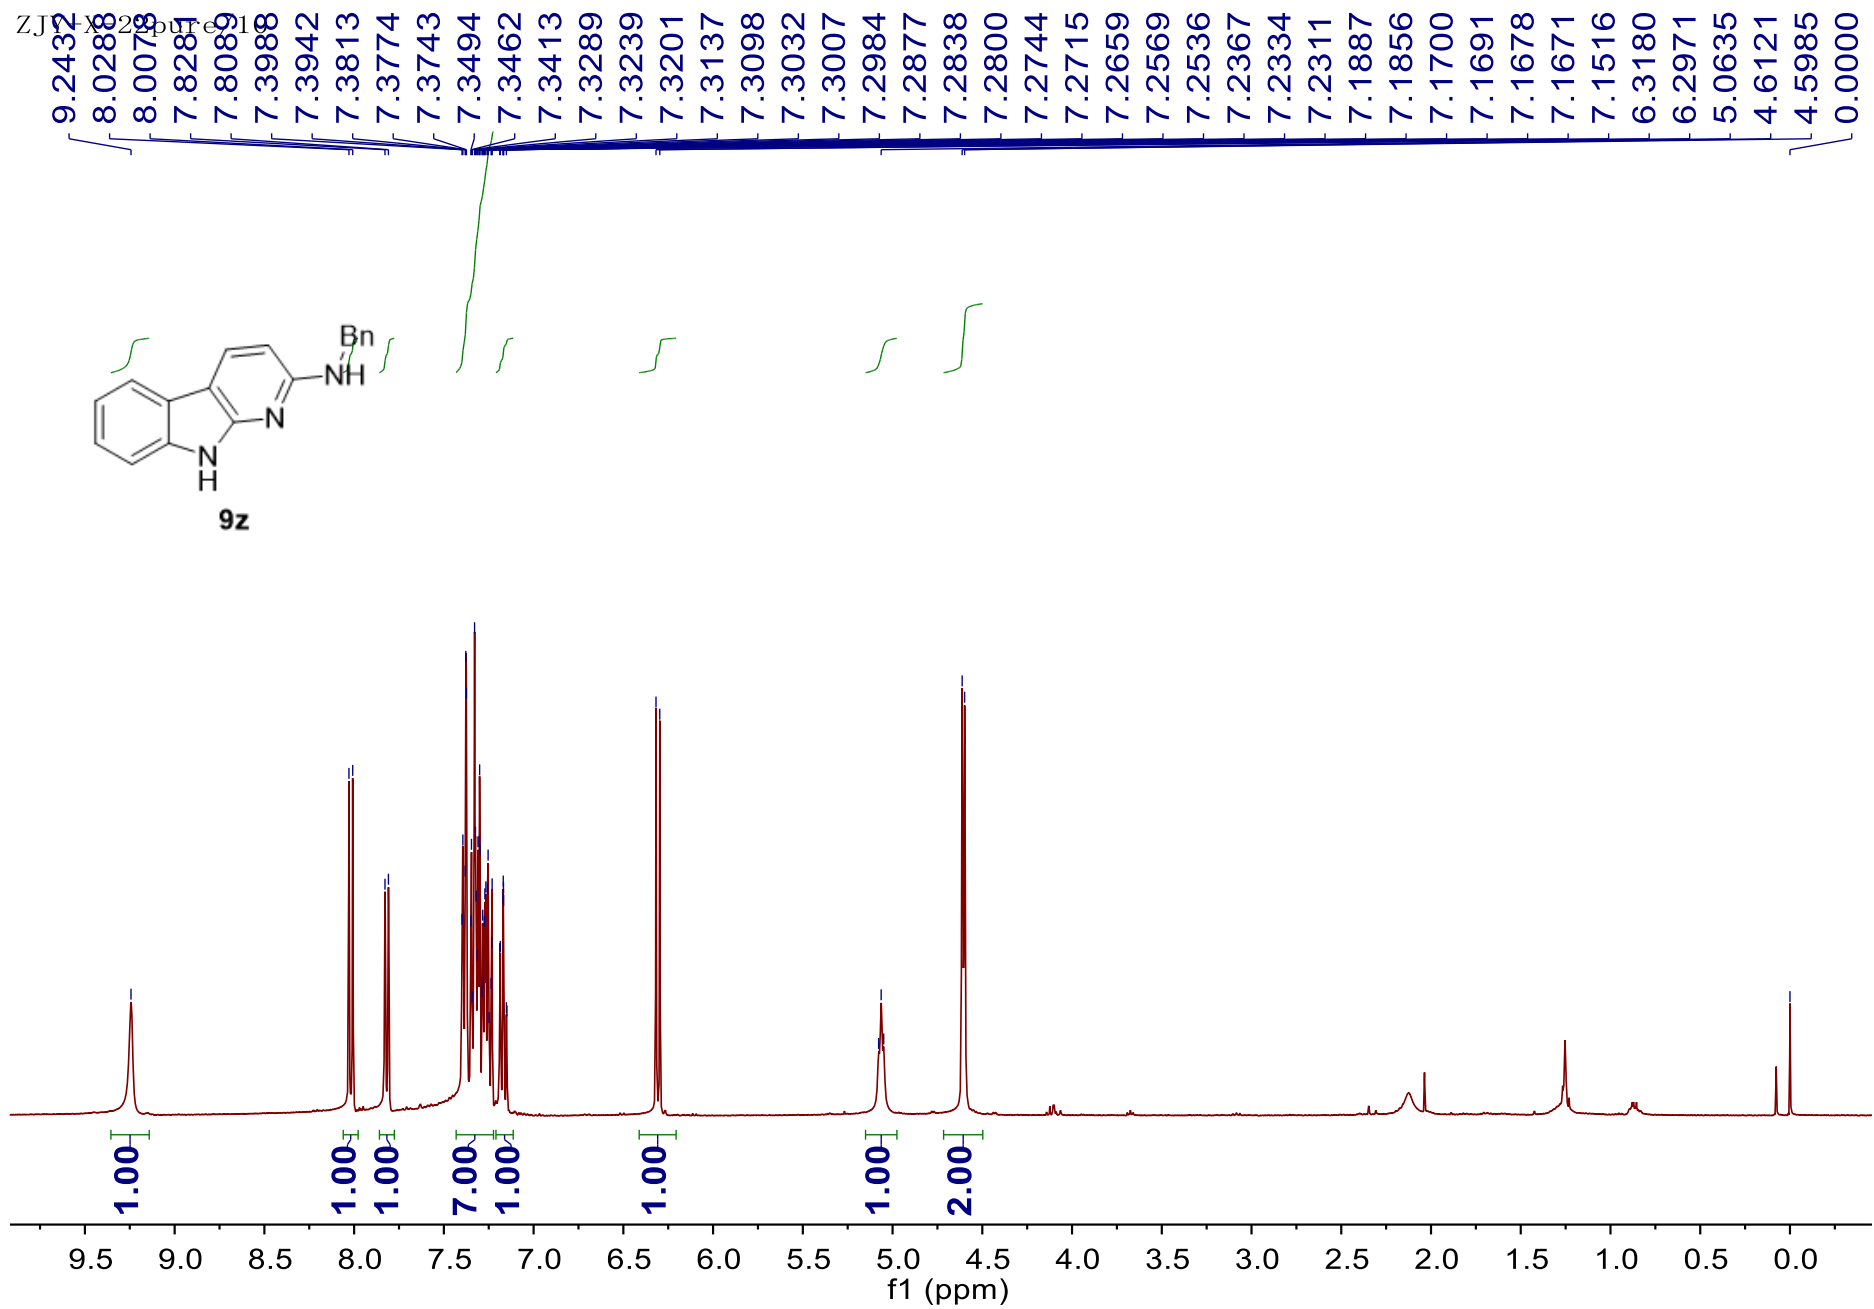



ZJY-X-2 pure 1

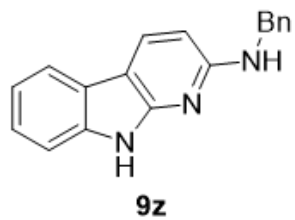

157.649  
152.128  
139.384  
137.128  
130.697  
128.835  
127.717  
127.479  
124.081  
122.623  
120.009  
119.084  
110.728  
107.281  
100.416

77.517  
77.200  
76.882

46.827

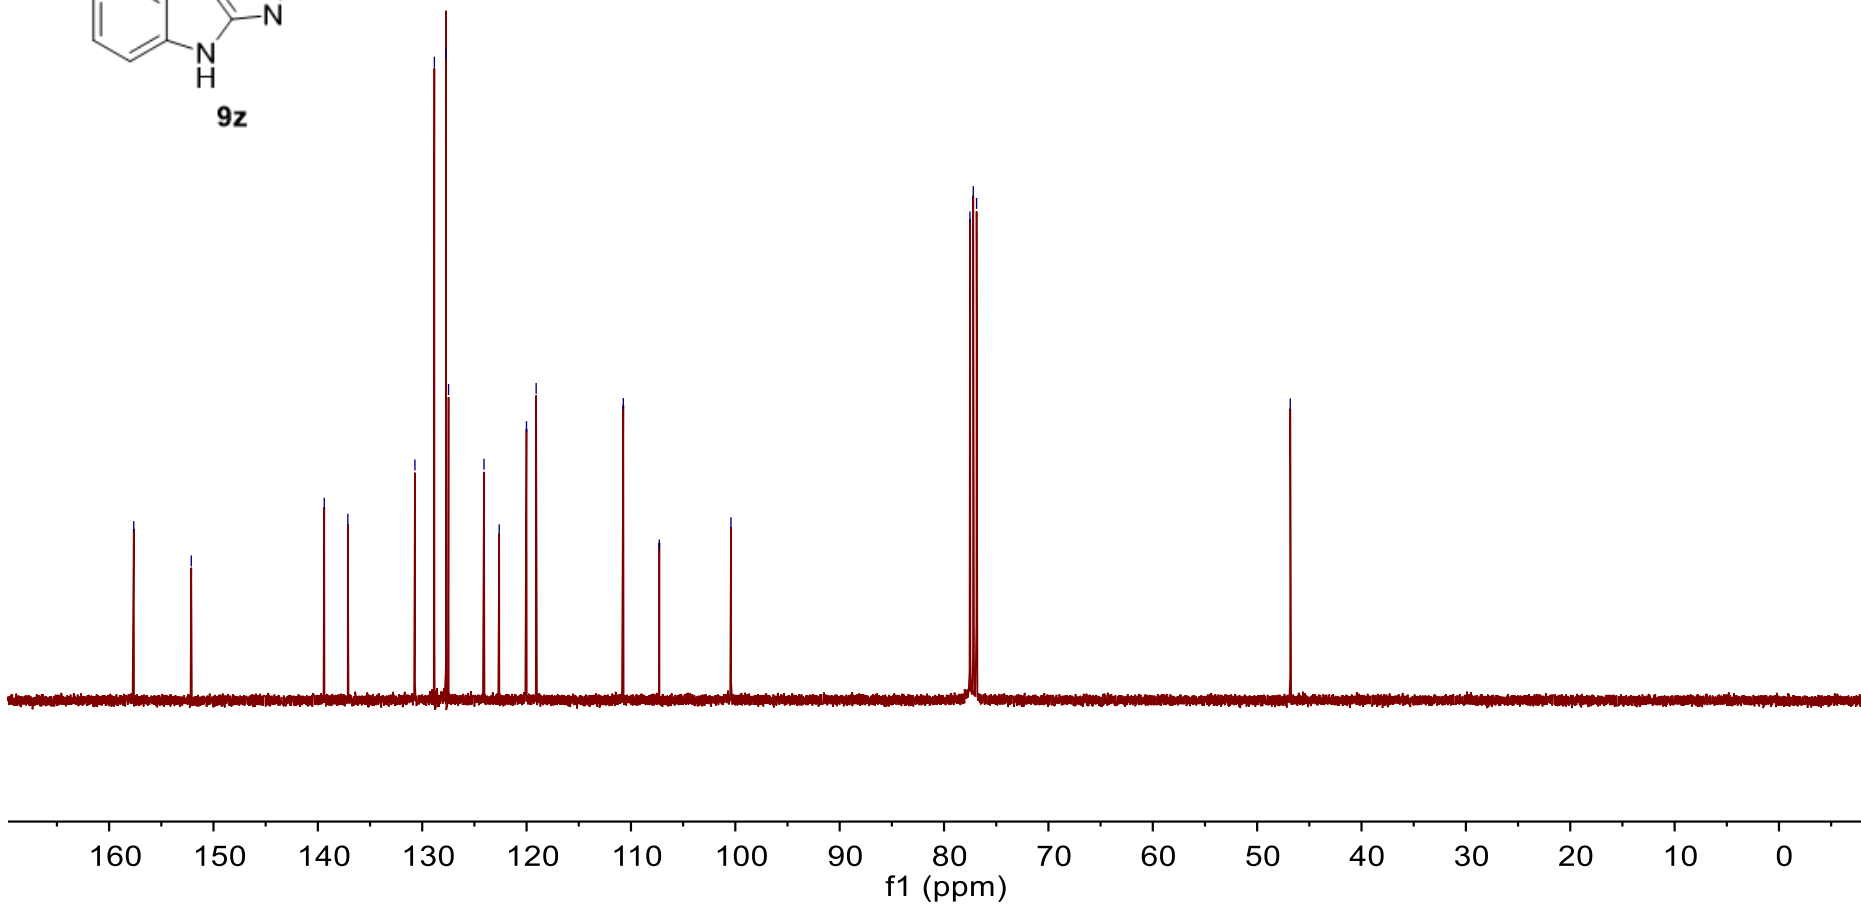

ZJY-X070.10.fid

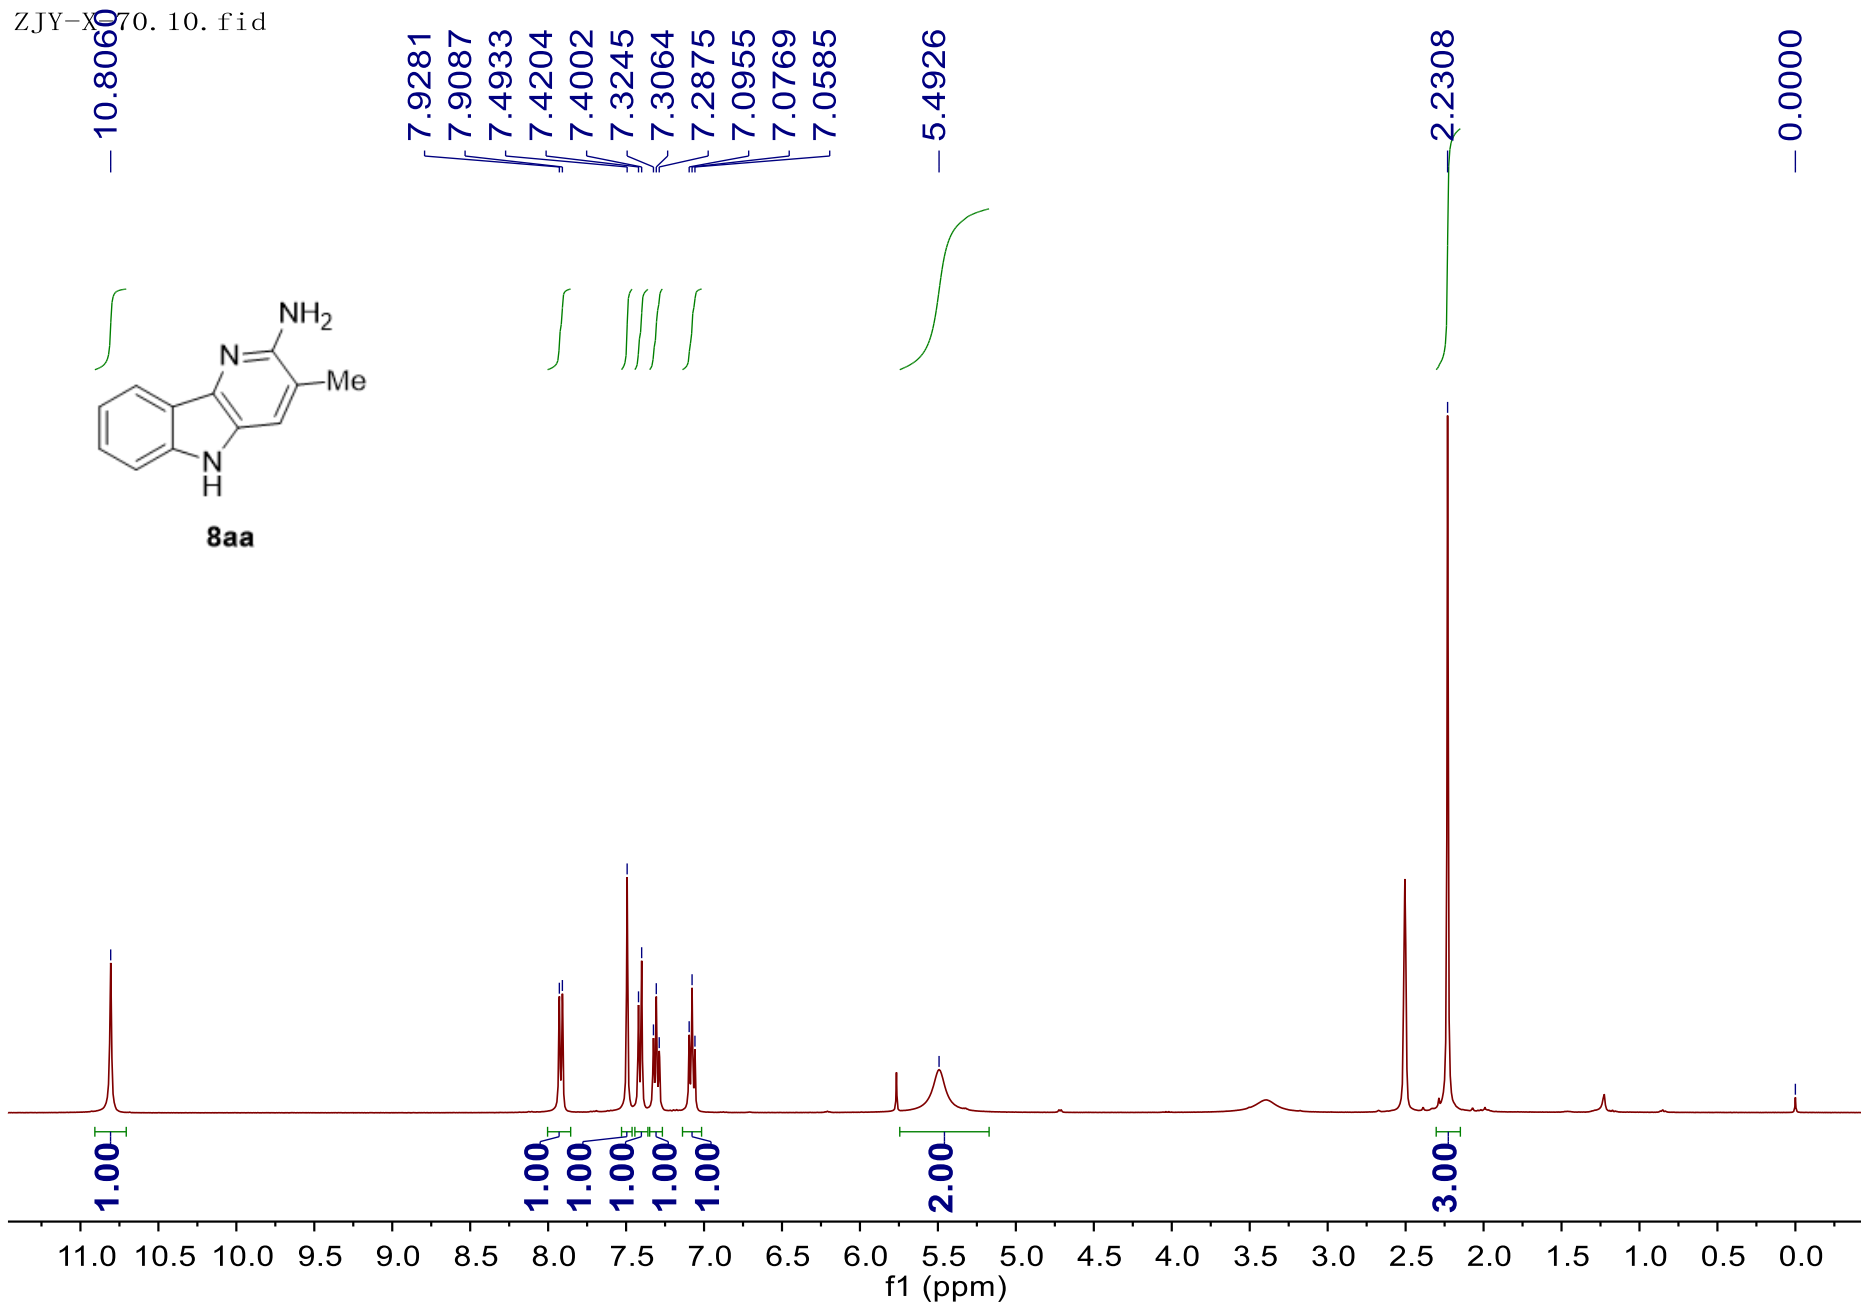

ZJY-X-70.0.fid

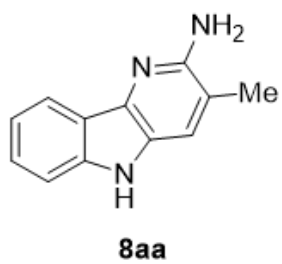

153.142  
139.469  
136.050  
127.365  
125.132  
121.228  
120.766  
119.245  
118.064  
115.899  
111.381

40.126  
39.918  
39.709  
39.500  
39.293  
39.083  
38.874

18.155

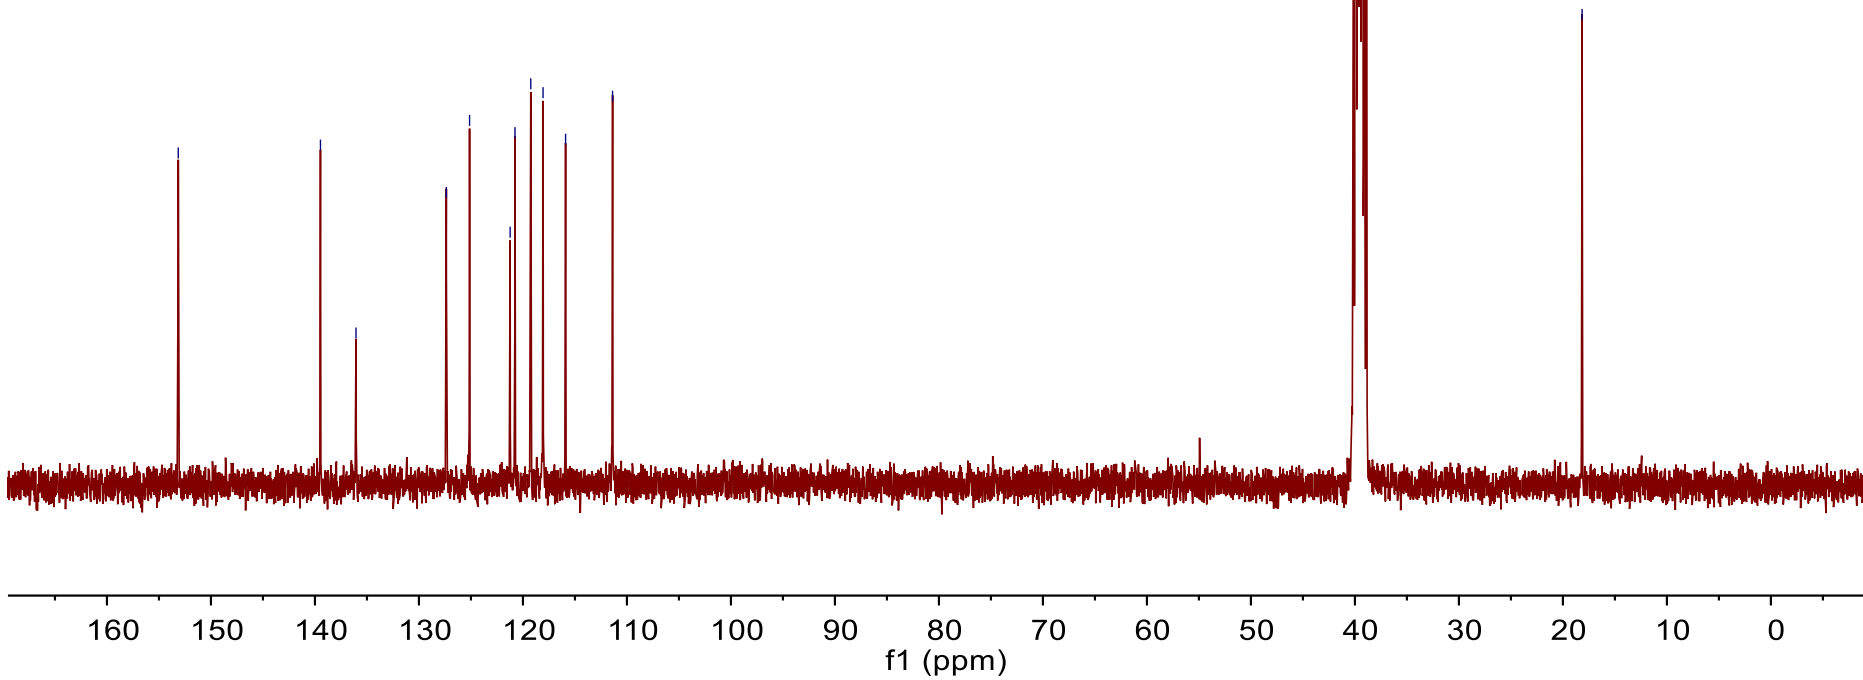

ZJYX-69.10.fid

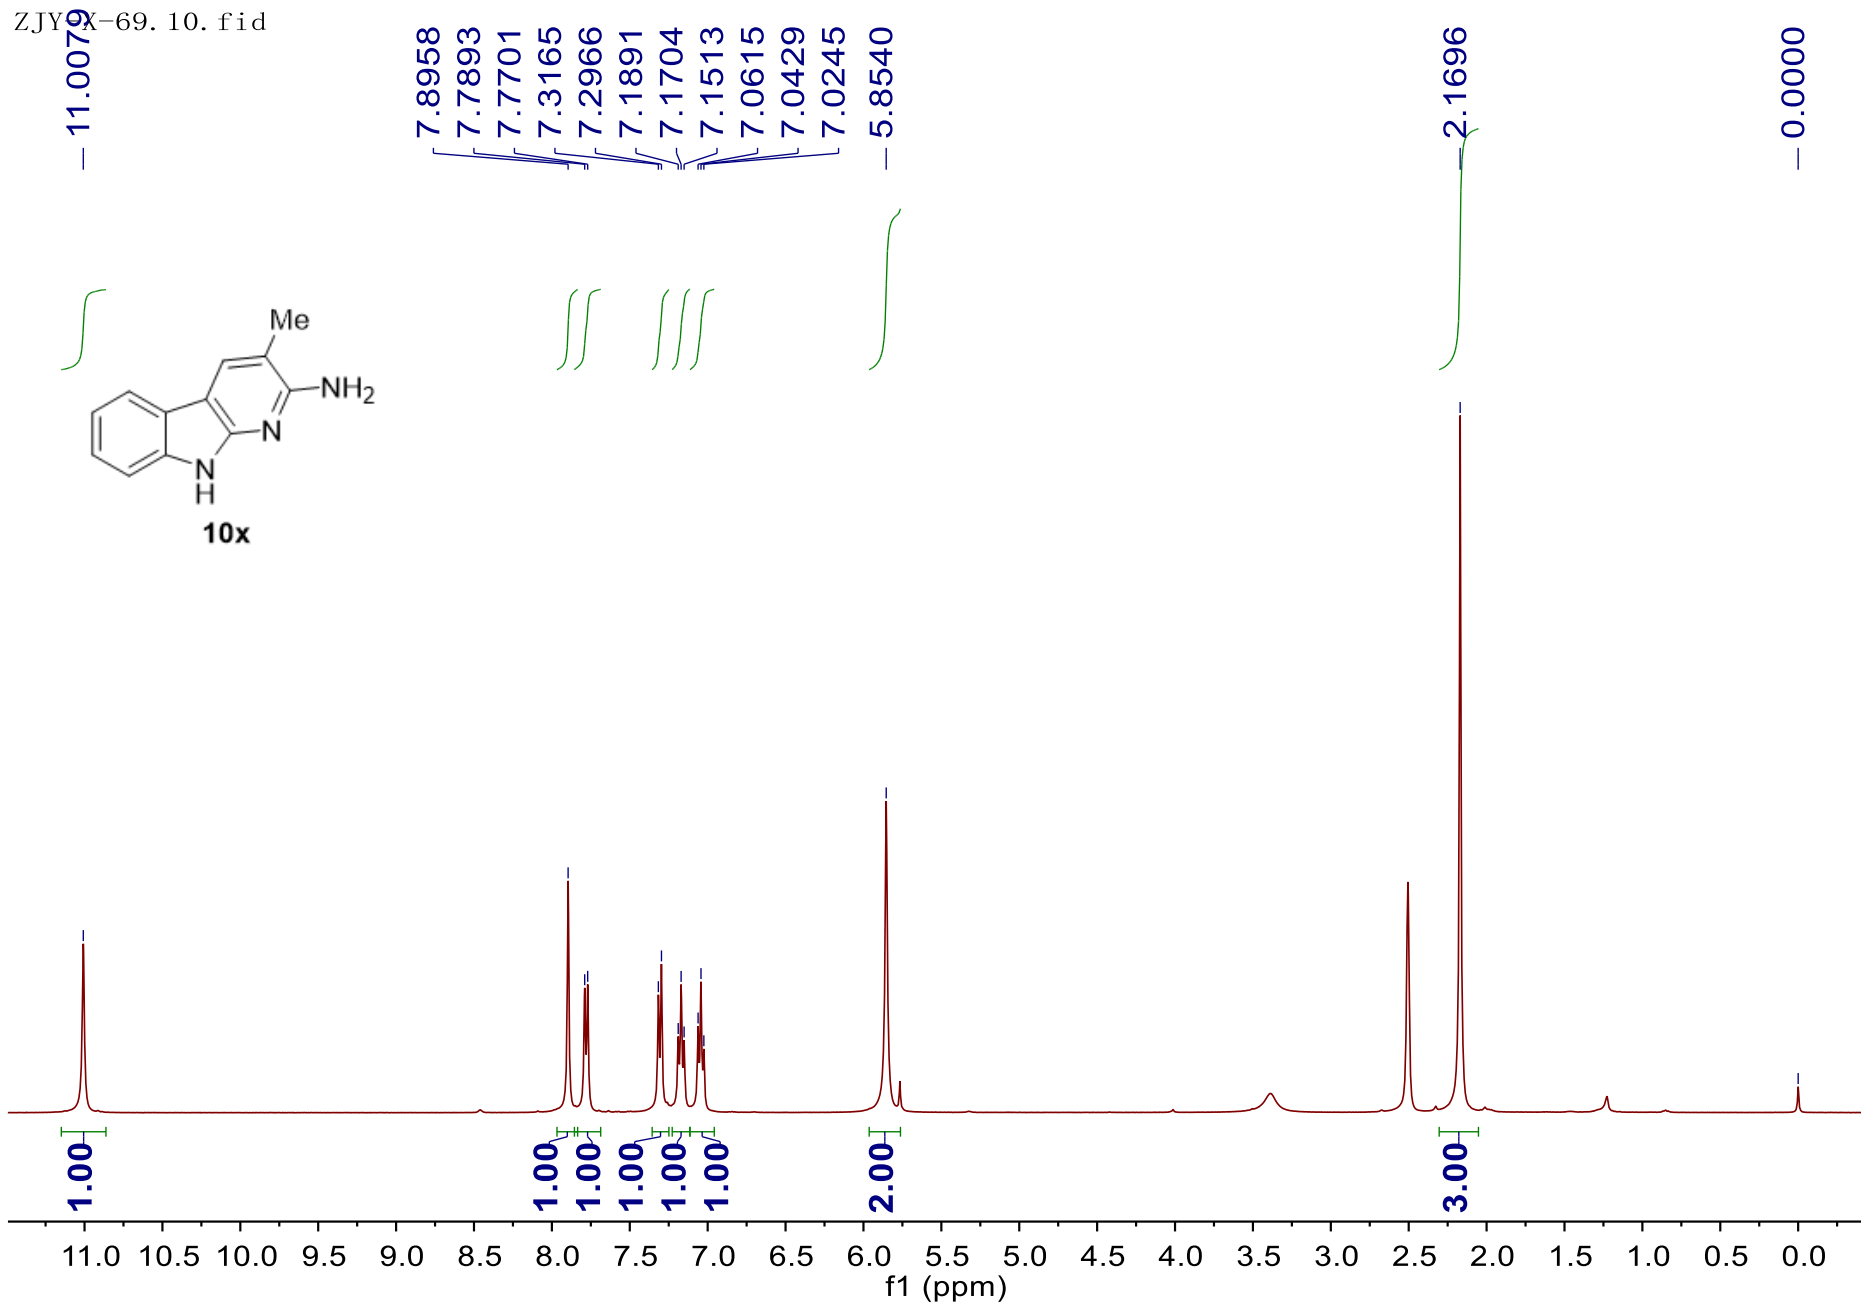

ZJY-X-69.1.fid

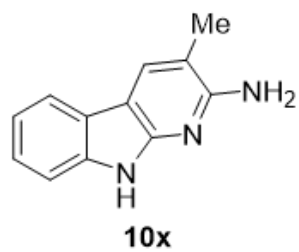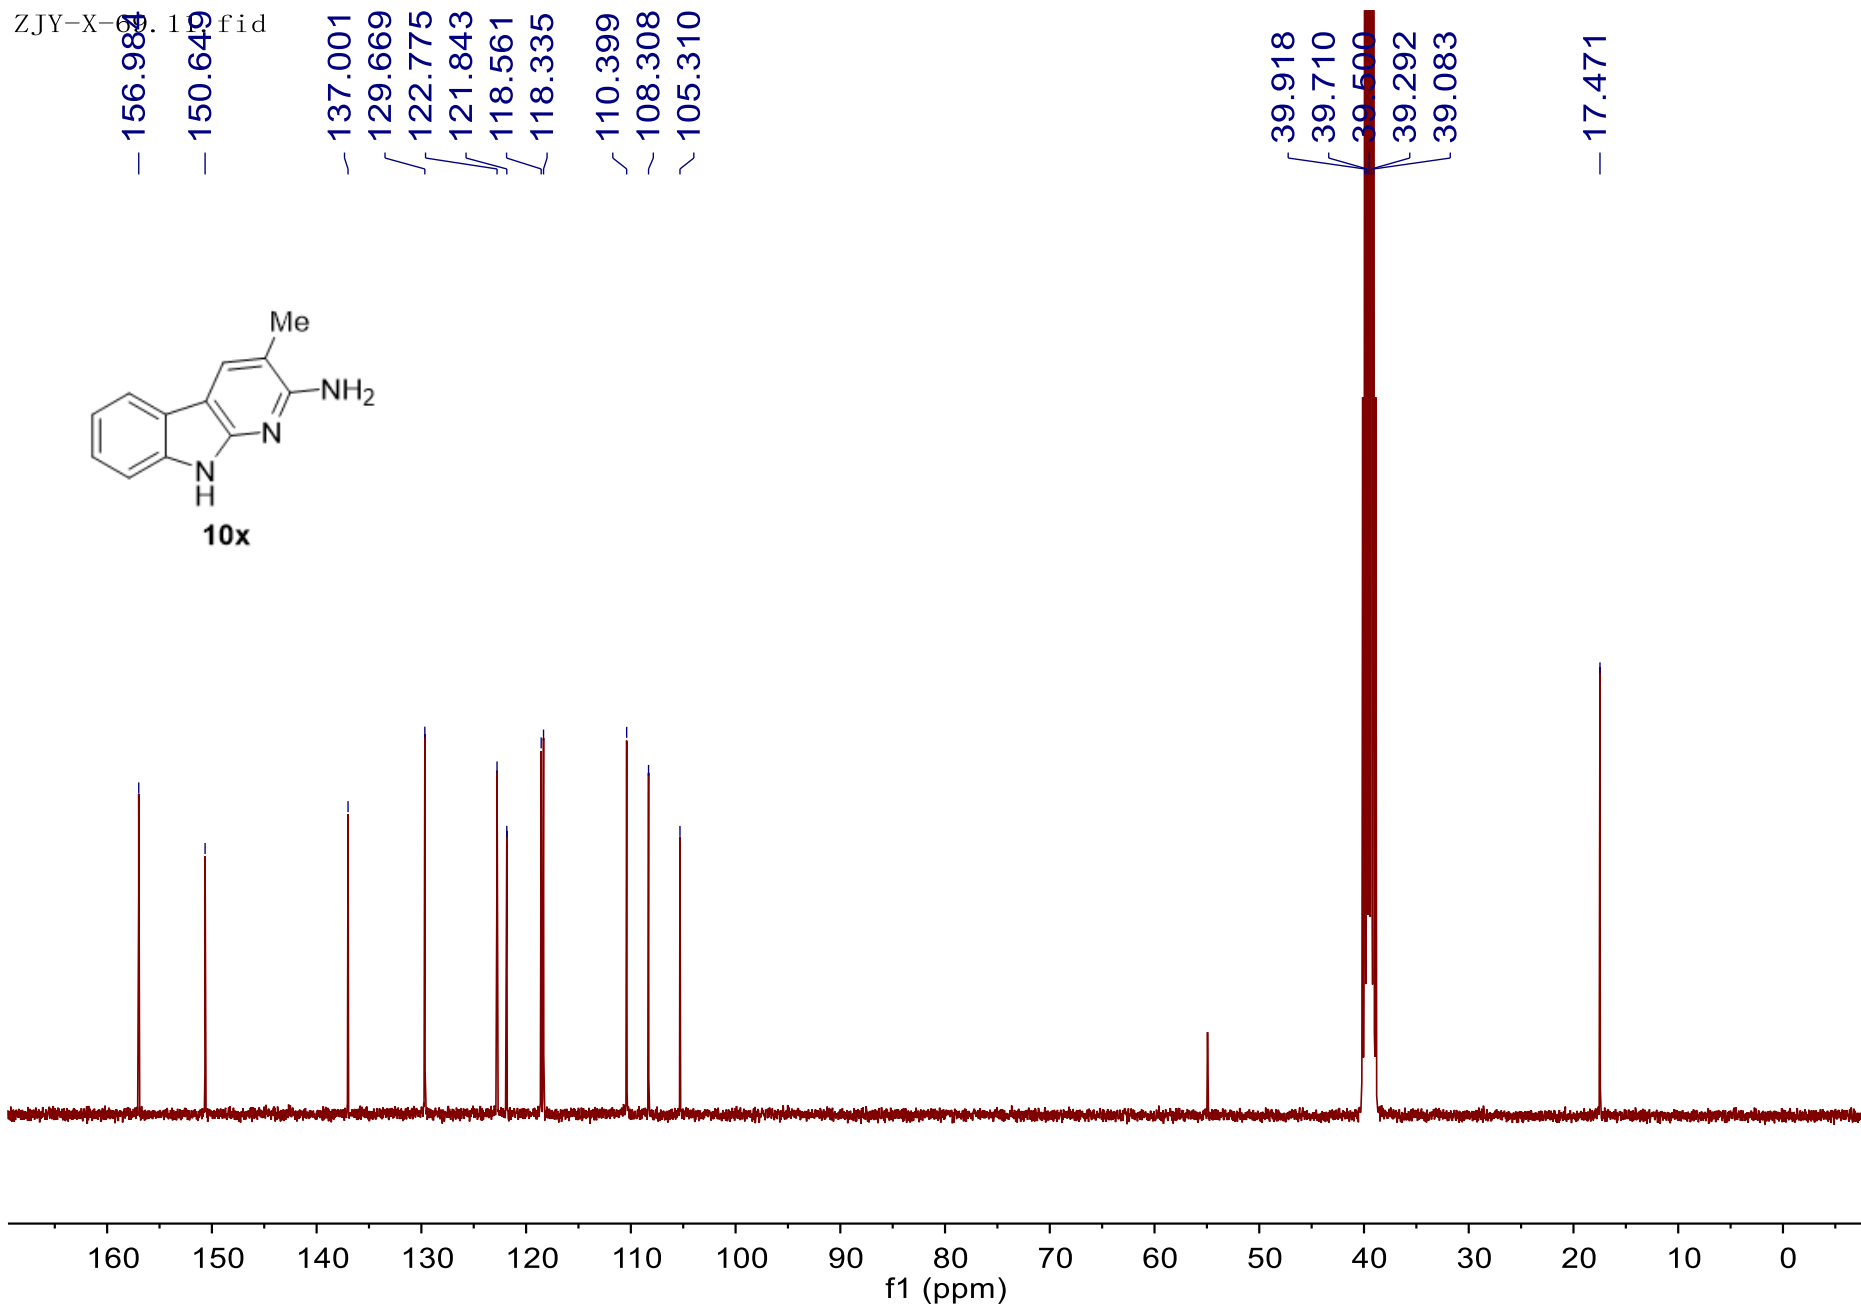

ZJ5-X-71.10.fid

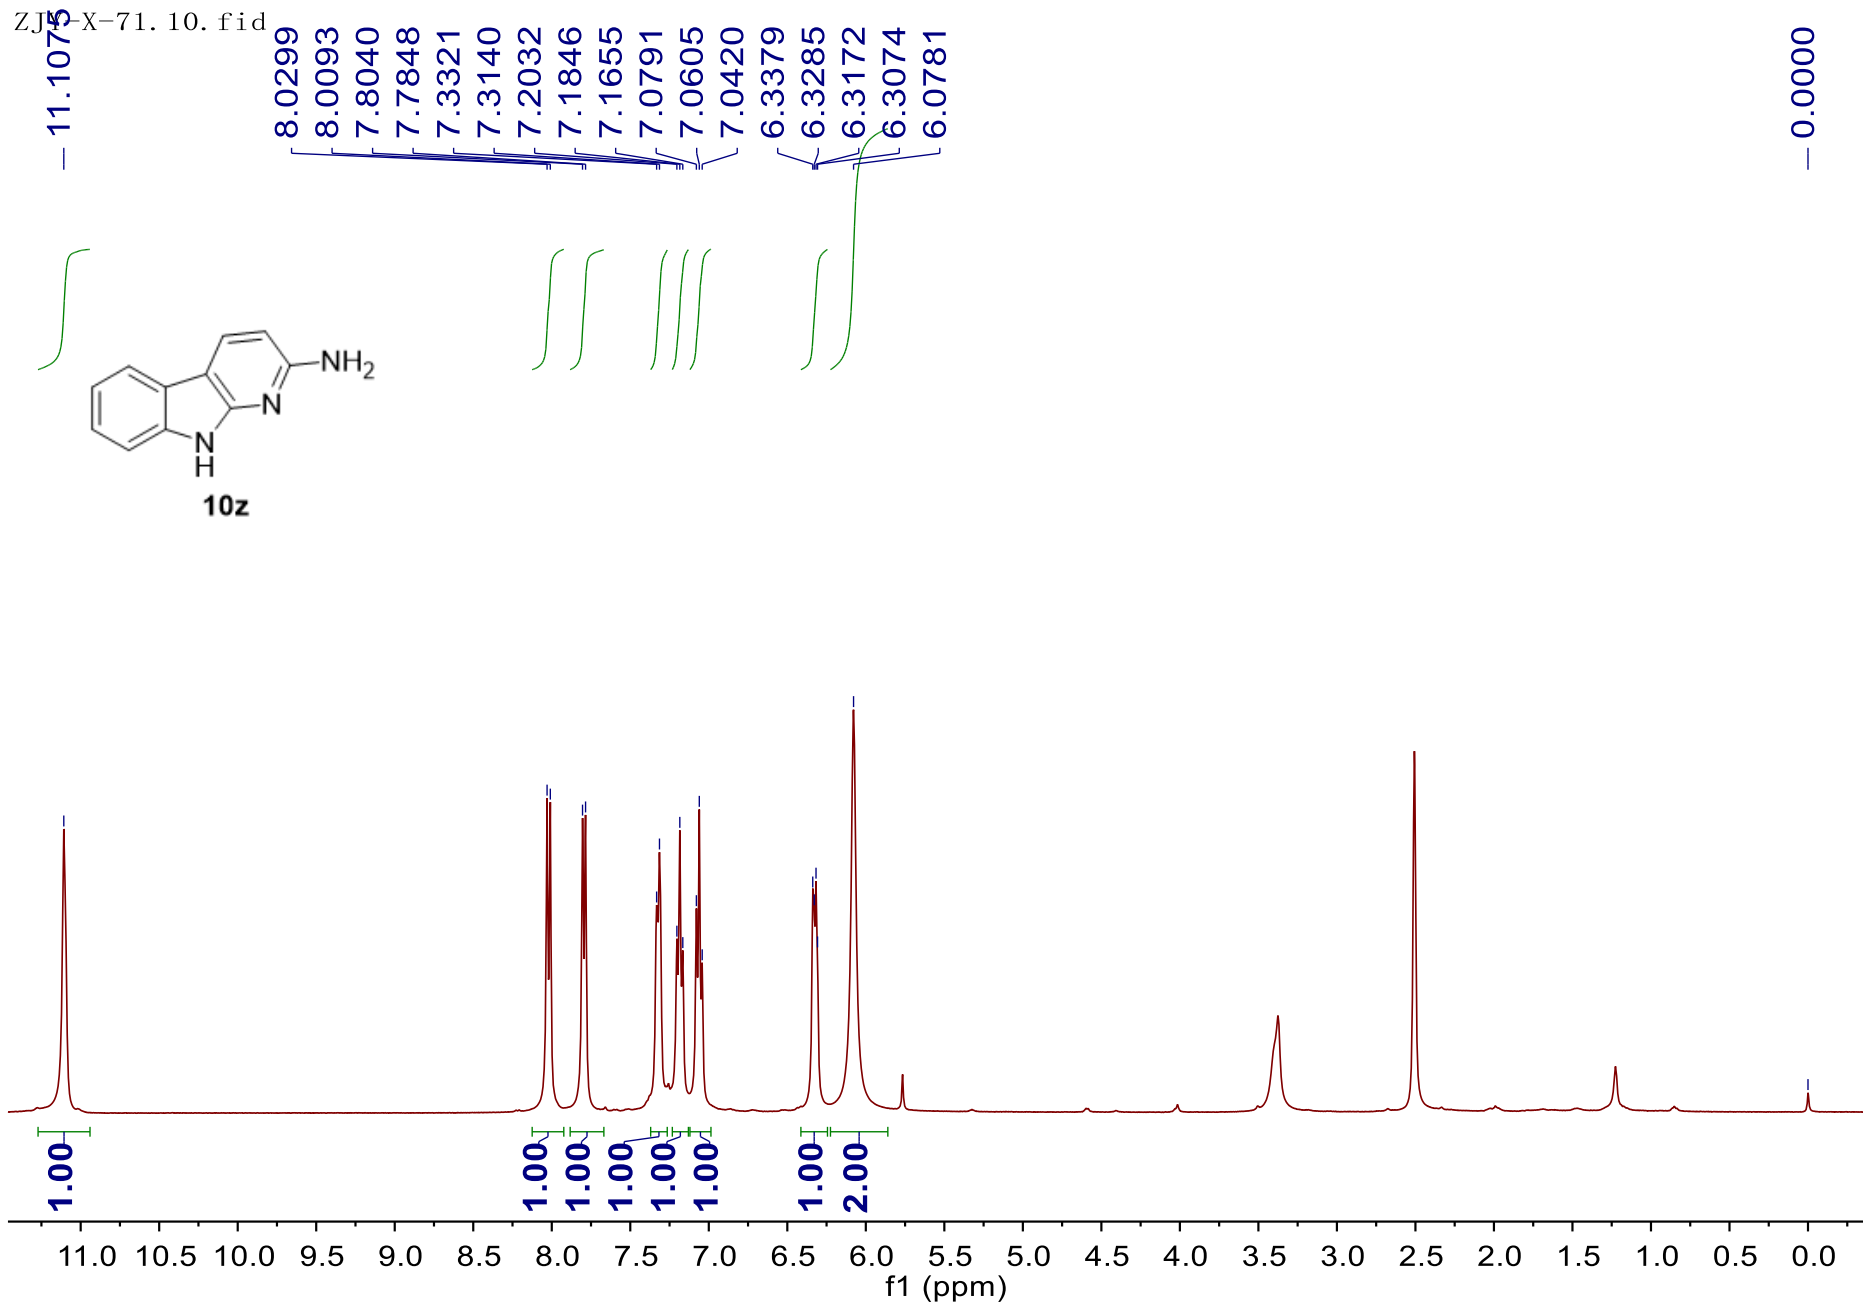

ZJY-X-1.fid

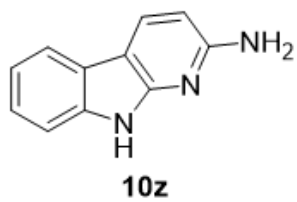

158.673  
152.049  
136.953  
129.912  
122.924  
122.046  
118.819  
118.349  
110.470  
104.770  
101.134

39.918  
39.710  
39.500  
39.292  
39.083

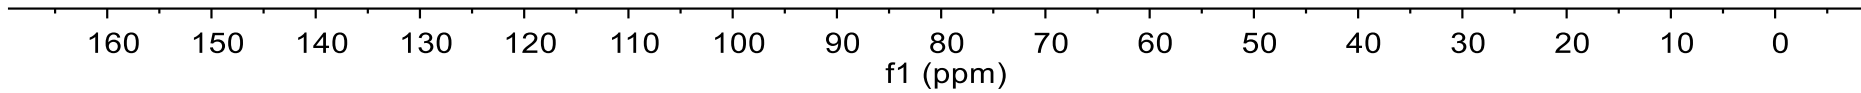

Supplement: Supplementary file 1 [file 14327117]
